# Supplementary material for: Protein composition of axonal dopamine release sites in the striatum
Source: eLife journal article supplement (doi:10.7554/elife.83018), 2022-12-29
Supplement: supp [file elife_poa_e83018_Source_data_table.xlsx]

## Sheet: Fig.1-SD1 peptides control
Figure 1 - Source Data 1
peptide count in control
reference	Gene Symbol	Annotation	RIMPPCP-1	RIMPPCP-2	RIMPPCP-3	RIMPPCP-4	ELKS2beta-1	ELKS2beta-2	ELKS2beta-3	ELKS2beta-4	CaVbeta4- 1	CaVbeta4- 2	CaVbeta4- 3	CaVbeta4- 4	BirA- tdTomato- 1	BirA- tdTomato- 2	BirA- tdTomato- 3	BirA- tdTomato- 4
tr|Q9D9G7|Q9D9G7_MOUSE	1700074P13Rik	1700074P13Rik protein OS=Mus musculus GN=1700074P13Rik PE=2 SV=1	0	0	0	0	0	1	0	0	1	0	0	0	0	0	0	0
tr|Q9CPN9|Q9CPN9_MOUSE	2210010C04Rik	Putative uncharacterized protein OS=Mus musculus GN=2210010C04Rik PE=1 SV=1	1	2	0	1	1	2	1	1	1	1	0	0	2	0	1	1
tr|A0A097PUD0|A0A097PUD0_MOUSE	A0A097PUD0	Anti-dectin-1 15E2 light chain OS=Mus musculus PE=2 SV=1	0	0	0	4	0	1	2	0	1	0	3	0	0	0	0	0
sp|Q6GQT1|A2MG_MOUSE	A2m	Alpha-2-macroglobulin-P OS=Mus musculus GN=A2m PE=2 SV=2	0	0	0	0	0	0	0	0	2	0	0	0	0	0	0	0
sp|Q3UHJ0|AAK1_MOUSE	Aak1	AP2-associated protein kinase 1 OS=Mus musculus GN=Aak1 PE=1 SV=2	0	12	21	25	2	17	12	23	12	4	14	17	5	11	16	21
sp|Q8R0P4|AAMDC_MOUSE	Aamdc	Mth938 domain-containing protein OS=Mus musculus GN=Aamdc PE=1 SV=1	0	4	2	4	1	0	4	0	0	0	4	2	0	0	3	3
sp|Q8BGQ7|SYAC_MOUSE	Aars	Alanine--tRNA ligase, cytoplasmic OS=Mus musculus GN=Aars PE=1 SV=1	0	0	1	0	0	1	0	0	0	0	0	0	0	0	1	0
sp|P61922|GABT_MOUSE	Abat	4-aminobutyrate aminotransferase, mitochondrial OS=Mus musculus GN=Abat PE=1 SV=1	2	17	17	10	2	9	8	18	7	5	11	7	4	6	11	10
sp|Q61102|ABCB7_MOUSE	Abcb7	ATP-binding cassette sub-family B member 7, mitochondrial OS=Mus musculus GN=Abcb7 PE=1 SV=3	0	0	0	0	0	0	0	0	0	0	0	0	0	0	1	0
sp|Q9CXJ4|ABCB8_MOUSE	Abcb8	ATP-binding cassette sub-family B member 8, mitochondrial OS=Mus musculus GN=Abcb8 PE=1 SV=1	0	0	0	2	1	3	0	0	1	1	0	0	0	0	1	0
sp|P55096|ABCD3_MOUSE	Abcd3	ATP-binding cassette sub-family D member 3 OS=Mus musculus GN=Abcd3 PE=1 SV=2	0	0	0	1	0	0	0	0	0	0	0	0	0	0	0	0
sp|P61222|ABCE1_MOUSE	Abce1	ATP-binding cassette sub-family E member 1 OS=Mus musculus GN=Abce1 PE=1 SV=1	0	0	0	0	0	1	0	0	0	0	0	0	0	0	0	0
sp|Q9Z1Q2|ABHGA_MOUSE	Abhd16a	Protein ABHD16A OS=Mus musculus GN=Abhd16a PE=1 SV=3	0	0	2	3	0	0	0	1	0	0	0	2	0	0	0	0
sp|Q91ZH7|ABHD3_MOUSE	Abhd3	Phospholipase ABHD3 OS=Mus musculus GN=Abhd3 PE=1 SV=1	0	0	0	0	0	0	1	0	0	0	0	0	0	0	0	0
sp|Q8R2Y0|ABHD6_MOUSE	Abhd6	Monoacylglycerol lipase ABHD6 OS=Mus musculus GN=Abhd6 PE=1 SV=1	0	0	1	1	0	0	1	0	0	0	1	0	0	0	0	2
sp|Q8CBW3|ABI1_MOUSE	Abi1	Abl interactor 1 OS=Mus musculus GN=Abi1 PE=1 SV=3	0	3	0	0	0	3	0	0	0	0	0	0	0	0	0	0
tr|A0A087WPE6|A0A087WPE6_MOUSE	Abi2	Abl interactor 2 (Fragment) OS=Mus musculus GN=Abi2 PE=1 SV=1	0	1	0	0	0	1	0	0	0	0	0	0	0	0	0	0
sp|Q5SSL4|ABR_MOUSE	Abr	Active breakpoint cluster region-related protein OS=Mus musculus GN=Abr PE=1 SV=1	1	0	4	6	0	0	1	4	0	0	3	5	1	0	5	6
sp|Q9QYL7|ABT1_MOUSE	Abt1	Activator of basal transcription 1 OS=Mus musculus GN=Abt1 PE=2 SV=1	0	0	0	0	0	0	0	0	0	0	1	0	0	0	0	0
sp|Q921H8|THIKA_MOUSE	Acaa1a	3-ketoacyl-CoA thiolase A, peroxisomal OS=Mus musculus GN=Acaa1a PE=1 SV=1	0	2	0	0	0	1	0	0	0	0	0	0	0	0	0	0
sp|Q8BWT1|THIM_MOUSE	Acaa2	3-ketoacyl-CoA thiolase, mitochondrial OS=Mus musculus GN=Acaa2 PE=1 SV=3	0	2	0	0	0	5	0	0	0	0	0	0	0	0	0	0
sp|Q5SWU9|ACACA_MOUSE	Acaca	Acetyl-CoA carboxylase 1 OS=Mus musculus GN=Acaca PE=1 SV=1	1	0	4	4	1	1	1	3	0	0	2	4	4	0	4	3
sp|E9Q4Z2|ACACB_MOUSE	Acacb	Acetyl-CoA carboxylase 2 OS=Mus musculus GN=Acacb PE=1 SV=1	0	0	2	3	0	3	0	0	4	1	2	2	1	0	1	1
sp|Q9D7B6|ACAD8_MOUSE	Acad8	Isobutyryl-CoA dehydrogenase, mitochondrial OS=Mus musculus GN=Acad8 PE=1 SV=2	0	0	0	0	0	0	1	1	1	0	1	0	0	2	1	0
sp|Q8JZN5|ACAD9_MOUSE	Acad9	Acyl-CoA dehydrogenase family member 9, mitochondrial OS=Mus musculus GN=Acad9 PE=1 SV=2	0	0	3	0	0	0	0	0	0	0	0	1	0	0	0	0
sp|P51174|ACADL_MOUSE	Acadl	Long-chain specific acyl-CoA dehydrogenase, mitochondrial OS=Mus musculus GN=Acadl PE=1 SV=2	1	0	4	3	0	8	3	4	0	0	2	5	0	0	4	4
sp|P45952|ACADM_MOUSE	Acadm	Medium-chain specific acyl-CoA dehydrogenase, mitochondrial OS=Mus musculus GN=Acadm PE=1 SV=1	0	0	0	0	0	4	0	0	0	0	0	0	0	0	0	0
sp|Q07417|ACADS_MOUSE	Acads	Short-chain specific acyl-CoA dehydrogenase, mitochondrial OS=Mus musculus GN=Acads PE=1 SV=2	0	1	0	0	0	0	0	0	0	0	0	0	0	0	0	0
sp|Q9DBL1|ACDSB_MOUSE	Acadsb	Short/branched chain specific acyl-CoA dehydrogenase, mitochondrial OS=Mus musculus GN=Acadsb PE=1 SV=1	0	0	0	1	0	0	0	1	0	0	0	0	0	0	0	0
sp|Q8QZT1|THIL_MOUSE	Acat1	Acetyl-CoA acetyltransferase, mitochondrial OS=Mus musculus GN=Acat1 PE=1 SV=1	4	8	13	13	3	28	8	8	14	2	8	9	2	8	10	11
sp|Q8CAY6|THIC_MOUSE	Acat2	Acetyl-CoA acetyltransferase, cytosolic OS=Mus musculus GN=Acat2 PE=1 SV=2	0	0	0	0	0	0	0	0	0	0	0	0	0	0	1	3
sp|Q8BMP6|GCP60_MOUSE	Acbd3	Golgi resident protein GCP60 OS=Mus musculus GN=Acbd3 PE=1 SV=3	0	0	0	0	1	0	0	0	0	0	0	0	0	0	0	0
sp|P21836|ACES_MOUSE	Ache	Acetylcholinesterase OS=Mus musculus GN=Ache PE=1 SV=1	0	0	0	2	0	2	0	0	0	0	1	0	1	1	0	0
sp|Q91V92|ACLY_MOUSE	Acly	ATP-citrate synthase OS=Mus musculus GN=Acly PE=1 SV=1	3	3	11	10	2	11	5	9	6	0	9	5	5	0	15	11
sp|P28271|ACOC_MOUSE	Aco1	Cytoplasmic aconitate hydratase OS=Mus musculus GN=Aco1 PE=1 SV=3	0	0	2	0	0	0	0	2	0	0	0	0	0	0	0	0
sp|Q99KI0|ACON_MOUSE	Aco2	Aconitate hydratase, mitochondrial OS=Mus musculus GN=Aco2 PE=1 SV=1	9	26	26	30	4	38	21	26	15	5	26	26	12	16	26	28
sp|Q32MW3|ACO10_MOUSE	Acot10	Acyl-coenzyme A thioesterase 10, mitochondrial OS=Mus musculus GN=Acot10 PE=2 SV=1	0	0	2	2	0	0	0	2	0	0	0	0	0	0	0	1
sp|Q8VHQ9|ACO11_MOUSE	Acot11	Acyl-coenzyme A thioesterase 11 OS=Mus musculus GN=Acot11 PE=1 SV=1	0	0	1	0	0	0	0	0	0	0	0	0	0	0	0	0
sp|Q9CQR4|ACO13_MOUSE	Acot13	Acyl-coenzyme A thioesterase 13 OS=Mus musculus GN=Acot13 PE=1 SV=1	1	5	2	3	1	4	1	2	1	2	2	2	0	0	2	4
sp|Q9QYR9|ACOT2_MOUSE	Acot2	Acyl-coenzyme A thioesterase 2, mitochondrial OS=Mus musculus GN=Acot2 PE=1 SV=2	0	0	0	1	0	0	0	1	0	0	0	0	0	0	0	0
sp|Q91V12|BACH_MOUSE	Acot7	Cytosolic acyl coenzyme A thioester hydrolase OS=Mus musculus GN=Acot7 PE=1 SV=2	13	11	10	12	10	9	6	14	8	5	8	9	9	13	10	10
sp|Q9R0X4|ACOT9_MOUSE	Acot9	Acyl-coenzyme A thioesterase 9, mitochondrial OS=Mus musculus GN=Acot9 PE=1 SV=1	0	0	1	0	0	0	0	1	0	1	0	0	0	0	0	0
sp|Q9D358|PPAC_MOUSE	Acp1	Low molecular weight phosphotyrosine protein phosphatase OS=Mus musculus GN=Acp1 PE=1 SV=3	1	2	1	1	0	2	2	1	1	0	1	1	0	0	1	2
sp|Q99PU5|ACBG1_MOUSE	Acsbg1	Long-chain-fatty-acid--CoA ligase ACSBG1 OS=Mus musculus GN=Acsbg1 PE=1 SV=1	3	4	9	5	0	7	4	7	3	3	4	6	0	0	3	5
sp|Q8VCW8|ACSF2_MOUSE	Acsf2	Acyl-CoA synthetase family member 2, mitochondrial OS=Mus musculus GN=Acsf2 PE=1 SV=1	0	1	3	4	0	2	0	5	0	1	2	1	0	2	2	1
sp|P41216|ACSL1_MOUSE	Acsl1	Long-chain-fatty-acid--CoA ligase 1 OS=Mus musculus GN=Acsl1 PE=1 SV=2	0	0	0	0	0	0	0	3	0	0	3	0	0	0	0	0
sp|Q9CZW4|ACSL3_MOUSE	Acsl3	Long-chain-fatty-acid--CoA ligase 3 OS=Mus musculus GN=Acsl3 PE=1 SV=2	0	0	1	2	0	0	3	3	2	0	1	2	0	0	1	2
sp|Q91WC3|ACSL6_MOUSE	Acsl6	Long-chain-fatty-acid--CoA ligase 6 OS=Mus musculus GN=Acsl6 PE=1 SV=1	1	3	5	4	0	2	0	9	1	1	3	2	1	0	6	5
sp|Q99NB1|ACS2L_MOUSE	Acss1	Acetyl-coenzyme A synthetase 2-like, mitochondrial OS=Mus musculus GN=Acss1 PE=1 SV=1	0	0	0	2	0	0	0	0	0	0	0	0	0	0	0	0
sp|Q9QXG4|ACSA_MOUSE	Acss2	Acetyl-coenzyme A synthetase, cytoplasmic OS=Mus musculus GN=Acss2 PE=1 SV=2	0	0	0	1	0	0	0	0	0	0	0	0	0	0	0	0
sp|P62737|ACTA_MOUSE	Acta2	Actin, aortic smooth muscle OS=Mus musculus GN=Acta2 PE=1 SV=1	0	15	3	3	0	9	0	3	4	1	2	5	0	6	3	0
sp|P60710|ACTB_MOUSE	Actb	Actin, cytoplasmic 1 OS=Mus musculus GN=Actb PE=1 SV=1	43	145	34	35	49	94	39	36	29	34	31	36	61	49	35	42
sp|Q7TPR4|ACTN1_MOUSE	Actn1	Alpha-actinin-1 OS=Mus musculus GN=Actn1 PE=1 SV=1	0	0	0	0	0	0	0	0	0	1	0	0	0	0	0	0
sp|O88990|ACTN3_MOUSE	Actn3	Alpha-actinin-3 OS=Mus musculus GN=Actn3 PE=2 SV=1	0	10	0	0	0	0	0	0	0	0	0	0	0	0	0	0
sp|P57780|ACTN4_MOUSE	Actn4	Alpha-actinin-4 OS=Mus musculus GN=Actn4 PE=1 SV=1	0	8	0	1	0	2	0	1	1	0	0	0	0	0	0	0
sp|Q9QZB7|ARP10_MOUSE	Actr10	Actin-related protein 10 OS=Mus musculus GN=Actr10 PE=1 SV=2	0	0	0	0	0	1	0	0	0	0	0	0	0	0	0	0
sp|P61164|ACTZ_MOUSE	Actr1a	Alpha-centractin OS=Mus musculus GN=Actr1a PE=1 SV=1	0	1	1	2	2	4	0	2	0	0	1	3	0	0	0	2
sp|Q8R5C5|ACTY_MOUSE	Actr1b	Beta-centractin OS=Mus musculus GN=Actr1b PE=1 SV=1	1	1	3	5	0	12	0	4	0	0	3	2	1	0	4	3
sp|P61161|ARP2_MOUSE	Actr2	Actin-related protein 2 OS=Mus musculus GN=Actr2 PE=1 SV=1	0	7	4	5	0	11	4	7	1	2	2	3	0	1	2	5
sp|Q99JY9|ARP3_MOUSE	Actr3	Actin-related protein 3 OS=Mus musculus GN=Actr3 PE=1 SV=3	0	0	0	0	0	7	0	0	0	0	0	0	0	0	0	0
sp|Q641P0|ARP3B_MOUSE	Actr3b	Actin-related protein 3B OS=Mus musculus GN=Actr3b PE=1 SV=1	0	0	0	0	0	1	0	0	0	0	0	0	0	0	0	0
sp|Q9R1V4|ADA11_MOUSE	Adam11	Disintegrin and metalloproteinase domain-containing protein 11 OS=Mus musculus GN=Adam11 PE=1 SV=2	0	0	0	0	0	0	0	2	0	0	0	0	0	0	0	0
sp|Q9R1V6|ADA22_MOUSE	Adam22	Disintegrin and metalloproteinase domain-containing protein 22 OS=Mus musculus GN=Adam22 PE=1 SV=2	0	0	5	6	0	0	2	2	0	1	6	3	1	0	5	2
sp|Q9R1V7|ADA23_MOUSE	Adam23	Disintegrin and metalloproteinase domain-containing protein 23 OS=Mus musculus GN=Adam23 PE=1 SV=1	0	0	3	2	0	4	1	3	1	1	4	2	0	0	2	3
tr|Q8BVS1|Q8BVS1_MOUSE	Adap1	Centaurin, alpha 1, isoform CRA_a OS=Mus musculus GN=Adap1 PE=2 SV=1	0	0	0	0	0	0	0	2	0	0	0	0	0	0	0	0
sp|Q9D0L4|ADCK1_MOUSE	Adck1	Uncharacterized aarF domain-containing protein kinase 1 OS=Mus musculus GN=Adck1 PE=1 SV=1	0	0	0	1	0	0	0	0	0	0	0	0	0	0	0	0
sp|P84309|ADCY5_MOUSE	Adcy5	Adenylate cyclase type 5 OS=Mus musculus GN=Adcy5 PE=1 SV=2	0	1	8	9	2	2	4	9	3	0	5	5	1	2	9	7
sp|P51830|ADCY9_MOUSE	Adcy9	Adenylate cyclase type 9 OS=Mus musculus GN=Adcy9 PE=1 SV=1	0	0	0	0	0	1	0	0	0	0	1	0	0	0	0	0
sp|Q9QYC0|ADDA_MOUSE	Add1	Alpha-adducin OS=Mus musculus GN=Add1 PE=1 SV=2	13	17	17	15	2	11	14	21	4	4	13	13	6	7	14	17
sp|Q9QYB8|ADDB_MOUSE	Add2	Beta-adducin OS=Mus musculus GN=Add2 PE=1 SV=4	1	5	9	8	3	8	3	9	2	0	5	4	2	0	6	11
sp|Q9QYB5|ADDG_MOUSE	Add3	Gamma-adducin OS=Mus musculus GN=Add3 PE=1 SV=2	2	0	5	5	0	0	2	6	4	3	3	4	0	0	6	9
sp|E9Q4J9|AGRF2_MOUSE	Adgrf2	Adhesion G-protein coupled receptor F2 OS=Mus musculus GN=Adgrf2 PE=2 SV=1	1	0	0	0	0	0	0	0	0	0	0	0	0	0	0	0
sp|Q80TR1|AGRL1_MOUSE	Adgrl1	Adhesion G protein-coupled receptor L1 OS=Mus musculus GN=Adgrl1 PE=1 SV=2	0	0	1	3	0	0	0	1	0	0	1	0	0	0	0	0
sp|P28474|ADHX_MOUSE	Adh5	Alcohol dehydrogenase class-3 OS=Mus musculus GN=Adh5 PE=1 SV=3	1	0	0	0	0	0	0	0	2	0	0	0	0	0	0	0
sp|P55264|ADK_MOUSE	Adk	Adenosine kinase OS=Mus musculus GN=Adk PE=1 SV=2	0	0	1	0	0	0	0	1	0	0	0	0	0	0	1	1
sp|Q6PDY2|AEDO_MOUSE	Ado	2-aminoethanethiol dioxygenase OS=Mus musculus GN=Ado PE=1 SV=2	0	0	0	0	0	2	0	0	0	0	0	0	0	0	0	0
sp|Q9JKV1|ADRM1_MOUSE	Adrm1	Proteasomal ubiquitin receptor ADRM1 OS=Mus musculus GN=Adrm1 PE=1 SV=2	0	1	1	1	0	0	1	1	0	0	1	1	0	0	1	1
sp|P46664|PURA2_MOUSE	Adss	Adenylosuccinate synthetase isozyme 2 OS=Mus musculus GN=Adss PE=1 SV=2	0	0	0	1	0	2	1	1	0	0	0	0	0	0	0	2
sp|P28650|PURA1_MOUSE	Adssl1	Adenylosuccinate synthetase isozyme 1 OS=Mus musculus GN=Adssl1 PE=1 SV=2	0	3	0	0	0	1	0	0	0	0	0	0	0	0	0	0
sp|Q8JZQ2|AFG32_MOUSE	Afg3l2	AFG3-like protein 2 OS=Mus musculus GN=Afg3l2 PE=1 SV=1	0	0	0	0	0	2	0	0	0	0	0	0	0	0	1	0
sp|Q3UHD9|AGAP2_MOUSE	Agap2	Arf-GAP with GTPase, ANK repeat and PH domain-containing protein 2 OS=Mus musculus GN=Agap2 PE=1 SV=1	1	0	0	0	0	1	0	0	0	1	0	0	0	0	0	0
sp|Q8VHH5|AGAP3_MOUSE	Agap3	Arf-GAP with GTPase, ANK repeat and PH domain-containing protein 3 OS=Mus musculus GN=Agap3 PE=1 SV=1	0	1	3	0	0	0	1	0	1	0	1	0	0	0	0	0
sp|Q80WC7|AGFG2_MOUSE	Agfg2	Arf-GAP domain and FG repeat-containing protein 2 OS=Mus musculus GN=Agfg2 PE=1 SV=1	0	0	0	0	0	1	0	0	0	0	0	0	0	0	0	0
sp|Q9ESW4|AGK_MOUSE	Agk	Acylglycerol kinase, mitochondrial OS=Mus musculus GN=Agk PE=1 SV=1	0	0	1	0	0	7	0	1	0	0	0	0	1	0	1	0
sp|O35083|PLCA_MOUSE	Agpat1	1-acyl-sn-glycerol-3-phosphate acyltransferase alpha OS=Mus musculus GN=Agpat1 PE=1 SV=1	0	0	0	0	0	0	0	0	0	0	0	0	0	0	3	0
sp|Q9D517|PLCC_MOUSE	Agpat3	1-acyl-sn-glycerol-3-phosphate acyltransferase gamma OS=Mus musculus GN=Agpat3 PE=1 SV=2	0	0	0	0	0	0	0	2	0	0	0	0	1	0	3	0
sp|P50247|SAHH_MOUSE	Ahcy	Adenosylhomocysteinase OS=Mus musculus GN=Ahcy PE=1 SV=3	2	4	4	7	6	4	0	4	0	1	2	2	0	3	0	7
sp|Q80SW1|SAHH2_MOUSE	Ahcyl1	S-adenosylhomocysteine hydrolase-like protein 1 OS=Mus musculus GN=Ahcyl1 PE=1 SV=1	1	2	5	7	0	4	0	4	2	4	3	4	2	8	4	5
sp|Q68FL4|SAHH3_MOUSE	Ahcyl2	Putative adenosylhomocysteinase 3 OS=Mus musculus GN=Ahcyl2 PE=1 SV=1	5	2	7	6	3	6	6	7	11	2	6	6	5	5	5	8
sp|Q8K3E5|AHI1_MOUSE	Ahi1	Jouberin OS=Mus musculus GN=Ahi1 PE=1 SV=2	0	0	0	0	0	0	0	1	0	0	0	0	0	0	0	0
tr|E9Q616|E9Q616_MOUSE	Ahnak	AHNAK nucleoprotein (desmoyokin) OS=Mus musculus GN=Ahnak PE=1 SV=1	0	0	0	0	0	0	0	0	1	0	0	0	0	0	0	0
sp|Q8BK64|AHSA1_MOUSE	Ahsa1	Activator of 90 kDa heat shock protein ATPase homolog 1 OS=Mus musculus GN=Ahsa1 PE=1 SV=2	1	0	1	3	0	3	0	0	0	3	1	0	0	0	3	1
sp|Q9Z0X1|AIFM1_MOUSE	Aifm1	Apoptosis-inducing factor 1, mitochondrial OS=Mus musculus GN=Aifm1 PE=1 SV=1	1	3	4	5	0	4	2	6	2	2	4	2	2	1	3	4
sp|Q8R010|AIMP2_MOUSE	Aimp2	Aminoacyl tRNA synthase complex-interacting multifunctional protein 2 OS=Mus musculus GN=Aimp2 PE=1 SV=2	0	0	0	1	0	1	0	0	0	0	0	0	0	0	0	1
sp|Q9R0Y5|KAD1_MOUSE	Ak1	Adenylate kinase isoenzyme 1 OS=Mus musculus GN=Ak1 PE=1 SV=1	1	8	1	1	0	6	1	0	2	1	0	0	0	1	0	2
sp|Q9WTP7|KAD3_MOUSE	Ak3	GTP:AMP phosphotransferase AK3, mitochondrial OS=Mus musculus GN=Ak3 PE=1 SV=3	0	0	0	0	0	7	0	0	0	0	0	0	0	0	0	0
sp|Q9WTQ5|AKA12_MOUSE	Akap12	A-kinase anchor protein 12 OS=Mus musculus GN=Akap12 PE=1 SV=1	0	0	0	0	0	0	0	0	1	1	0	0	0	0	0	0
sp|O54931|AKAP2_MOUSE	Akap2	A-kinase anchor protein 2 OS=Mus musculus GN=Akap2 PE=1 SV=3	0	0	0	0	0	1	0	0	0	0	0	0	0	0	0	0
sp|D3YVF0|AKAP5_MOUSE	Akap5	A-kinase anchor protein 5 OS=Mus musculus GN=Akap5 PE=1 SV=2	3	7	2	9	8	17	7	4	7	0	7	7	1	0	4	7
sp|Q7TN79|AKA7G_MOUSE	Akap7	A-kinase anchor protein 7 isoform gamma OS=Mus musculus GN=Akap7 PE=1 SV=2	0	0	0	0	0	2	0	0	0	0	0	0	0	0	0	0
sp|Q9DBR0|AKAP8_MOUSE	Akap8	A-kinase anchor protein 8 OS=Mus musculus GN=Akap8 PE=1 SV=1	1	0	0	0	0	0	0	0	0	0	0	0	0	0	0	0
sp|Q9JII6|AK1A1_MOUSE	Akr1a1	Alcohol dehydrogenase [NADP(+)] OS=Mus musculus GN=Akr1a1 PE=1 SV=3	0	5	1	2	0	1	0	1	0	0	0	0	0	3	1	1
sp|P45376|ALDR_MOUSE	Akr1b1	Aldose reductase OS=Mus musculus GN=Akr1b1 PE=1 SV=3	0	3	6	5	0	6	2	0	0	0	4	3	0	0	5	5
sp|Q64362|AKTIP_MOUSE	Aktip	AKT-interacting protein OS=Mus musculus GN=Aktip PE=1 SV=1	0	0	1	0	0	0	0	0	0	0	0	0	0	0	0	0
sp|P10518|HEM2_MOUSE	Alad	Delta-aminolevulinic acid dehydratase OS=Mus musculus GN=Alad PE=1 SV=1	0	0	0	0	0	2	0	0	0	0	0	0	0	0	0	0
sp|P07724|ALBU_MOUSE	Alb	Serum albumin OS=Mus musculus GN=Alb PE=1 SV=3	2	5	10	6	1	12	6	5	0	3	3	5	3	6	2	4
sp|Q61490|CD166_MOUSE	Alcam	CD166 antigen OS=Mus musculus GN=Alcam PE=1 SV=3	0	7	2	3	0	4	1	2	3	0	4	1	0	1	3	3
sp|Q9Z110|P5CS_MOUSE	Aldh18a1	Delta-1-pyrroline-5-carboxylate synthase OS=Mus musculus GN=Aldh18a1 PE=1 SV=2	0	0	0	0	0	0	0	0	0	0	0	0	0	0	1	0
sp|P24549|AL1A1_MOUSE	Aldh1a1	Retinal dehydrogenase 1 OS=Mus musculus GN=Aldh1a1 PE=1 SV=5	0	0	4	4	0	0	1	8	0	1	1	4	0	0	6	5
sp|Q8R0Y6|AL1L1_MOUSE	Aldh1l1	Cytosolic 10-formyltetrahydrofolate dehydrogenase OS=Mus musculus GN=Aldh1l1 PE=1 SV=1	0	2	7	7	0	5	2	9	0	0	4	6	0	0	5	5
sp|P47738|ALDH2_MOUSE	Aldh2	Aldehyde dehydrogenase, mitochondrial OS=Mus musculus GN=Aldh2 PE=1 SV=1	0	6	2	6	0	6	0	5	1	4	1	5	2	0	2	3
sp|Q8BWF0|SSDH_MOUSE	Aldh5a1	Succinate-semialdehyde dehydrogenase, mitochondrial OS=Mus musculus GN=Aldh5a1 PE=1 SV=1	0	10	6	6	0	8	3	9	3	2	4	7	3	2	4	11
sp|Q9EQ20|MMSA_MOUSE	Aldh6a1	Methylmalonate-semialdehyde dehydrogenase [acylating], mitochondrial OS=Mus musculus GN=Aldh6a1 PE=1 SV=1	0	1	0	0	0	5	0	0	0	0	0	0	0	0	0	2
sp|Q9JLJ2|AL9A1_MOUSE	Aldh9a1	4-trimethylaminobutyraldehyde dehydrogenase OS=Mus musculus GN=Aldh9a1 PE=1 SV=1	0	0	1	1	0	0	0	2	0	0	1	1	0	1	0	1
sp|P05064|ALDOA_MOUSE	Aldoa	Fructose-bisphosphate aldolase A OS=Mus musculus GN=Aldoa PE=1 SV=2	20	39	29	32	19	72	34	31	16	21	30	24	22	39	26	36
sp|P05063|ALDOC_MOUSE	Aldoc	Fructose-bisphosphate aldolase C OS=Mus musculus GN=Aldoc PE=1 SV=4	10	18	16	17	8	45	15	17	10	5	11	16	8	10	18	17
sp|Q9DBE8|ALG2_MOUSE	Alg2	Alpha-1,3/1,6-mannosyltransferase ALG2 OS=Mus musculus GN=Alg2 PE=1 SV=2	0	0	0	3	0	0	0	1	1	0	1	0	0	0	3	0
sp|Q8VHG2|AMOT_MOUSE	Amot	Angiomotin OS=Mus musculus GN=Amot PE=1 SV=3	0	0	0	0	0	0	0	0	0	0	0	1	0	0	0	0
sp|Q7TQF7|AMPH_MOUSE	Amph	Amphiphysin OS=Mus musculus GN=Amph PE=1 SV=1	0	3	1	1	0	16	2	0	0	0	1	0	0	1	0	1
sp|Q8C8R3|ANK2_MOUSE	Ank2	Ankyrin-2 OS=Mus musculus GN=Ank2 PE=1 SV=2	20	35	40	33	20	27	29	31	28	21	36	36	24	29	32	30
sp|G5E8K5|ANK3_MOUSE	Ank3	Ankyrin-3 OS=Mus musculus GN=Ank3 PE=1 SV=1	1	1	14	9	0	7	6	9	2	3	3	4	1	3	10	11
sp|Q810B6|ANFY1_MOUSE	Ankfy1	Rabankyrin-5 OS=Mus musculus GN=Ankfy1 PE=1 SV=2	0	0	0	1	0	0	0	0	0	0	0	0	0	0	1	0
sp|Q8BIZ1|ANS1B_MOUSE	Anks1b	Ankyrin repeat and sterile alpha motif domain-containing protein 1B OS=Mus musculus GN=Anks1b PE=1 SV=3	0	0	2	3	0	1	0	4	0	0	1	0	0	0	3	3
sp|Q8K298|ANLN_MOUSE	Anln	Anillin OS=Mus musculus GN=Anln PE=1 SV=2	0	0	2	1	0	0	0	0	0	0	0	0	0	0	0	0
sp|P10107|ANXA1_MOUSE	Anxa1	Annexin A1 OS=Mus musculus GN=Anxa1 PE=1 SV=2	0	0	0	1	0	0	1	0	0	0	0	0	0	0	0	0
sp|P07356|ANXA2_MOUSE	Anxa2	Annexin A2 OS=Mus musculus GN=Anxa2 PE=1 SV=2	0	0	0	0	0	0	0	0	0	0	0	0	0	1	0	0
sp|P48036|ANXA5_MOUSE	Anxa5	Annexin A5 OS=Mus musculus GN=Anxa5 PE=1 SV=1	0	6	0	1	0	12	3	0	0	0	0	0	5	0	0	3
sp|P14824|ANXA6_MOUSE	Anxa6	Annexin A6 OS=Mus musculus GN=Anxa6 PE=1 SV=3	0	0	0	0	0	1	0	0	0	0	0	0	0	0	0	0
sp|Q07076|ANXA7_MOUSE	Anxa7	Annexin A7 OS=Mus musculus GN=Anxa7 PE=1 SV=2	0	0	0	0	0	1	0	0	0	0	0	0	0	0	0	0
sp|O35643|AP1B1_MOUSE	Ap1b1	AP-1 complex subunit beta-1 OS=Mus musculus GN=Ap1b1 PE=1 SV=2	0	0	0	2	2	2	0	0	1	0	1	0	1	0	2	0
sp|P22892|AP1G1_MOUSE	Ap1g1	AP-1 complex subunit gamma-1 OS=Mus musculus GN=Ap1g1 PE=1 SV=3	1	2	2	2	0	2	0	2	1	2	0	0	0	1	1	0
sp|P35585|AP1M1_MOUSE	Ap1m1	AP-1 complex subunit mu-1 OS=Mus musculus GN=Ap1m1 PE=1 SV=3	0	0	3	3	0	0	0	3	0	0	0	0	0	0	3	5
sp|P61967|AP1S1_MOUSE	Ap1s1	AP-1 complex subunit sigma-1A OS=Mus musculus GN=Ap1s1 PE=1 SV=1	0	0	0	0	2	11	0	0	4	0	2	0	0	0	0	0
sp|Q9DB50|AP1S2_MOUSE	Ap1s2	AP-1 complex subunit sigma-2 OS=Mus musculus GN=Ap1s2 PE=1 SV=1	0	0	0	0	1	0	0	0	0	0	0	0	4	0	0	0
sp|P17426|AP2A1_MOUSE	Ap2a1	AP-2 complex subunit alpha-1 OS=Mus musculus GN=Ap2a1 PE=1 SV=1	4	10	21	19	14	10	14	23	16	4	13	13	7	6	15	18
sp|P17427|AP2A2_MOUSE	Ap2a2	AP-2 complex subunit alpha-2 OS=Mus musculus GN=Ap2a2 PE=1 SV=2	6	11	23	21	5	12	11	25	8	5	16	19	5	7	19	19
sp|Q9DBG3|AP2B1_MOUSE	Ap2b1	AP-2 complex subunit beta OS=Mus musculus GN=Ap2b1 PE=1 SV=1	6	20	23	24	9	26	18	23	24	8	19	20	16	15	22	21
sp|P84091|AP2M1_MOUSE	Ap2m1	AP-2 complex subunit mu OS=Mus musculus GN=Ap2m1 PE=1 SV=1	5	16	13	15	4	14	7	12	7	2	11	11	16	16	12	14
sp|P62743|AP2S1_MOUSE	Ap2s1	AP-2 complex subunit sigma OS=Mus musculus GN=Ap2s1 PE=1 SV=1	0	1	7	6	0	2	0	4	0	1	0	6	3	0	5	5
sp|Q9JME5|AP3B2_MOUSE	Ap3b2	AP-3 complex subunit beta-2 OS=Mus musculus GN=Ap3b2 PE=1 SV=2	0	2	7	8	0	11	4	4	2	5	3	4	6	1	4	5
sp|O54774|AP3D1_MOUSE	Ap3d1	AP-3 complex subunit delta-1 OS=Mus musculus GN=Ap3d1 PE=1 SV=1	4	1	12	11	3	7	6	15	8	4	7	14	3	4	13	13
sp|Q9JKC8|AP3M1_MOUSE	Ap3m1	AP-3 complex subunit mu-1 OS=Mus musculus GN=Ap3m1 PE=1 SV=1	0	0	0	0	0	0	1	0	0	0	0	0	0	0	0	0
sp|Q8R2R9|AP3M2_MOUSE	Ap3m2	AP-3 complex subunit mu-2 OS=Mus musculus GN=Ap3m2 PE=1 SV=1	0	0	3	1	0	5	0	0	0	0	0	2	0	0	2	3
sp|Q9DCR2|AP3S1_MOUSE	Ap3s1	AP-3 complex subunit sigma-1 OS=Mus musculus GN=Ap3s1 PE=1 SV=2	0	2	2	2	0	2	0	2	0	0	0	1	0	0	0	1
sp|Q8R146|APEH_MOUSE	Apeh	Acylamino-acid-releasing enzyme OS=Mus musculus GN=Apeh PE=1 SV=3	0	0	0	0	0	0	0	1	0	0	0	0	0	0	0	0
sp|P28352|APEX1_MOUSE	Apex1	DNA-(apurinic or apyrimidinic site) lyase OS=Mus musculus GN=Apex1 PE=1 SV=2	0	3	2	1	0	0	2	2	0	0	2	1	0	0	3	1
sp|Q9D7N9|APMAP_MOUSE	Apmap	Adipocyte plasma membrane-associated protein OS=Mus musculus GN=Apmap PE=1 SV=1	0	0	0	0	0	2	0	0	0	0	0	0	0	0	0	0
sp|Q00623|APOA1_MOUSE	Apoa1	Apolipoprotein A-I OS=Mus musculus GN=Apoa1 PE=1 SV=2	0	0	0	0	0	5	0	0	0	0	0	0	0	0	0	0
sp|P08226|APOE_MOUSE	Apoe	Apolipoprotein E OS=Mus musculus GN=Apoe PE=1 SV=2	0	0	0	0	0	4	0	0	0	0	0	0	0	0	0	0
sp|Q9DCZ4|MIC26_MOUSE	Apoo	MICOS complex subunit Mic26 OS=Mus musculus GN=Apoo PE=1 SV=2	1	1	3	4	2	2	3	2	1	0	2	1	2	0	1	1
sp|Q78IK4|MIC27_MOUSE	Apool	MICOS complex subunit Mic27 OS=Mus musculus GN=Apool PE=1 SV=1	1	0	1	1	0	0	0	2	0	0	1	1	1	0	0	1
sp|P12023|A4_MOUSE	App	Amyloid beta A4 protein OS=Mus musculus GN=App PE=1 SV=3	0	1	0	0	0	0	0	0	0	0	0	0	0	0	0	0
sp|Q8K3H0|DP13A_MOUSE	Appl1	DCC-interacting protein 13-alpha OS=Mus musculus GN=Appl1 PE=1 SV=1	0	0	0	0	0	3	0	0	0	0	3	0	0	0	0	0
sp|P55088|AQP4_MOUSE	Aqp4	Aquaporin-4 OS=Mus musculus GN=Aqp4 PE=1 SV=2	2	5	1	3	1	0	2	2	0	0	3	2	0	0	3	2
sp|Q5XJY5|COPD_MOUSE	Arcn1	Coatomer subunit delta OS=Mus musculus GN=Arcn1 PE=1 SV=2	0	0	0	0	0	2	0	1	0	0	0	0	0	0	0	0
sp|Q8BSL7|ARF2_MOUSE	Arf2	ADP-ribosylation factor 2 OS=Mus musculus GN=Arf2 PE=1 SV=2	4	20	8	7	4	20	7	6	6	4	7	7	5	3	6	8
sp|P61750|ARF4_MOUSE	Arf4	ADP-ribosylation factor 4 OS=Mus musculus GN=Arf4 PE=1 SV=2	0	0	2	0	0	0	0	2	0	1	1	0	0	0	1	2
sp|P84084|ARF5_MOUSE	Arf5	ADP-ribosylation factor 5 OS=Mus musculus GN=Arf5 PE=1 SV=2	1	15	11	8	3	18	6	9	10	4	10	7	5	5	8	9
sp|P62331|ARF6_MOUSE	Arf6	ADP-ribosylation factor 6 OS=Mus musculus GN=Arf6 PE=1 SV=2	0	2	3	2	0	1	1	2	0	0	1	4	0	0	2	4
sp|Q9EPJ9|ARFG1_MOUSE	Arfgap1	ADP-ribosylation factor GTPase-activating protein 1 OS=Mus musculus GN=Arfgap1 PE=1 SV=2	0	2	1	1	0	0	1	2	0	0	0	1	0	0	1	0
sp|A2A5R2|BIG2_MOUSE	Arfgef2	Brefeldin A-inhibited guanine nucleotide-exchange protein 2 OS=Mus musculus GN=Arfgef2 PE=1 SV=1	0	0	0	0	0	0	0	0	0	0	0	0	0	0	1	0
sp|Q5FWK3|RHG01_MOUSE	Arhgap1	Rho GTPase-activating protein 1 OS=Mus musculus GN=Arhgap1 PE=1 SV=1	0	0	1	1	0	4	0	2	0	0	0	0	0	0	1	1
sp|Q6ZQ82|RHG26_MOUSE	Arhgap26	Rho GTPase-activating protein 26 OS=Mus musculus GN=Arhgap26 PE=1 SV=3	0	0	0	0	0	1	0	0	0	0	0	0	0	0	0	0
sp|Q811P8|RHG32_MOUSE	Arhgap32	Rho GTPase-activating protein 32 OS=Mus musculus GN=Arhgap32 PE=1 SV=2	0	0	0	0	0	1	0	0	0	0	0	0	0	0	0	0
sp|Q5SSM3|RHG44_MOUSE	Arhgap44	Rho GTPase-activating protein 44 OS=Mus musculus GN=Arhgap44 PE=1 SV=1	0	0	0	0	0	2	0	0	0	0	0	0	0	0	0	1
sp|Q99PT1|GDIR1_MOUSE	Arhgdia	Rho GDP-dissociation inhibitor 1 OS=Mus musculus GN=Arhgdia PE=1 SV=3	5	7	9	8	3	27	8	7	10	7	7	8	5	4	5	8
sp|Q61599|GDIR2_MOUSE	Arhgdib	Rho GDP-dissociation inhibitor 2 OS=Mus musculus GN=Arhgdib PE=1 SV=3	0	1	0	0	0	0	0	0	0	0	0	0	0	0	0	0
sp|P61211|ARL1_MOUSE	Arl1	ADP-ribosylation factor-like protein 1 OS=Mus musculus GN=Arl1 PE=1 SV=1	0	0	0	0	0	0	0	1	0	0	0	0	0	0	0	0
sp|Q9WUL7|ARL3_MOUSE	Arl3	ADP-ribosylation factor-like protein 3 OS=Mus musculus GN=Arl3 PE=1 SV=1	0	0	0	2	0	0	0	0	0	0	0	0	0	0	0	0
sp|Q8R5J9|PRAF3_MOUSE	Arl6ip5	PRA1 family protein 3 OS=Mus musculus GN=Arl6ip5 PE=1 SV=2	0	2	1	1	0	0	0	1	1	1	0	1	0	4	3	2
sp|Q8VEH3|ARL8A_MOUSE	Arl8a	ADP-ribosylation factor-like protein 8A OS=Mus musculus GN=Arl8a PE=1 SV=1	0	0	2	0	0	0	0	1	0	1	0	0	0	0	0	1
sp|Q9CQW2|ARL8B_MOUSE	Arl8b	ADP-ribosylation factor-like protein 8B OS=Mus musculus GN=Arl8b PE=1 SV=1	0	0	2	3	0	0	0	3	2	0	3	2	1	0	5	4
sp|Q9D7A8|ARMC1_MOUSE	Armc1	Armadillo repeat-containing protein 1 OS=Mus musculus GN=Armc1 PE=1 SV=1	0	4	0	0	0	0	0	0	0	0	0	0	0	0	0	0
sp|Q8BNU0|ARMC6_MOUSE	Armc6	Armadillo repeat-containing protein 6 OS=Mus musculus GN=Armc6 PE=1 SV=1	0	0	0	0	0	1	0	0	0	0	0	0	0	0	0	0
sp|Q9R0Q6|ARC1A_MOUSE	Arpc1a	Actin-related protein 2/3 complex subunit 1A OS=Mus musculus GN=Arpc1a PE=1 SV=1	0	3	5	5	2	2	5	7	7	0	4	8	7	2	9	6
sp|Q9CVB6|ARPC2_MOUSE	Arpc2	Actin-related protein 2/3 complex subunit 2 OS=Mus musculus GN=Arpc2 PE=1 SV=3	0	0	6	5	0	5	4	4	0	0	5	3	0	2	4	2
sp|Q9JM76|ARPC3_MOUSE	Arpc3	Actin-related protein 2/3 complex subunit 3 OS=Mus musculus GN=Arpc3 PE=1 SV=3	0	4	0	1	1	3	0	0	2	0	0	0	2	0	2	1
sp|P59999|ARPC4_MOUSE	Arpc4	Actin-related protein 2/3 complex subunit 4 OS=Mus musculus GN=Arpc4 PE=1 SV=3	2	7	5	3	1	12	6	6	4	1	5	3	2	2	2	4
sp|Q9CPW4|ARPC5_MOUSE	Arpc5	Actin-related protein 2/3 complex subunit 5 OS=Mus musculus GN=Arpc5 PE=1 SV=3	0	0	0	0	0	1	0	0	0	0	0	0	0	0	0	0
sp|Q9D898|ARP5L_MOUSE	Arpc5l	Actin-related protein 2/3 complex subunit 5-like protein OS=Mus musculus GN=Arpc5l PE=1 SV=1	0	1	0	0	0	7	1	0	0	0	0	0	0	0	0	0
sp|Q9D0A3|ARPIN_MOUSE	Arpin	Arpin OS=Mus musculus GN=Arpin PE=1 SV=1	0	0	0	0	0	1	0	0	0	0	0	0	0	0	0	0
sp|Q8BWG8|ARRB1_MOUSE	Arrb1	Beta-arrestin-1 OS=Mus musculus GN=Arrb1 PE=1 SV=1	0	1	0	0	0	0	0	3	3	0	0	0	2	1	3	1
sp|Q9QWY8|ASAP1_MOUSE	Asap1	Arf-GAP with SH3 domain, ANK repeat and PH domain-containing protein 1 OS=Mus musculus GN=Asap1 PE=1 SV=2	0	1	0	0	0	0	0	0	0	0	0	0	0	0	0	0
tr|B2RRQ1|B2RRQ1_MOUSE	Asic2	Amiloride-sensitive cation channel 1, neuronal (Degenerin) OS=Mus musculus GN=Asic2 PE=2 SV=1	0	0	0	0	0	0	0	0	0	0	0	0	0	0	1	0
sp|Q61024|ASNS_MOUSE	Asns	Asparagine synthetase [glutamine-hydrolyzing] OS=Mus musculus GN=Asns PE=1 SV=3	0	0	0	0	0	2	0	2	0	0	0	0	0	0	0	0
sp|Q8VBT9|ASPC1_MOUSE	Aspscr1	Tether containing UBX domain for GLUT4 OS=Mus musculus GN=Aspscr1 PE=1 SV=1	0	0	1	0	0	0	0	0	0	0	0	0	0	0	0	0
sp|Q8C0M9|ASGL1_MOUSE	Asrgl1	Isoaspartyl peptidase/L-asparaginase OS=Mus musculus GN=Asrgl1 PE=1 SV=1	0	7	4	6	2	3	7	4	5	1	6	5	1	8	3	7
sp|P16460|ASSY_MOUSE	Ass1	Argininosuccinate synthase OS=Mus musculus GN=Ass1 PE=1 SV=1	0	3	3	2	0	5	0	2	0	2	3	1	2	0	1	2
sp|Q8K341|ATAT_MOUSE	Atat1	Alpha-tubulin N-acetyltransferase 1 OS=Mus musculus GN=Atat1 PE=1 SV=1	0	0	0	0	0	2	0	0	0	0	0	0	0	0	0	0
sp|Q8BHE3|ATCAY_MOUSE	Atcay	Caytaxin OS=Mus musculus GN=Atcay PE=1 SV=1	0	1	4	1	0	0	0	2	1	0	4	0	3	0	3	3
sp|Q9Z2A5|ATE1_MOUSE	Ate1	Arginyl-tRNA--protein transferase 1 OS=Mus musculus GN=Ate1 PE=1 SV=2	0	0	1	0	0	0	0	0	0	0	0	0	0	0	1	0
sp|Q9D906|ATG7_MOUSE	Atg7	Ubiquitin-like modifier-activating enzyme ATG7 OS=Mus musculus GN=Atg7 PE=1 SV=1	0	0	0	0	0	0	0	0	0	0	0	0	0	0	1	1
sp|Q9CWJ9|PUR9_MOUSE	Atic	Bifunctional purine biosynthesis protein PURH OS=Mus musculus GN=Atic PE=1 SV=2	0	0	0	0	0	0	0	0	0	0	0	0	1	0	0	0
sp|Q8BH66|ATLA1_MOUSE	Atl1	Atlastin-1 OS=Mus musculus GN=Atl1 PE=1 SV=1	0	1	4	3	0	1	1	5	0	0	2	2	0	0	1	2
sp|Q9Z1W8|AT12A_MOUSE	Atp12a	Potassium-transporting ATPase alpha chain 2 OS=Mus musculus GN=Atp12a PE=1 SV=3	7	8	4	7	6	16	4	8	2	3	5	7	6	6	7	7
sp|Q8VDN2|AT1A1_MOUSE	Atp1a1	Sodium/potassium-transporting ATPase subunit alpha-1 OS=Mus musculus GN=Atp1a1 PE=1 SV=1	45	36	43	40	48	74	42	42	31	34	45	39	68	60	35	34
sp|Q6PIE5|AT1A2_MOUSE	Atp1a2	Sodium/potassium-transporting ATPase subunit alpha-2 OS=Mus musculus GN=Atp1a2 PE=1 SV=1	23	41	31	34	27	60	27	35	29	17	28	22	15	29	27	28
sp|Q6PIC6|AT1A3_MOUSE	Atp1a3	Sodium/potassium-transporting ATPase subunit alpha-3 OS=Mus musculus GN=Atp1a3 PE=1 SV=1	39	68	56	47	42	62	49	47	45	22	53	41	43	73	35	41
sp|Q9WV27|AT1A4_MOUSE	Atp1a4	Sodium/potassium-transporting ATPase subunit alpha-4 OS=Mus musculus GN=Atp1a4 PE=1 SV=3	4	14	4	7	13	10	5	5	31	3	3	4	9	8	4	5
sp|P14094|AT1B1_MOUSE	Atp1b1	Sodium/potassium-transporting ATPase subunit beta-1 OS=Mus musculus GN=Atp1b1 PE=1 SV=1	11	11	10	10	16	24	12	12	6	11	11	7	12	11	11	8
sp|P14231|AT1B2_MOUSE	Atp1b2	Sodium/potassium-transporting ATPase subunit beta-2 OS=Mus musculus GN=Atp1b2 PE=1 SV=2	1	2	3	2	2	4	4	2	2	1	1	2	3	3	3	3
sp|P97370|AT1B3_MOUSE	Atp1b3	Sodium/potassium-transporting ATPase subunit beta-3 OS=Mus musculus GN=Atp1b3 PE=1 SV=1	0	0	2	2	0	2	0	1	0	0	0	0	0	0	2	2
sp|Q8R429|AT2A1_MOUSE	Atp2a1	Sarcoplasmic/endoplasmic reticulum calcium ATPase 1 OS=Mus musculus GN=Atp2a1 PE=1 SV=1	0	2	0	0	0	0	0	0	0	0	0	0	0	0	0	0
sp|O55143|AT2A2_MOUSE	Atp2a2	Sarcoplasmic/endoplasmic reticulum calcium ATPase 2 OS=Mus musculus GN=Atp2a2 PE=1 SV=2	17	25	19	21	11	28	17	26	13	10	15	18	21	12	23	28
sp|Q64518|AT2A3_MOUSE	Atp2a3	Sarcoplasmic/endoplasmic reticulum calcium ATPase 3 OS=Mus musculus GN=Atp2a3 PE=1 SV=3	0	2	0	0	0	0	0	0	0	0	0	0	0	0	0	0
sp|G5E829|AT2B1_MOUSE	Atp2b1	Plasma membrane calcium-transporting ATPase 1 OS=Mus musculus GN=Atp2b1 PE=1 SV=1	9	20	16	26	12	24	14	21	15	10	16	17	14	14	18	18
sp|Q9R0K7|AT2B2_MOUSE	Atp2b2	Plasma membrane calcium-transporting ATPase 2 OS=Mus musculus GN=Atp2b2 PE=1 SV=2	16	18	19	27	17	35	15	22	31	9	18	20	8	21	23	24
tr|Q8C048|Q8C048_MOUSE	Atp2b3	Calcium-transporting ATPase OS=Mus musculus GN=Atp2b3 PE=1 SV=1	4	1	8	5	2	6	4	5	2	4	4	4	1	1	5	4
sp|Q6Q477|AT2B4_MOUSE	Atp2b4	Plasma membrane calcium-transporting ATPase 4 OS=Mus musculus GN=Atp2b4 PE=1 SV=1	10	21	22	20	13	23	18	24	14	25	23	22	19	15	16	21
sp|Q03265|ATPA_MOUSE	Atp5a1	ATP synthase subunit alpha, mitochondrial OS=Mus musculus GN=Atp5a1 PE=1 SV=1	72	111	61	61	56	148	58	71	35	47	47	53	45	55	48	49
sp|P56480|ATPB_MOUSE	Atp5b	ATP synthase subunit beta, mitochondrial OS=Mus musculus GN=Atp5b PE=1 SV=2	12	148	27	29	13	149	32	26	30	6	21	23	18	10	23	31
sp|Q91VR2|ATPG_MOUSE	Atp5c1	ATP synthase subunit gamma, mitochondrial OS=Mus musculus GN=Atp5c1 PE=1 SV=1	0	12	6	6	2	23	6	9	4	2	4	4	0	2	5	9
sp|Q9D3D9|ATPD_MOUSE	Atp5d	ATP synthase subunit delta, mitochondrial OS=Mus musculus GN=Atp5d PE=1 SV=1	0	2	0	0	0	2	1	1	0	0	0	1	0	0	0	0
sp|P56382|ATP5E_MOUSE	Atp5e	ATP synthase subunit epsilon, mitochondrial OS=Mus musculus GN=Atp5e PE=1 SV=2	0	0	2	2	0	1	0	0	0	0	0	2	0	0	2	2
sp|Q9CQQ7|AT5F1_MOUSE	Atp5f1	ATP synthase F(0) complex subunit B1, mitochondrial OS=Mus musculus GN=Atp5f1 PE=1 SV=1	0	10	6	4	4	8	1	8	0	5	0	1	0	0	3	5
tr|Q3U452|Q3U452_MOUSE	atp5f1a	ATP synthase subunit alpha OS=Mus musculus PE=2 SV=1	0	9	0	0	0	0	0	0	0	0	0	0	0	0	0	0
sp|Q9DCX2|ATP5H_MOUSE	Atp5h	ATP synthase subunit d, mitochondrial OS=Mus musculus GN=Atp5h PE=1 SV=3	2	6	2	4	0	4	3	2	2	2	5	4	0	3	3	4
sp|Q06185|ATP5I_MOUSE	Atp5i	ATP synthase subunit e, mitochondrial OS=Mus musculus GN=Atp5i PE=1 SV=2	1	2	1	3	1	2	2	2	1	0	3	1	1	6	1	2
sp|P97450|ATP5J_MOUSE	Atp5j	ATP synthase-coupling factor 6, mitochondrial OS=Mus musculus GN=Atp5j PE=1 SV=1	0	0	0	1	0	9	0	0	0	0	0	0	0	0	0	0
sp|P56135|ATPK_MOUSE	Atp5j2	ATP synthase subunit f, mitochondrial OS=Mus musculus GN=Atp5j2 PE=1 SV=3	4	7	5	6	2	10	2	5	1	1	2	3	2	4	3	0
sp|Q9CPQ8|ATP5L_MOUSE	Atp5l	ATP synthase subunit g, mitochondrial OS=Mus musculus GN=Atp5l PE=1 SV=1	0	5	2	4	0	5	1	3	1	2	1	2	8	3	3	3
sp|Q9DB20|ATPO_MOUSE	Atp5o	ATP synthase subunit O, mitochondrial OS=Mus musculus GN=Atp5o PE=1 SV=1	0	22	2	9	4	26	6	4	2	1	4	4	0	0	5	4
sp|Q9Z1G4|VPP1_MOUSE	Atp6v0a1	V-type proton ATPase 116 kDa subunit a isoform 1 OS=Mus musculus GN=Atp6v0a1 PE=1 SV=3	0	1	0	2	0	0	2	3	4	1	0	3	4	0	0	0
sp|P51863|VA0D1_MOUSE	Atp6v0d1	V-type proton ATPase subunit d 1 OS=Mus musculus GN=Atp6v0d1 PE=1 SV=2	0	2	2	0	1	3	0	0	0	0	0	1	0	0	0	0
sp|P50516|VATA_MOUSE	Atp6v1a	V-type proton ATPase catalytic subunit A OS=Mus musculus GN=Atp6v1a PE=1 SV=2	3	24	11	14	4	34	11	14	11	3	7	10	2	5	10	16
sp|P62814|VATB2_MOUSE	Atp6v1b2	V-type proton ATPase subunit B, brain isoform OS=Mus musculus GN=Atp6v1b2 PE=1 SV=1	11	20	20	14	6	15	15	21	9	5	12	12	15	8	13	11
sp|Q9Z1G3|VATC1_MOUSE	Atp6v1c1	V-type proton ATPase subunit C 1 OS=Mus musculus GN=Atp6v1c1 PE=1 SV=4	0	5	2	3	1	3	0	3	1	3	2	1	1	1	1	1
sp|P57746|VATD_MOUSE	Atp6v1d	V-type proton ATPase subunit D OS=Mus musculus GN=Atp6v1d PE=1 SV=1	0	4	0	0	0	4	0	0	0	0	0	0	0	0	0	0
sp|P50518|VATE1_MOUSE	Atp6v1e1	V-type proton ATPase subunit E 1 OS=Mus musculus GN=Atp6v1e1 PE=1 SV=2	0	7	0	2	0	14	2	1	0	0	0	0	1	0	0	0
sp|Q9D593|VATE2_MOUSE	Atp6v1e2	V-type proton ATPase subunit E 2 OS=Mus musculus GN=Atp6v1e2 PE=1 SV=1	0	3	0	0	1	8	1	0	0	0	0	0	0	0	0	0
sp|Q9D1K2|VATF_MOUSE	Atp6v1f	V-type proton ATPase subunit F OS=Mus musculus GN=Atp6v1f PE=1 SV=2	0	0	0	0	0	2	0	0	0	0	0	0	0	0	0	0
sp|Q9CR51|VATG1_MOUSE	Atp6v1g1	V-type proton ATPase subunit G 1 OS=Mus musculus GN=Atp6v1g1 PE=1 SV=3	0	2	0	0	0	0	0	0	0	1	0	0	0	1	0	0
sp|Q9WTT4|VATG2_MOUSE	Atp6v1g2	V-type proton ATPase subunit G 2 OS=Mus musculus GN=Atp6v1g2 PE=1 SV=1	0	1	0	1	2	4	2	0	1	2	0	0	0	0	0	0
sp|Q8BVE3|VATH_MOUSE	Atp6v1h	V-type proton ATPase subunit H OS=Mus musculus GN=Atp6v1h PE=1 SV=1	6	18	9	9	3	8	7	13	2	5	9	8	5	2	13	13
sp|Q64446|ATP7B_MOUSE	Atp7b	Copper-transporting ATPase 2 OS=Mus musculus GN=Atp7b PE=1 SV=2	0	0	0	0	0	0	0	0	0	0	0	0	0	0	1	0
sp|P70704|AT8A1_MOUSE	Atp8a1	Phospholipid-transporting ATPase IA OS=Mus musculus GN=Atp8a1 PE=1 SV=2	0	1	7	7	1	2	4	8	5	1	8	4	4	3	9	8
sp|O70228|ATP9A_MOUSE	Atp9a	Probable phospholipid-transporting ATPase IIA OS=Mus musculus GN=Atp9a PE=1 SV=3	0	0	0	0	0	0	0	0	0	0	0	1	0	0	2	0
sp|Q811I0|ATPF1_MOUSE	Atpaf1	ATP synthase mitochondrial F1 complex assembly factor 1 OS=Mus musculus GN=Atpaf1 PE=1 SV=1	0	0	0	1	0	0	0	1	0	0	0	0	0	0	0	1
sp|P28658|ATX10_MOUSE	Atxn10	Ataxin-10 OS=Mus musculus GN=Atxn10 PE=1 SV=2	0	2	0	0	0	1	0	0	0	0	0	0	0	0	0	0
sp|Q9JLZ3|AUHM_MOUSE	Auh	Methylglutaconyl-CoA hydratase, mitochondrial OS=Mus musculus GN=Auh PE=1 SV=1	0	2	0	0	0	0	0	0	0	0	0	0	0	0	0	0
sp|Q9DCJ7|AKIP_MOUSE	Aurkaip1	Aurora kinase A-interacting protein OS=Mus musculus GN=Aurkaip1 PE=2 SV=2	0	0	0	0	0	0	0	0	2	0	0	0	0	0	0	0
sp|Q80U56|AVL9_MOUSE	Avl9	Late secretory pathway protein AVL9 homolog OS=Mus musculus GN=Avl9 PE=1 SV=2	0	0	1	0	0	0	0	1	1	0	0	0	0	0	0	0
tr|H3BJ20|H3BJ20_MOUSE	B230118H07Rik	RIKEN cDNA B230118H07 gene (Fragment) OS=Mus musculus GN=B230118H07Rik PE=1 SV=1	0	0	0	0	0	0	0	0	0	0	0	0	0	0	0	1
sp|Q8K3W0|BABA2_MOUSE	Babam2	BRISC and BRCA1-A complex member 2 OS=Mus musculus GN=Babam2 PE=1 SV=2	0	0	0	1	0	0	0	1	0	0	0	0	0	0	0	0
sp|Q8BKX1|BAIP2_MOUSE	Baiap2	Brain-specific angiogenesis inhibitor 1-associated protein 2 OS=Mus musculus GN=Baiap2 PE=1 SV=2	0	0	0	0	0	3	0	0	0	0	0	0	0	0	0	0
sp|O54962|BAF_MOUSE	Banf1	Barrier-to-autointegration factor OS=Mus musculus GN=Banf1 PE=1 SV=1	0	4	0	0	0	0	0	0	0	0	0	0	0	0	0	0
sp|Q91XV3|BASP1_MOUSE	Basp1	Brain acid soluble protein 1 OS=Mus musculus GN=Basp1 PE=1 SV=3	5	7	6	9	3	28	18	2	4	4	5	10	2	4	4	3
sp|Q07813|BAX_MOUSE	Bax	Apoptosis regulator BAX OS=Mus musculus GN=Bax PE=1 SV=1	0	0	0	0	0	1	0	0	0	0	0	0	0	0	0	0
sp|Q61361|PGCB_MOUSE	Bcan	Brevican core protein OS=Mus musculus GN=Bcan PE=1 SV=2	0	0	2	5	0	2	3	3	3	0	4	3	2	0	2	4
sp|Q61334|BAP29_MOUSE	Bcap29	B-cell receptor-associated protein 29 OS=Mus musculus GN=Bcap29 PE=1 SV=1	0	0	2	0	0	0	0	0	0	0	0	0	0	0	0	1
sp|Q61335|BAP31_MOUSE	Bcap31	B-cell receptor-associated protein 31 OS=Mus musculus GN=Bcap31 PE=1 SV=4	0	0	1	1	1	2	1	1	0	0	1	1	1	0	1	1
sp|Q80YN3|BCAS1_MOUSE	Bcas1	Breast carcinoma-amplified sequence 1 homolog OS=Mus musculus GN=Bcas1 PE=1 SV=3	1	0	0	2	0	3	2	0	0	0	1	2	0	2	1	2
sp|Q8CCN5|BCAS3_MOUSE	Bcas3	Breast carcinoma-amplified sequence 3 homolog OS=Mus musculus GN=Bcas3 PE=1 SV=2	0	0	1	2	0	0	0	1	0	0	0	2	0	0	1	1
sp|P24288|BCAT1_MOUSE	Bcat1	Branched-chain-amino-acid aminotransferase, cytosolic OS=Mus musculus GN=Bcat1 PE=1 SV=2	0	0	0	0	0	2	0	0	0	0	0	0	0	0	0	0
sp|Q6PAJ1|BCR_MOUSE	Bcr	Breakpoint cluster region protein OS=Mus musculus GN=Bcr PE=1 SV=3	0	0	1	0	0	0	0	0	0	0	0	0	1	1	0	1
sp|Q80XN0|BDH_MOUSE	Bdh1	D-beta-hydroxybutyrate dehydrogenase, mitochondrial OS=Mus musculus GN=Bdh1 PE=1 SV=2	0	1	2	2	0	11	0	1	0	0	2	1	0	0	3	3
sp|O08539|BIN1_MOUSE	Bin1	Myc box-dependent-interacting protein 1 OS=Mus musculus GN=Bin1 PE=1 SV=1	2	6	2	3	0	9	2	1	2	1	0	3	0	0	1	3
sp|Q8VD62|CK068_MOUSE	Bles03	UPF0696 protein C11orf68 homolog OS=Mus musculus GN=Bles03 PE=1 SV=1	0	0	0	0	0	2	0	0	0	0	0	0	0	0	0	0
sp|Q8R016|BLMH_MOUSE	Blmh	Bleomycin hydrolase OS=Mus musculus GN=Blmh PE=1 SV=1	0	0	1	0	0	0	0	0	0	0	1	1	0	0	0	0
sp|Q9CY64|BIEA_MOUSE	Blvra	Biliverdin reductase A OS=Mus musculus GN=Blvra PE=1 SV=1	0	0	1	2	0	0	0	1	0	0	0	0	0	0	0	1
sp|Q8R164|BPHL_MOUSE	Bphl	Valacyclovir hydrolase OS=Mus musculus GN=Bphl PE=1 SV=1	0	0	0	0	0	2	0	0	0	0	0	0	0	0	0	0
sp|Q9Z0S1|BPNT1_MOUSE	Bpnt1	3'(2'),5'-bisphosphate nucleotidase 1 OS=Mus musculus GN=Bpnt1 PE=1 SV=2	0	0	2	2	0	0	0	1	0	0	0	1	0	0	0	2
sp|P28028|BRAF_MOUSE	Braf	Serine/threonine-protein kinase B-raf OS=Mus musculus GN=Braf PE=1 SV=3	0	0	2	2	0	0	0	2	1	0	0	0	0	0	1	2
sp|Q8BXV2|BRI3B_MOUSE	Bri3bp	BRI3-binding protein OS=Mus musculus GN=Bri3bp PE=1 SV=1	0	0	0	2	0	0	0	0	0	0	0	0	0	0	0	0
sp|Q5RJI5|BRSK1_MOUSE	Brsk1	Serine/threonine-protein kinase BRSK1 OS=Mus musculus GN=Brsk1 PE=1 SV=1	0	2	1	2	0	2	0	4	0	0	1	1	0	0	1	2
sp|Q69Z98|BRSK2_MOUSE	Brsk2	Serine/threonine-protein kinase BRSK2 OS=Mus musculus GN=Brsk2 PE=1 SV=2	0	0	1	1	0	0	0	0	0	0	0	0	0	0	1	1
sp|P18572|BASI_MOUSE	Bsg	Basigin OS=Mus musculus GN=Bsg PE=1 SV=2	0	0	0	0	0	7	0	1	0	1	0	0	0	1	0	0
sp|O88737|BSN_MOUSE	Bsn	Protein bassoon OS=Mus musculus GN=Bsn PE=1 SV=4	3	20	11	13	2	11	4	18	12	10	26	27	3	3	9	9
sp|Q9CQH7|BT3L4_MOUSE	Btf3l4	Transcription factor BTF3 homolog 4 OS=Mus musculus GN=Btf3l4 PE=1 SV=1	0	0	0	0	0	6	0	0	0	0	0	0	0	0	0	0
sp|Q9WVA3|BUB3_MOUSE	Bub3	Mitotic checkpoint protein BUB3 OS=Mus musculus GN=Bub3 PE=1 SV=2	1	0	0	0	0	0	0	0	2	0	0	0	0	0	0	0
sp|P98086|C1QA_MOUSE	C1qa	Complement C1q subcomponent subunit A OS=Mus musculus GN=C1qa PE=1 SV=2	1	0	0	0	0	0	0	0	1	1	0	0	0	2	0	0
sp|P14106|C1QB_MOUSE	C1qb	Complement C1q subcomponent subunit B OS=Mus musculus GN=C1qb PE=1 SV=2	0	0	0	0	0	0	0	0	4	0	0	0	0	0	0	0
tr|Q8R5L1|Q8R5L1_MOUSE	C1qbp	Complement component 1 Q subcomponent-binding protein, mitochondrial OS=Mus musculus GN=C1qbp PE=1 SV=1	0	3	1	1	0	4	0	0	1	0	0	2	0	0	0	0
sp|Q02105|C1QC_MOUSE	C1qc	Complement C1q subcomponent subunit C OS=Mus musculus GN=C1qc PE=1 SV=2	0	1	3	3	0	0	4	3	5	0	3	3	10	1	3	4
sp|Q8CG16|C1RA_MOUSE	C1ra	Complement C1r-A subcomponent OS=Mus musculus GN=C1ra PE=1 SV=1	0	0	0	0	0	0	0	1	0	0	1	1	0	0	1	0
sp|Q80X80|C2C2L_MOUSE	C2cd2l	Phospholipid transfer protein C2CD2L OS=Mus musculus GN=C2cd2l PE=1 SV=3	0	1	0	0	0	6	0	0	0	0	0	0	0	0	0	0
sp|Q5HZI2|C2C4C_MOUSE	C2cd4cC2CD4	C2 calcium-dependent domain-containing protein 4C OS=Mus musculus GN=C2cd4cC2CD4 family PE=1 SV=1	0	0	0	0	0	1	0	0	0	0	0	0	0	0	0	0
sp|P01027|CO3_MOUSE	C3	Complement C3 OS=Mus musculus GN=C3 PE=1 SV=3	0	0	0	0	0	0	0	0	0	0	0	0	4	0	0	0
sp|P01029|CO4B_MOUSE	C4b	Complement C4-B OS=Mus musculus GN=C4b PE=1 SV=3	0	0	0	0	1	0	0	0	1	0	0	0	0	0	0	0
sp|P06684|CO5_MOUSE	C5	Complement C5 OS=Mus musculus GN=C5 PE=1 SV=2	7	4	4	4	3	4	3	2	2	6	4	4	4	7	2	2
sp|Q8C3W1|CA198_MOUSE	CA198	Uncharacterized protein C1orf198 homolog OS=Mus musculus PE=1 SV=1	0	0	0	0	0	3	0	0	0	0	0	0	0	0	0	0
sp|P00920|CAH2_MOUSE	Ca2	Carbonic anhydrase 2 OS=Mus musculus GN=Ca2 PE=1 SV=4	3	12	9	7	4	11	5	10	10	2	8	8	5	8	7	7
sp|P97445|CAC1A_MOUSE	Cacna1a	Voltage-dependent P/Q-type calcium channel subunit alpha-1A OS=Mus musculus GN=Cacna1a PE=1 SV=2	0	0	0	0	0	0	0	0	0	0	3	1	0	0	0	0
sp|O55017|CAC1B_MOUSE	Cacna1b	Voltage-dependent N-type calcium channel subunit alpha-1B OS=Mus musculus GN=Cacna1b PE=1 SV=1	0	0	0	0	0	0	0	0	0	3	9	0	0	0	0	0
sp|Q61290|CAC1E_MOUSE	Cacna1e	Voltage-dependent R-type calcium channel subunit alpha-1E OS=Mus musculus GN=Cacna1e PE=1 SV=1	0	0	1	0	0	0	0	1	1	0	6	1	0	0	0	0
sp|Q02789|CAC1S_MOUSE	Cacna1s	Voltage-dependent L-type calcium channel subunit alpha-1S OS=Mus musculus GN=Cacna1s PE=1 SV=2	0	0	0	0	0	0	0	1	0	0	0	0	0	0	0	0
sp|Q8R3Z5|CACB1_MOUSE	Cacnb1	Voltage-dependent L-type calcium channel subunit beta-1 OS=Mus musculus GN=Cacnb1 PE=1 SV=1	0	0	0	0	0	0	0	0	6	0	13	6	0	0	0	0
sp|Q8R0S4|CACB4_MOUSE	Cacnb4	Voltage-dependent L-type calcium channel subunit beta-4 OS=Mus musculus GN=Cacnb4 PE=1 SV=2	0	0	0	0	0	1	0	0	11	13	35	16	0	0	0	0
sp|Q9JJV5|CCG3_MOUSE	Cacng3	Voltage-dependent calcium channel gamma-3 subunit OS=Mus musculus GN=Cacng3 PE=2 SV=2	0	1	0	0	0	0	0	0	0	0	0	0	1	0	0	0
sp|Q8VHW2|CCG8_MOUSE	Cacng8	Voltage-dependent calcium channel gamma-8 subunit OS=Mus musculus GN=Cacng8 PE=1 SV=1	3	1	4	8	1	2	8	5	6	3	7	6	2	0	3	3
sp|Q9CXW3|CYBP_MOUSE	Cacybp	Calcyclin-binding protein OS=Mus musculus GN=Cacybp PE=1 SV=1	0	2	0	0	0	0	0	1	0	0	0	0	0	0	0	0
sp|Q8R5M8|CADM1_MOUSE	Cadm1	Cell adhesion molecule 1 OS=Mus musculus GN=Cadm1 PE=1 SV=2	0	0	0	1	0	2	0	0	0	0	0	0	0	0	0	1
sp|Q8BLQ9|CADM2_MOUSE	Cadm2	Cell adhesion molecule 2 OS=Mus musculus GN=Cadm2 PE=1 SV=2	0	9	0	4	1	5	2	0	0	2	2	0	0	2	0	1
sp|Q99N28|CADM3_MOUSE	Cadm3	Cell adhesion molecule 3 OS=Mus musculus GN=Cadm3 PE=1 SV=1	1	0	5	5	0	6	0	2	0	0	0	3	0	1	0	3
sp|Q8R464|CADM4_MOUSE	Cadm4	Cell adhesion molecule 4 OS=Mus musculus GN=Cadm4 PE=1 SV=1	0	0	0	0	0	2	0	0	0	0	0	0	0	0	0	0
sp|Q80TJ1|CAPS1_MOUSE	Cadps	Calcium-dependent secretion activator 1 OS=Mus musculus GN=Cadps PE=1 SV=3	2	9	21	21	7	14	12	20	4	0	12	14	5	6	18	17
sp|Q8BYR5|CAPS2_MOUSE	Cadps2	Calcium-dependent secretion activator 2 OS=Mus musculus GN=Cadps2 PE=1 SV=2	1	4	4	3	0	2	2	2	2	3	3	1	3	9	2	3
sp|P12658|CALB1_MOUSE	Calb1	Calbindin OS=Mus musculus GN=Calb1 PE=1 SV=2	0	5	0	0	0	4	0	0	0	0	0	0	0	0	0	0
sp|Q08331|CALB2_MOUSE	Calb2	Calretinin OS=Mus musculus GN=Calb2 PE=1 SV=3	0	10	1	2	0	9	4	1	2	0	0	0	0	0	1	2
tr|Q8VCQ8|Q8VCQ8_MOUSE	Cald1	Caldesmon 1 OS=Mus musculus GN=Cald1 PE=1 SV=1	0	0	0	0	0	1	0	0	0	0	0	0	0	0	0	0
sp|P0DP27|CALM2_MOUSE	Calm2	Calmodulin-2 OS=Mus musculus GN=Calm2 PE=1 SV=1	0	25	0	2	2	24	10	0	0	0	1	3	0	7	1	0
sp|Q9D6P8|CALL3_MOUSE	Calml3	Calmodulin-like protein 3 OS=Mus musculus GN=Calml3 PE=2 SV=1	2	4	0	1	1	7	2	0	1	0	0	1	2	0	0	0
sp|P14211|CALR_MOUSE	Calr	Calreticulin OS=Mus musculus GN=Calr PE=1 SV=1	0	1	6	3	0	12	0	9	2	0	0	0	0	2	2	6
sp|P11798|KCC2A_MOUSE	Camk2a	Calcium/calmodulin-dependent protein kinase type II subunit alpha OS=Mus musculus GN=Camk2a PE=1 SV=2	4	38	19	21	7	20	15	19	21	10	17	17	6	4	15	14
sp|P28652|KCC2B_MOUSE	Camk2b	Calcium/calmodulin-dependent protein kinase type II subunit beta OS=Mus musculus GN=Camk2b PE=1 SV=2	3	9	15	13	2	12	9	10	5	0	9	9	6	3	13	10
sp|Q6PHZ2|KCC2D_MOUSE	Camk2d	Calcium/calmodulin-dependent protein kinase type II subunit delta OS=Mus musculus GN=Camk2d PE=1 SV=1	0	0	0	2	1	0	0	0	1	0	3	4	0	0	2	1
sp|Q923T9|KCC2G_MOUSE	Camk2g	Calcium/calmodulin-dependent protein kinase type II subunit gamma OS=Mus musculus GN=Camk2g PE=1 SV=1	0	6	4	2	0	0	0	5	1	0	4	5	3	4	4	5
sp|P08414|KCC4_MOUSE	Camk4	Calcium/calmodulin-dependent protein kinase type IV OS=Mus musculus GN=Camk4 PE=1 SV=2	0	1	0	0	0	5	0	2	0	0	0	0	0	0	0	0
sp|Q3UHL1|CAMKV_MOUSE	Camkv	CaM kinase-like vesicle-associated protein OS=Mus musculus GN=Camkv PE=1 SV=2	5	7	15	12	4	7	10	13	9	0	10	9	3	10	10	13
sp|Q80VC9|CAMP3_MOUSE	Camsap3	Calmodulin-regulated spectrin-associated protein 3 OS=Mus musculus GN=Camsap3 PE=1 SV=1	0	2	0	0	0	0	0	0	0	0	0	0	0	0	0	0
sp|Q6ZQ38|CAND1_MOUSE	Cand1	Cullin-associated NEDD8-dissociated protein 1 OS=Mus musculus GN=Cand1 PE=1 SV=2	0	1	7	6	0	5	4	9	2	2	3	5	8	0	4	6
sp|P35564|CALX_MOUSE	Canx	Calnexin OS=Mus musculus GN=Canx PE=1 SV=1	0	12	0	0	0	13	0	2	0	0	0	0	0	0	0	2
sp|P40124|CAP1_MOUSE	Cap1	Adenylyl cyclase-associated protein 1 OS=Mus musculus GN=Cap1 PE=1 SV=4	1	6	11	5	3	13	5	12	5	5	10	8	2	6	7	8
sp|Q9CYT6|CAP2_MOUSE	Cap2	Adenylyl cyclase-associated protein 2 OS=Mus musculus GN=Cap2 PE=1 SV=1	2	5	8	11	3	8	2	9	2	2	8	6	0	3	8	7
sp|O08688|CAN5_MOUSE	Capn5	Calpain-5 OS=Mus musculus GN=Capn5 PE=1 SV=1	0	0	0	0	0	1	0	0	0	0	0	0	0	0	0	0
sp|Q60865|CAPR1_MOUSE	Caprin1	Caprin-1 OS=Mus musculus GN=Caprin1 PE=1 SV=2	0	0	0	0	0	1	0	0	0	0	0	0	0	0	0	0
sp|P47753|CAZA1_MOUSE	Capza1	F-actin-capping protein subunit alpha-1 OS=Mus musculus GN=Capza1 PE=1 SV=4	0	0	0	0	0	4	0	0	0	1	0	0	0	0	0	0
sp|P47754|CAZA2_MOUSE	Capza2	F-actin-capping protein subunit alpha-2 OS=Mus musculus GN=Capza2 PE=1 SV=3	2	5	10	9	2	15	5	10	2	2	7	6	0	4	6	12
sp|P47757|CAPZB_MOUSE	Capzb	F-actin-capping protein subunit beta OS=Mus musculus GN=Capzb PE=1 SV=3	0	4	4	4	2	4	4	5	0	0	1	4	1	4	3	1
sp|O70589|CSKP_MOUSE	Cask	Peripheral plasma membrane protein CASK OS=Mus musculus GN=Cask PE=1 SV=2	0	0	0	0	0	0	0	0	0	0	0	0	0	0	0	1
sp|Q6P9K8|CSKI1_MOUSE	Caskin1	Caskin-1 OS=Mus musculus GN=Caskin1 PE=1 SV=2	0	2	0	0	0	1	0	0	0	0	0	0	0	1	0	0
sp|P24270|CATA_MOUSE	Cat	Catalase OS=Mus musculus GN=Cat PE=1 SV=4	2	0	0	0	0	0	0	0	0	1	0	0	0	0	0	0
sp|Q66L44|CBARP_MOUSE	Cbarp	Voltage-dependent calcium channel beta subunit-associated regulatory protein OS=Mus musculus GN=Cbarp PE=1 SV=4	0	0	0	0	0	0	0	0	6	1	4	1	0	0	0	0
sp|P48758|CBR1_MOUSE	Cbr1	Carbonyl reductase [NADPH] 1 OS=Mus musculus GN=Cbr1 PE=1 SV=3	1	8	1	1	0	8	1	3	0	0	1	1	0	0	2	3
sp|Q8K354|CBR3_MOUSE	Cbr3	Carbonyl reductase [NADPH] 3 OS=Mus musculus GN=Cbr3 PE=1 SV=1	0	0	0	0	0	2	0	0	0	0	0	0	0	0	0	0
sp|P83917|CBX1_MOUSE	Cbx1	Chromobox protein homolog 1 OS=Mus musculus GN=Cbx1 PE=1 SV=1	0	0	0	0	0	1	0	0	0	0	0	0	0	0	0	0
sp|P23198|CBX3_MOUSE	Cbx3	Chromobox protein homolog 3 OS=Mus musculus GN=Cbx3 PE=1 SV=2	0	1	0	0	0	0	0	0	0	0	0	0	0	0	0	0
sp|Q8VDP4|CCAR2_MOUSE	Ccar2	Cell cycle and apoptosis regulator protein 2 OS=Mus musculus GN=Ccar2 PE=1 SV=2	0	0	0	0	0	1	0	0	0	0	0	0	0	0	0	0
sp|Q8QZT2|CCSAP_MOUSE	Ccsap	Centriole, cilia and spindle-associated protein OS=Mus musculus GN=Ccsap PE=1 SV=1	0	0	0	0	0	0	0	0	0	0	0	0	2	0	0	0
sp|P80314|TCPB_MOUSE	Cct2	T-complex protein 1 subunit beta OS=Mus musculus GN=Cct2 PE=1 SV=4	0	7	0	2	0	3	1	0	0	0	1	0	0	0	0	0
sp|P80318|TCPG_MOUSE	Cct3	T-complex protein 1 subunit gamma OS=Mus musculus GN=Cct3 PE=1 SV=1	0	4	0	3	0	2	0	2	0	1	0	0	2	0	0	0
sp|P80315|TCPD_MOUSE	Cct4	T-complex protein 1 subunit delta OS=Mus musculus GN=Cct4 PE=1 SV=3	0	2	2	3	0	9	2	5	0	0	0	0	0	1	0	2
sp|P80316|TCPE_MOUSE	Cct5	T-complex protein 1 subunit epsilon OS=Mus musculus GN=Cct5 PE=1 SV=1	0	0	0	1	0	1	0	1	0	0	0	0	0	0	0	0
sp|P80317|TCPZ_MOUSE	Cct6a	T-complex protein 1 subunit zeta OS=Mus musculus GN=Cct6a PE=1 SV=3	0	2	2	3	0	5	1	4	0	0	2	0	0	0	3	3
sp|Q61390|TCPW_MOUSE	Cct6b	T-complex protein 1 subunit zeta-2 OS=Mus musculus GN=Cct6b PE=1 SV=4	0	0	0	1	0	0	1	2	0	0	1	2	0	0	0	1
sp|P80313|TCPH_MOUSE	Cct7	T-complex protein 1 subunit eta OS=Mus musculus GN=Cct7 PE=1 SV=1	0	3	8	6	0	3	4	8	1	0	4	4	1	0	5	7
sp|P42932|TCPQ_MOUSE	Cct8	T-complex protein 1 subunit theta OS=Mus musculus GN=Cct8 PE=1 SV=3	0	8	3	4	0	4	2	4	0	0	5	4	3	0	5	4
sp|O54901|OX2G_MOUSE	Cd200	OX-2 membrane glycoprotein OS=Mus musculus GN=Cd200 PE=1 SV=1	0	2	0	0	0	6	0	0	0	0	0	0	0	0	0	1
sp|Q61735|CD47_MOUSE	Cd47	Leukocyte surface antigen CD47 OS=Mus musculus GN=Cd47 PE=1 SV=2	2	8	2	4	1	3	2	4	3	2	2	2	2	4	5	4
sp|P35762|CD81_MOUSE	Cd81	CD81 antigen OS=Mus musculus GN=Cd81 PE=1 SV=2	0	0	0	1	0	5	0	0	0	0	0	0	2	5	0	0
sp|P40237|CD82_MOUSE	Cd82	CD82 antigen OS=Mus musculus GN=Cd82 PE=1 SV=1	0	0	0	0	0	2	0	0	0	0	0	0	0	0	0	0
sp|Q61081|CDC37_MOUSE	Cdc37	Hsp90 co-chaperone Cdc37 OS=Mus musculus GN=Cdc37 PE=1 SV=1	0	0	1	0	0	2	0	0	0	0	0	0	0	0	0	0
sp|P60766|CDC42_MOUSE	Cdc42	Cell division control protein 42 homolog OS=Mus musculus GN=Cdc42 PE=1 SV=2	3	5	1	0	5	0	0	1	4	4	2	0	3	2	3	0
sp|Q7TT50|MRCKB_MOUSE	Cdc42bpb	Serine/threonine-protein kinase MRCK beta OS=Mus musculus GN=Cdc42bpb PE=1 SV=2	0	0	0	0	0	1	0	0	1	0	0	0	0	0	0	0
sp|Q8BGH7|C42S2_MOUSE	Cdc42se2	CDC42 small effector protein 2 OS=Mus musculus GN=Cdc42se2 PE=1 SV=1	0	0	0	0	0	1	0	0	0	0	0	0	0	0	0	0
sp|Q9WTR5|CAD13_MOUSE	Cdh13	Cadherin-13 OS=Mus musculus GN=Cdh13 PE=1 SV=2	0	1	0	0	0	3	1	0	0	0	0	0	0	0	0	0
sp|Q8VDP6|CDIPT_MOUSE	Cdipt	CDP-diacylglycerol--inositol 3-phosphatidyltransferase OS=Mus musculus GN=Cdipt PE=1 SV=1	0	0	2	1	0	3	1	2	3	2	2	1	5	2	0	1
sp|O35495|CDK14_MOUSE	Cdk14	Cyclin-dependent kinase 14 OS=Mus musculus GN=Cdk14 PE=1 SV=2	0	0	0	0	0	2	0	0	0	0	0	0	0	0	0	0
sp|P49615|CDK5_MOUSE	Cdk5	Cyclin-dependent-like kinase 5 OS=Mus musculus GN=Cdk5 PE=1 SV=1	0	1	4	3	0	3	1	5	1	0	4	4	5	0	0	2
tr|A0A0G2JGW6|A0A0G2JGW6_MOUSE	Cdkl5	Cyclin-dependent kinase-like 5 OS=Mus musculus GN=Cdkl5 PE=1 SV=1	0	1	0	0	0	0	0	0	0	0	0	0	0	0	0	0
sp|P98191|CDS1_MOUSE	Cds1	Phosphatidate cytidylyltransferase 1 OS=Mus musculus GN=Cds1 PE=1 SV=2	0	0	0	1	0	0	0	0	0	0	0	0	0	0	0	0
sp|Q99L43|CDS2_MOUSE	Cds2	Phosphatidate cytidylyltransferase 2 OS=Mus musculus GN=Cds2 PE=1 SV=1	1	3	8	6	4	4	5	4	3	8	6	6	8	6	8	4
sp|Q4VAA2|CDV3_MOUSE	Cdv3	Protein CDV3 OS=Mus musculus GN=Cdv3 PE=1 SV=2	0	0	0	0	0	1	0	0	0	0	0	0	0	0	0	0
tr|Q78Y72|Q78Y72_MOUSE	Ceacam14	CEA-related cell adhesion molecule 14 OS=Mus musculus GN=Ceacam14 PE=1 SV=1	0	1	0	0	0	0	0	0	0	0	0	0	0	0	0	0
sp|Q9JKC6|CEND_MOUSE	Cend1	Cell cycle exit and neuronal differentiation protein 1 OS=Mus musculus GN=Cend1 PE=1 SV=1	3	4	0	5	3	9	4	3	5	3	0	3	0	2	2	4
sp|Q9CXS4|CENPV_MOUSE	Cenpv	Centromere protein V OS=Mus musculus GN=Cenpv PE=1 SV=2	1	1	1	1	1	2	0	2	1	6	0	1	3	2	0	0
sp|Q6A065|CE170_MOUSE	Cep170	Centrosomal protein of 170 kDa OS=Mus musculus GN=Cep170 PE=1 SV=2	0	1	0	0	0	0	0	0	0	0	0	0	0	0	0	0
tr|D3Z5G7|D3Z5G7_MOUSE	Ces1b	Carboxylic ester hydrolase OS=Mus musculus GN=Ces1b PE=1 SV=1	0	0	0	0	0	0	0	0	0	0	0	0	2	0	0	0
sp|P18760|COF1_MOUSE	Cfl1	Cofilin-1 OS=Mus musculus GN=Cfl1 PE=1 SV=3	15	24	8	7	6	12	6	4	17	16	4	9	6	7	5	3
sp|P45591|COF2_MOUSE	Cfl2	Cofilin-2 OS=Mus musculus GN=Cfl2 PE=1 SV=1	10	8	2	4	2	7	2	3	1	1	2	2	15	2	2	3
sp|Q9CRB9|MIC19_MOUSE	Chchd3	MICOS complex subunit Mic19 OS=Mus musculus GN=Chchd3 PE=1 SV=1	0	2	0	0	0	0	0	0	0	0	0	0	0	0	0	0
sp|Q8VEA4|MIA40_MOUSE	Chchd4	Mitochondrial intermembrane space import and assembly protein 40 OS=Mus musculus GN=Chchd4 PE=1 SV=1	0	0	0	0	0	1	0	0	0	0	0	0	0	0	0	0
sp|Q91VN4|MIC25_MOUSE	Chchd6	MICOS complex subunit Mic25 OS=Mus musculus GN=Chchd6 PE=1 SV=2	0	3	0	0	0	1	0	0	0	0	0	0	0	2	0	0
sp|Q9Z265|CHK2_MOUSE	Chek2	Serine/threonine-protein kinase Chk2 OS=Mus musculus GN=Chek2 PE=1 SV=1	0	0	0	0	0	0	0	1	0	0	0	0	0	0	0	0
sp|P70232|NCHL1_MOUSE	Chl1	Neural cell adhesion molecule L1-like protein OS=Mus musculus GN=Chl1 PE=1 SV=2	0	3	0	0	0	0	0	0	0	0	0	0	0	0	0	0
sp|Q9DB34|CHM2A_MOUSE	Chmp2a	Charged multivesicular body protein 2a OS=Mus musculus GN=Chmp2a PE=1 SV=1	0	0	0	0	0	2	0	0	0	0	0	0	0	0	0	0
sp|Q9D1P4|CHRD1_MOUSE	Chordc1	Cysteine and histidine-rich domain-containing protein 1 OS=Mus musculus GN=Chordc1 PE=1 SV=1	0	0	0	1	0	0	0	0	2	0	0	0	0	0	0	0
sp|P32211|ACM4_MOUSE	Chrm4	Muscarinic acetylcholine receptor M4 OS=Mus musculus GN=Chrm4 PE=2 SV=1	0	0	0	1	0	0	0	0	0	0	1	0	0	0	0	0
sp|Q91WS0|CISD1_MOUSE	Cisd1	CDGSH iron-sulfur domain-containing protein 1 OS=Mus musculus GN=Cisd1 PE=1 SV=1	0	4	3	3	2	9	4	4	0	3	4	3	0	0	1	5
sp|A2AGT5|CKAP5_MOUSE	Ckap5	Cytoskeleton-associated protein 5 OS=Mus musculus GN=Ckap5 PE=1 SV=1	0	0	0	0	0	1	0	0	0	0	0	0	0	0	1	2
sp|Q04447|KCRB_MOUSE	Ckb	Creatine kinase B-type OS=Mus musculus GN=Ckb PE=1 SV=1	28	69	21	23	26	68	32	28	21	26	24	24	35	31	27	26
sp|P07310|KCRM_MOUSE	Ckm	Creatine kinase M-type OS=Mus musculus GN=Ckm PE=1 SV=1	0	0	0	0	0	0	0	0	0	0	0	0	0	2	0	0
sp|P30275|KCRU_MOUSE	Ckmt1	Creatine kinase U-type, mitochondrial OS=Mus musculus GN=Ckmt1 PE=1 SV=1	3	18	5	8	3	26	9	4	2	2	4	7	3	3	8	11
sp|Q8BRT1|CLAP2_MOUSE	Clasp2	CLIP-associating protein 2 OS=Mus musculus GN=Clasp2 PE=1 SV=1	0	0	0	0	0	0	0	1	0	0	0	1	0	0	0	2
sp|Q60771|CLD11_MOUSE	Cldn11	Claudin-11 OS=Mus musculus GN=Cldn11 PE=1 SV=1	4	4	4	7	3	5	5	4	3	4	4	3	3	4	0	5
sp|Q9QYB1|CLIC4_MOUSE	Clic4	Chloride intracellular channel protein 4 OS=Mus musculus GN=Clic4 PE=1 SV=3	0	0	0	0	0	4	0	0	0	0	2	0	0	0	1	0
tr|Q5SUH6|Q5SUH6_MOUSE	Clint1	Clathrin interactor 1 OS=Mus musculus GN=Clint1 PE=1 SV=1	0	0	0	0	0	1	0	0	0	0	0	0	0	0	0	0
sp|O88696|CLPP_MOUSE	Clpp	ATP-dependent Clp protease proteolytic subunit, mitochondrial OS=Mus musculus GN=Clpp PE=1 SV=1	0	0	1	2	0	4	1	1	0	0	1	0	0	0	2	2
sp|Q8VBZ3|CLPT1_MOUSE	Clptm1	Cleft lip and palate transmembrane protein 1 homolog OS=Mus musculus GN=Clptm1 PE=1 SV=1	1	0	3	2	0	0	3	0	0	0	3	3	2	0	5	3
sp|Q6IRU5|CLCB_MOUSE	Cltb	Clathrin light chain B OS=Mus musculus GN=Cltb PE=1 SV=1	0	0	0	0	0	2	0	0	0	0	0	0	0	0	0	0
sp|Q68FD5|CLH1_MOUSE	Cltc	Clathrin heavy chain 1 OS=Mus musculus GN=Cltc PE=1 SV=3	69	64	85	78	43	46	41	84	49	47	64	77	59	86	63	69
sp|Q06890|CLUS_MOUSE	Clu	Clusterin OS=Mus musculus GN=Clu PE=1 SV=1	0	1	0	0	0	0	0	0	0	0	0	0	0	0	0	0
sp|Q9D4C9|CLVS1_MOUSE	Clvs1	Clavesin-1 OS=Mus musculus GN=Clvs1 PE=1 SV=1	0	1	0	1	0	2	0	0	0	0	0	0	0	0	0	0
sp|Q8R4N0|CLYBL_MOUSE	Clybl	Citrate lyase subunit beta-like protein, mitochondrial OS=Mus musculus GN=Clybl PE=1 SV=2	0	0	0	0	0	2	0	0	0	0	0	0	1	0	0	0
sp|Q99KK2|NEUA_MOUSE	Cmas	N-acylneuraminate cytidylyltransferase OS=Mus musculus GN=Cmas PE=1 SV=2	0	5	0	0	0	1	0	0	0	2	0	0	0	0	1	0
sp|Q9DBP5|KCY_MOUSE	Cmpk1	UMP-CMP kinase OS=Mus musculus GN=Cmpk1 PE=1 SV=1	2	5	2	3	1	7	1	0	3	0	1	0	0	1	0	3
sp|Q3U5Q7|CMPK2_MOUSE	Cmpk2	UMP-CMP kinase 2, mitochondrial OS=Mus musculus GN=Cmpk2 PE=1 SV=2	0	0	0	0	0	0	0	0	1	0	0	0	0	0	0	0
sp|Q8CJ61|CKLF4_MOUSE	Cmtm4	CKLF-like MARVEL transmembrane domain-containing protein 4 OS=Mus musculus GN=Cmtm4 PE=1 SV=1	0	0	0	1	0	0	0	0	0	0	0	0	0	0	0	0
sp|Q9D6G9|CKLF5_MOUSE	Cmtm5	CKLF-like MARVEL transmembrane domain-containing protein 5 OS=Mus musculus GN=Cmtm5 PE=1 SV=1	0	0	2	1	0	0	0	2	1	1	0	0	0	0	1	1
sp|Q9D1A2|CNDP2_MOUSE	Cndp2	Cytosolic non-specific dipeptidase OS=Mus musculus GN=Cndp2 PE=1 SV=1	0	2	0	0	0	3	0	0	0	0	0	0	0	0	0	0
sp|P16330|CN37_MOUSE	Cnp	2',3'-cyclic-nucleotide 3'-phosphodiesterase OS=Mus musculus GN=Cnp PE=1 SV=3	68	44	33	33	34	34	32	38	17	26	30	31	27	39	36	36
sp|P47746|CNR1_MOUSE	Cnr1	Cannabinoid receptor 1 OS=Mus musculus GN=Cnr1 PE=1 SV=1	0	0	0	1	0	0	0	0	0	0	0	0	0	0	0	0
sp|Q5M8N0|CNRP1_MOUSE	Cnrip1	CB1 cannabinoid receptor-interacting protein 1 OS=Mus musculus GN=Cnrip1 PE=1 SV=1	3	16	3	2	0	2	2	2	2	2	3	2	1	3	4	2
sp|P12960|CNTN1_MOUSE	Cntn1	Contactin-1 OS=Mus musculus GN=Cntn1 PE=1 SV=1	19	22	28	30	7	17	22	34	15	10	18	23	13	19	24	26
sp|Q61330|CNTN2_MOUSE	Cntn2	Contactin-2 OS=Mus musculus GN=Cntn2 PE=1 SV=2	0	0	0	0	0	1	0	0	0	0	0	0	0	0	0	0
sp|O54991|CNTP1_MOUSE	Cntnap1	Contactin-associated protein 1 OS=Mus musculus GN=Cntnap1 PE=1 SV=2	1	2	6	4	1	1	4	5	5	3	3	4	2	2	3	2
sp|Q9CPW0|CNTP2_MOUSE	Cntnap2	Contactin-associated protein-like 2 OS=Mus musculus GN=Cntnap2 PE=1 SV=2	0	0	2	3	0	0	0	5	0	0	0	0	0	0	0	3
sp|Q99P47|CNTP4_MOUSE	Cntnap4	Contactin-associated protein-like 4 OS=Mus musculus GN=Cntnap4 PE=1 SV=2	0	0	0	0	0	0	0	0	0	1	0	0	0	0	0	0
sp|Q9D2R6|COA3_MOUSE	Coa3	Cytochrome c oxidase assembly factor 3 homolog, mitochondrial OS=Mus musculus GN=Coa3 PE=1 SV=1	0	0	0	0	0	1	0	0	0	0	0	0	0	0	0	0
sp|Q8BGD8|COA6_MOUSE	Coa6	Cytochrome c oxidase assembly factor 6 homolog OS=Mus musculus GN=Coa6 PE=1 SV=1	0	0	0	0	0	2	0	0	0	0	0	0	0	0	0	0
sp|Q0VF58|COJA1_MOUSE	Col19a1	Collagen alpha-1(XIX) chain OS=Mus musculus GN=Col19a1 PE=2 SV=2	0	0	0	0	1	3	0	0	0	0	0	1	0	0	0	0
sp|P11087|CO1A1_MOUSE	Col1a1	Collagen alpha-1(I) chain OS=Mus musculus GN=Col1a1 PE=1 SV=4	0	0	0	0	0	0	0	0	0	1	0	0	0	0	0	0
sp|Q8CIE6|COPA_MOUSE	Copa	Coatomer subunit alpha OS=Mus musculus GN=Copa PE=1 SV=2	0	0	0	1	0	3	0	0	0	0	0	2	0	0	0	2
sp|Q9JIF7|COPB_MOUSE	Copb1	Coatomer subunit beta OS=Mus musculus GN=Copb1 PE=1 SV=1	0	0	1	0	0	0	0	0	0	0	0	0	0	0	0	0
sp|O55029|COPB2_MOUSE	Copb2	Coatomer subunit beta' OS=Mus musculus GN=Copb2 PE=1 SV=2	0	0	2	1	0	2	0	1	0	0	1	1	0	2	3	1
sp|Q9QXK3|COPG2_MOUSE	Copg2	Coatomer subunit gamma-2 OS=Mus musculus GN=Copg2 PE=1 SV=1	0	0	0	0	0	0	0	0	0	0	0	0	3	0	0	0
sp|O88543|CSN3_MOUSE	Cops3	COP9 signalosome complex subunit 3 OS=Mus musculus GN=Cops3 PE=1 SV=3	1	0	0	1	1	4	0	3	0	0	1	0	0	0	0	2
sp|O88544|CSN4_MOUSE	Cops4	COP9 signalosome complex subunit 4 OS=Mus musculus GN=Cops4 PE=1 SV=1	0	0	0	0	0	7	0	0	0	0	0	0	0	0	0	0
sp|O35864|CSN5_MOUSE	Cops5	COP9 signalosome complex subunit 5 OS=Mus musculus GN=Cops5 PE=1 SV=3	0	0	1	1	0	3	1	2	0	0	0	0	0	0	2	0
sp|Q9CZ04|CSN7A_MOUSE	Cops7a	COP9 signalosome complex subunit 7a OS=Mus musculus GN=Cops7a PE=1 SV=2	0	0	0	0	0	4	0	0	0	0	0	0	0	0	0	0
sp|P61924|COPZ1_MOUSE	Copz1	Coatomer subunit zeta-1 OS=Mus musculus GN=Copz1 PE=1 SV=1	0	0	1	0	0	0	1	0	0	0	0	0	0	0	0	0
sp|O89053|COR1A_MOUSE	Coro1a	Coronin-1A OS=Mus musculus GN=Coro1a PE=1 SV=5	2	3	6	5	1	8	4	9	3	0	4	5	2	2	7	8
sp|Q9WUM3|COR1B_MOUSE	Coro1b	Coronin-1B OS=Mus musculus GN=Coro1b PE=1 SV=1	0	0	3	2	0	3	0	5	0	0	2	3	0	0	3	3
sp|Q9WUM4|COR1C_MOUSE	Coro1c	Coronin-1C OS=Mus musculus GN=Coro1c PE=1 SV=2	2	2	2	6	1	1	0	2	3	1	1	3	2	2	4	3
sp|Q8BH44|COR2B_MOUSE	Coro2b	Coronin-2B OS=Mus musculus GN=Coro2b PE=1 SV=2	0	0	2	0	0	0	0	1	1	0	0	0	0	0	1	1
sp|Q9D2V7|CORO7_MOUSE	Coro7	Coronin-7 OS=Mus musculus GN=Coro7 PE=1 SV=2	0	0	0	0	0	0	0	1	0	0	0	0	0	0	0	0
sp|Q9CQI6|COTL1_MOUSE	Cotl1	Coactosin-like protein OS=Mus musculus GN=Cotl1 PE=1 SV=3	0	5	0	0	0	2	0	0	1	0	0	1	0	0	0	3
sp|P19783|COX41_MOUSE	Cox4i1	Cytochrome c oxidase subunit 4 isoform 1, mitochondrial OS=Mus musculus GN=Cox4i1 PE=1 SV=2	0	0	0	0	0	6	2	0	0	0	0	1	0	0	0	0
sp|P12787|COX5A_MOUSE	Cox5a	Cytochrome c oxidase subunit 5A, mitochondrial OS=Mus musculus GN=Cox5a PE=1 SV=2	0	0	0	0	0	1	0	0	0	0	0	3	0	0	0	0
sp|P19536|COX5B_MOUSE	Cox5b	Cytochrome c oxidase subunit 5B, mitochondrial OS=Mus musculus GN=Cox5b PE=1 SV=1	0	1	0	0	0	8	1	2	2	0	1	0	0	1	0	0
sp|Q9CPQ1|COX6C_MOUSE	Cox6c	Cytochrome c oxidase subunit 6C OS=Mus musculus GN=Cox6c PE=1 SV=3	0	0	0	0	0	1	0	0	0	0	0	0	0	0	0	0
sp|P48771|CX7A2_MOUSE	Cox7a2	Cytochrome c oxidase subunit 7A2, mitochondrial OS=Mus musculus GN=Cox7a2 PE=1 SV=2	1	0	0	0	0	0	1	0	0	0	0	1	0	0	0	0
sp|Q61387|COX7R_MOUSE	Cox7a2l	Cytochrome c oxidase subunit 7A-related protein, mitochondrial OS=Mus musculus GN=Cox7a2l PE=1 SV=1	0	0	0	1	0	3	0	0	0	0	0	0	0	0	0	0
sp|Q61147|CERU_MOUSE	Cp	Ceruloplasmin OS=Mus musculus GN=Cp PE=1 SV=2	0	0	1	0	0	0	0	0	0	0	0	0	0	0	0	0
sp|Q00493|CBPE_MOUSE	Cpe	Carboxypeptidase E OS=Mus musculus GN=Cpe PE=1 SV=2	0	0	0	0	0	1	0	0	0	0	0	0	0	0	0	0
sp|P63040|CPLX1_MOUSE	Cplx1	Complexin-1 OS=Mus musculus GN=Cplx1 PE=1 SV=1	0	0	0	0	1	2	0	0	0	0	0	0	0	0	0	0
sp|P84086|CPLX2_MOUSE	Cplx2	Complexin-2 OS=Mus musculus GN=Cplx2 PE=1 SV=1	1	0	0	0	0	2	0	0	0	0	0	0	0	0	0	0
sp|Q8BLR2|CPNE4_MOUSE	Cpne4	Copine-4 OS=Mus musculus GN=Cpne4 PE=1 SV=1	0	0	0	1	0	0	0	1	0	0	0	0	0	0	1	3
sp|Q9Z140|CPNE6_MOUSE	Cpne6	Copine-6 OS=Mus musculus GN=Cpne6 PE=1 SV=1	0	3	3	2	0	2	2	4	1	1	1	0	0	0	1	3
sp|Q0VE82|CPNE7_MOUSE	Cpne7	Copine-7 OS=Mus musculus GN=Cpne7 PE=1 SV=1	0	0	1	1	0	1	0	2	0	0	0	0	0	0	0	1
sp|Q9DC53|CPNE8_MOUSE	Cpne8	Copine-8 OS=Mus musculus GN=Cpne8 PE=2 SV=3	0	0	0	0	0	0	0	1	0	0	0	0	0	0	0	1
sp|Q9QXK7|CPSF3_MOUSE	Cpsf3	Cleavage and polyadenylation specificity factor subunit 3 OS=Mus musculus GN=Cpsf3 PE=1 SV=2	0	0	0	0	0	0	0	0	1	0	0	0	0	0	0	0
sp|Q6NVF9|CPSF6_MOUSE	Cpsf6	Cleavage and polyadenylation specificity factor subunit 6 OS=Mus musculus GN=Cpsf6 PE=1 SV=1	0	0	0	0	0	1	0	0	0	0	0	0	0	0	0	0
sp|P62965|RABP1_MOUSE	Crabp1	Cellular retinoic acid-binding protein 1 OS=Mus musculus GN=Crabp1 PE=1 SV=2	0	0	0	0	0	1	0	0	0	0	0	0	0	0	0	0
sp|Q8C7D2|CRBN_MOUSE	Crbn	Protein cereblon OS=Mus musculus GN=Crbn PE=1 SV=1	0	0	0	0	0	0	0	0	1	0	0	0	0	0	0	0
sp|Q9D2A5|CR3L4_MOUSE	Creb3l4	Cyclic AMP-responsive element-binding protein 3-like protein 4 OS=Mus musculus GN=Creb3l4 PE=1 SV=1	1	0	0	0	0	0	0	0	0	0	0	0	0	0	0	0
sp|Q8K1L0|CREB5_MOUSE	Creb5	Cyclic AMP-responsive element-binding protein 5 OS=Mus musculus GN=Creb5 PE=2 SV=3	0	0	0	0	0	0	0	0	0	0	0	0	0	0	0	1
sp|Q9DCT8|CRIP2_MOUSE	Crip2	Cysteine-rich protein 2 OS=Mus musculus GN=Crip2 PE=1 SV=1	0	4	1	4	0	2	1	3	1	1	0	2	1	0	1	0
sp|Q64010|CRK_MOUSE	Crk	Adapter molecule crk OS=Mus musculus GN=Crk PE=1 SV=1	0	1	0	0	0	3	0	0	0	0	0	0	0	0	0	0
sp|P97427|DPYL1_MOUSE	Crmp1	Dihydropyrimidinase-related protein 1 OS=Mus musculus GN=Crmp1 PE=1 SV=1	6	40	27	23	12	62	13	25	5	9	16	12	7	15	16	25
sp|Q68ED7|CRTC1_MOUSE	Crtc1	CREB-regulated transcription coactivator 1 OS=Mus musculus GN=Crtc1 PE=1 SV=1	0	0	0	0	0	1	0	0	0	0	0	0	0	0	0	0
sp|O54983|CRYM_MOUSE	Crym	Ketimine reductase mu-crystallin OS=Mus musculus GN=Crym PE=1 SV=1	8	10	15	14	9	7	5	16	5	4	10	14	1	5	13	16
sp|P47199|QOR_MOUSE	Cryz	Quinone oxidoreductase OS=Mus musculus GN=Cryz PE=1 SV=1	0	0	0	2	0	0	0	1	0	0	0	0	0	0	0	0
sp|Q9CZU6|CISY_MOUSE	Cs	Citrate synthase, mitochondrial OS=Mus musculus GN=Cs PE=1 SV=1	2	10	5	4	0	12	7	8	0	3	3	4	0	1	4	6
sp|Q91W50|CSDE1_MOUSE	Csde1	Cold shock domain-containing protein E1 OS=Mus musculus GN=Csde1 PE=1 SV=1	0	1	0	1	0	0	0	0	0	0	0	0	0	0	0	0
sp|Q9ERK4|XPO2_MOUSE	Cse1l	Exportin-2 OS=Mus musculus GN=Cse1l PE=1 SV=1	0	0	0	1	0	0	0	1	0	0	0	0	0	0	0	0
sp|Q71M36|CSPG5_MOUSE	Cspg5	Chondroitin sulfate proteoglycan 5 OS=Mus musculus GN=Cspg5 PE=1 SV=2	0	0	0	0	0	3	0	0	0	0	0	0	0	0	0	0
sp|P97315|CSRP1_MOUSE	Csrp1	Cysteine and glycine-rich protein 1 OS=Mus musculus GN=Csrp1 PE=1 SV=3	1	6	3	3	0	9	3	0	0	1	3	0	0	4	3	3
sp|P21460|CYTC_MOUSE	Cst3	Cystatin-C OS=Mus musculus GN=Cst3 PE=1 SV=2	0	1	1	0	0	2	1	1	1	1	0	0	0	1	0	1
sp|Q62426|CYTB_MOUSE	Cstb	Cystatin-B OS=Mus musculus GN=Cstb PE=1 SV=1	0	0	0	0	0	1	0	0	0	0	0	0	0	0	0	0
sp|O88712|CTBP1_MOUSE	Ctbp1	C-terminal-binding protein 1 OS=Mus musculus GN=Ctbp1 PE=1 SV=2	0	0	0	2	0	5	2	2	0	0	2	1	0	0	1	2
sp|Q8BG15|CTSL2_MOUSE	Ctdspl2	CTD small phosphatase-like protein 2 OS=Mus musculus GN=Ctdspl2 PE=1 SV=1	0	1	0	0	0	0	0	0	0	0	0	0	0	0	0	0
sp|P26231|CTNA1_MOUSE	Ctnna1	Catenin alpha-1 OS=Mus musculus GN=Ctnna1 PE=1 SV=1	0	1	0	0	0	0	0	0	0	0	0	0	0	0	0	0
sp|Q61301|CTNA2_MOUSE	Ctnna2	Catenin alpha-2 OS=Mus musculus GN=Ctnna2 PE=1 SV=3	0	1	0	0	0	3	0	0	0	0	0	0	0	0	0	0
sp|Q02248|CTNB1_MOUSE	Ctnnb1	Catenin beta-1 OS=Mus musculus GN=Ctnnb1 PE=1 SV=1	0	1	7	5	4	7	3	9	1	0	5	4	0	0	4	9
tr|E9Q8Z4|E9Q8Z4_MOUSE	Ctnnd1	Catenin delta-1 OS=Mus musculus GN=Ctnnd1 PE=1 SV=1	18	16	0	0	9	27	0	0	13	18	0	0	19	19	0	0
sp|P18242|CATD_MOUSE	Ctsd	Cathepsin D OS=Mus musculus GN=Ctsd PE=1 SV=1	1	2	1	3	2	8	2	1	1	0	1	1	0	0	1	2
sp|P06797|CATL1_MOUSE	Ctsl	Cathepsin L1 OS=Mus musculus GN=Ctsl PE=1 SV=2	0	0	0	0	0	4	0	0	0	0	0	0	0	0	0	0
sp|Q60598|SRC8_MOUSE	Cttn	Src substrate cortactin OS=Mus musculus GN=Cttn PE=1 SV=2	0	3	2	5	0	10	3	3	3	4	5	4	2	2	6	0
sp|Q9D4H8|CUL2_MOUSE	Cul2	Cullin-2 OS=Mus musculus GN=Cul2 PE=1 SV=2	0	0	1	3	0	0	0	2	0	0	1	2	0	0	3	2
sp|Q9JLV5|CUL3_MOUSE	Cul3	Cullin-3 OS=Mus musculus GN=Cul3 PE=1 SV=1	0	1	1	0	0	0	0	4	0	0	0	2	0	0	0	0
sp|Q8VE73|CUL7_MOUSE	Cul7	Cullin-7 OS=Mus musculus GN=Cul7 PE=1 SV=2	0	0	0	0	0	0	0	0	0	0	0	2	0	0	0	0
sp|Q9CQX2|CYB5B_MOUSE	Cyb5b	Cytochrome b5 type B OS=Mus musculus GN=Cyb5b PE=1 SV=1	0	0	3	4	0	1	1	2	0	4	2	2	0	0	1	4
sp|Q9DB73|NB5R1_MOUSE	Cyb5r1	NADH-cytochrome b5 reductase 1 OS=Mus musculus GN=Cyb5r1 PE=1 SV=1	0	0	3	0	0	3	1	3	0	0	0	0	0	0	0	0
sp|Q9DCN2|NB5R3_MOUSE	Cyb5r3	NADH-cytochrome b5 reductase 3 OS=Mus musculus GN=Cyb5r3 PE=1 SV=3	1	0	2	2	1	3	2	1	2	1	3	1	1	1	2	2
sp|Q9D0M3|CY1_MOUSE	Cyc1	Cytochrome c1, heme protein, mitochondrial OS=Mus musculus GN=Cyc1 PE=1 SV=1	0	1	5	5	0	7	8	0	1	0	3	6	0	0	5	7
sp|P62897|CYC_MOUSE	Cycs	Cytochrome c, somatic OS=Mus musculus GN=Cycs PE=1 SV=2	12	9	6	4	1	8	8	4	2	5	6	3	4	8	5	4
sp|P00015|CYC2_MOUSE	Cyct	Cytochrome c, testis-specific OS=Mus musculus GN=Cyct PE=1 SV=3	0	0	0	0	0	0	0	1	0	0	5	0	5	0	0	0
sp|Q7TMB8|CYFP1_MOUSE	Cyfip1	Cytoplasmic FMR1-interacting protein 1 OS=Mus musculus GN=Cyfip1 PE=1 SV=1	0	0	0	1	0	1	0	2	0	0	0	1	0	0	0	2
sp|Q5SQX6|CYFP2_MOUSE	Cyfip2	Cytoplasmic FMR1-interacting protein 2 OS=Mus musculus GN=Cyfip2 PE=1 SV=2	3	5	12	13	2	12	7	12	4	3	12	11	3	5	14	13
sp|Q80TQ2|CYLD_MOUSE	Cyld	Ubiquitin carboxyl-terminal hydrolase CYLD OS=Mus musculus GN=Cyld PE=1 SV=2	0	0	0	0	0	0	1	0	0	1	1	0	0	0	0	0
sp|Q9WVK8|CP46A_MOUSE	Cyp46a1	Cholesterol 24-hydroxylase OS=Mus musculus GN=Cyp46a1 PE=1 SV=1	0	1	2	3	0	0	0	2	0	0	2	1	0	0	0	2
sp|Q8K353|CYTM1_MOUSE	Cystm1	Cysteine-rich and transmembrane domain-containing protein 1 OS=Mus musculus GN=Cystm1 PE=1 SV=1	0	0	0	0	0	0	0	0	0	1	0	0	0	0	0	0
sp|Q9D172|ES1_MOUSE	D10Jhu81e	ES1 protein homolog, mitochondrial OS=Mus musculus GN=D10Jhu81e PE=1 SV=1	2	4	7	5	1	5	2	4	1	1	3	5	3	2	7	9
tr|F6ZGR6|F6ZGR6_MOUSE	D430041D05Rik	RIKEN cDNA D430041D05 gene (Fragment) OS=Mus musculus GN=D430041D05Rik PE=1 SV=1	0	0	0	0	0	1	0	0	0	0	0	0	0	0	0	0
tr|Q8C6N2|Q8C6N2_MOUSE	D830025C05Rik	Putative uncharacterized protein (Fragment) OS=Mus musculus GN=D830025C05Rik PE=2 SV=1	0	0	0	0	1	0	0	0	0	0	0	0	0	0	0	0
sp|P61804|DAD1_MOUSE	Dad1	Dolichyl-diphosphooligosaccharide--protein glycosyltransferase subunit DAD1 OS=Mus musculus GN=Dad1 PE=1 SV=3	0	0	2	1	0	0	1	0	0	0	1	0	0	0	0	0
sp|Q922B2|SYDC_MOUSE	Dars	Aspartate--tRNA ligase, cytoplasmic OS=Mus musculus GN=Dars PE=1 SV=2	0	0	2	2	0	2	2	3	0	3	1	0	0	2	1	2
sp|Q9QXS6|DREB_MOUSE	Dbn1	Drebrin OS=Mus musculus GN=Dbn1 PE=1 SV=4	1	2	0	0	0	2	0	0	0	0	0	0	0	0	0	0
sp|Q9JLM8|DCLK1_MOUSE	Dclk1	Serine/threonine-protein kinase DCLK1 OS=Mus musculus GN=Dclk1 PE=1 SV=1	0	6	2	3	0	6	1	2	1	0	2	1	6	1	4	5
sp|Q6PGN3|DCLK2_MOUSE	Dclk2	Serine/threonine-protein kinase DCLK2 OS=Mus musculus GN=Dclk2 PE=1 SV=1	0	0	0	0	0	0	1	0	0	0	0	1	0	0	0	0
tr|E9PYC2|E9PYC2_MOUSE	Dcpp2	Demilune cell and parotid protein 2 OS=Mus musculus GN=Dcpp2 PE=1 SV=1	0	0	0	0	0	0	1	0	0	0	0	0	0	0	0	0
sp|O08788|DCTN1_MOUSE	Dctn1	Dynactin subunit 1 OS=Mus musculus GN=Dctn1 PE=1 SV=3	0	0	2	3	0	3	3	0	0	0	0	0	0	1	2	3
sp|Q99KJ8|DCTN2_MOUSE	Dctn2	Dynactin subunit 2 OS=Mus musculus GN=Dctn2 PE=1 SV=3	0	1	0	0	0	8	0	0	0	0	0	0	0	0	0	0
sp|Q9Z0Y1|DCTN3_MOUSE	Dctn3	Dynactin subunit 3 OS=Mus musculus GN=Dctn3 PE=1 SV=2	0	0	0	0	0	3	0	0	0	0	0	0	0	0	0	0
sp|Q8CBY8|DCTN4_MOUSE	Dctn4	Dynactin subunit 4 OS=Mus musculus GN=Dctn4 PE=1 SV=1	0	0	3	3	0	2	2	5	0	0	1	2	0	0	1	1
sp|Q9QZB9|DCTN5_MOUSE	Dctn5	Dynactin subunit 5 OS=Mus musculus GN=Dctn5 PE=1 SV=1	0	0	0	0	0	0	0	2	0	0	0	0	0	0	0	0
sp|Q9CWS0|DDAH1_MOUSE	Ddah1	N(G),N(G)-dimethylarginine dimethylaminohydrolase 1 OS=Mus musculus GN=Ddah1 PE=1 SV=3	0	4	0	1	0	5	1	0	0	0	1	0	2	4	1	2
sp|Q99LD8|DDAH2_MOUSE	Ddah2	N(G),N(G)-dimethylarginine dimethylaminohydrolase 2 OS=Mus musculus GN=Ddah2 PE=1 SV=1	0	0	0	0	0	1	0	0	0	0	0	0	0	0	0	0
sp|Q3U1J4|DDB1_MOUSE	Ddb1	DNA damage-binding protein 1 OS=Mus musculus GN=Ddb1 PE=1 SV=2	0	0	2	3	0	0	0	2	2	0	1	1	0	0	3	4
sp|O88533|DDC_MOUSE	Ddc	Aromatic-L-amino-acid decarboxylase OS=Mus musculus GN=Ddc PE=1 SV=1	0	0	2	1	0	2	0	0	1	0	1	0	0	0	1	3
sp|O54734|OST48_MOUSE	Ddost	Dolichyl-diphosphooligosaccharide--protein glycosyltransferase 48 kDa subunit OS=Mus musculus GN=Ddost PE=1 SV=2	0	1	0	0	0	0	0	0	0	0	0	0	0	0	0	0
sp|O35215|DOPD_MOUSE	Ddt	D-dopachrome decarboxylase OS=Mus musculus GN=Ddt PE=1 SV=3	1	2	1	1	0	3	0	0	0	0	1	0	1	0	0	2
sp|Q91VR5|DDX1_MOUSE	Ddx1	ATP-dependent RNA helicase DDX1 OS=Mus musculus GN=Ddx1 PE=1 SV=1	0	0	2	2	0	0	0	0	0	0	0	0	0	0	0	0
sp|Q61655|DD19A_MOUSE	Ddx19a	ATP-dependent RNA helicase DDX19A OS=Mus musculus GN=Ddx19a PE=1 SV=2	0	0	0	1	0	1	0	2	0	0	1	2	0	0	1	1
sp|Q9QY15|DDX25_MOUSE	Ddx25	ATP-dependent RNA helicase DDX25 OS=Mus musculus GN=Ddx25 PE=1 SV=2	0	0	0	0	0	0	0	0	0	0	0	1	0	0	0	2
sp|Q8VDW0|DX39A_MOUSE	Ddx39a	ATP-dependent RNA helicase DDX39A OS=Mus musculus GN=Ddx39a PE=1 SV=1	0	0	4	3	0	0	0	2	0	0	0	1	0	0	2	2
sp|Q9Z1N5|DX39B_MOUSE	Ddx39b	Spliceosome RNA helicase Ddx39b OS=Mus musculus GN=Ddx39b PE=1 SV=1	0	1	1	0	1	2	1	0	0	0	0	1	1	2	2	2
sp|Q62167|DDX3X_MOUSE	Ddx3x	ATP-dependent RNA helicase DDX3X OS=Mus musculus GN=Ddx3x PE=1 SV=3	0	0	0	0	0	1	0	0	0	0	0	0	0	0	0	0
sp|Q61656|DDX5_MOUSE	Ddx5	Probable ATP-dependent RNA helicase DDX5 OS=Mus musculus GN=Ddx5 PE=1 SV=2	0	0	0	0	0	0	0	0	0	0	0	0	0	0	0	1
sp|P54823|DDX6_MOUSE	Ddx6	Probable ATP-dependent RNA helicase DDX6 OS=Mus musculus GN=Ddx6 PE=1 SV=1	0	0	3	3	0	0	2	1	0	0	1	2	0	0	5	1
sp|Q9CQ62|DECR_MOUSE	Decr1	2,4-dienoyl-CoA reductase, mitochondrial OS=Mus musculus GN=Decr1 PE=1 SV=1	0	0	0	0	0	3	0	0	0	0	0	0	0	0	0	0
sp|Q9CQJ6|DENR_MOUSE	Denr	Density-regulated protein OS=Mus musculus GN=Denr PE=1 SV=1	0	3	0	0	0	0	0	0	0	0	0	0	0	2	0	0
sp|P31001|DESM_MOUSE	Des	Desmin OS=Mus musculus GN=Des PE=1 SV=3	0	0	0	0	0	1	0	0	0	0	0	0	0	0	0	0
sp|Q6NS52|DGKB_MOUSE	Dgkb	Diacylglycerol kinase beta OS=Mus musculus GN=Dgkb PE=1 SV=2	2	0	0	4	0	0	0	5	0	0	0	1	0	2	2	2
sp|Q9R1C6|DGKE_MOUSE	Dgke	Diacylglycerol kinase epsilon OS=Mus musculus GN=Dgke PE=1 SV=1	0	0	0	1	1	0	0	1	0	0	0	0	3	0	1	0
sp|O88455|DHCR7_MOUSE	Dhcr7	7-dehydrocholesterol reductase OS=Mus musculus GN=Dhcr7 PE=1 SV=1	0	0	0	1	0	0	0	0	0	0	0	0	0	0	0	0
sp|Q99L04|DHRS1_MOUSE	Dhrs1	Dehydrogenase/reductase SDR family member 1 OS=Mus musculus GN=Dhrs1 PE=1 SV=1	0	0	0	0	0	0	1	0	0	0	1	0	0	0	2	0
sp|O35286|DHX15_MOUSE	Dhx15	Pre-mRNA-splicing factor ATP-dependent RNA helicase DHX15 OS=Mus musculus GN=Dhx15 PE=1 SV=2	0	1	1	1	0	0	1	1	0	0	1	1	0	0	1	1
sp|O70133|DHX9_MOUSE	Dhx9	ATP-dependent RNA helicase A OS=Mus musculus GN=Dhx9 PE=1 SV=2	0	0	1	2	0	1	0	0	0	0	0	1	0	0	1	0
sp|Q3UH60|DIP2B_MOUSE	Dip2b	Disco-interacting protein 2 homolog B OS=Mus musculus GN=Dip2b PE=1 SV=1	0	0	0	1	0	0	0	1	0	0	0	0	0	0	0	0
tr|B2RQ71|B2RQ71_MOUSE	Dip2c	Dip2c protein OS=Mus musculus GN=Dip2c PE=1 SV=1	0	0	0	0	0	1	0	0	0	1	0	0	0	0	0	0
sp|Q91Z61|DIRA1_MOUSE	Diras1	GTP-binding protein Di-Ras1 OS=Mus musculus GN=Diras1 PE=1 SV=1	0	2	0	0	0	1	0	1	0	0	0	0	1	0	2	2
sp|Q5PR73|DIRA2_MOUSE	Diras2	GTP-binding protein Di-Ras2 OS=Mus musculus GN=Diras2 PE=1 SV=1	2	4	3	3	0	2	2	3	1	2	2	3	1	3	3	5
sp|Q8BMF4|ODP2_MOUSE	Dlat	Dihydrolipoyllysine-residue acetyltransferase component of pyruvate dehydrogenase complex, mitochondrial OS=Mus musculus GN=Dlat PE=1 SV=2	0	3	1	4	0	7	2	5	2	0	1	2	1	0	2	5
sp|O08749|DLDH_MOUSE	Dld	Dihydrolipoyl dehydrogenase, mitochondrial OS=Mus musculus GN=Dld PE=1 SV=2	4	12	7	8	5	9	5	12	6	3	7	6	1	2	8	8
sp|Q811D0|DLG1_MOUSE	Dlg1	Disks large homolog 1 OS=Mus musculus GN=Dlg1 PE=1 SV=1	0	5	0	1	0	0	0	0	0	0	0	0	0	0	0	0
sp|Q91XM9|DLG2_MOUSE	Dlg2	Disks large homolog 2 OS=Mus musculus GN=Dlg2 PE=1 SV=2	0	1	0	0	0	3	0	0	0	0	0	1	0	0	0	0
sp|P70175|DLG3_MOUSE	Dlg3	Disks large homolog 3 OS=Mus musculus GN=Dlg3 PE=1 SV=1	0	0	0	0	0	2	0	0	0	0	0	0	0	0	0	0
sp|Q62108|DLG4_MOUSE	Dlg4	Disks large homolog 4 OS=Mus musculus GN=Dlg4 PE=1 SV=1	0	0	0	0	0	3	0	0	0	0	0	0	0	0	0	0
sp|Q6PFD5|DLGP3_MOUSE	Dlgap3	Disks large-associated protein 3 OS=Mus musculus GN=Dlgap3 PE=1 SV=1	0	0	0	0	0	0	0	0	0	0	0	1	0	0	0	1
sp|Q9D2G2|ODO2_MOUSE	Dlst	Dihydrolipoyllysine-residue succinyltransferase component of 2-oxoglutarate dehydrogenase complex, mitochondrial OS=Mus musculus GN=Dlst PE=1 SV=1	0	10	3	2	0	15	3	5	0	1	3	2	3	1	2	5
sp|P54265|DMPK_MOUSE	Dmpk	Myotonin-protein kinase OS=Mus musculus GN=Dmpk PE=1 SV=1	1	0	0	0	0	0	0	0	0	0	0	0	0	0	0	0
sp|Q9WV69|DEMA_MOUSE	Dmtn	Dematin OS=Mus musculus GN=Dmtn PE=1 SV=1	0	3	3	4	0	5	3	3	4	1	4	2	2	0	6	3
sp|Q8BPN8|DMXL2_MOUSE	Dmxl2	DmX-like protein 2 OS=Mus musculus GN=Dmxl2 PE=1 SV=3	7	2	19	18	5	13	8	10	13	6	18	16	7	5	19	14
sp|Q91XQ0|DYH8_MOUSE	Dnah8	Dynein heavy chain 8, axonemal OS=Mus musculus GN=Dnah8 PE=1 SV=2	1	0	0	0	0	0	0	0	0	0	0	0	0	0	0	0
sp|P63037|DNJA1_MOUSE	Dnaja1	DnaJ homolog subfamily A member 1 OS=Mus musculus GN=Dnaja1 PE=1 SV=1	0	2	0	0	0	1	1	0	0	0	0	0	0	0	0	0
sp|Q9QYJ0|DNJA2_MOUSE	Dnaja2	DnaJ homolog subfamily A member 2 OS=Mus musculus GN=Dnaja2 PE=1 SV=1	0	3	0	1	0	2	0	1	0	0	0	0	2	0	0	1
sp|Q99M87|DNJA3_MOUSE	Dnaja3	DnaJ homolog subfamily A member 3, mitochondrial OS=Mus musculus GN=Dnaja3 PE=1 SV=1	0	0	0	0	0	1	0	0	0	0	0	0	0	0	0	0
sp|Q9QYJ3|DNJB1_MOUSE	Dnajb1	DnaJ homolog subfamily B member 1 OS=Mus musculus GN=Dnajb1 PE=1 SV=3	0	0	0	0	0	1	0	0	0	0	0	0	0	0	0	0
sp|Q9QYI5|DNJB2_MOUSE	Dnajb2	DnaJ homolog subfamily B member 2 OS=Mus musculus GN=Dnajb2 PE=1 SV=3	0	0	0	0	0	2	0	0	0	0	0	0	0	0	0	0
sp|P60904|DNJC5_MOUSE	Dnajc5	DnaJ homolog subfamily C member 5 OS=Mus musculus GN=Dnajc5 PE=1 SV=1	0	3	0	3	0	8	0	0	3	0	0	0	0	0	0	0
sp|Q80TZ3|AUXI_MOUSE	Dnajc6	Putative tyrosine-protein phosphatase auxilin OS=Mus musculus GN=Dnajc6 PE=1 SV=2	1	3	9	6	2	8	3	9	3	2	6	4	4	0	6	10
sp|P39053|DYN1_MOUSE	Dnm1	Dynamin-1 OS=Mus musculus GN=Dnm1 PE=1 SV=2	9	27	29	25	11	58	29	38	19	9	23	25	35	14	21	36
sp|Q8K1M6|DNM1L_MOUSE	Dnm1l	Dynamin-1-like protein OS=Mus musculus GN=Dnm1l PE=1 SV=2	0	4	1	1	0	5	0	3	1	0	0	0	0	0	0	3
sp|Q8BZ98|DYN3_MOUSE	Dnm3	Dynamin-3 OS=Mus musculus GN=Dnm3 PE=1 SV=1	2	16	10	14	2	12	10	21	10	0	11	9	5	13	18	14
sp|Q6NXK7|DPP10_MOUSE	Dpp10	Inactive dipeptidyl peptidase 10 OS=Mus musculus GN=Dpp10 PE=1 SV=1	0	5	3	6	0	7	1	6	2	0	2	2	1	0	3	4
sp|Q9Z218|DPP6_MOUSE	Dpp6	Dipeptidyl aminopeptidase-like protein 6 OS=Mus musculus GN=Dpp6 PE=1 SV=1	0	6	6	6	0	6	3	7	3	4	3	3	1	9	6	6
sp|O08553|DPYL2_MOUSE	Dpysl2	Dihydropyrimidinase-related protein 2 OS=Mus musculus GN=Dpysl2 PE=1 SV=2	13	68	24	27	19	51	30	24	15	22	27	31	30	26	16	27
sp|Q62188|DPYL3_MOUSE	Dpysl3	Dihydropyrimidinase-related protein 3 OS=Mus musculus GN=Dpysl3 PE=1 SV=1	0	17	4	7	3	28	9	6	2	2	7	3	1	1	8	10
sp|O35098|DPYL4_MOUSE	Dpysl4	Dihydropyrimidinase-related protein 4 OS=Mus musculus GN=Dpysl4 PE=1 SV=1	0	3	4	5	0	10	3	4	1	1	1	2	0	0	6	6
sp|Q9EQF6|DPYL5_MOUSE	Dpysl5	Dihydropyrimidinase-related protein 5 OS=Mus musculus GN=Dpysl5 PE=1 SV=1	3	3	13	6	0	6	5	9	1	0	3	4	6	6	4	7
sp|Q9QXB9|DRG2_MOUSE	Drg2	Developmentally-regulated GTP-binding protein 2 OS=Mus musculus GN=Drg2 PE=1 SV=1	0	0	1	1	0	1	0	1	0	0	0	1	1	0	0	0
sp|O35075|DSCR3_MOUSE	Dscr3	Down syndrome critical region protein 3 homolog OS=Mus musculus GN=Dscr3 PE=1 SV=1	0	0	0	0	0	0	0	1	0	0	0	0	0	0	0	0
sp|Q91ZU6|DYST_MOUSE	Dst	Dystonin OS=Mus musculus GN=Dst PE=1 SV=2	0	0	0	0	0	4	0	0	0	0	0	0	0	0	0	0
sp|Q9R0P5|DEST_MOUSE	Dstn	Destrin OS=Mus musculus GN=Dstn PE=1 SV=3	1	4	2	2	5	4	3	3	2	3	3	0	3	3	2	3
sp|Q9DD18|DTD1_MOUSE	Dtd1	D-tyrosyl-tRNA(Tyr) deacylase 1 OS=Mus musculus GN=Dtd1 PE=1 SV=2	0	3	2	3	0	7	2	1	0	0	2	2	0	0	2	1
sp|Q9D2N4|DTNA_MOUSE	Dtna	Dystrobrevin alpha OS=Mus musculus GN=Dtna PE=1 SV=2	1	0	0	0	0	1	0	0	0	0	0	0	1	1	0	0
sp|Q8C2P3|DUS1L_MOUSE	Dus1l	tRNA-dihydrouridine(16/17) synthase [NAD(P)(+)]-like OS=Mus musculus GN=Dus1l PE=2 SV=1	0	1	0	0	0	0	0	0	0	0	0	0	0	0	0	0
sp|Q9D7X3|DUS3_MOUSE	Dusp3	Dual specificity protein phosphatase 3 OS=Mus musculus GN=Dusp3 PE=1 SV=1	0	1	0	0	0	6	0	0	0	0	0	0	0	0	0	0
sp|Q9JHU4|DYHC1_MOUSE	Dync1h1	Cytoplasmic dynein 1 heavy chain 1 OS=Mus musculus GN=Dync1h1 PE=1 SV=2	17	31	84	76	17	41	62	82	40	25	57	71	28	26	79	73
sp|O88485|DC1I1_MOUSE	Dync1i1	Cytoplasmic dynein 1 intermediate chain 1 OS=Mus musculus GN=Dync1i1 PE=1 SV=2	1	2	4	4	1	2	2	4	0	0	2	3	0	0	5	2
sp|O88487|DC1I2_MOUSE	Dync1i2	Cytoplasmic dynein 1 intermediate chain 2 OS=Mus musculus GN=Dync1i2 PE=1 SV=1	0	0	5	4	0	0	0	6	2	1	4	6	0	0	3	3
sp|Q8R1Q8|DC1L1_MOUSE	Dync1li1	Cytoplasmic dynein 1 light intermediate chain 1 OS=Mus musculus GN=Dync1li1 PE=1 SV=1	0	4	0	0	0	4	1	1	0	0	0	0	1	0	0	1
sp|Q6PDL0|DC1L2_MOUSE	Dync1li2	Cytoplasmic dynein 1 light intermediate chain 2 OS=Mus musculus GN=Dync1li2 PE=1 SV=2	0	5	2	2	0	2	0	3	0	0	0	1	0	0	2	1
sp|P63168|DYL1_MOUSE	Dynll1	Dynein light chain 1, cytoplasmic OS=Mus musculus GN=Dynll1 PE=1 SV=1	0	0	1	1	0	3	0	1	0	0	1	1	0	0	0	1
sp|Q9D0M5|DYL2_MOUSE	Dynll2	Dynein light chain 2, cytoplasmic OS=Mus musculus GN=Dynll2 PE=1 SV=1	0	0	0	0	0	0	0	0	0	0	1	0	0	0	0	0
sp|P62627|DLRB1_MOUSE	Dynlrb1	Dynein light chain roadblock-type 1 OS=Mus musculus GN=Dynlrb1 PE=1 SV=3	0	4	0	0	0	6	0	0	0	0	0	0	0	0	0	0
sp|P51807|DYLT1_MOUSE	Dynlt1	Dynein light chain Tctex-type 1 OS=Mus musculus GN=Dynlt1 PE=1 SV=1	0	0	0	0	0	2	0	0	0	0	0	0	0	0	0	0
sp|Q8BH95|ECHM_MOUSE	Echs1	Enoyl-CoA hydratase, mitochondrial OS=Mus musculus GN=Echs1 PE=1 SV=1	0	0	1	1	0	5	0	2	0	0	0	0	0	0	0	0
sp|P42125|ECI1_MOUSE	Eci1	Enoyl-CoA delta isomerase 1, mitochondrial OS=Mus musculus GN=Eci1 PE=1 SV=2	0	1	1	1	0	4	0	1	0	0	0	0	0	0	0	0
sp|Q9WUR2|ECI2_MOUSE	Eci2	Enoyl-CoA delta isomerase 2, mitochondrial OS=Mus musculus GN=Eci2 PE=1 SV=2	0	0	0	0	0	2	0	0	0	0	0	0	0	0	0	0
sp|O35474|EDIL3_MOUSE	Edil3	EGF-like repeat and discoidin I-like domain-containing protein 3 OS=Mus musculus GN=Edil3 PE=1 SV=2	0	0	0	0	0	0	0	1	0	0	1	0	0	0	0	0
sp|Q6GQV7|EDRF1_MOUSE	Edrf1	Erythroid differentiation-related factor 1 OS=Mus musculus GN=Edrf1 PE=1 SV=1	0	0	0	1	0	0	0	0	0	0	0	0	0	0	0	0
sp|Q8BL66|EEA1_MOUSE	Eea1	Early endosome antigen 1 OS=Mus musculus GN=Eea1 PE=1 SV=2	0	0	0	0	0	2	0	0	0	0	0	0	0	0	0	0
sp|P10126|EF1A1_MOUSE	Eef1a1	Elongation factor 1-alpha 1 OS=Mus musculus GN=Eef1a1 PE=1 SV=3	24	22	21	18	20	19	19	16	11	11	18	14	9	16	17	20
sp|P62631|EF1A2_MOUSE	Eef1a2	Elongation factor 1-alpha 2 OS=Mus musculus GN=Eef1a2 PE=1 SV=1	3	6	5	10	5	3	7	11	10	5	5	5	6	6	9	13
sp|O70251|EF1B_MOUSE	Eef1b	Elongation factor 1-beta OS=Mus musculus GN=Eef1b PE=1 SV=5	0	1	1	1	0	8	0	0	1	0	1	1	0	0	0	1
sp|P57776|EF1D_MOUSE	Eef1d	Elongation factor 1-delta OS=Mus musculus GN=Eef1d PE=1 SV=3	0	0	0	0	0	2	0	0	0	0	0	0	0	0	0	0
sp|Q9D8N0|EF1G_MOUSE	Eef1g	Elongation factor 1-gamma OS=Mus musculus GN=Eef1g PE=1 SV=3	0	0	2	3	1	0	0	4	0	0	2	2	3	0	2	0
sp|P58252|EF2_MOUSE	Eef2	Elongation factor 2 OS=Mus musculus GN=Eef2 PE=1 SV=2	0	1	11	5	0	4	2	13	4	0	2	4	2	0	5	7
sp|Q9D8Y0|EFHD2_MOUSE	Efhd2	EF-hand domain-containing protein D2 OS=Mus musculus GN=Efhd2 PE=1 SV=1	0	1	0	0	0	4	0	0	0	0	0	0	0	0	0	0
sp|Q6ZQ18|EFR3B_MOUSE	Efr3b	Protein EFR3 homolog B OS=Mus musculus GN=Efr3b PE=1 SV=2	0	1	1	2	0	0	0	1	0	0	0	0	0	0	1	1
sp|Q9WVK4|EHD1_MOUSE	Ehd1	EH domain-containing protein 1 OS=Mus musculus GN=Ehd1 PE=1 SV=1	0	1	0	0	0	2	0	0	0	0	0	0	0	0	0	1
sp|Q9QXY6|EHD3_MOUSE	Ehd3	EH domain-containing protein 3 OS=Mus musculus GN=Ehd3 PE=1 SV=2	0	0	0	0	0	1	0	0	0	0	0	0	0	0	0	0
sp|Q60872|IF1A_MOUSE	Eif1a	Eukaryotic translation initiation factor 1A OS=Mus musculus GN=Eif1a PE=2 SV=3	0	0	0	0	0	1	0	0	0	0	0	0	0	0	0	0
sp|Q6ZWX6|IF2A_MOUSE	Eif2s1	Eukaryotic translation initiation factor 2 subunit 1 OS=Mus musculus GN=Eif2s1 PE=1 SV=3	0	2	1	1	1	0	1	1	0	0	1	1	0	0	1	1
sp|Q99L45|IF2B_MOUSE	Eif2s2	Eukaryotic translation initiation factor 2 subunit 2 OS=Mus musculus GN=Eif2s2 PE=1 SV=1	0	0	0	0	0	1	0	0	0	0	0	0	0	0	0	0
sp|Q8JZQ9|EIF3B_MOUSE	Eif3b	Eukaryotic translation initiation factor 3 subunit B OS=Mus musculus GN=Eif3b PE=1 SV=1	0	0	0	0	0	0	0	0	2	0	0	0	0	0	0	0
sp|O70194|EIF3D_MOUSE	Eif3d	Eukaryotic translation initiation factor 3 subunit D OS=Mus musculus GN=Eif3d PE=1 SV=2	0	0	0	0	0	1	0	0	0	0	0	0	0	0	0	0
sp|Q91WK2|EIF3H_MOUSE	Eif3h	Eukaryotic translation initiation factor 3 subunit H OS=Mus musculus GN=Eif3h PE=1 SV=1	2	2	0	0	0	2	0	0	0	0	0	0	3	0	0	0
sp|Q9QZD9|EIF3I_MOUSE	Eif3i	Eukaryotic translation initiation factor 3 subunit I OS=Mus musculus GN=Eif3i PE=1 SV=1	0	0	0	0	0	2	0	0	0	0	0	0	0	0	0	0
sp|P60843|IF4A1_MOUSE	Eif4a1	Eukaryotic initiation factor 4A-I OS=Mus musculus GN=Eif4a1 PE=1 SV=1	0	3	3	2	0	2	0	4	0	0	0	3	0	1	2	0
sp|P10630|IF4A2_MOUSE	Eif4a2	Eukaryotic initiation factor 4A-II OS=Mus musculus GN=Eif4a2 PE=1 SV=2	3	6	11	9	0	14	6	11	2	3	7	5	1	4	5	7
sp|Q91VC3|IF4A3_MOUSE	Eif4a3	Eukaryotic initiation factor 4A-III OS=Mus musculus GN=Eif4a3 PE=1 SV=3	0	0	0	0	0	2	0	0	0	0	0	0	0	0	0	0
sp|Q8BGD9|IF4B_MOUSE	Eif4b	Eukaryotic translation initiation factor 4B OS=Mus musculus GN=Eif4b PE=1 SV=1	0	2	0	0	0	0	0	0	0	0	1	0	0	0	1	2
sp|Q6NZJ6|IF4G1_MOUSE	Eif4g1	Eukaryotic translation initiation factor 4 gamma 1 OS=Mus musculus GN=Eif4g1 PE=1 SV=1	0	0	0	0	0	0	0	0	0	0	1	0	0	0	0	0
sp|Q9WUK2|IF4H_MOUSE	Eif4h	Eukaryotic translation initiation factor 4H OS=Mus musculus GN=Eif4h PE=1 SV=3	0	1	0	0	0	7	1	0	0	0	0	0	1	0	0	0
sp|P63242|IF5A1_MOUSE	Eif5a	Eukaryotic translation initiation factor 5A-1 OS=Mus musculus GN=Eif5a PE=1 SV=2	0	1	0	0	0	0	0	0	0	0	0	0	1	0	0	0
sp|Q8BGY2|IF5A2_MOUSE	Eif5a2	Eukaryotic translation initiation factor 5A-2 OS=Mus musculus GN=Eif5a2 PE=1 SV=3	0	2	0	0	0	0	0	0	0	0	0	0	0	0	0	0
sp|O55135|IF6_MOUSE	Eif6	Eukaryotic translation initiation factor 6 OS=Mus musculus GN=Eif6 PE=1 SV=2	0	0	0	0	0	0	0	1	0	0	0	0	1	0	0	0
sp|P70372|ELAV1_MOUSE	Elavl1	ELAV-like protein 1 OS=Mus musculus GN=Elavl1 PE=1 SV=2	0	0	0	0	0	0	0	0	1	0	0	0	0	0	0	0
sp|Q60900|ELAV3_MOUSE	Elavl3	ELAV-like protein 3 OS=Mus musculus GN=Elavl3 PE=1 SV=1	0	0	0	1	0	4	0	1	2	0	1	1	0	0	1	1
sp|Q61701|ELAV4_MOUSE	Elavl4	ELAV-like protein 4 OS=Mus musculus GN=Elavl4 PE=1 SV=1	0	0	0	0	0	1	0	0	0	0	0	0	0	0	0	0
sp|P62869|ELOB_MOUSE	Elob	Elongin-B OS=Mus musculus GN=Elob PE=1 SV=1	0	3	0	0	0	5	0	0	0	0	0	0	0	0	0	0
sp|P83940|ELOC_MOUSE	Eloc	Elongin-C OS=Mus musculus GN=Eloc PE=1 SV=1	0	0	0	0	0	3	0	0	0	0	0	0	0	0	0	0
sp|Q8C7X2|EMC1_MOUSE	Emc1	ER membrane protein complex subunit 1 OS=Mus musculus GN=Emc1 PE=1 SV=1	1	0	0	0	0	0	0	0	0	0	0	0	0	0	0	1
sp|Q99KI3|EMC3_MOUSE	Emc3	ER membrane protein complex subunit 3 OS=Mus musculus GN=Emc3 PE=1 SV=3	0	0	0	0	0	3	0	0	0	0	0	0	0	0	0	0
sp|Q9CZX9|EMC4_MOUSE	Emc4	ER membrane protein complex subunit 4 OS=Mus musculus GN=Emc4 PE=1 SV=1	0	1	0	0	0	0	0	0	0	0	0	0	4	0	0	0
sp|Q05BC3|EMAL1_MOUSE	Eml1	Echinoderm microtubule-associated protein-like 1 OS=Mus musculus GN=Eml1 PE=1 SV=1	0	0	0	0	0	0	0	0	0	0	0	0	0	0	1	0
sp|Q7TNG5|EMAL2_MOUSE	Eml2	Echinoderm microtubule-associated protein-like 2 OS=Mus musculus GN=Eml2 PE=1 SV=1	0	0	0	1	0	0	0	0	0	0	0	0	0	0	0	2
sp|Q03173|ENAH_MOUSE	Enah	Protein enabled homolog OS=Mus musculus GN=Enah PE=1 SV=2	1	0	0	0	0	0	0	0	0	0	0	0	0	0	0	0
sp|Q8C522|ENDD1_MOUSE	Endod1	Endonuclease domain-containing 1 protein OS=Mus musculus GN=Endod1 PE=1 SV=2	0	0	0	1	0	1	0	1	0	0	0	1	0	0	1	1
sp|P17182|ENOA_MOUSE	Eno1	Alpha-enolase OS=Mus musculus GN=Eno1 PE=1 SV=3	12	43	25	28	15	63	24	21	19	9	23	22	17	20	17	24
sp|P17183|ENOG_MOUSE	Eno2	Gamma-enolase OS=Mus musculus GN=Eno2 PE=1 SV=2	5	26	10	12	7	38	11	9	14	5	10	6	11	11	11	13
sp|Q9EQG7|ENPP5_MOUSE	Enpp5	Ectonucleotide pyrophosphatase/phosphodiesterase family member 5 OS=Mus musculus GN=Enpp5 PE=1 SV=3	0	0	0	0	0	0	1	0	0	0	0	0	0	0	0	0
sp|P60840|ENSA_MOUSE	Ensa	Alpha-endosulfine OS=Mus musculus GN=Ensa PE=1 SV=1	1	0	0	0	0	0	0	0	0	0	0	0	0	0	0	0
sp|Q9Z2H5|E41L1_MOUSE	Epb41l1	Band 4.1-like protein 1 OS=Mus musculus GN=Epb41l1 PE=1 SV=2	5	13	15	17	3	21	7	22	10	8	15	13	4	7	16	20
sp|O70318|E41L2_MOUSE	Epb41l2	Band 4.1-like protein 2 OS=Mus musculus GN=Epb41l2 PE=1 SV=2	3	5	16	15	1	12	7	14	3	2	8	10	2	2	10	9
sp|Q9WV92|E41L3_MOUSE	Epb41l3	Band 4.1-like protein 3 OS=Mus musculus GN=Epb41l3 PE=1 SV=1	18	14	27	24	9	22	19	24	15	15	22	30	13	10	31	23
sp|Q99M71|EPDR1_MOUSE	Epdr1	Mammalian ependymin-related protein 1 OS=Mus musculus GN=Epdr1 PE=1 SV=1	1	0	1	0	0	3	0	0	0	0	1	0	1	1	0	0
sp|Q03137|EPHA4_MOUSE	Epha4	Ephrin type-A receptor 4 OS=Mus musculus GN=Epha4 PE=1 SV=2	0	0	1	0	0	0	1	1	0	0	0	0	0	0	1	0
sp|Q80VP1|EPN1_MOUSE	Epn1	Epsin-1 OS=Mus musculus GN=Epn1 PE=1 SV=3	0	0	0	0	0	3	0	0	0	0	0	0	0	0	0	0
sp|Q8CHU3|EPN2_MOUSE	Epn2	Epsin-2 OS=Mus musculus GN=Epn2 PE=1 SV=1	0	0	0	0	0	1	0	0	0	0	0	0	0	0	0	0
sp|Q8CGC7|SYEP_MOUSE	Eprs	Bifunctional glutamate/proline--tRNA ligase OS=Mus musculus GN=Eprs PE=1 SV=4	1	0	2	2	1	0	1	5	0	0	0	0	0	0	3	2
sp|Q60902|EP15R_MOUSE	Eps15l1	Epidermal growth factor receptor substrate 15-like 1 OS=Mus musculus GN=Eps15l1 PE=1 SV=3	0	1	0	0	0	2	0	0	0	0	0	0	0	0	0	0
sp|Q99MI1|RB6I2_MOUSE	Erc1	ELKS/Rab6-interacting/CAST family member 1 OS=Mus musculus GN=Erc1 PE=1 SV=1	0	0	0	0	0	3	0	0	0	0	0	0	0	0	0	0
sp|Q6PH08|ERC2_MOUSE	Erc2	ERC protein 2 OS=Mus musculus GN=Erc2 PE=1 SV=2	0	0	0	0	20	7	8	29	0	1	7	0	0	0	0	0
sp|Q5EBJ4|ERMIN_MOUSE	Ermn	Ermin OS=Mus musculus GN=Ermn PE=1 SV=1	0	0	0	0	0	1	0	0	0	0	0	0	1	0	0	0
sp|P57759|ERP29_MOUSE	Erp29	Endoplasmic reticulum resident protein 29 OS=Mus musculus GN=Erp29 PE=1 SV=2	0	0	0	0	0	1	0	0	0	0	0	0	0	0	0	0
sp|Q9R0P3|ESTD_MOUSE	Esd	S-formylglutathione hydrolase OS=Mus musculus GN=Esd PE=1 SV=1	1	5	3	3	0	3	0	3	1	0	1	0	2	1	0	6
sp|Q99LC5|ETFA_MOUSE	Etfa	Electron transfer flavoprotein subunit alpha, mitochondrial OS=Mus musculus GN=Etfa PE=1 SV=2	0	6	0	0	0	11	1	1	0	0	0	0	0	1	0	0
sp|Q9DCW4|ETFB_MOUSE	Etfb	Electron transfer flavoprotein subunit beta OS=Mus musculus GN=Etfb PE=1 SV=3	0	6	1	0	1	3	2	0	0	0	0	2	1	0	0	1
sp|Q921G7|ETFD_MOUSE	Etfdh	Electron transfer flavoprotein-ubiquinone oxidoreductase, mitochondrial OS=Mus musculus GN=Etfdh PE=1 SV=1	1	2	3	3	0	0	2	2	1	0	2	2	0	0	0	1
sp|P70429|EVL_MOUSE	Evl	Ena/VASP-like protein OS=Mus musculus GN=Evl PE=1 SV=2	0	1	0	0	1	0	0	0	0	0	0	0	1	0	0	0
sp|O35382|EXOC4_MOUSE	Exoc4	Exocyst complex component 4 OS=Mus musculus GN=Exoc4 PE=1 SV=2	0	0	1	0	0	0	0	2	0	0	1	0	0	0	0	0
sp|Q6PGF7|EXOC8_MOUSE	Exoc8	Exocyst complex component 8 OS=Mus musculus GN=Exoc8 PE=1 SV=1	0	0	0	1	0	0	0	0	0	0	0	0	0	0	0	0
sp|Q8C163|EXOG_MOUSE	Exog	Nuclease EXOG, mitochondrial OS=Mus musculus GN=Exog PE=1 SV=1	0	0	0	0	0	3	0	0	0	0	0	0	0	0	0	0
sp|P26040|EZRI_MOUSE	Ezr	Ezrin OS=Mus musculus GN=Ezr PE=1 SV=3	0	0	0	0	0	6	0	1	0	0	0	0	0	0	0	1
sp|P11404|FABPH_MOUSE	Fabp3	Fatty acid-binding protein, heart OS=Mus musculus GN=Fabp3 PE=1 SV=5	0	6	0	1	0	3	1	0	0	0	0	0	0	0	0	0
sp|Q05816|FABP5_MOUSE	Fabp5	Fatty acid-binding protein, epidermal OS=Mus musculus GN=Fabp5 PE=1 SV=3	0	3	0	0	0	8	1	1	0	0	0	0	0	0	0	1
sp|P51880|FABP7_MOUSE	Fabp7	Fatty acid-binding protein, brain OS=Mus musculus GN=Fabp7 PE=1 SV=2	0	0	1	0	0	2	1	0	1	0	0	1	1	0	0	0
sp|P35505|FAAA_MOUSE	Fah	Fumarylacetoacetase OS=Mus musculus GN=Fah PE=1 SV=2	0	0	0	0	0	0	0	2	0	0	0	0	0	0	0	0
sp|Q8R0F8|FAHD1_MOUSE	Fahd1	Acylpyruvase FAHD1, mitochondrial OS=Mus musculus GN=Fahd1 PE=1 SV=2	0	0	0	0	0	2	0	0	0	0	0	0	0	0	0	0
sp|Q3TC72|FAHD2_MOUSE	Fahd2	Fumarylacetoacetate hydrolase domain-containing protein 2A OS=Mus musculus GN=Fahd2 PE=1 SV=1	0	1	0	1	0	4	0	2	0	0	1	0	0	0	2	2
sp|Q8K097|LFG2_MOUSE	Faim2	Protein lifeguard 2 OS=Mus musculus GN=Faim2 PE=2 SV=1	0	0	0	2	0	0	0	1	0	0	0	1	0	0	0	0
sp|Q6A0A9|F120A_MOUSE	FAM120A	Constitutive coactivator of PPAR-gamma-like protein 1 OS=Mus musculus GN=FAM120A PE=1 SV=2	0	0	1	1	0	0	0	0	0	0	0	0	0	0	1	0
sp|Q9D6U8|F162A_MOUSE	Fam162a	Protein FAM162A OS=Mus musculus GN=Fam162a PE=1 SV=1	0	0	0	0	0	1	0	0	0	0	0	0	0	0	0	0
sp|Q14CH0|F171B_MOUSE	Fam171b	Protein FAM171B OS=Mus musculus GN=Fam171b PE=1 SV=2	0	0	0	0	0	2	0	0	0	0	0	0	0	0	0	0
sp|Q9CYH2|F213A_MOUSE	Fam213a	Redox-regulatory protein FAM213A OS=Mus musculus GN=Fam213a PE=1 SV=2	1	2	2	3	0	4	2	3	3	0	3	2	3	0	3	3
sp|Q8BYI8|F234B_MOUSE	Fam234b	Protein FAM234B OS=Mus musculus GN=Fam234b PE=1 SV=1	0	0	0	0	0	1	0	0	0	0	0	0	0	0	0	0
sp|Q8BHZ0|FA49A_MOUSE	Fam49a	Protein FAM49A OS=Mus musculus GN=Fam49a PE=1 SV=1	0	2	2	2	0	2	2	3	6	0	3	3	0	0	2	3
sp|Q921M7|FA49B_MOUSE	Fam49b	Protein FAM49B OS=Mus musculus GN=Fam49b PE=1 SV=1	2	6	7	9	0	14	4	10	3	7	3	6	4	6	7	7
sp|Q9D7I8|FA83D_MOUSE	Fam83d	Protein FAM83D OS=Mus musculus GN=Fam83d PE=2 SV=1	0	0	0	0	0	1	0	0	0	0	0	0	0	0	0	0
sp|Q80VD1|FA98B_MOUSE	Fam98b	Protein FAM98B OS=Mus musculus GN=Fam98b PE=1 SV=1	0	0	0	0	0	3	0	0	0	0	0	0	0	0	0	0
sp|F8VPU2|FARP1_MOUSE	Farp1	FERM, RhoGEF and pleckstrin domain-containing protein 1 OS=Mus musculus GN=Farp1 PE=1 SV=1	0	0	1	1	0	2	2	1	1	0	0	0	1	1	0	0
sp|Q8C0C7|SYFA_MOUSE	Farsa	Phenylalanine--tRNA ligase alpha subunit OS=Mus musculus GN=Farsa PE=1 SV=1	0	0	0	0	0	1	0	0	0	0	0	0	0	0	0	0
sp|P19096|FAS_MOUSE	Fasn	Fatty acid synthase OS=Mus musculus GN=Fasn PE=1 SV=2	0	7	15	13	0	7	8	9	3	3	13	10	6	6	15	12
sp|Q08879|FBLN1_MOUSE	Fbln1	Fibulin-1 OS=Mus musculus GN=Fbln1 PE=1 SV=2	0	0	0	0	0	0	0	0	0	0	0	0	2	2	0	0
sp|A2RT62|FXL16_MOUSE	Fbxl16	F-box/LRR-repeat protein 16 OS=Mus musculus GN=Fbxl16 PE=1 SV=1	0	1	5	1	0	1	0	4	0	1	1	2	0	1	3	2
sp|Q78JE5|FBX22_MOUSE	Fbxo22	F-box only protein 22 OS=Mus musculus GN=Fbxo22 PE=1 SV=2	0	2	0	0	0	0	0	0	0	0	0	0	0	0	0	0
sp|P59113|FERM1_MOUSE	Fermt1	Fermitin family homolog 1 OS=Mus musculus GN=Fermt1 PE=1 SV=4	0	0	0	0	0	0	0	0	0	0	0	0	0	4	0	0
sp|Q8CIB5|FERM2_MOUSE	Fermt2	Fermitin family homolog 2 OS=Mus musculus GN=Fermt2 PE=1 SV=1	0	0	0	0	0	1	0	0	0	0	0	0	0	2	1	0
sp|E9PV24|FIBA_MOUSE	Fga	Fibrinogen alpha chain OS=Mus musculus GN=Fga PE=1 SV=1	0	0	0	0	0	2	0	0	0	0	0	0	0	0	0	0
sp|Q69ZL1|FGD6_MOUSE	Fgd6	FYVE, RhoGEF and PH domain-containing protein 6 OS=Mus musculus GN=Fgd6 PE=1 SV=2	0	0	0	0	0	0	1	0	0	0	0	0	0	0	0	0
sp|Q8VCM7|FIBG_MOUSE	Fgg	Fibrinogen gamma chain OS=Mus musculus GN=Fgg PE=1 SV=1	0	0	0	0	0	2	0	0	0	0	0	0	0	0	0	0
sp|P97807|FUMH_MOUSE	Fh	Fumarate hydratase, mitochondrial OS=Mus musculus GN=Fh PE=1 SV=3	0	14	0	4	0	15	2	3	1	0	0	2	1	0	3	5
sp|P97447|FHL1_MOUSE	Fhl1	Four and a half LIM domains protein 1 OS=Mus musculus GN=Fhl1 PE=1 SV=3	0	0	1	1	0	0	2	1	0	2	1	1	0	0	1	1
sp|Q9CQ92|FIS1_MOUSE	Fis1	Mitochondrial fission 1 protein OS=Mus musculus GN=Fis1 PE=1 SV=1	0	1	1	1	0	1	2	1	0	1	3	2	0	0	1	1
sp|P26883|FKB1A_MOUSE	Fkbp1a	Peptidyl-prolyl cis-trans isomerase FKBP1A OS=Mus musculus GN=Fkbp1a PE=1 SV=2	0	2	1	3	0	3	2	1	1	0	1	1	0	2	0	2
sp|P45878|FKBP2_MOUSE	Fkbp2	Peptidyl-prolyl cis-trans isomerase FKBP2 OS=Mus musculus GN=Fkbp2 PE=1 SV=1	0	4	2	0	0	2	0	0	0	1	2	3	0	0	1	1
sp|P30416|FKBP4_MOUSE	Fkbp4	Peptidyl-prolyl cis-trans isomerase FKBP4 OS=Mus musculus GN=Fkbp4 PE=1 SV=5	1	0	0	0	0	2	0	0	0	0	0	0	0	0	0	0
sp|O35465|FKBP8_MOUSE	Fkbp8	Peptidyl-prolyl cis-trans isomerase FKBP8 OS=Mus musculus GN=Fkbp8 PE=1 SV=2	0	0	2	0	0	1	0	2	0	0	0	1	0	0	0	1
sp|Q8BTM8|FLNA_MOUSE	Flna	Filamin-A OS=Mus musculus GN=Flna PE=1 SV=5	0	0	0	0	0	0	0	0	0	0	0	0	0	0	0	1
sp|Q9JL04|FMN2_MOUSE	Fmn2	Formin-2 OS=Mus musculus GN=Fmn2 PE=1 SV=2	0	0	0	0	0	0	0	0	0	0	0	0	0	1	0	0
sp|P35922|FMR1_MOUSE	Fmr1	Synaptic functional regulator FMR1 OS=Mus musculus GN=Fmr1 PE=1 SV=1	1	0	0	0	0	0	0	0	0	0	0	0	0	0	0	0
sp|P11276|FINC_MOUSE	Fn1	Fibronectin OS=Mus musculus GN=Fn1 PE=1 SV=4	0	2	0	0	1	1	0	0	1	1	1	0	1	0	0	0
sp|Q61553|FSCN1_MOUSE	Fscn1	Fascin OS=Mus musculus GN=Fscn1 PE=1 SV=4	4	5	8	0	3	9	5	9	10	6	8	8	3	5	8	7
sp|Q7TPM6|FSD1_MOUSE	Fsd1	Fibronectin type III and SPRY domain-containing protein 1 OS=Mus musculus GN=Fsd1 PE=1 SV=1	0	0	0	1	0	2	0	0	0	0	0	0	0	0	0	0
sp|P09528|FRIH_MOUSE	Fth1	Ferritin heavy chain OS=Mus musculus GN=Fth1 PE=1 SV=2	0	0	0	1	0	0	2	0	0	0	0	0	0	0	0	0
sp|Q91WJ8|FUBP1_MOUSE	Fubp1	Far upstream element-binding protein 1 OS=Mus musculus GN=Fubp1 PE=1 SV=1	0	0	0	0	0	1	0	0	0	0	0	0	0	0	0	0
sp|Q9DB70|FUND1_MOUSE	Fundc1	FUN14 domain-containing protein 1 OS=Mus musculus GN=Fundc1 PE=1 SV=1	0	0	0	0	0	0	0	0	1	0	0	0	0	1	0	0
sp|Q9D6K8|FUND2_MOUSE	Fundc2	FUN14 domain-containing protein 2 OS=Mus musculus GN=Fundc2 PE=1 SV=1	0	0	1	0	0	0	0	1	0	1	1	2	0	0	0	0
sp|Q9D164|FXYD6_MOUSE	Fxyd6	FXYD domain-containing ion transport regulator 6 OS=Mus musculus GN=Fxyd6 PE=1 SV=2	1	10	0	4	0	5	2	2	1	0	3	0	2	2	0	3
sp|P59648|FXYD7_MOUSE	Fxyd7	FXYD domain-containing ion transport regulator 7 OS=Mus musculus GN=Fxyd7 PE=3 SV=1	0	1	0	0	0	0	0	0	0	0	0	0	0	0	0	0
sp|P39688|FYN_MOUSE	Fyn	Tyrosine-protein kinase Fyn OS=Mus musculus GN=Fyn PE=1 SV=4	0	0	1	0	0	0	0	0	0	0	0	0	0	0	0	0
sp|Q00612|G6PD1_MOUSE	G6pdx	Glucose-6-phosphate 1-dehydrogenase X OS=Mus musculus GN=G6pdx PE=1 SV=3	0	0	0	0	0	0	0	1	0	0	0	0	0	0	0	0
sp|P70699|LYAG_MOUSE	Gaa	Lysosomal alpha-glucosidase OS=Mus musculus GN=Gaa PE=1 SV=2	0	0	0	0	0	1	0	0	0	0	0	0	0	0	0	0
sp|Q9WV18|GABR1_MOUSE	Gabbr1	Gamma-aminobutyric acid type B receptor subunit 1 OS=Mus musculus GN=Gabbr1 PE=1 SV=1	0	0	1	1	1	0	0	2	0	0	1	1	0	0	1	0
sp|Q80T41|GABR2_MOUSE	Gabbr2	Gamma-aminobutyric acid type B receptor subunit 2 OS=Mus musculus GN=Gabbr2 PE=1 SV=2	0	0	2	5	0	0	2	2	0	0	4	5	0	2	1	0
sp|P62812|GBRA1_MOUSE	Gabra1	Gamma-aminobutyric acid receptor subunit alpha-1 OS=Mus musculus GN=Gabra1 PE=1 SV=1	0	2	2	1	0	0	1	2	1	0	2	2	0	0	1	1
sp|P26049|GBRA3_MOUSE	Gabra3	Gamma-aminobutyric acid receptor subunit alpha-3 OS=Mus musculus GN=Gabra3 PE=1 SV=1	0	0	2	0	0	2	0	0	0	0	0	0	0	0	0	0
sp|P50571|GBRB1_MOUSE	Gabrb1	Gamma-aminobutyric acid receptor subunit beta-1 OS=Mus musculus GN=Gabrb1 PE=1 SV=1	0	0	0	0	0	0	0	0	2	0	0	0	0	0	0	0
sp|P63137|GBRB2_MOUSE	Gabrb2	Gamma-aminobutyric acid receptor subunit beta-2 OS=Mus musculus GN=Gabrb2 PE=1 SV=2	0	0	3	1	0	0	1	1	0	0	3	3	1	0	2	1
sp|P63080|GBRB3_MOUSE	Gabrb3	Gamma-aminobutyric acid receptor subunit beta-3 OS=Mus musculus GN=Gabrb3 PE=2 SV=1	0	0	0	5	0	0	0	0	0	0	0	0	0	0	2	0
sp|P22723|GBRG2_MOUSE	Gabrg2	Gamma-aminobutyric acid receptor subunit gamma-2 OS=Mus musculus GN=Gabrg2 PE=1 SV=3	0	0	0	0	0	1	0	0	1	0	0	0	0	0	0	0
sp|P48318|DCE1_MOUSE	Gad1	Glutamate decarboxylase 1 OS=Mus musculus GN=Gad1 PE=1 SV=2	0	2	0	0	0	1	0	2	1	0	1	0	0	0	1	1
sp|P48320|DCE2_MOUSE	Gad2	Glutamate decarboxylase 2 OS=Mus musculus GN=Gad2 PE=1 SV=1	0	0	0	0	0	3	0	4	0	0	0	0	0	0	0	0
sp|Q99KY4|GAK_MOUSE	Gak	Cyclin-G-associated kinase OS=Mus musculus GN=Gak PE=1 SV=2	0	0	2	1	0	0	0	0	4	0	0	1	2	2	0	0
sp|Q8BHN3|GANAB_MOUSE	Ganab	Neutral alpha-glucosidase AB OS=Mus musculus GN=Ganab PE=1 SV=1	0	0	0	0	0	0	0	2	0	0	1	0	0	0	0	0
sp|P06837|NEUM_MOUSE	Gap43	Neuromodulin OS=Mus musculus GN=Gap43 PE=1 SV=1	11	11	8	12	7	18	16	10	11	11	10	11	8	10	14	12
sp|P16858|G3P_MOUSE	Gapdh	Glyceraldehyde-3-phosphate dehydrogenase OS=Mus musculus GN=Gapdh PE=1 SV=2	44	60	48	46	59	42	47	51	25	25	33	41	72	44	44	42
sp|Q9CZD3|GARS_MOUSE	Gars	Glycine--tRNA ligase OS=Mus musculus GN=Gars PE=1 SV=1	0	2	0	0	0	0	0	0	0	0	0	0	0	0	0	0
sp|Q64737|PUR2_MOUSE	Gart	Trifunctional purine biosynthetic protein adenosine-3 OS=Mus musculus GN=Gart PE=1 SV=3	0	1	0	0	0	0	0	0	0	0	0	0	0	0	0	0
sp|Q60780|GAS7_MOUSE	Gas7	Growth arrest-specific protein 7 OS=Mus musculus GN=Gas7 PE=1 SV=1	0	0	0	0	0	3	0	0	0	0	0	0	0	0	0	0
sp|Q8BFQ8|GALD1_MOUSE	Gatd1	Glutamine amidotransferase-like class 1 domain-containing protein 1 OS=Mus musculus GN=Gatd1 PE=1 SV=1	0	0	0	0	0	0	0	0	0	0	0	0	0	0	1	1
sp|P21614|VTDB_MOUSE	Gc	Vitamin D-binding protein OS=Mus musculus GN=Gc PE=1 SV=2	0	0	0	0	0	1	0	0	0	1	0	0	0	0	0	0
sp|Q9R111|GUAD_MOUSE	Gda	Guanine deaminase OS=Mus musculus GN=Gda PE=1 SV=1	0	8	6	9	0	17	2	5	5	1	5	3	2	3	6	8
sp|O88741|GDAP1_MOUSE	Gdap1	Ganglioside-induced differentiation-associated protein 1 OS=Mus musculus GN=Gdap1 PE=1 SV=1	1	1	10	5	8	8	6	5	6	0	7	4	1	3	7	5
sp|Q8VE33|GD1L1_MOUSE	Gdap1l1	Ganglioside-induced differentiation-associated protein 1-like 1 OS=Mus musculus GN=Gdap1l1 PE=1 SV=1	1	4	2	3	3	0	1	3	0	0	2	2	0	0	5	1
sp|Q9JL56|GDE1_MOUSE	Gde1	Glycerophosphodiester phosphodiesterase 1 OS=Mus musculus GN=Gde1 PE=1 SV=1	0	0	0	0	0	0	0	0	2	0	0	0	0	0	0	0
sp|P50396|GDIA_MOUSE	Gdi1	Rab GDP dissociation inhibitor alpha OS=Mus musculus GN=Gdi1 PE=1 SV=3	30	47	34	27	33	47	27	37	38	38	28	31	42	41	26	30
sp|Q61598|GDIB_MOUSE	Gdi2	Rab GDP dissociation inhibitor beta OS=Mus musculus GN=Gdi2 PE=1 SV=1	4	8	10	12	9	4	3	12	16	1	8	11	8	10	12	12
sp|Q9CRY7|GDPD1_MOUSE	Gdpd1	Glycerophosphodiester phosphodiesterase domain-containing protein 1 OS=Mus musculus GN=Gdpd1 PE=1 SV=1	0	0	3	2	0	0	1	1	0	0	0	2	0	0	0	0
sp|Q9D1H7|GET4_MOUSE	Get4	Golgi to ER traffic protein 4 homolog OS=Mus musculus GN=Get4 PE=1 SV=2	0	1	0	0	0	0	0	1	0	0	0	0	0	0	0	1
sp|P03995|GFAP_MOUSE	Gfap	Glial fibrillary acidic protein OS=Mus musculus GN=Gfap PE=1 SV=4	0	7	0	0	0	11	0	0	0	0	0	0	0	1	0	0
sp|Q8BMI3|GGA3_MOUSE	Gga3	ADP-ribosylation factor-binding protein GGA3 OS=Mus musculus GN=Gga3 PE=1 SV=2	0	0	0	0	0	2	0	0	0	0	0	0	0	0	0	0
sp|Q9D7X8|GGCT_MOUSE	Ggct	Gamma-glutamylcyclotransferase OS=Mus musculus GN=Ggct PE=1 SV=1	0	2	1	1	0	2	1	1	0	0	1	1	0	0	1	1
sp|Q99JP7|GGT7_MOUSE	Ggt7	Gamma-glutamyltransferase 7 OS=Mus musculus GN=Ggt7 PE=1 SV=2	0	0	0	0	0	1	0	1	0	0	0	1	0	0	1	0
sp|Q91VC9|GHITM_MOUSE	Ghitm	Growth hormone-inducible transmembrane protein OS=Mus musculus GN=Ghitm PE=1 SV=1	0	0	0	0	0	1	0	1	0	0	1	1	0	0	0	0
sp|P23242|CXA1_MOUSE	Gja1	Gap junction alpha-1 protein OS=Mus musculus GN=Gja1 PE=1 SV=2	0	5	11	9	0	9	7	12	1	2	7	8	0	0	10	8
sp|Q921C1|CXG3_MOUSE	Gjc3	Gap junction gamma-3 protein OS=Mus musculus GN=Gjc3 PE=1 SV=2	0	0	1	1	0	0	0	0	1	1	0	0	0	0	0	0
sp|Q9CPU0|LGUL_MOUSE	Glo1	Lactoylglutathione lyase OS=Mus musculus GN=Glo1 PE=1 SV=3	0	7	1	3	0	8	0	1	0	0	0	1	0	0	1	0
sp|Q9CPV4|GLOD4_MOUSE	Glod4	Glyoxalase domain-containing protein 4 OS=Mus musculus GN=Glod4 PE=1 SV=1	0	0	1	2	0	5	0	2	0	1	0	1	0	0	0	1
sp|Q9QUH0|GLRX1_MOUSE	Glrx	Glutaredoxin-1 OS=Mus musculus GN=Glrx PE=1 SV=3	0	0	0	1	0	0	0	0	0	0	0	0	0	0	1	0
sp|Q9CQM9|GLRX3_MOUSE	Glrx3	Glutaredoxin-3 OS=Mus musculus GN=Glrx3 PE=1 SV=1	0	1	1	1	0	0	0	0	0	0	0	0	0	0	0	0
sp|Q80Y14|GLRX5_MOUSE	Glrx5	Glutaredoxin-related protein 5, mitochondrial OS=Mus musculus GN=Glrx5 PE=1 SV=2	0	0	0	0	0	0	0	0	0	0	0	0	1	0	0	0
sp|D3Z7P3|GLSK_MOUSE	Gls	Glutaminase kidney isoform, mitochondrial OS=Mus musculus GN=Gls PE=1 SV=1	0	5	10	7	0	7	7	9	3	0	9	8	3	6	8	8
sp|Q9JL62|GLTP_MOUSE	Gltp	Glycolipid transfer protein OS=Mus musculus GN=Gltp PE=1 SV=3	0	1	0	0	0	1	0	0	0	0	0	0	1	0	0	0
sp|P26443|DHE3_MOUSE	Glud1	Glutamate dehydrogenase 1, mitochondrial OS=Mus musculus GN=Glud1 PE=1 SV=1	4	32	27	21	4	33	19	17	6	6	22	16	8	9	14	14
sp|P15105|GLNA_MOUSE	Glul	Glutamine synthetase OS=Mus musculus GN=Glul PE=1 SV=6	4	6	7	8	5	5	8	9	3	2	6	3	4	3	7	4
tr|Q8CDD5|Q8CDD5_MOUSE	Gm6583	Putative uncharacterized protein OS=Mus musculus GN=Gm6583 PE=2 SV=1	0	0	0	0	0	0	0	0	0	0	0	1	0	0	0	0
sp|A2AJA9|CI172_MOUSE	Gm996	Uncharacterized protein C9orf172 homolog OS=Mus musculus GN=Gm996 PE=1 SV=1	0	0	1	2	0	0	0	2	0	0	1	1	0	0	1	1
sp|Q9CQI3|GMFB_MOUSE	Gmfb	Glia maturation factor beta OS=Mus musculus GN=Gmfb PE=1 SV=3	0	4	0	0	0	3	0	0	1	1	0	0	1	0	1	1
sp|Q9ERL7|GMFG_MOUSE	Gmfg	Glia maturation factor gamma OS=Mus musculus GN=Gmfg PE=1 SV=1	0	0	0	0	0	3	0	0	1	0	0	0	0	0	0	0
sp|Q3THK7|GUAA_MOUSE	Gmps	GMP synthase [glutamine-hydrolyzing] OS=Mus musculus GN=Gmps PE=1 SV=2	0	0	0	0	0	1	0	0	0	0	0	0	0	0	0	0
sp|P21278|GNA11_MOUSE	Gna11	Guanine nucleotide-binding protein subunit alpha-11 OS=Mus musculus GN=Gna11 PE=1 SV=1	0	0	2	2	0	2	0	0	0	0	0	1	0	0	1	0
sp|B2RSH2|GNAI1_MOUSE	Gnai1	Guanine nucleotide-binding protein G(i) subunit alpha-1 OS=Mus musculus GN=Gnai1 PE=1 SV=1	4	5	6	4	3	9	5	2	0	0	4	3	5	4	5	5
sp|P08752|GNAI2_MOUSE	Gnai2	Guanine nucleotide-binding protein G(i) subunit alpha-2 OS=Mus musculus GN=Gnai2 PE=1 SV=5	1	8	4	4	3	21	5	5	3	3	4	4	2	13	5	5
sp|Q9DC51|GNAI3_MOUSE	Gnai3	Guanine nucleotide-binding protein G(k) subunit alpha OS=Mus musculus GN=Gnai3 PE=1 SV=3	0	0	3	2	0	1	1	1	0	0	2	1	0	1	2	0
sp|Q8CGK7|GNAL_MOUSE	Gnal	Guanine nucleotide-binding protein G(olf) subunit alpha OS=Mus musculus GN=Gnal PE=1 SV=1	0	0	3	4	0	6	0	0	0	0	0	3	0	0	0	3
sp|P18872|GNAO_MOUSE	Gnao1	Guanine nucleotide-binding protein G(o) subunit alpha OS=Mus musculus GN=Gnao1 PE=1 SV=3	24	33	21	24	15	28	13	26	17	17	14	19	10	18	20	27
sp|P21279|GNAQ_MOUSE	Gnaq	Guanine nucleotide-binding protein G(q) subunit alpha OS=Mus musculus GN=Gnaq PE=1 SV=4	0	2	1	0	0	6	0	0	0	0	0	0	1	0	0	0
sp|Q6R0H7|GNAS1_MOUSE	Gnas	Guanine nucleotide-binding protein G(s) subunit alpha isoforms XLas OS=Mus musculus GN=Gnas PE=1 SV=1	0	2	0	0	0	4	1	1	0	0	0	1	0	2	0	0
sp|Q3V3I2|GNAT3_MOUSE	Gnat3	Guanine nucleotide-binding protein G(t) subunit alpha-3 OS=Mus musculus GN=Gnat3 PE=1 SV=2	0	0	4	4	0	0	3	3	0	2	0	4	0	0	0	4
sp|O70443|GNAZ_MOUSE	Gnaz	Guanine nucleotide-binding protein G(z) subunit alpha OS=Mus musculus GN=Gnaz PE=1 SV=4	1	1	5	6	1	2	4	6	5	2	3	4	3	3	7	8
sp|P62874|GBB1_MOUSE	Gnb1	Guanine nucleotide-binding protein G(I)/G(S)/G(T) subunit beta-1 OS=Mus musculus GN=Gnb1 PE=1 SV=3	3	6	5	4	1	13	3	5	4	0	4	6	2	7	4	6
sp|P62881|GNB5_MOUSE	Gnb5	Guanine nucleotide-binding protein subunit beta-5 OS=Mus musculus GN=Gnb5 PE=1 SV=1	0	0	4	4	0	3	3	5	0	0	2	2	0	0	3	4
sp|Q9DAS9|GBG12_MOUSE	Gng12	Guanine nucleotide-binding protein G(I)/G(S)/G(O) subunit gamma-12 OS=Mus musculus GN=Gng12 PE=1 SV=3	0	0	0	0	0	1	0	0	1	0	0	0	0	0	0	0
sp|P63213|GBG2_MOUSE	Gng2	Guanine nucleotide-binding protein G(I)/G(S)/G(O) subunit gamma-2 OS=Mus musculus GN=Gng2 PE=1 SV=2	0	3	2	1	0	3	4	1	1	1	1	2	0	0	0	1
sp|P63216|GBG3_MOUSE	Gng3	Guanine nucleotide-binding protein G(I)/G(S)/G(O) subunit gamma-3 OS=Mus musculus GN=Gng3 PE=1 SV=1	0	2	1	1	0	4	1	1	1	3	1	1	0	0	1	1
sp|P50153|GBG4_MOUSE	Gng4	Guanine nucleotide-binding protein G(I)/G(S)/G(O) subunit gamma-4 OS=Mus musculus GN=Gng4 PE=1 SV=1	0	2	0	0	0	0	0	0	0	0	0	0	0	0	0	0
sp|Q61016|GBG7_MOUSE	Gng7	Guanine nucleotide-binding protein G(I)/G(S)/G(O) subunit gamma-7 OS=Mus musculus GN=Gng7 PE=1 SV=2	1	3	0	0	2	3	2	1	1	0	0	0	0	0	1	1
sp|P36916|GNL1_MOUSE	Gnl1	Guanine nucleotide-binding protein-like 1 OS=Mus musculus GN=Gnl1 PE=1 SV=4	0	0	2	2	0	0	0	1	0	0	1	1	0	0	0	1
sp|O88958|GNPI1_MOUSE	Gnpda1	Glucosamine-6-phosphate isomerase 1 OS=Mus musculus GN=Gnpda1 PE=1 SV=3	0	1	0	0	0	1	0	0	0	0	0	0	0	0	1	0
sp|Q9CRC9|GNPI2_MOUSE	Gnpda2	Glucosamine-6-phosphate isomerase 2 OS=Mus musculus GN=Gnpda2 PE=1 SV=1	0	0	1	0	0	0	0	0	0	0	0	1	0	0	0	0
sp|P05201|AATC_MOUSE	Got1	Aspartate aminotransferase, cytoplasmic OS=Mus musculus GN=Got1 PE=1 SV=3	1	17	6	9	0	17	7	11	8	4	6	6	7	6	9	9
sp|P05202|AATM_MOUSE	Got2	Aspartate aminotransferase, mitochondrial OS=Mus musculus GN=Got2 PE=1 SV=1	3	23	7	8	2	20	15	8	8	8	11	8	22	6	6	8
sp|P13707|GPDA_MOUSE	Gpd1	Glycerol-3-phosphate dehydrogenase [NAD(+)], cytoplasmic OS=Mus musculus GN=Gpd1 PE=1 SV=3	0	0	1	2	0	0	0	2	0	0	0	0	0	0	0	1
sp|Q3ULJ0|GPD1L_MOUSE	Gpd1l	Glycerol-3-phosphate dehydrogenase 1-like protein OS=Mus musculus GN=Gpd1l PE=1 SV=2	0	1	2	1	0	1	0	3	0	0	0	0	0	0	1	1
sp|Q64521|GPDM_MOUSE	Gpd2	Glycerol-3-phosphate dehydrogenase, mitochondrial OS=Mus musculus GN=Gpd2 PE=1 SV=2	0	3	7	8	0	6	4	10	3	0	5	3	2	0	2	7
sp|Q8BUV3|GEPH_MOUSE	Gphn	Gephyrin OS=Mus musculus GN=Gphn PE=1 SV=2	0	3	3	5	0	3	1	5	0	0	2	0	0	0	2	3
sp|P06745|G6PI_MOUSE	Gpi	Glucose-6-phosphate isomerase OS=Mus musculus GN=Gpi PE=1 SV=4	0	10	6	8	0	6	6	7	2	3	3	3	13	0	4	8
sp|P35802|GPM6A_MOUSE	Gpm6a	Neuronal membrane glycoprotein M6-a OS=Mus musculus GN=Gpm6a PE=1 SV=1	0	0	2	3	1	2	4	3	0	1	3	3	2	0	2	2
sp|P35803|GPM6B_MOUSE	Gpm6b	Neuronal membrane glycoprotein M6-b OS=Mus musculus GN=Gpm6b PE=1 SV=2	1	3	8	6	0	4	5	8	1	3	4	9	3	6	8	8
sp|Q8C419|GP158_MOUSE	Gpr158	Probable G-protein coupled receptor 158 OS=Mus musculus GN=Gpr158 PE=1 SV=2	2	0	9	6	3	7	10	7	2	0	12	7	7	2	7	9
sp|Q8BYC4|GPR20_MOUSE	Gpr20	G-protein coupled receptor 20 OS=Mus musculus GN=Gpr20 PE=2 SV=1	0	0	0	0	0	0	0	0	0	0	0	1	0	0	0	0
sp|Q9QY42|GPR37_MOUSE	Gpr37	Prosaposin receptor GPR37 OS=Mus musculus GN=Gpr37 PE=2 SV=1	0	0	1	1	0	0	1	1	1	0	1	1	0	0	1	1
sp|Q3UNH4|GRIN1_MOUSE	Gprin1	G protein-regulated inducer of neurite outgrowth 1 OS=Mus musculus GN=Gprin1 PE=1 SV=2	0	0	1	2	2	0	3	0	0	0	2	3	0	2	3	1
sp|Q99LD4|CSN1_MOUSE	Gps1	COP9 signalosome complex subunit 1 OS=Mus musculus GN=Gps1 PE=1 SV=1	0	1	0	0	0	0	0	0	0	0	0	0	0	0	0	2
sp|P11352|GPX1_MOUSE	Gpx1	Glutathione peroxidase 1 OS=Mus musculus GN=Gpx1 PE=1 SV=2	0	1	0	0	0	2	0	0	0	0	0	0	0	0	0	0
sp|O70325|GPX41_MOUSE	Gpx4	Phospholipid hydroperoxide glutathione peroxidase, mitochondrial OS=Mus musculus GN=Gpx4 PE=1 SV=4	0	0	1	1	0	5	0	2	2	0	2	1	1	1	1	1
sp|Q60631|GRB2_MOUSE	Grb2	Growth factor receptor-bound protein 2 OS=Mus musculus GN=Grb2 PE=1 SV=1	0	1	0	0	0	1	0	0	0	0	0	0	0	0	0	0
sp|Q91Z53|GRHPR_MOUSE	Grhpr	Glyoxylate reductase/hydroxypyruvate reductase OS=Mus musculus GN=Grhpr PE=1 SV=1	0	1	0	0	0	4	1	0	0	0	0	0	0	0	0	0
sp|P23818|GRIA1_MOUSE	Gria1	Glutamate receptor 1 OS=Mus musculus GN=Gria1 PE=1 SV=1	0	0	1	0	0	2	1	1	0	0	2	0	1	1	1	1
sp|P23819|GRIA2_MOUSE	Gria2	Glutamate receptor 2 OS=Mus musculus GN=Gria2 PE=1 SV=3	0	0	6	5	1	5	4	6	2	2	4	4	0	3	4	4
sp|Q9Z2W9|GRIA3_MOUSE	Gria3	Glutamate receptor 3 OS=Mus musculus GN=Gria3 PE=1 SV=2	0	0	0	0	0	0	1	0	0	0	0	2	0	0	3	1
sp|P35438|NMDZ1_MOUSE	Grin1	Glutamate receptor ionotropic, NMDA 1 OS=Mus musculus GN=Grin1 PE=1 SV=1	0	0	2	0	0	0	0	1	0	0	1	1	0	0	0	0
sp|Q8VD04|GRAP1_MOUSE	Gripap1	GRIP1-associated protein 1 OS=Mus musculus GN=Gripap1 PE=1 SV=1	0	0	0	0	0	1	0	0	0	0	0	0	0	0	0	0
sp|Q9QYS2|GRM3_MOUSE	Grm3	Metabotropic glutamate receptor 3 OS=Mus musculus GN=Grm3 PE=1 SV=1	0	2	1	1	0	0	0	2	0	0	0	1	0	0	2	0
sp|Q3UVX5|GRM5_MOUSE	Grm5	Metabotropic glutamate receptor 5 OS=Mus musculus GN=Grm5 PE=1 SV=2	0	0	0	1	0	0	0	0	0	0	0	0	0	0	0	0
sp|Q9Z0R0|HASP_MOUSE	Gsg2	Serine/threonine-protein kinase haspin OS=Mus musculus GN=Gsg2 PE=1 SV=3	0	0	0	0	0	1	0	0	0	0	0	0	0	0	0	0
sp|Q2NL51|GSK3A_MOUSE	Gsk3a	Glycogen synthase kinase-3 alpha OS=Mus musculus GN=Gsk3a PE=1 SV=2	0	3	6	3	0	1	3	4	0	0	1	1	0	0	3	3
sp|Q9WV60|GSK3B_MOUSE	Gsk3b	Glycogen synthase kinase-3 beta OS=Mus musculus GN=Gsk3b PE=1 SV=2	1	0	2	1	0	0	2	0	0	0	0	2	0	0	1	0
sp|P13020|GELS_MOUSE	Gsn	Gelsolin OS=Mus musculus GN=Gsn PE=1 SV=3	0	0	0	0	0	2	0	0	0	0	0	0	0	0	0	0
sp|Q149F3|ERF3B_MOUSE	Gspt2	Eukaryotic peptide chain release factor GTP-binding subunit ERF3B OS=Mus musculus GN=Gspt2 PE=1 SV=1	0	0	2	1	0	0	0	3	0	0	0	1	0	0	0	1
sp|P47791|GSHR_MOUSE	Gsr	Glutathione reductase, mitochondrial OS=Mus musculus GN=Gsr PE=1 SV=3	0	3	4	3	0	4	0	3	10	0	0	3	0	0	0	3
sp|P24472|GSTA4_MOUSE	Gsta4	Glutathione S-transferase A4 OS=Mus musculus GN=Gsta4 PE=1 SV=3	0	0	0	0	0	1	0	0	0	0	0	0	0	0	0	0
sp|P10649|GSTM1_MOUSE	Gstm1	Glutathione S-transferase Mu 1 OS=Mus musculus GN=Gstm1 PE=1 SV=2	1	28	3	3	0	13	2	6	3	2	2	2	0	5	3	8
sp|P48774|GSTM5_MOUSE	Gstm5	Glutathione S-transferase Mu 5 OS=Mus musculus GN=Gstm5 PE=1 SV=1	0	11	3	4	0	2	2	3	0	0	0	3	0	0	3	2
sp|P19157|GSTP1_MOUSE	Gstp1	Glutathione S-transferase P 1 OS=Mus musculus GN=Gstp1 PE=1 SV=2	2	0	1	2	0	13	3	2	0	1	2	1	1	6	1	2
sp|P46425|GSTP2_MOUSE	Gstp2	Glutathione S-transferase P 2 OS=Mus musculus GN=Gstp2 PE=1 SV=2	2	11	2	1	1	2	2	3	1	0	2	3	11	5	0	3
sp|Q9WVL0|MAAI_MOUSE	Gstz1	Maleylacetoacetate isomerase OS=Mus musculus GN=Gstz1 PE=1 SV=1	0	0	2	2	0	2	0	2	0	0	1	1	0	0	0	1
tr|Q3UH83|Q3UH83_MOUSE	Gucy1a2	Putative uncharacterized protein OS=Mus musculus GN=Gucy1a2 PE=2 SV=1	0	0	1	1	0	0	0	1	2	0	1	1	0	0	0	1
sp|O54865|GCYB1_MOUSE	Gucy1b3	Guanylate cyclase soluble subunit beta-1 OS=Mus musculus GN=Gucy1b3 PE=1 SV=1	0	0	1	2	0	0	0	2	1	0	0	0	0	0	0	0
sp|P10922|H10_MOUSE	H1f0	Histone H1.0 OS=Mus musculus GN=H1f0 PE=2 SV=4	1	0	0	0	1	0	0	0	0	1	0	0	0	0	0	0
sp|Q9QZQ8|H2AY_MOUSE	H2afy	Core histone macro-H2A.1 OS=Mus musculus GN=H2afy PE=1 SV=3	0	2	0	0	0	0	0	0	0	0	0	0	0	0	0	0
sp|P0C0S6|H2AZ_MOUSE	H2afz	Histone H2A.Z OS=Mus musculus GN=H2afz PE=1 SV=2	0	1	0	0	0	5	1	0	0	0	0	0	0	0	0	0
sp|Q8K2C9|HACD3_MOUSE	Hacd3	Very-long-chain (3R)-3-hydroxyacyl-CoA dehydratase 3 OS=Mus musculus GN=Hacd3 PE=1 SV=2	2	0	2	4	0	0	1	2	0	2	2	2	1	2	5	1
sp|Q61425|HCDH_MOUSE	Hadh	Hydroxyacyl-coenzyme A dehydrogenase, mitochondrial OS=Mus musculus GN=Hadh PE=1 SV=2	0	0	0	0	0	2	0	0	0	0	0	0	0	0	0	0
sp|Q8BMS1|ECHA_MOUSE	Hadha	Trifunctional enzyme subunit alpha, mitochondrial OS=Mus musculus GN=Hadha PE=1 SV=1	0	3	6	9	0	0	5	7	1	1	3	5	0	1	7	5
sp|Q99JY0|ECHB_MOUSE	Hadhb	Trifunctional enzyme subunit beta, mitochondrial OS=Mus musculus GN=Hadhb PE=1 SV=1	0	1	3	3	0	8	1	4	1	0	1	3	0	0	0	2
sp|Q99KB8|GLO2_MOUSE	Hagh	Hydroxyacylglutathione hydrolase, mitochondrial OS=Mus musculus GN=Hagh PE=1 SV=2	0	1	0	0	0	0	0	1	0	1	0	0	0	0	0	0
sp|Q9QUP5|HPLN1_MOUSE	Hapln1	Hyaluronan and proteoglycan link protein 1 OS=Mus musculus GN=Hapln1 PE=1 SV=1	0	0	0	3	0	4	2	0	1	1	0	2	0	0	1	3
sp|Q99KK9|SYHM_MOUSE	Hars2	Probable histidine--tRNA ligase, mitochondrial OS=Mus musculus GN=Hars2 PE=1 SV=1	0	0	0	0	0	1	0	0	0	0	0	0	0	0	0	0
sp|O35387|HAX1_MOUSE	Hax1	HCLS1-associated protein X-1 OS=Mus musculus GN=Hax1 PE=1 SV=1	0	0	0	0	0	1	0	0	0	0	0	0	0	0	0	0
sp|P01942|HBA_MOUSE	Hba	Hemoglobin subunit alpha OS=Mus musculus GN=Hba PE=1 SV=2	5	18	7	10	10	29	6	9	6	4	7	5	8	0	7	7
tr|Q91VB8|Q91VB8_MOUSE	Hba-a2	Alpha globin 1 OS=Mus musculus GN=Hba-a2 PE=1 SV=1	0	0	0	0	1	0	0	0	2	0	0	0	0	0	0	0
sp|P02088|HBB1_MOUSE	Hbb-b1	Hemoglobin subunit beta-1 OS=Mus musculus GN=Hbb-b1 PE=1 SV=2	19	32	10	9	10	23	10	9	9	11	10	15	29	26	8	10
sp|P02089|HBB2_MOUSE	Hbb-b2	Hemoglobin subunit beta-2 OS=Mus musculus GN=Hbb-b2 PE=1 SV=2	1	14	7	6	1	21	4	6	2	3	7	9	9	4	4	8
sp|P02104|HBE_MOUSE	Hbb-y	Hemoglobin subunit epsilon-Y2 OS=Mus musculus GN=Hbb-y PE=1 SV=2	0	0	0	0	0	0	1	0	0	0	0	0	4	2	0	0
tr|D4N6R6|D4N6R6_MUSMC	Hbbt1	Beta-globin OS=Mus musculus castaneus GN=Hbbt1 PE=3 SV=1	1	0	1	0	0	5	1	0	1	1	2	0	0	0	0	0
tr|G5E837|G5E837_MOUSE	Hcfc2	Host cell factor 2 OS=Mus musculus GN=Hcfc2 PE=1 SV=1	2	0	0	0	0	0	0	0	0	0	0	0	0	0	0	0
sp|O88704|HCN1_MOUSE	Hcn1	Potassium/sodium hyperpolarization-activated cyclic nucleotide-gated channel 1 OS=Mus musculus GN=Hcn1 PE=1 SV=1	0	0	1	0	0	0	1	0	0	0	0	0	0	1	0	0
sp|O88703|HCN2_MOUSE	Hcn2	Potassium/sodium hyperpolarization-activated cyclic nucleotide-gated channel 2 OS=Mus musculus GN=Hcn2 PE=1 SV=1	0	0	1	3	0	0	0	0	0	1	1	0	1	0	0	0
sp|O09106|HDAC1_MOUSE	Hdac1	Histone deacetylase 1 OS=Mus musculus GN=Hdac1 PE=1 SV=1	0	0	0	0	0	0	0	1	0	0	0	0	0	0	0	0
sp|Q91WA3|HDA11_MOUSE	Hdac11	Histone deacetylase 11 OS=Mus musculus GN=Hdac11 PE=1 SV=1	0	0	1	1	0	0	0	1	5	0	0	0	0	0	2	0
sp|P70288|HDAC2_MOUSE	Hdac2	Histone deacetylase 2 OS=Mus musculus GN=Hdac2 PE=1 SV=1	0	0	0	0	0	0	0	1	0	0	1	0	0	0	0	0
sp|Q9Z2V5|HDAC6_MOUSE	Hdac6	Histone deacetylase 6 OS=Mus musculus GN=Hdac6 PE=1 SV=3	0	0	0	0	0	0	0	1	0	0	0	0	0	0	0	0
sp|Q9D114|MESH1_MOUSE	Hddc3	Guanosine-3',5'-bis(diphosphate) 3'-pyrophosphohydrolase MESH1 OS=Mus musculus GN=Hddc3 PE=1 SV=1	0	0	0	0	0	1	0	0	0	0	0	0	0	0	0	0
sp|P51859|HDGF_MOUSE	Hdgf	Hepatoma-derived growth factor OS=Mus musculus GN=Hdgf PE=1 SV=2	0	0	0	0	0	1	0	0	0	0	0	0	0	0	0	0
sp|Q9CYW4|HDHD3_MOUSE	Hdhd3	Haloacid dehalogenase-like hydrolase domain-containing protein 3 OS=Mus musculus GN=Hdhd3 PE=1 SV=1	0	0	0	0	0	1	0	0	0	0	0	0	0	0	0	0
sp|Q9R257|HEBP1_MOUSE	Hebp1	Heme-binding protein 1 OS=Mus musculus GN=Hebp1 PE=1 SV=2	0	1	0	2	0	7	0	1	0	0	0	0	0	0	0	2
sp|Q8K4P8|HECW1_MOUSE	Hecw1	E3 ubiquitin-protein ligase HECW1 OS=Mus musculus GN=Hecw1 PE=1 SV=3	0	0	0	0	0	1	0	0	0	0	0	0	0	0	0	0
sp|Q640R3|HECAM_MOUSE	Hepacam	Hepatocyte cell adhesion molecule OS=Mus musculus GN=Hepacam PE=1 SV=2	2	4	4	4	0	4	3	6	4	1	5	4	0	1	7	2
sp|Q99L13|3HIDH_MOUSE	Hibadh	3-hydroxyisobutyrate dehydrogenase, mitochondrial OS=Mus musculus GN=Hibadh PE=1 SV=1	0	4	0	0	0	5	0	0	0	1	1	0	0	2	0	0
sp|P70349|HINT1_MOUSE	Hint1	Histidine triad nucleotide-binding protein 1 OS=Mus musculus GN=Hint1 PE=1 SV=3	5	3	1	1	1	1	1	1	1	0	1	1	2	2	1	1
sp|Q9D0S9|HINT2_MOUSE	Hint2	Histidine triad nucleotide-binding protein 2, mitochondrial OS=Mus musculus GN=Hint2 PE=1 SV=1	0	0	0	1	0	0	0	0	0	0	0	0	0	0	0	0
sp|Q9CPS6|HINT3_MOUSE	Hint3	Histidine triad nucleotide-binding protein 3 OS=Mus musculus GN=Hint3 PE=1 SV=1	0	1	0	0	0	1	0	0	0	0	0	0	0	0	0	0
sp|Q9JKY5|HIP1R_MOUSE	Hip1r	Huntingtin-interacting protein 1-related protein OS=Mus musculus GN=Hip1r PE=1 SV=2	0	0	0	0	0	1	0	0	0	0	0	0	0	0	0	0
sp|P43277|H13_MOUSE	Hist1h1d	Histone H1.3 OS=Mus musculus GN=Hist1h1d PE=1 SV=2	0	0	2	2	0	5	3	2	0	2	2	1	0	0	1	0
sp|P43274|H14_MOUSE	Hist1h1e	Histone H1.4 OS=Mus musculus GN=Hist1h1e PE=1 SV=2	0	0	0	1	0	1	1	1	0	0	1	1	0	2	0	0
sp|C0HKE3|H2A1D_MOUSE	Hist1h2ad	Histone H2A type 1-D OS=Mus musculus GN=Hist1h2ad PE=1 SV=1	3	16	1	2	2	13	5	4	2	3	1	1	3	1	1	2
sp|Q8CGP1|H2B1K_MOUSE	Hist1h2bk	Histone H2B type 1-K OS=Mus musculus GN=Hist1h2bk PE=1 SV=3	3	9	5	5	5	19	8	4	7	4	3	4	6	8	3	3
sp|P68433|H31_MOUSE	Hist1h3a	Histone H3.1 OS=Mus musculus GN=Hist1h3a PE=1 SV=2	4	1	0	2	0	8	5	4	0	0	0	4	4	2	3	2
sp|P62806|H4_MOUSE	Hist1h4a	Histone H4 OS=Mus musculus GN=Hist1h4a PE=1 SV=2	3	16	7	10	10	23	5	9	6	4	6	7	0	3	3	4
sp|P17710|HXK1_MOUSE	Hk1	Hexokinase-1 OS=Mus musculus GN=Hk1 PE=1 SV=3	0	4	1	2	0	3	0	3	0	1	0	1	0	3	0	1
sp|Q920N2|BPL1_MOUSE	Hlcs	Biotin--protein ligase OS=Mus musculus GN=Hlcs PE=1 SV=1	6	3	7	9	3	6	11	6	16	8	4	7	14	15	11	6
sp|P63158|HMGB1_MOUSE	Hmgb1	High mobility group protein B1 OS=Mus musculus GN=Hmgb1 PE=1 SV=2	0	3	0	0	0	0	0	0	0	0	0	0	0	0	0	0
sp|O54879|HMGB3_MOUSE	Hmgb3	High mobility group protein B3 OS=Mus musculus GN=Hmgb3 PE=1 SV=3	0	0	0	0	0	3	0	0	0	0	0	0	0	0	0	0
sp|Q91VF2|HNMT_MOUSE	Hnmt	Histamine N-methyltransferase OS=Mus musculus GN=Hnmt PE=1 SV=1	0	0	0	0	0	1	0	0	0	0	0	0	0	0	0	0
sp|Q9CX86|ROA0_MOUSE	Hnrnpa0	Heterogeneous nuclear ribonucleoprotein A0 OS=Mus musculus GN=Hnrnpa0 PE=1 SV=1	0	2	0	0	0	0	0	0	0	0	0	0	0	0	0	0
sp|P49312|ROA1_MOUSE	Hnrnpa1	Heterogeneous nuclear ribonucleoprotein A1 OS=Mus musculus GN=Hnrnpa1 PE=1 SV=2	0	1	0	0	1	4	0	0	1	1	0	0	0	0	0	1
sp|O88569|ROA2_MOUSE	Hnrnpa2b1	Heterogeneous nuclear ribonucleoproteins A2/B1 OS=Mus musculus GN=Hnrnpa2b1 PE=1 SV=2	0	0	0	0	0	6	2	0	0	0	0	0	0	0	0	0
sp|Q99020|ROAA_MOUSE	Hnrnpab	Heterogeneous nuclear ribonucleoprotein A/B OS=Mus musculus GN=Hnrnpab PE=1 SV=1	0	1	1	1	0	0	1	0	0	0	0	0	2	0	0	0
sp|Q9Z204|HNRPC_MOUSE	Hnrnpc	Heterogeneous nuclear ribonucleoproteins C1/C2 OS=Mus musculus GN=Hnrnpc PE=1 SV=1	0	0	0	0	0	2	0	2	2	0	0	0	0	0	0	0
sp|Q60668|HNRPD_MOUSE	Hnrnpd	Heterogeneous nuclear ribonucleoprotein D0 OS=Mus musculus GN=Hnrnpd PE=1 SV=2	0	1	0	0	0	2	1	0	0	0	0	0	3	1	0	0
sp|O35737|HNRH1_MOUSE	Hnrnph1	Heterogeneous nuclear ribonucleoprotein H OS=Mus musculus GN=Hnrnph1 PE=1 SV=3	0	0	0	0	0	1	0	0	0	0	0	0	0	0	0	0
sp|P61979|HNRPK_MOUSE	Hnrnpk	Heterogeneous nuclear ribonucleoprotein K OS=Mus musculus GN=Hnrnpk PE=1 SV=1	0	3	0	0	0	5	1	2	0	0	0	1	0	0	0	3
sp|Q8R081|HNRPL_MOUSE	Hnrnpl	Heterogeneous nuclear ribonucleoprotein L OS=Mus musculus GN=Hnrnpl PE=1 SV=2	0	2	3	0	0	5	2	7	0	0	1	1	0	0	2	3
sp|Q921F4|HNRLL_MOUSE	Hnrnpll	Heterogeneous nuclear ribonucleoprotein L-like OS=Mus musculus GN=Hnrnpll PE=1 SV=3	0	0	1	3	0	5	0	2	0	0	0	3	2	0	2	1
sp|Q9D0E1|HNRPM_MOUSE	Hnrnpm	Heterogeneous nuclear ribonucleoprotein M OS=Mus musculus GN=Hnrnpm PE=1 SV=3	0	4	0	0	0	2	0	0	0	0	0	0	0	0	0	0
sp|Q8VEK3|HNRPU_MOUSE	Hnrnpu	Heterogeneous nuclear ribonucleoprotein U OS=Mus musculus GN=Hnrnpu PE=1 SV=1	1	3	3	7	0	2	3	6	1	1	5	1	13	2	2	5
sp|Q00PI9|HNRL2_MOUSE	Hnrnpul2	Heterogeneous nuclear ribonucleoprotein U-like protein 2 OS=Mus musculus GN=Hnrnpul2 PE=1 SV=2	0	0	2	0	0	0	0	2	0	0	1	0	0	0	1	1
sp|Q9Z2Y3|HOME1_MOUSE	Homer1	Homer protein homolog 1 OS=Mus musculus GN=Homer1 PE=1 SV=2	0	2	0	0	0	1	0	0	0	0	0	0	0	0	0	0
sp|Q61646|HPT_MOUSE	Hp	Haptoglobin OS=Mus musculus GN=Hp PE=1 SV=1	0	0	3	0	0	5	0	0	0	0	0	0	0	0	0	0
sp|Q3TEA8|HP1B3_MOUSE	Hp1bp3	Heterochromatin protein 1-binding protein 3 OS=Mus musculus GN=Hp1bp3 PE=1 SV=1	0	0	0	0	0	1	0	0	0	0	0	0	0	0	0	0
sp|P84075|HPCA_MOUSE	Hpca	Neuron-specific calcium-binding protein hippocalcin OS=Mus musculus GN=Hpca PE=1 SV=2	0	5	0	1	0	2	0	0	1	0	0	1	0	0	0	2
sp|P62748|HPCL1_MOUSE	Hpcal1	Hippocalcin-like protein 1 OS=Mus musculus GN=Hpcal1 PE=1 SV=2	1	5	2	2	0	11	5	2	4	0	2	2	1	0	1	2
sp|Q8BGZ1|HPCL4_MOUSE	Hpcal4	Hippocalcin-like protein 4 OS=Mus musculus GN=Hpcal4 PE=1 SV=3	0	4	0	1	1	6	0	1	2	1	2	0	2	2	1	2
sp|O35453|HEPS_MOUSE	Hpn	Serine protease hepsin OS=Mus musculus GN=Hpn PE=1 SV=3	0	0	0	0	0	0	0	0	1	0	0	0	0	0	0	0
sp|P00493|HPRT_MOUSE	Hprt1	Hypoxanthine-guanine phosphoribosyltransferase OS=Mus musculus GN=Hprt1 PE=1 SV=3	0	3	0	0	2	3	1	1	0	0	0	0	0	0	0	0
sp|Q61411|RASH_MOUSE	Hras	GTPase HRas OS=Mus musculus GN=Hras PE=1 SV=2	2	5	2	1	0	2	2	3	0	0	1	2	5	2	1	4
sp|Q9CQZ1|HSBP1_MOUSE	Hsbp1	Heat shock factor-binding protein 1 OS=Mus musculus GN=Hsbp1 PE=1 SV=1	0	0	0	0	0	2	0	0	0	0	0	0	0	0	0	0
sp|O08756|HCD2_MOUSE	Hsd17b10	3-hydroxyacyl-CoA dehydrogenase type-2 OS=Mus musculus GN=Hsd17b10 PE=1 SV=4	0	3	6	4	0	4	1	6	1	2	7	5	0	0	6	7
sp|Q9EQ06|DHB11_MOUSE	Hsd17b11	Estradiol 17-beta-dehydrogenase 11 OS=Mus musculus GN=Hsd17b11 PE=1 SV=1	0	1	1	0	0	0	0	1	1	0	1	1	1	0	0	0
sp|O70503|DHB12_MOUSE	Hsd17b12	Very-long-chain 3-oxoacyl-CoA reductase OS=Mus musculus GN=Hsd17b12 PE=1 SV=1	0	0	0	2	0	0	0	0	0	0	0	0	0	0	0	0
sp|P51660|DHB4_MOUSE	Hsd17b4	Peroxisomal multifunctional enzyme type 2 OS=Mus musculus GN=Hsd17b4 PE=1 SV=3	0	0	1	0	0	1	0	1	0	0	0	0	0	0	0	0
sp|P50171|DHB8_MOUSE	Hsd17b8	Estradiol 17-beta-dehydrogenase 8 OS=Mus musculus GN=Hsd17b8 PE=1 SV=2	0	1	0	0	0	1	0	1	0	0	0	0	0	0	0	1
sp|Q8BTX9|HSDL1_MOUSE	Hsdl1	Inactive hydroxysteroid dehydrogenase-like protein 1 OS=Mus musculus GN=Hsdl1 PE=1 SV=1	0	0	0	0	0	0	2	0	3	0	0	0	1	0	0	0
sp|P07901|HS90A_MOUSE	Hsp90aa1	Heat shock protein HSP 90-alpha OS=Mus musculus GN=Hsp90aa1 PE=1 SV=4	4	10	10	9	6	33	7	16	4	4	9	11	4	8	11	17
sp|P11499|HS90B_MOUSE	Hsp90ab1	Heat shock protein HSP 90-beta OS=Mus musculus GN=Hsp90ab1 PE=1 SV=3	10	32	33	35	10	38	21	33	14	17	16	20	18	14	22	32
sp|P08113|ENPL_MOUSE	Hsp90b1	Endoplasmin OS=Mus musculus GN=Hsp90b1 PE=1 SV=2	0	10	1	3	1	14	1	1	2	0	1	2	2	2	1	3
sp|Q8K0U4|HS12A_MOUSE	Hspa12a	Heat shock 70 kDa protein 12A OS=Mus musculus GN=Hspa12a PE=1 SV=1	7	10	10	17	3	14	12	12	12	2	9	11	8	2	8	12
sp|P17879|HS71B_MOUSE	Hspa1b	Heat shock 70 kDa protein 1B OS=Mus musculus GN=Hspa1b PE=1 SV=3	3	3	6	5	6	16	8	4	4	3	4	1	6	3	3	3
sp|P16627|HS71L_MOUSE	Hspa1l	Heat shock 70 kDa protein 1-like OS=Mus musculus GN=Hspa1l PE=1 SV=4	0	1	0	0	0	0	0	0	0	0	0	0	0	0	0	0
sp|P17156|HSP72_MOUSE	Hspa2	Heat shock-related 70 kDa protein 2 OS=Mus musculus GN=Hspa2 PE=1 SV=2	3	29	3	6	0	23	6	4	3	9	5	4	5	7	7	7
sp|Q61316|HSP74_MOUSE	Hspa4	Heat shock 70 kDa protein 4 OS=Mus musculus GN=Hspa4 PE=1 SV=1	21	24	25	23	7	22	13	29	15	14	19	16	20	21	31	25
sp|P48722|HS74L_MOUSE	Hspa4l	Heat shock 70 kDa protein 4L OS=Mus musculus GN=Hspa4l PE=1 SV=2	2	8	14	9	3	15	5	12	4	5	11	10	9	2	12	13
sp|P20029|GRP78_MOUSE	Hspa5	78 kDa glucose-regulated protein OS=Mus musculus GN=Hspa5 PE=1 SV=3	11	36	8	8	14	37	13	5	6	10	9	7	6	9	9	11
sp|P63017|HSP7C_MOUSE	Hspa8	Heat shock cognate 71 kDa protein OS=Mus musculus GN=Hspa8 PE=1 SV=1	39	42	28	32	31	83	32	27	15	31	29	26	35	20	27	36
sp|P38647|GRP75_MOUSE	Hspa9	Stress-70 protein, mitochondrial OS=Mus musculus GN=Hspa9 PE=1 SV=3	1	20	5	9	1	18	5	2	4	2	3	7	5	5	2	6
sp|P63038|CH60_MOUSE	Hspd1	60 kDa heat shock protein, mitochondrial OS=Mus musculus GN=Hspd1 PE=1 SV=1	6	41	10	9	5	42	9	9	6	7	6	10	0	6	6	9
sp|Q64433|CH10_MOUSE	Hspe1	10 kDa heat shock protein, mitochondrial OS=Mus musculus GN=Hspe1 PE=1 SV=2	0	0	0	1	0	19	1	0	0	0	0	0	0	0	0	0
sp|Q61699|HS105_MOUSE	Hsph1	Heat shock protein 105 kDa OS=Mus musculus GN=Hsph1 PE=1 SV=2	5	18	7	9	2	6	5	10	3	3	6	4	4	4	10	7
tr|G8H732|G8H732_MOUSE	Htr4	5-hydroxytryptamine receptor variant T1 (Fragment) OS=Mus musculus GN=Htr4 PE=2 SV=1	0	1	0	0	0	0	0	0	0	0	0	0	0	0	0	0
sp|P42859|HD_MOUSE	Htt	Huntingtin OS=Mus musculus GN=Htt PE=1 SV=2	0	0	1	0	0	0	0	0	0	0	1	0	0	0	1	0
sp|Q7TMY8|HUWE1_MOUSE	Huwe1	E3 ubiquitin-protein ligase HUWE1 OS=Mus musculus GN=Huwe1 PE=1 SV=5	0	0	1	2	0	3	0	0	4	0	0	1	0	0	0	0
sp|Q9JKR6|HYOU1_MOUSE	Hyou1	Hypoxia up-regulated protein 1 OS=Mus musculus GN=Hyou1 PE=1 SV=1	0	3	0	0	0	4	0	0	0	0	0	0	0	0	0	0
sp|Q8BIJ6|SYIM_MOUSE	Iars2	Isoleucine--tRNA ligase, mitochondrial OS=Mus musculus GN=Iars2 PE=1 SV=1	0	0	1	2	0	0	2	5	0	0	1	2	0	0	2	2
sp|Q60625|ICAM5_MOUSE	Icam5	Intercellular adhesion molecule 5 OS=Mus musculus GN=Icam5 PE=1 SV=2	0	0	0	0	0	1	0	0	0	0	0	0	0	0	0	0
sp|O88844|IDHC_MOUSE	Idh1	Isocitrate dehydrogenase [NADP] cytoplasmic OS=Mus musculus GN=Idh1 PE=1 SV=2	0	2	0	0	0	2	0	0	0	0	0	0	0	0	0	0
sp|P54071|IDHP_MOUSE	Idh2	Isocitrate dehydrogenase [NADP], mitochondrial OS=Mus musculus GN=Idh2 PE=1 SV=3	0	0	0	1	0	1	0	0	1	0	0	1	0	0	0	3
sp|Q9D6R2|IDH3A_MOUSE	Idh3a	Isocitrate dehydrogenase [NAD] subunit alpha, mitochondrial OS=Mus musculus GN=Idh3a PE=1 SV=1	0	8	2	6	1	18	5	2	4	4	3	4	2	2	4	9
tr|Q91VA7|Q91VA7_MOUSE	Idh3b	Isocitrate dehydrogenase [NAD] subunit, mitochondrial OS=Mus musculus GN=Idh3b PE=1 SV=1	0	8	8	6	0	13	4	8	3	1	6	6	0	0	4	6
sp|P70404|IDHG1_MOUSE	Idh3g	Isocitrate dehydrogenase [NAD] subunit gamma 1, mitochondrial OS=Mus musculus GN=Idh3g PE=1 SV=1	2	14	7	5	0	7	4	5	3	0	3	7	5	6	4	5
sp|Q8BV66|IFI44_MOUSE	Ifi44	Interferon-induced protein 44 OS=Mus musculus GN=Ifi44 PE=2 SV=1	0	0	0	0	0	0	0	0	0	0	0	0	1	0	0	0
sp|Q07113|MPRI_MOUSE	Igf2r	Cation-independent mannose-6-phosphate receptor OS=Mus musculus GN=Igf2r PE=1 SV=1	0	0	0	0	0	0	0	0	0	1	0	0	0	0	0	0
sp|Q3KNY0|IGFN1_MOUSE	Igfn1	Immunoglobulin-like and fibronectin type III domain-containing protein 1 OS=Mus musculus GN=Igfn1 PE=1 SV=3	0	0	0	0	0	0	0	0	0	0	0	0	1	0	0	0
tr|A0A140T8N8|A0A140T8N8_MOUSE	Igkv9-123	Immunoglobulin kappa variable 9-123 (Fragment) OS=Mus musculus GN=Igkv9-123 PE=4 SV=2	0	0	0	0	0	1	0	0	0	0	0	0	0	0	0	0
sp|Q8R366|IGSF8_MOUSE	Igsf8	Immunoglobulin superfamily member 8 OS=Mus musculus GN=Igsf8 PE=1 SV=2	5	13	7	9	1	8	9	9	8	10	10	7	8	11	7	8
sp|Q7TT37|ELP1_MOUSE	Ikbkap	Elongator complex protein 1 OS=Mus musculus GN=Ikbkap PE=1 SV=2	0	0	0	1	0	0	0	0	0	0	0	0	0	0	0	0
sp|Q9CXY6|ILF2_MOUSE	Ilf2	Interleukin enhancer-binding factor 2 OS=Mus musculus GN=Ilf2 PE=1 SV=1	0	0	0	0	0	3	0	0	0	0	0	0	0	0	0	0
sp|Q8CAQ8|MIC60_MOUSE	Immt	MICOS complex subunit Mic60 OS=Mus musculus GN=Immt PE=1 SV=1	0	10	11	5	2	17	5	15	5	2	6	8	3	0	9	9
sp|O55023|IMPA1_MOUSE	Impa1	Inositol monophosphatase 1 OS=Mus musculus GN=Impa1 PE=1 SV=1	1	13	6	6	3	4	3	6	8	0	5	4	4	3	6	6
sp|O55091|IMPCT_MOUSE	Impact	Protein IMPACT OS=Mus musculus GN=Impact PE=1 SV=2	0	0	0	2	0	0	0	2	1	1	0	0	0	0	3	3
sp|P46660|AINX_MOUSE	Ina	Alpha-internexin OS=Mus musculus GN=Ina PE=1 SV=3	3	67	10	10	5	35	14	7	8	4	8	13	11	11	8	11
sp|P49442|INPP_MOUSE	Inpp1	Inositol polyphosphate 1-phosphatase OS=Mus musculus GN=Inpp1 PE=1 SV=2	0	1	2	1	0	1	0	1	0	0	0	0	0	0	3	2
sp|P59644|PI5PA_MOUSE	Inpp5j	Phosphatidylinositol 4,5-bisphosphate 5-phosphatase A OS=Mus musculus GN=Inpp5j PE=1 SV=2	0	0	1	0	0	0	0	0	0	0	0	0	0	0	0	0
sp|Q8R0S2|IQEC1_MOUSE	Iqsec1	IQ motif and SEC7 domain-containing protein 1 OS=Mus musculus GN=Iqsec1 PE=1 SV=2	0	2	3	5	0	5	1	2	3	4	1	1	0	0	3	1
sp|Q5DU25|IQEC2_MOUSE	Iqsec2	IQ motif and SEC7 domain-containing protein 2 OS=Mus musculus GN=Iqsec2 PE=1 SV=3	0	0	1	1	0	0	0	1	0	0	0	1	0	0	1	1
sp|Q9D924|ISCA1_MOUSE	Isca1	Iron-sulfur cluster assembly 1 homolog, mitochondrial OS=Mus musculus GN=Isca1 PE=2 SV=1	0	1	0	0	0	1	0	0	0	0	0	0	0	0	0	0
sp|Q9D7P6|ISCU_MOUSE	Iscu	Iron-sulfur cluster assembly enzyme ISCU, mitochondrial OS=Mus musculus GN=Iscu PE=1 SV=1	0	0	0	0	0	1	0	0	0	0	0	0	0	0	0	0
sp|Q91V64|ISOC1_MOUSE	Isoc1	Isochorismatase domain-containing protein 1 OS=Mus musculus GN=Isoc1 PE=1 SV=1	0	0	2	3	0	0	0	2	1	3	1	2	0	0	1	1
sp|P85094|ISC2A_MOUSE	Isoc2a	Isochorismatase domain-containing protein 2A OS=Mus musculus GN=Isoc2a PE=1 SV=1	0	0	0	0	0	0	0	0	0	0	0	0	0	0	0	1
sp|Q8C863|ITCH_MOUSE	Itch	E3 ubiquitin-protein ligase Itchy OS=Mus musculus GN=Itch PE=1 SV=2	0	0	0	0	0	2	0	0	0	0	0	0	0	0	0	0
sp|O35671|ITBP1_MOUSE	Itgb1bp1	Integrin beta-1-binding protein 1 OS=Mus musculus GN=Itgb1bp1 PE=1 SV=1	0	0	0	0	0	1	0	0	0	0	0	0	0	0	0	0
sp|Q61704|ITIH3_MOUSE	Itih3	Inter-alpha-trypsin inhibitor heavy chain H3 OS=Mus musculus GN=Itih3 PE=1 SV=3	0	0	0	0	0	5	0	0	0	0	0	0	0	0	0	0
sp|Q9D892|ITPA_MOUSE	Itpa	Inosine triphosphate pyrophosphatase OS=Mus musculus GN=Itpa PE=1 SV=2	0	0	1	2	0	6	0	0	0	0	1	3	1	0	1	0
sp|Q8R071|IP3KA_MOUSE	Itpka	Inositol-trisphosphate 3-kinase A OS=Mus musculus GN=Itpka PE=1 SV=1	0	3	0	0	0	2	0	0	0	0	0	0	0	2	0	0
sp|P11881|ITPR1_MOUSE	Itpr1	Inositol 1,4,5-trisphosphate receptor type 1 OS=Mus musculus GN=Itpr1 PE=1 SV=2	0	0	4	4	0	3	1	0	0	0	0	2	0	0	0	0
sp|Q9Z0R4|ITSN1_MOUSE	Itsn1	Intersectin-1 OS=Mus musculus GN=Itsn1 PE=1 SV=2	0	0	2	0	0	0	0	0	0	0	0	0	0	0	0	0
sp|Q9JHI5|IVD_MOUSE	Ivd	Isovaleryl-CoA dehydrogenase, mitochondrial OS=Mus musculus GN=Ivd PE=1 SV=1	0	0	1	0	0	0	1	0	0	0	0	0	0	0	0	0
sp|Q5XKN4|JAGN1_MOUSE	Jagn1	Protein jagunal homolog 1 OS=Mus musculus GN=Jagn1 PE=1 SV=2	0	0	0	0	0	2	0	0	1	0	0	0	0	0	0	0
sp|P97825|JUPI1_MOUSE	JPT1	Jupiter microtubule associated homolog 1 OS=Mus musculus GN=JPT1 PE=1 SV=3	0	0	0	0	0	3	0	0	0	0	0	0	0	0	0	0
sp|Q99MN1|SYK_MOUSE	Kars	Lysine--tRNA ligase OS=Mus musculus GN=Kars PE=1 SV=1	0	1	0	0	0	3	0	0	0	0	0	0	0	0	0	0
sp|Q8BG40|KTNB1_MOUSE	Katnb1	Katanin p80 WD40 repeat-containing subunit B1 OS=Mus musculus GN=Katnb1 PE=1 SV=1	0	0	0	0	0	1	0	0	0	0	0	0	0	0	0	0
sp|Q8BNW9|KBTBB_MOUSE	Kbtbd11	Kelch repeat and BTB domain-containing protein 11 OS=Mus musculus GN=Kbtbd11 PE=1 SV=3	0	0	3	4	0	4	1	3	3	2	2	1	0	0	3	3
sp|P16388|KCNA1_MOUSE	Kcna1	Potassium voltage-gated channel subfamily A member 1 OS=Mus musculus GN=Kcna1 PE=1 SV=1	0	0	0	1	0	0	0	0	0	0	0	0	0	0	0	0
sp|B2RQA1|KCA10_MOUSE	Kcna10	Potassium voltage-gated channel subfamily A member 10 OS=Mus musculus GN=Kcna10 PE=2 SV=1	0	0	1	1	0	0	0	1	0	0	1	1	0	0	1	1
sp|P63141|KCNA2_MOUSE	Kcna2	Potassium voltage-gated channel subfamily A member 2 OS=Mus musculus GN=Kcna2 PE=1 SV=1	0	0	2	0	0	0	0	0	0	0	1	1	0	0	0	0
sp|P62482|KCAB2_MOUSE	Kcnab2	Voltage-gated potassium channel subunit beta-2 OS=Mus musculus GN=Kcnab2 PE=1 SV=1	0	0	2	3	0	4	0	1	0	0	1	1	0	0	1	1
sp|Q9JM63|KCJ10_MOUSE	Kcnj10	ATP-sensitive inward rectifier potassium channel 10 OS=Mus musculus GN=Kcnj10 PE=1 SV=1	0	0	0	0	0	0	0	0	5	0	0	0	0	0	1	0
tr|Q8BZB0|Q8BZB0_MOUSE	Kcnk10	Putative uncharacterized protein (Fragment) OS=Mus musculus GN=Kcnk10 PE=2 SV=1	0	0	0	0	0	0	0	0	0	0	0	0	1	0	0	0
sp|Q08460|KCMA1_MOUSE	Kcnma1	Calcium-activated potassium channel subunit alpha-1 OS=Mus musculus GN=Kcnma1 PE=1 SV=2	0	0	1	0	0	1	0	0	1	2	2	0	0	0	1	1
sp|Q9Z351|KCNQ2_MOUSE	Kcnq2	Potassium voltage-gated channel subfamily KQT member 2 OS=Mus musculus GN=Kcnq2 PE=1 SV=1	0	0	0	0	0	0	0	0	0	0	1	0	1	0	0	0
sp|Q6WVG3|KCD12_MOUSE	Kctd12	BTB/POZ domain-containing protein KCTD12 OS=Mus musculus GN=Kctd12 PE=1 SV=1	1	2	0	0	0	3	1	4	0	0	2	2	2	0	2	3
sp|Q5DTY9|KCD16_MOUSE	Kctd16	BTB/POZ domain-containing protein KCTD16 OS=Mus musculus GN=Kctd16 PE=1 SV=2	0	0	1	0	0	0	0	1	0	0	0	0	0	0	0	1
sp|Q6GV12|KDSR_MOUSE	Kdsr	3-ketodihydrosphingosine reductase OS=Mus musculus GN=Kdsr PE=1 SV=1	0	0	0	1	0	0	0	0	0	0	0	0	0	0	0	0
sp|Q3U0V1|FUBP2_MOUSE	Khsrp	Far upstream element-binding protein 2 OS=Mus musculus GN=Khsrp PE=1 SV=2	0	0	0	0	0	2	0	0	0	0	0	0	0	0	0	0
sp|Q8R0A7|K0513_MOUSE	Kiaa0513	Uncharacterized protein KIAA0513 OS=Mus musculus GN=Kiaa0513 PE=1 SV=1	0	0	0	1	0	0	0	0	0	0	0	0	0	0	0	0
sp|P33173|KIF1A_MOUSE	Kif1a	Kinesin-like protein KIF1A OS=Mus musculus GN=Kif1a PE=1 SV=2	0	2	4	3	0	0	2	4	0	0	5	4	0	1	3	2
sp|Q6ZPU9|KBP_MOUSE	Kif1bp	KIF1-binding protein OS=Mus musculus GN=Kif1bp PE=1 SV=2	0	0	0	0	0	0	0	0	0	0	1	0	0	0	0	1
sp|Q9QXL2|KI21A_MOUSE	Kif21a	Kinesin-like protein KIF21A OS=Mus musculus GN=Kif21a PE=1 SV=2	0	0	6	4	1	3	2	5	2	3	3	2	1	0	7	4
sp|Q9QXL1|KI21B_MOUSE	Kif21b	Kinesin-like protein KIF21B OS=Mus musculus GN=Kif21b PE=1 SV=2	0	0	1	0	0	0	1	2	0	0	1	1	0	0	1	0
sp|P28740|KIF2A_MOUSE	Kif2a	Kinesin-like protein KIF2A OS=Mus musculus GN=Kif2a PE=1 SV=2	0	0	3	3	0	0	0	4	0	1	2	3	0	0	2	3
sp|P28741|KIF3A_MOUSE	Kif3a	Kinesin-like protein KIF3A OS=Mus musculus GN=Kif3a PE=1 SV=2	0	0	0	0	0	1	0	0	0	0	0	0	0	0	0	0
sp|Q61771|KIF3B_MOUSE	Kif3b	Kinesin-like protein KIF3B OS=Mus musculus GN=Kif3b PE=1 SV=1	0	2	0	0	0	1	0	0	0	0	0	0	0	0	0	0
sp|Q61768|KINH_MOUSE	Kif5b	Kinesin-1 heavy chain OS=Mus musculus GN=Kif5b PE=1 SV=3	0	0	0	0	0	4	0	0	1	0	0	0	0	0	0	0
sp|P28738|KIF5C_MOUSE	Kif5c	Kinesin heavy chain isoform 5C OS=Mus musculus GN=Kif5c PE=1 SV=3	0	3	1	1	0	2	1	1	0	3	2	1	0	0	1	1
sp|O88447|KLC1_MOUSE	Klc1	Kinesin light chain 1 OS=Mus musculus GN=Klc1 PE=1 SV=3	0	1	0	0	0	0	0	0	0	0	0	0	0	0	0	0
sp|Q9JI74|KLHL1_MOUSE	Klhl1	Kelch-like protein 1 OS=Mus musculus GN=Klhl1 PE=2 SV=2	0	0	0	0	0	3	0	0	0	0	0	0	0	0	0	0
sp|P70168|IMB1_MOUSE	Kpnb1	Importin subunit beta-1 OS=Mus musculus GN=Kpnb1 PE=1 SV=2	0	0	0	0	0	0	0	0	0	0	0	1	0	0	0	0
sp|P32883|RASK_MOUSE	Kras	GTPase KRas OS=Mus musculus GN=Kras PE=1 SV=1	0	1	1	0	0	0	0	0	0	0	0	0	0	0	0	0
sp|A1L317|K1C24_MOUSE	Krt24	Keratin, type I cytoskeletal 24 OS=Mus musculus GN=Krt24 PE=2 SV=2	0	0	0	0	7	0	0	0	0	0	0	0	0	0	0	0
sp|Q8K0Y2|KT33A_MOUSE	Krt33a	Keratin, type I cuticular Ha3-I OS=Mus musculus GN=Krt33a PE=1 SV=1	0	0	0	0	0	0	0	0	0	0	0	0	0	1	0	0
sp|Q61595|KTN1_MOUSE	Ktn1	Kinectin OS=Mus musculus GN=Ktn1 PE=1 SV=1	0	0	0	0	0	1	0	0	0	0	0	0	0	0	0	0
tr|Q6PGJ3|Q6PGJ3_MOUSE	L1cam	L1 cell adhesion molecule OS=Mus musculus GN=L1cam PE=1 SV=1	0	6	2	0	0	6	1	1	1	0	1	2	0	0	0	2
sp|Q91YP0|L2HDH_MOUSE	L2hgdh	L-2-hydroxyglutarate dehydrogenase, mitochondrial OS=Mus musculus GN=L2hgdh PE=1 SV=1	0	0	0	0	0	0	0	2	0	0	0	0	1	0	0	0
sp|P11438|LAMP1_MOUSE	Lamp1	Lysosome-associated membrane glycoprotein 1 OS=Mus musculus GN=Lamp1 PE=1 SV=2	0	1	0	0	0	0	0	0	0	0	0	0	0	0	0	0
sp|O89112|LANC1_MOUSE	Lancl1	LanC-like protein 1 OS=Mus musculus GN=Lancl1 PE=1 SV=1	1	0	3	3	1	3	2	2	2	0	3	3	3	0	5	3
sp|Q9JJK2|LANC2_MOUSE	Lancl2	LanC-like protein 2 OS=Mus musculus GN=Lancl2 PE=1 SV=1	0	0	0	1	0	3	0	0	0	0	0	0	1	0	0	1
sp|Q9CPY7|AMPL_MOUSE	Lap3	Cytosol aminopeptidase OS=Mus musculus GN=Lap3 PE=1 SV=3	0	4	0	0	1	0	0	0	0	0	1	0	0	0	0	0
sp|Q6ZQ58|LARP1_MOUSE	Larp1	La-related protein 1 OS=Mus musculus GN=Larp1 PE=1 SV=3	0	0	1	0	0	0	2	2	0	0	2	2	0	0	0	0
sp|Q61792|LASP1_MOUSE	Lasp1	LIM and SH3 domain protein 1 OS=Mus musculus GN=Lasp1 PE=1 SV=1	1	4	3	5	0	7	3	2	0	2	1	3	3	1	5	2
sp|P06151|LDHA_MOUSE	Ldha	L-lactate dehydrogenase A chain OS=Mus musculus GN=Ldha PE=1 SV=3	9	19	19	12	9	10	10	17	5	9	10	9	15	9	11	11
sp|P16125|LDHB_MOUSE	Ldhb	L-lactate dehydrogenase B chain OS=Mus musculus GN=Ldhb PE=1 SV=2	11	23	20	21	8	37	22	18	13	11	21	18	36	12	14	17
sp|P00342|LDHC_MOUSE	Ldhc	L-lactate dehydrogenase C chain OS=Mus musculus GN=Ldhc PE=1 SV=2	1	2	1	1	2	0	3	1	1	1	1	1	1	1	1	1
sp|Q9Z2I0|LETM1_MOUSE	Letm1	LETM1 and EF-hand domain-containing protein 1, mitochondrial OS=Mus musculus GN=Letm1 PE=1 SV=1	0	1	0	0	0	3	0	1	0	0	0	0	0	0	0	1
sp|Q8VED9|LEGL_MOUSE	Lgalsl	Galectin-related protein OS=Mus musculus GN=Lgalsl PE=1 SV=1	0	0	0	2	0	5	1	1	0	0	0	0	1	0	0	0
sp|Q9JIA1|LGI1_MOUSE	Lgi1	Leucine-rich glioma-inactivated protein 1 OS=Mus musculus GN=Lgi1 PE=1 SV=1	4	15	9	8	5	0	5	6	2	3	7	5	11	2	6	6
sp|Q8K406|LGI3_MOUSE	Lgi3	Leucine-rich repeat LGI family member 3 OS=Mus musculus GN=Lgi3 PE=1 SV=1	1	0	2	0	0	0	0	0	1	0	1	1	0	0	1	0
sp|O88951|LIN7B_MOUSE	Lin7b	Protein lin-7 homolog B OS=Mus musculus GN=Lin7b PE=1 SV=2	0	0	0	0	0	1	0	0	0	1	0	0	0	0	0	0
sp|Q9D1T0|LIGO1_MOUSE	Lingo1	Leucine-rich repeat and immunoglobulin-like domain-containing nogo receptor-interacting protein 1 OS=Mus musculus GN=Lingo1 PE=1 SV=1	0	6	0	0	0	1	0	0	0	0	0	0	0	0	0	0
sp|Q80Y17|L2GL1_MOUSE	Llgl1	Lethal(2) giant larvae protein homolog 1 OS=Mus musculus GN=Llgl1 PE=1 SV=1	0	1	3	1	0	0	0	1	0	0	0	3	0	0	2	1
sp|Q8C561|LMBD2_MOUSE	Lmbrd2	LMBR1 domain-containing protein 2 OS=Mus musculus GN=Lmbrd2 PE=1 SV=1	0	0	0	0	0	2	0	0	0	0	0	0	0	0	0	0
sp|P48678|LMNA_MOUSE	Lmna	Prelamin-A/C OS=Mus musculus GN=Lmna PE=1 SV=2	0	5	0	0	0	7	0	0	0	0	0	0	0	0	0	0
sp|P14733|LMNB1_MOUSE	Lmnb1	Lamin-B1 OS=Mus musculus GN=Lmnb1 PE=1 SV=3	0	1	0	0	0	3	0	0	0	0	0	0	1	0	0	0
sp|P21619|LMNB2_MOUSE	Lmnb2	Lamin-B2 OS=Mus musculus GN=Lmnb2 PE=1 SV=2	0	7	0	0	0	4	0	0	0	0	0	0	0	0	0	0
sp|Q7TQ95|LNP_MOUSE	Lnp	Protein lunapark OS=Mus musculus GN=Lnp PE=1 SV=1	0	0	0	0	0	1	0	0	0	0	0	0	0	0	0	0
sp|Q8C129|LCAP_MOUSE	Lnpep	Leucyl-cystinyl aminopeptidase OS=Mus musculus GN=Lnpep PE=1 SV=1	0	0	0	0	0	0	0	0	0	0	0	0	0	0	0	1
sp|Q8CGK3|LONM_MOUSE	Lonp1	Lon protease homolog, mitochondrial OS=Mus musculus GN=Lonp1 PE=1 SV=2	0	6	0	1	0	0	0	0	0	0	1	0	0	0	1	1
sp|Q9D5S7|LRGUK_MOUSE	Lrguk	Leucine-rich repeat and guanylate kinase domain-containing protein OS=Mus musculus GN=Lrguk PE=1 SV=1	0	0	0	0	0	0	0	0	4	0	0	0	0	0	0	0
sp|Q91ZX7|LRP1_MOUSE	Lrp1	Prolow-density lipoprotein receptor-related protein 1 OS=Mus musculus GN=Lrp1 PE=1 SV=1	0	0	0	0	0	0	0	1	0	0	0	0	0	0	0	1
sp|Q9D1G5|LRC57_MOUSE	Lrrc57	Leucine-rich repeat-containing protein 57 OS=Mus musculus GN=Lrrc57 PE=1 SV=1	0	1	0	0	0	0	0	0	0	0	0	0	0	0	0	0
sp|Q8BLK3|LSAMP_MOUSE	Lsamp	Limbic system-associated membrane protein OS=Mus musculus GN=Lsamp PE=1 SV=1	0	1	2	0	0	0	1	1	0	0	2	1	0	0	1	0
sp|O35900|LSM2_MOUSE	Lsm2	U6 snRNA-associated Sm-like protein LSm2 OS=Mus musculus GN=Lsm2 PE=1 SV=1	0	1	0	0	0	1	0	0	0	0	0	0	0	0	0	1
sp|P24527|LKHA4_MOUSE	Lta4h	Leukotriene A-4 hydrolase OS=Mus musculus GN=Lta4h PE=1 SV=4	2	3	4	4	1	5	2	6	0	0	1	3	0	1	3	5
sp|P70202|LXN_MOUSE	Lxn	Latexin OS=Mus musculus GN=Lxn PE=1 SV=2	0	1	1	0	0	1	0	0	0	0	0	0	0	0	0	2
sp|Q9WTL7|LYPA2_MOUSE	Lypla2	Acyl-protein thioesterase 2 OS=Mus musculus GN=Lypla2 PE=1 SV=1	0	1	1	1	1	3	0	1	4	2	2	1	0	0	1	1
sp|P17897|LYZ1_MOUSE	Lyz1	Lysozyme C-1 OS=Mus musculus GN=Lyz1 PE=1 SV=1	1	0	0	0	1	2	0	0	0	1	1	0	0	1	0	0
sp|Q9QXZ0|MACF1_MOUSE	Macf1	Microtubule-actin cross-linking factor 1 OS=Mus musculus GN=Macf1 PE=1 SV=2	0	0	4	2	0	0	2	0	1	0	3	1	0	0	1	3
sp|Q80U28|MADD_MOUSE	Madd	MAP kinase-activating death domain protein OS=Mus musculus GN=Madd PE=1 SV=2	0	2	3	3	0	0	0	0	1	2	0	1	1	0	0	0
sp|P20917|MAG_MOUSE	Mag	Myelin-associated glycoprotein OS=Mus musculus GN=Mag PE=1 SV=2	0	4	2	2	0	6	3	2	0	1	3	4	1	4	3	4
sp|Q8BI08|MAL2_MOUSE	Mal2	Protein MAL2 OS=Mus musculus GN=Mal2 PE=1 SV=1	0	0	1	0	0	0	0	0	0	0	0	0	0	0	0	0
E2QJ64_ECOLX	malE	Maltose-binding periplasmic protein OS=Escherichia coli GN=malE PE=4 SV=1	8	3	0	0	0	0	0	0	0	0	0	0	0	5	0	0
sp|Q64133|AOFA_MOUSE	Maoa	Amine oxidase [flavin-containing] A OS=Mus musculus GN=Maoa PE=1 SV=3	0	0	2	3	0	1	2	2	1	1	2	3	1	3	3	3
sp|Q8BW75|AOFB_MOUSE	Maob	Amine oxidase [flavin-containing] B OS=Mus musculus GN=Maob PE=1 SV=4	1	2	2	2	1	1	0	3	2	0	2	2	0	11	0	4
sp|Q9QYR6|MAP1A_MOUSE	Map1a	Microtubule-associated protein 1A OS=Mus musculus GN=Map1a PE=1 SV=2	33	44	38	40	43	36	28	32	40	37	34	34	31	49	33	27
sp|P14873|MAP1B_MOUSE	Map1b	Microtubule-associated protein 1B OS=Mus musculus GN=Map1b PE=1 SV=2	34	31	27	27	23	31	21	28	23	15	14	22	14	12	24	33
sp|P20357|MTAP2_MOUSE	Map2	Microtubule-associated protein 2 OS=Mus musculus GN=Map2 PE=1 SV=2	78	93	42	51	43	90	42	41	51	49	45	48	79	87	51	52
sp|P31938|MP2K1_MOUSE	Map2k1	Dual specificity mitogen-activated protein kinase kinase 1 OS=Mus musculus GN=Map2k1 PE=1 SV=2	0	5	5	3	0	0	2	3	0	0	3	3	0	0	5	3
sp|P47809|MP2K4_MOUSE	Map2k4	Dual specificity mitogen-activated protein kinase kinase 4 OS=Mus musculus GN=Map2k4 PE=1 SV=2	0	0	0	0	0	0	0	0	0	0	0	0	0	0	1	1
sp|P27546|MAP4_MOUSE	Map4	Microtubule-associated protein 4 OS=Mus musculus GN=Map4 PE=1 SV=3	0	1	5	2	0	8	1	3	3	1	0	2	2	0	3	4
sp|P97820|M4K4_MOUSE	Map4k4	Mitogen-activated protein kinase kinase kinase kinase 4 OS=Mus musculus GN=Map4k4 PE=1 SV=1	0	0	1	1	0	0	1	1	1	0	1	1	1	0	2	1
sp|Q7TSJ2|MAP6_MOUSE	Map6	Microtubule-associated protein 6 OS=Mus musculus GN=Map6 PE=1 SV=2	12	19	11	19	12	35	21	10	17	25	23	20	6	22	22	25
sp|A2AJI0|MA7D1_MOUSE	Map7d1	MAP7 domain-containing protein 1 OS=Mus musculus GN=Map7d1 PE=1 SV=1	0	0	0	1	0	0	0	0	0	0	0	0	0	0	0	0
sp|A2AG50|MA7D2_MOUSE	Map7d2	MAP7 domain-containing protein 2 OS=Mus musculus GN=Map7d2 PE=1 SV=1	0	0	0	0	0	2	0	0	0	0	0	0	0	0	0	0
sp|P63085|MK01_MOUSE	Mapk1	Mitogen-activated protein kinase 1 OS=Mus musculus GN=Mapk1 PE=1 SV=3	1	8	1	3	0	0	0	2	0	0	0	0	3	0	1	2
sp|Q61831|MK10_MOUSE	Mapk10	Mitogen-activated protein kinase 10 OS=Mus musculus GN=Mapk10 PE=1 SV=2	0	0	1	2	0	1	0	0	0	0	0	0	0	0	1	2
sp|Q63844|MK03_MOUSE	Mapk3	Mitogen-activated protein kinase 3 OS=Mus musculus GN=Mapk3 PE=1 SV=5	0	3	0	0	0	0	0	0	2	0	0	0	0	0	0	0
sp|Q8R001|MARE2_MOUSE	Mapre2	Microtubule-associated protein RP/EB family member 2 OS=Mus musculus GN=Mapre2 PE=1 SV=1	0	2	5	4	0	5	3	4	3	2	6	7	3	0	4	5
sp|Q6PER3|MARE3_MOUSE	Mapre3	Microtubule-associated protein RP/EB family member 3 OS=Mus musculus GN=Mapre3 PE=1 SV=1	0	10	2	2	0	6	2	2	0	0	0	0	0	0	0	0
sp|P10637|TAU_MOUSE	Mapt	Microtubule-associated protein tau OS=Mus musculus GN=Mapt PE=1 SV=3	18	12	6	10	3	14	10	6	8	3	10	6	9	13	16	8
sp|P26645|MARCS_MOUSE	Marcks	Myristoylated alanine-rich C-kinase substrate OS=Mus musculus GN=Marcks PE=1 SV=2	1	3	0	2	1	4	2	0	1	6	0	0	2	4	0	0
sp|Q8VHJ5|MARK1_MOUSE	Mark1	Serine/threonine-protein kinase MARK1 OS=Mus musculus GN=Mark1 PE=1 SV=2	0	2	0	1	0	0	0	0	0	0	0	0	0	0	0	0
sp|Q03141|MARK3_MOUSE	Mark3	MAP/microtubule affinity-regulating kinase 3 OS=Mus musculus GN=Mark3 PE=1 SV=2	0	0	0	1	0	0	0	0	0	0	0	0	0	0	0	0
sp|Q8CIP4|MARK4_MOUSE	Mark4	MAP/microtubule affinity-regulating kinase 4 OS=Mus musculus GN=Mark4 PE=1 SV=1	0	0	0	0	0	0	0	1	0	0	0	0	0	0	0	0
sp|P98064|MASP1_MOUSE	Masp1	Mannan-binding lectin serine protease 1 OS=Mus musculus GN=Masp1 PE=1 SV=2	1	0	3	2	1	1	1	1	2	2	2	0	1	3	1	0
sp|Q3THS6|METK2_MOUSE	Mat2a	S-adenosylmethionine synthase isoform type-2 OS=Mus musculus GN=Mat2a PE=1 SV=2	0	1	0	0	0	2	0	0	0	0	0	0	0	0	0	0
sp|Q99LB6|MAT2B_MOUSE	Mat2b	Methionine adenosyltransferase 2 subunit beta OS=Mus musculus GN=Mat2b PE=1 SV=1	0	0	0	1	0	0	0	1	0	0	0	0	0	0	1	0
sp|P41242|MATK_MOUSE	Matk	Megakaryocyte-associated tyrosine-protein kinase OS=Mus musculus GN=Matk PE=1 SV=2	0	1	0	0	0	0	0	0	0	0	0	0	0	0	0	0
sp|Q8K310|MATR3_MOUSE	Matr3	Matrin-3 OS=Mus musculus GN=Matr3 PE=1 SV=1	0	1	0	1	0	3	0	0	0	1	0	1	0	1	0	3
sp|P04370|MBP_MOUSE	Mbp	Myelin basic protein OS=Mus musculus GN=Mbp PE=1 SV=2	13	38	12	15	15	71	11	11	6	10	14	17	8	11	12	13
sp|Q99MR8|MCCA_MOUSE	Mccc1	Methylcrotonoyl-CoA carboxylase subunit alpha, mitochondrial OS=Mus musculus GN=Mccc1 PE=1 SV=2	125	41	67	94	110	46	101	50	85	136	112	108	176	168	66	69
sp|Q3UMR5|MCU_MOUSE	Mcu	Calcium uniporter protein, mitochondrial OS=Mus musculus GN=Mcu PE=1 SV=2	0	0	1	1	1	0	0	0	0	0	0	0	0	0	1	0
sp|P14152|MDHC_MOUSE	Mdh1	Malate dehydrogenase, cytoplasmic OS=Mus musculus GN=Mdh1 PE=1 SV=3	10	29	6	11	17	23	7	11	6	5	9	7	12	11	10	10
sp|P08249|MDHM_MOUSE	Mdh2	Malate dehydrogenase, mitochondrial OS=Mus musculus GN=Mdh2 PE=1 SV=3	12	26	19	21	13	55	17	22	16	19	17	18	14	17	20	23
sp|P06801|MAOX_MOUSE	Me1	NADP-dependent malic enzyme OS=Mus musculus GN=Me1 PE=1 SV=2	0	2	0	1	0	0	0	3	0	0	0	0	0	0	1	1
sp|Q99KE1|MAOM_MOUSE	Me2	NAD-dependent malic enzyme, mitochondrial OS=Mus musculus GN=Me2 PE=1 SV=1	0	1	0	1	0	0	0	2	0	0	0	1	0	0	1	0
sp|Q8BMF3|MAON_MOUSE	Me3	NADP-dependent malic enzyme, mitochondrial OS=Mus musculus GN=Me3 PE=1 SV=2	0	0	0	1	0	7	0	0	1	0	0	0	0	0	0	3
sp|Q9DCS3|MECR_MOUSE	Mecr	Enoyl-[acyl-carrier-protein] reductase, mitochondrial OS=Mus musculus GN=Mecr PE=1 SV=2	0	1	0	0	0	0	0	0	0	0	0	0	0	0	0	0
tr|Q5I0W6|Q5I0W6_MOUSE	Mettl7a2	Methyltransferase like 7A2 OS=Mus musculus GN=Mettl7a2 PE=2 SV=1	0	0	1	1	0	0	0	0	0	0	0	0	0	0	0	0
sp|Q9D1H9|MFAP4_MOUSE	Mfap4	Microfibril-associated glycoprotein 4 OS=Mus musculus GN=Mfap4 PE=1 SV=1	0	0	0	0	0	8	0	3	0	0	3	0	0	4	2	2
sp|Q6PCP5|MFF_MOUSE	Mff	Mitochondrial fission factor OS=Mus musculus GN=Mff PE=1 SV=1	0	1	0	0	0	2	0	0	0	0	0	0	0	0	0	0
sp|Q80U63|MFN2_MOUSE	Mfn2	Mitofusin-2 OS=Mus musculus GN=Mfn2 PE=1 SV=3	0	1	0	2	0	2	0	2	0	0	2	0	0	0	1	2
tr|D3Z183|D3Z183_MOUSE	Mfsd6	Major facilitator superfamily domain-containing protein 6 OS=Mus musculus GN=Mfsd6 PE=1 SV=1	0	0	0	0	0	2	0	0	0	0	0	0	0	0	0	0
sp|Q10470|MGAT3_MOUSE	Mgat3	Beta-1,4-mannosyl-glycoprotein 4-beta-N-acetylglucosaminyltransferase OS=Mus musculus GN=Mgat3 PE=1 SV=2	0	0	0	0	0	0	0	0	0	0	0	1	0	0	0	0
sp|Q9CPU4|MGST3_MOUSE	Mgst3	Microsomal glutathione S-transferase 3 OS=Mus musculus GN=Mgst3 PE=1 SV=1	1	0	1	2	0	0	1	1	0	0	1	1	0	2	2	2
sp|Q8CJ19|MICA3_MOUSE	Mical3	[F-actin]-methionine sulfoxide oxidase MICAL3 OS=Mus musculus GN=Mical3 PE=1 SV=2	0	0	0	0	0	0	0	0	0	0	0	0	1	0	0	0
sp|Q9JM52|MINK1_MOUSE	Mink1	Misshapen-like kinase 1 OS=Mus musculus GN=Mink1 PE=1 SV=3	0	0	3	3	0	0	0	0	0	0	1	1	2	0	0	1
tr|Q6ZPS1|Q6ZPS1_MOUSE	mKIAA1395	MKIAA1395 protein (Fragment) OS=Mus musculus GN=mKIAA1395 PE=3 SV=2	0	0	0	0	0	0	0	0	0	1	0	0	0	0	0	0
sp|Q8VHK5|MLC1_MOUSE	Mlc1	Membrane protein MLC1 OS=Mus musculus GN=Mlc1 PE=1 SV=1	0	0	1	0	0	0	0	1	1	4	1	1	0	0	1	1
sp|Q6ZQI3|MLEC_MOUSE	Mlec	Malectin OS=Mus musculus GN=Mlec PE=1 SV=2	1	0	1	3	1	3	1	1	0	0	2	1	2	8	3	1
sp|Q99KX1|MLF2_MOUSE	Mlf2	Myeloid leukemia factor 2 OS=Mus musculus GN=Mlf2 PE=1 SV=1	0	0	0	0	0	1	0	0	0	0	0	0	0	0	0	0
sp|Q6PEB6|PHOCN_MOUSE	Mob4	MOB-like protein phocein OS=Mus musculus GN=Mob4 PE=1 SV=1	0	0	0	0	0	2	0	0	0	0	0	0	0	0	0	0
sp|Q61885|MOG_MOUSE	Mog	Myelin-oligodendrocyte glycoprotein OS=Mus musculus GN=Mog PE=1 SV=1	18	11	9	8	7	9	6	7	10	3	9	9	9	3	8	8
sp|P56379|68MP_MOUSE	Mp68	6.8 kDa mitochondrial proteolipid OS=Mus musculus GN=Mp68 PE=1 SV=1	0	2	0	4	0	11	3	4	2	2	5	3	2	3	5	2
sp|P63030|MPC1_MOUSE	Mpc1	Mitochondrial pyruvate carrier 1 OS=Mus musculus GN=Mpc1 PE=1 SV=1	0	0	0	0	0	0	0	0	2	1	0	0	0	0	0	0
sp|Q9D023|MPC2_MOUSE	Mpc2	Mitochondrial pyruvate carrier 2 OS=Mus musculus GN=Mpc2 PE=1 SV=1	0	0	4	3	1	0	2	6	3	1	3	2	0	2	5	4
sp|Q924M7|MPI_MOUSE	Mpi	Mannose-6-phosphate isomerase OS=Mus musculus GN=Mpi PE=1 SV=1	0	1	3	0	0	7	1	2	2	0	2	3	0	0	1	0
sp|Q9WV34|MPP2_MOUSE	Mpp2	MAGUK p55 subfamily member 2 OS=Mus musculus GN=Mpp2 PE=1 SV=1	0	0	0	0	0	1	0	3	0	0	0	0	0	0	0	2
tr|B9EHZ5|B9EHZ5_MOUSE	Mpp6	Membrane protein, palmitoylated 6 (MAGUK p55 subfamily member 6) OS=Mus musculus GN=Mpp6 PE=2 SV=1	0	0	0	0	0	1	0	0	0	0	0	0	0	0	0	0
sp|Q99J99|THTM_MOUSE	Mpst	3-mercaptopyruvate sulfurtransferase OS=Mus musculus GN=Mpst PE=1 SV=3	0	1	1	0	0	1	0	0	0	0	0	0	0	0	0	0
sp|P26041|MOES_MOUSE	Msn	Moesin OS=Mus musculus GN=Msn PE=1 SV=3	0	1	1	0	0	0	0	0	0	0	0	0	0	0	0	0
sp|P00416|COX3_MOUSE	mt-Co3	Cytochrome c oxidase subunit 3 OS=Mus musculus GN=mt-Co3 PE=1 SV=2	0	0	0	0	0	0	0	0	0	1	0	0	0	0	0	0
sp|Q9CQ65|MTAP_MOUSE	Mtap	S-methyl-5'-thioadenosine phosphorylase OS=Mus musculus GN=Mtap PE=1 SV=1	0	0	0	0	0	0	0	0	0	0	0	0	0	0	0	1
sp|P03930|ATP8_MOUSE	Mtatp8	ATP synthase protein 8 OS=Mus musculus GN=Mtatp8 PE=1 SV=1	1	1	2	2	0	5	2	2	1	0	2	2	0	2	1	2
sp|Q791T5|MTCH1_MOUSE	Mtch1	Mitochondrial carrier homolog 1 OS=Mus musculus GN=Mtch1 PE=1 SV=1	0	3	3	4	0	10	2	5	3	0	3	3	0	0	4	3
sp|Q791V5|MTCH2_MOUSE	Mtch2	Mitochondrial carrier homolog 2 OS=Mus musculus GN=Mtch2 PE=1 SV=1	0	0	7	5	0	7	4	5	0	0	4	3	0	0	3	2
sp|P00405|COX2_MOUSE	Mtco2	Cytochrome c oxidase subunit 2 OS=Mus musculus GN=Mtco2 PE=1 SV=1	0	1	0	0	0	4	0	2	3	0	0	0	1	0	0	0
sp|Q922D8|C1TC_MOUSE	Mthfd1	C-1-tetrahydrofolate synthase, cytoplasmic OS=Mus musculus GN=Mthfd1 PE=1 SV=4	0	0	2	3	0	3	0	2	0	0	0	0	0	0	1	2
sp|Q9Z2C9|MTMR7_MOUSE	Mtmr7	Myotubularin-related protein 7 OS=Mus musculus GN=Mtmr7 PE=1 SV=2	0	0	0	0	0	0	0	0	0	0	0	0	0	0	1	0
sp|P03888|NU1M_MOUSE	Mtnd1	NADH-ubiquinone oxidoreductase chain 1 OS=Mus musculus GN=Mtnd1 PE=1 SV=3	0	0	0	0	0	0	0	0	0	0	0	0	0	0	2	0
sp|P03893|NU2M_MOUSE	Mtnd2	NADH-ubiquinone oxidoreductase chain 2 OS=Mus musculus GN=Mtnd2 PE=1 SV=2	0	0	0	0	0	0	0	1	0	0	0	0	0	0	0	0
sp|P62774|MTPN_MOUSE	Mtpn	Myotrophin OS=Mus musculus GN=Mtpn PE=1 SV=2	1	1	1	1	1	3	1	1	1	0	2	1	2	1	1	1
sp|P28665|MUG1_MOUSE	Mug1	Murinoglobulin-1 OS=Mus musculus GN=Mug1 PE=1 SV=3	0	0	0	1	0	0	0	0	0	0	0	0	0	0	0	0
sp|A2BIM8|MUP18_MOUSE	Mup18	Major urinary protein 18 OS=Mus musculus GN=Mup18 PE=3 SV=1	1	0	0	0	0	0	0	0	0	0	0	0	0	0	0	0
sp|Q9CPT4|MYDGF_MOUSE	Mydgf	Myeloid-derived growth factor OS=Mus musculus GN=Mydgf PE=1 SV=1	0	0	0	0	0	1	0	0	0	0	0	0	0	0	0	0
sp|Q61879|MYH10_MOUSE	Myh10	Myosin-10 OS=Mus musculus GN=Myh10 PE=1 SV=2	1	9	4	4	0	6	0	6	3	0	3	1	2	2	4	5
sp|P13541|MYH3_MOUSE	Myh3	Myosin-3 OS=Mus musculus GN=Myh3 PE=2 SV=2	0	0	0	0	0	0	0	0	0	0	0	0	0	5	0	0
sp|Q91Z83|MYH7_MOUSE	Myh7	Myosin-7 OS=Mus musculus GN=Myh7 PE=2 SV=1	0	0	0	0	0	0	0	0	0	0	0	0	0	1	0	0
sp|A2AQP0|MYH7B_MOUSE	Myh7b	Myosin-7B OS=Mus musculus GN=Myh7b PE=3 SV=1	0	4	0	0	0	0	0	0	0	0	0	0	0	0	0	0
sp|Q8CI43|MYL6B_MOUSE	Myl6b	Myosin light chain 6B OS=Mus musculus GN=Myl6b PE=1 SV=1	0	1	0	1	0	0	1	0	1	0	1	1	0	0	1	2
sp|Q9JMH9|MY18A_MOUSE	Myo18a	Unconventional myosin-XVIIIa OS=Mus musculus GN=Myo18a PE=1 SV=2	0	0	0	0	0	2	0	0	0	0	0	0	0	0	0	0
sp|Q5SYD0|MYO1D_MOUSE	Myo1d	Unconventional myosin-Id OS=Mus musculus GN=Myo1d PE=1 SV=1	0	0	3	0	0	0	0	1	0	0	0	0	0	0	0	0
sp|Q99104|MYO5A_MOUSE	Myo5a	Unconventional myosin-Va OS=Mus musculus GN=Myo5a PE=1 SV=2	0	0	3	4	2	2	5	5	3	7	3	6	0	2	9	5
sp|P21271|MYO5B_MOUSE	Myo5b	Unconventional myosin-Vb OS=Mus musculus GN=Myo5b PE=1 SV=2	0	3	0	0	0	0	0	1	0	0	0	1	0	1	0	0
sp|P12979|MYOG_MOUSE	Myog	Myogenin OS=Mus musculus GN=Myog PE=1 SV=2	0	0	0	0	0	0	0	0	0	0	1	0	0	0	0	2
sp|P70670|NACAM_MOUSE	Naca	Nascent polypeptide-associated complex subunit alpha, muscle-specific form OS=Mus musculus GN=Naca PE=1 SV=2	6	6	2	1	1	3	1	2	4	2	0	0	1	1	0	0
sp|Q8C5H8|NAKD2_MOUSE	Nadk2	NAD kinase 2, mitochondrial OS=Mus musculus GN=Nadk2 PE=1 SV=2	0	0	0	0	0	2	0	0	0	0	0	0	0	0	0	0
sp|Q8VBW6|ULA1_MOUSE	Nae1	NEDD8-activating enzyme E1 regulatory subunit OS=Mus musculus GN=Nae1 PE=1 SV=1	0	0	1	2	0	0	1	1	0	0	1	1	0	0	1	1
sp|Q78ZA7|NP1L4_MOUSE	Nap1l4	Nucleosome assembly protein 1-like 4 OS=Mus musculus GN=Nap1l4 PE=1 SV=1	0	0	0	0	0	3	0	0	1	0	0	0	0	0	0	0
sp|Q9DB05|SNAA_MOUSE	Napa	Alpha-soluble NSF attachment protein OS=Mus musculus GN=Napa PE=1 SV=1	0	7	3	3	0	11	3	4	0	0	1	2	0	0	1	2
sp|P28663|SNAB_MOUSE	Napb	Beta-soluble NSF attachment protein OS=Mus musculus GN=Napb PE=1 SV=2	0	11	12	13	0	17	6	12	3	0	6	6	0	1	4	7
sp|Q9CWZ7|SNAG_MOUSE	Napg	Gamma-soluble NSF attachment protein OS=Mus musculus GN=Napg PE=1 SV=1	0	5	0	5	0	5	1	0	1	0	0	0	0	0	0	4
sp|Q8BP47|SYNC_MOUSE	Nars	Asparagine--tRNA ligase, cytoplasmic OS=Mus musculus GN=Nars PE=1 SV=2	0	3	6	9	0	1	0	6	0	0	1	1	0	1	5	6
sp|Q9CZ42|NNRD_MOUSE	Naxd	ATP-dependent (S)-NAD(P)H-hydrate dehydratase OS=Mus musculus GN=Naxd PE=1 SV=1	0	0	0	0	0	4	0	0	0	0	0	0	0	0	0	0
sp|Q8K4Z3|NNRE_MOUSE	Naxe	NAD(P)H-hydrate epimerase OS=Mus musculus GN=Naxe PE=1 SV=1	0	2	1	1	1	1	0	1	2	0	0	2	0	0	2	1
sp|Q9EPN1|NBEA_MOUSE	Nbea	Neurobeachin OS=Mus musculus GN=Nbea PE=1 SV=1	2	0	7	8	0	3	4	6	5	0	5	3	4	0	4	6
sp|Q91X97|NCALD_MOUSE	Ncald	Neurocalcin-delta OS=Mus musculus GN=Ncald PE=1 SV=4	0	1	0	0	0	4	0	0	0	0	0	0	0	0	0	0
sp|P13595|NCAM1_MOUSE	Ncam1	Neural cell adhesion molecule 1 OS=Mus musculus GN=Ncam1 PE=1 SV=3	12	28	25	18	27	36	21	20	13	8	22	18	16	16	25	26
sp|O35136|NCAM2_MOUSE	Ncam2	Neural cell adhesion molecule 2 OS=Mus musculus GN=Ncam2 PE=1 SV=1	3	4	9	6	0	7	7	13	13	3	5	6	2	0	11	6
sp|P55066|NCAN_MOUSE	Ncan	Neurocan core protein OS=Mus musculus GN=Ncan PE=1 SV=1	0	0	1	0	0	0	1	4	0	0	0	0	0	0	1	0
sp|Q9Z0E0|NCDN_MOUSE	Ncdn	Neurochondrin OS=Mus musculus GN=Ncdn PE=1 SV=1	4	11	9	10	7	1	3	11	5	5	4	6	3	11	10	9
sp|Q8BLF1|NCEH1_MOUSE	Nceh1	Neutral cholesterol ester hydrolase 1 OS=Mus musculus GN=Nceh1 PE=1 SV=1	0	0	2	3	0	0	2	4	0	1	3	4	3	1	4	2
sp|P28660|NCKP1_MOUSE	Nckap1	Nck-associated protein 1 OS=Mus musculus GN=Nckap1 PE=1 SV=2	0	7	12	9	0	5	8	14	7	5	6	7	1	0	9	12
sp|Q9ESJ4|SPN90_MOUSE	Nckipsd	NCK-interacting protein with SH3 domain OS=Mus musculus GN=Nckipsd PE=1 SV=2	1	0	0	0	0	0	0	0	0	0	0	0	0	0	0	0
sp|Q8BNY6|NCS1_MOUSE	Ncs1	Neuronal calcium sensor 1 OS=Mus musculus GN=Ncs1 PE=1 SV=3	0	0	0	0	0	1	0	0	0	0	0	0	0	0	0	0
sp|Q62433|NDRG1_MOUSE	Ndrg1	Protein NDRG1 OS=Mus musculus GN=Ndrg1 PE=1 SV=1	1	1	0	0	0	3	0	0	0	0	0	0	0	1	0	0
sp|Q9QYG0|NDRG2_MOUSE	Ndrg2	Protein NDRG2 OS=Mus musculus GN=Ndrg2 PE=1 SV=1	1	3	2	5	1	4	4	1	2	0	1	5	1	0	5	4
sp|Q9QYF9|NDRG3_MOUSE	Ndrg3	Protein NDRG3 OS=Mus musculus GN=Ndrg3 PE=1 SV=1	0	0	0	1	0	3	0	0	0	0	0	0	0	0	0	0
sp|Q8BTG7|NDRG4_MOUSE	Ndrg4	Protein NDRG4 OS=Mus musculus GN=Ndrg4 PE=1 SV=1	0	0	1	1	0	0	1	1	1	0	1	0	0	0	1	1
sp|Q9D8B4|NDUAB_MOUSE	Ndufa11	NADH dehydrogenase [ubiquinone] 1 alpha subcomplex subunit 11 OS=Mus musculus GN=Ndufa11 PE=1 SV=2	0	0	0	2	0	0	1	2	0	0	0	0	0	0	2	1
sp|Q9CQ75|NDUA2_MOUSE	Ndufa2	NADH dehydrogenase [ubiquinone] 1 alpha subcomplex subunit 2 OS=Mus musculus GN=Ndufa2 PE=1 SV=3	0	7	0	0	0	2	0	0	0	0	0	0	0	0	0	0
sp|Q62425|NDUA4_MOUSE	Ndufa4	Cytochrome c oxidase subunit NDUFA4 OS=Mus musculus GN=Ndufa4 PE=1 SV=2	8	8	7	5	2	25	3	5	2	9	6	5	9	6	4	5
sp|Q9Z1P6|NDUA7_MOUSE	Ndufa7	NADH dehydrogenase [ubiquinone] 1 alpha subcomplex subunit 7 OS=Mus musculus GN=Ndufa7 PE=1 SV=3	0	4	0	0	0	0	1	0	0	1	0	0	0	0	0	0
sp|Q9DC69|NDUA9_MOUSE	Ndufa9	NADH dehydrogenase [ubiquinone] 1 alpha subcomplex subunit 9, mitochondrial OS=Mus musculus GN=Ndufa9 PE=1 SV=2	0	0	0	0	1	0	0	2	0	0	0	0	0	0	0	0
sp|Q9DCS9|NDUBA_MOUSE	Ndufb10	NADH dehydrogenase [ubiquinone] 1 beta subcomplex subunit 10 OS=Mus musculus GN=Ndufb10 PE=1 SV=3	0	0	0	0	0	1	0	0	0	0	0	0	0	0	0	0
sp|O09111|NDUBB_MOUSE	Ndufb11	NADH dehydrogenase [ubiquinone] 1 beta subcomplex subunit 11, mitochondrial OS=Mus musculus GN=Ndufb11 PE=1 SV=2	0	0	0	1	0	0	2	2	0	0	0	0	0	0	0	0
sp|Q9CQC7|NDUB4_MOUSE	Ndufb4	NADH dehydrogenase [ubiquinone] 1 beta subcomplex subunit 4 OS=Mus musculus GN=Ndufb4 PE=1 SV=3	0	5	0	0	0	1	1	2	0	0	0	0	1	0	0	0
sp|Q9CQH3|NDUB5_MOUSE	Ndufb5	NADH dehydrogenase [ubiquinone] 1 beta subcomplex subunit 5, mitochondrial OS=Mus musculus GN=Ndufb5 PE=1 SV=1	0	0	1	0	0	0	0	1	0	0	0	1	0	0	0	0
sp|Q3UIU2|NDUB6_MOUSE	Ndufb6	NADH dehydrogenase [ubiquinone] 1 beta subcomplex subunit 6 OS=Mus musculus GN=Ndufb6 PE=1 SV=3	0	0	0	0	0	0	0	0	2	0	0	0	0	0	0	0
sp|Q9CR61|NDUB7_MOUSE	Ndufb7	NADH dehydrogenase [ubiquinone] 1 beta subcomplex subunit 7 OS=Mus musculus GN=Ndufb7 PE=1 SV=3	0	1	0	0	0	1	0	0	0	0	0	0	0	0	0	0
sp|Q91VD9|NDUS1_MOUSE	Ndufs1	NADH-ubiquinone oxidoreductase 75 kDa subunit, mitochondrial OS=Mus musculus GN=Ndufs1 PE=1 SV=2	0	0	1	0	0	1	0	3	0	0	0	0	0	0	0	0
sp|Q9DCT2|NDUS3_MOUSE	Ndufs3	NADH dehydrogenase [ubiquinone] iron-sulfur protein 3, mitochondrial OS=Mus musculus GN=Ndufs3 PE=1 SV=2	0	0	0	0	0	5	0	1	0	0	0	0	0	0	0	0
sp|Q9CXZ1|NDUS4_MOUSE	Ndufs4	NADH dehydrogenase [ubiquinone] iron-sulfur protein 4, mitochondrial OS=Mus musculus GN=Ndufs4 PE=1 SV=3	0	0	0	0	0	1	0	0	0	0	0	0	0	0	0	0
sp|Q9DC70|NDUS7_MOUSE	Ndufs7	NADH dehydrogenase [ubiquinone] iron-sulfur protein 7, mitochondrial OS=Mus musculus GN=Ndufs7 PE=1 SV=1	0	0	1	0	0	0	0	1	0	0	0	0	0	0	0	0
sp|Q91YT0|NDUV1_MOUSE	Ndufv1	NADH dehydrogenase [ubiquinone] flavoprotein 1, mitochondrial OS=Mus musculus GN=Ndufv1 PE=1 SV=1	0	0	0	0	0	2	0	5	0	0	0	0	0	0	0	0
sp|Q9DC07|LNEBL_MOUSE	Nebl	LIM zinc-binding domain-containing Nebulette OS=Mus musculus GN=Nebl PE=1 SV=1	0	0	0	0	0	10	0	0	0	0	0	0	0	0	0	0
sp|Q8BG18|NECA1_MOUSE	Necab1	N-terminal EF-hand calcium-binding protein 1 OS=Mus musculus GN=Necab1 PE=1 SV=1	0	0	0	0	0	2	0	0	0	0	0	0	0	0	0	0
sp|Q9CR95|NECP1_MOUSE	Necap1	Adaptin ear-binding coat-associated protein 1 OS=Mus musculus GN=Necap1 PE=1 SV=2	2	5	3	2	1	10	3	2	2	5	2	4	9	2	1	3
sp|P19246|NFH_MOUSE	Nefh	Neurofilament heavy polypeptide OS=Mus musculus GN=Nefh PE=1 SV=3	1	14	2	2	0	13	1	2	4	2	0	2	2	2	1	1
sp|P08551|NFL_MOUSE	Nefl	Neurofilament light polypeptide OS=Mus musculus GN=Nefl PE=1 SV=5	11	34	8	6	4	58	10	7	5	3	4	8	9	13	5	8
sp|P08553|NFM_MOUSE	Nefm	Neurofilament medium polypeptide OS=Mus musculus GN=Nefm PE=1 SV=4	4	43	5	7	4	43	8	2	4	4	3	8	1	8	7	5
sp|Q80Z24|NEGR1_MOUSE	Negr1	Neuronal growth regulator 1 OS=Mus musculus GN=Negr1 PE=1 SV=1	0	0	1	0	0	1	0	1	2	0	0	1	0	0	1	1
sp|Q04690|NF1_MOUSE	Nf1	Neurofibromin OS=Mus musculus GN=Nf1 PE=1 SV=1	1	0	2	1	0	0	0	0	0	0	1	0	0	0	1	0
sp|Q810U3|NFASC_MOUSE	Nfasc	Neurofascin OS=Mus musculus GN=Nfasc PE=1 SV=1	0	8	10	7	0	18	8	8	4	2	5	8	6	5	6	9
sp|Q9Z1J3|NFS1_MOUSE	Nfs1	Cysteine desulfurase, mitochondrial OS=Mus musculus GN=Nfs1 PE=1 SV=3	0	0	0	0	0	2	0	0	0	0	0	0	0	0	0	0
sp|Q8CHT1|NGEF_MOUSE	Ngef	Ephexin-1 OS=Mus musculus GN=Ngef PE=1 SV=1	0	0	3	5	0	0	0	0	0	0	0	0	0	0	4	4
tr|B9EJX2|B9EJX2_MOUSE	Nhs	NHS actin-remodeling regulator OS=Mus musculus GN=Nhs PE=1 SV=1	0	0	0	0	0	0	0	0	0	0	0	1	0	0	0	0
sp|O55125|NIPS1_MOUSE	Nipsnap1	Protein NipSnap homolog 1 OS=Mus musculus GN=Nipsnap1 PE=1 SV=1	0	0	1	1	0	2	1	1	1	0	1	1	0	0	1	1
sp|O55126|NIPS2_MOUSE	Nipsnap2	Protein NipSnap homolog 2 OS=Mus musculus GN=Nipsnap2 PE=1 SV=1	0	4	0	0	0	7	0	0	0	0	0	0	0	0	0	0
sp|Q9CQE1|NPS3B_MOUSE	Nipsnap3b	Protein NipSnap homolog 3B OS=Mus musculus GN=Nipsnap3b PE=1 SV=1	0	0	0	0	0	2	0	1	0	0	0	0	1	0	1	0
sp|Q9JHW2|NIT2_MOUSE	Nit2	Omega-amidase NIT2 OS=Mus musculus GN=Nit2 PE=1 SV=1	0	1	0	0	0	0	0	0	0	0	0	0	2	0	0	0
sp|Q69ZK9|NLGN2_MOUSE	Nlgn2	Neuroligin-2 OS=Mus musculus GN=Nlgn2 PE=1 SV=2	0	0	1	0	0	0	0	1	1	0	1	0	0	0	0	2
sp|Q8BYM5|NLGN3_MOUSE	Nlgn3	Neuroligin-3 OS=Mus musculus GN=Nlgn3 PE=1 SV=2	0	0	0	3	0	0	0	2	1	0	0	2	0	0	1	1
sp|B0F2B4|NLGN4_MOUSE	Nlgn4l	Neuroligin 4-like OS=Mus musculus GN=Nlgn4l PE=1 SV=1	1	0	0	0	0	0	0	0	0	0	0	0	0	0	0	0
sp|P15532|NDKA_MOUSE	Nme1	Nucleoside diphosphate kinase A OS=Mus musculus GN=Nme1 PE=1 SV=1	0	8	0	5	0	11	0	2	5	0	0	4	1	0	3	0
sp|Q01768|NDKB_MOUSE	Nme2	Nucleoside diphosphate kinase B OS=Mus musculus GN=Nme2 PE=1 SV=1	0	1	0	0	0	2	1	0	0	0	0	0	0	0	0	0
sp|O70310|NMT1_MOUSE	Nmt1	Glycylpeptide N-tetradecanoyltransferase 1 OS=Mus musculus GN=Nmt1 PE=1 SV=1	0	0	2	1	0	1	1	2	0	0	2	2	0	0	1	2
sp|O70311|NMT2_MOUSE	Nmt2	Glycylpeptide N-tetradecanoyltransferase 2 OS=Mus musculus GN=Nmt2 PE=1 SV=1	0	0	0	1	0	0	0	0	1	0	0	0	0	0	1	0
sp|Q61941|NNTM_MOUSE	Nnt	NAD(P) transhydrogenase, mitochondrial OS=Mus musculus GN=Nnt PE=1 SV=2	0	0	4	4	0	3	0	5	2	0	5	5	0	0	5	2
sp|Q6GQT9|NOMO1_MOUSE	Nomo1	Nodal modulator 1 OS=Mus musculus GN=Nomo1 PE=1 SV=1	0	0	0	0	0	2	0	0	0	0	0	0	0	0	0	1
sp|Q99K48|NONO_MOUSE	Nono	Non-POU domain-containing octamer-binding protein OS=Mus musculus GN=Nono PE=1 SV=3	0	2	2	2	0	6	1	3	0	0	1	1	0	1	0	4
sp|Q11011|PSA_MOUSE	Npepps	Puromycin-sensitive aminopeptidase OS=Mus musculus GN=Npepps PE=1 SV=2	1	3	5	3	0	2	3	9	0	1	5	3	0	0	7	8
sp|Q61937|NPM_MOUSE	Npm1	Nucleophosmin OS=Mus musculus GN=Npm1 PE=1 SV=1	0	2	1	0	2	2	2	0	0	0	0	0	0	1	0	0
sp|P97300|NPTN_MOUSE	Nptn	Neuroplastin OS=Mus musculus GN=Nptn PE=1 SV=3	5	22	2	2	0	16	4	3	3	0	4	2	1	0	2	3
sp|Q62443|NPTX1_MOUSE	Nptx1	Neuronal pentraxin-1 OS=Mus musculus GN=Nptx1 PE=1 SV=1	0	0	0	1	0	0	0	0	1	0	0	0	0	0	0	0
sp|Q810U4|NRCAM_MOUSE	Nrcam	Neuronal cell adhesion molecule OS=Mus musculus GN=Nrcam PE=1 SV=2	0	5	0	3	0	2	0	0	0	0	0	1	0	0	0	3
sp|Q8BHG1|NRDC_MOUSE	Nrdc	Nardilysin OS=Mus musculus GN=Nrdc PE=1 SV=1	0	0	0	0	0	0	0	0	0	0	0	0	0	1	0	0
sp|P60761|NEUG_MOUSE	Nrgn	Neurogranin OS=Mus musculus GN=Nrgn PE=1 SV=1	2	4	2	3	2	3	1	2	2	3	3	2	4	4	3	3
sp|Q9CS84|NRX1A_MOUSE	Nrxn1	Neurexin-1 OS=Mus musculus GN=Nrxn1 PE=1 SV=3	0	0	0	2	0	1	0	3	0	0	0	5	0	4	0	2
tr|B2RX09|B2RX09_MOUSE	Nrxn2	Nrxn2 protein OS=Mus musculus GN=Nrxn2 PE=2 SV=1	0	0	0	0	0	1	0	0	0	0	0	0	0	0	0	0
sp|Q6P9K9|NRX3A_MOUSE	Nrxn3	Neurexin-3 OS=Mus musculus GN=Nrxn3 PE=1 SV=2	0	0	1	1	0	0	1	1	1	0	1	1	0	0	1	1
sp|P46460|NSF_MOUSE	Nsf	Vesicle-fusing ATPase OS=Mus musculus GN=Nsf PE=1 SV=2	9	35	34	32	14	43	25	36	9	6	21	31	17	18	23	31
sp|Q9CZ44|NSF1C_MOUSE	Nsfl1c	NSFL1 cofactor p47 OS=Mus musculus GN=Nsfl1c PE=1 SV=1	0	5	0	0	0	6	0	0	0	0	0	0	0	0	0	0
sp|Q9JM14|NT5C_MOUSE	Nt5c	5'(3')-deoxyribonucleotidase, cytosolic type OS=Mus musculus GN=Nt5c PE=1 SV=1	0	0	0	0	0	2	0	0	0	0	0	0	0	0	0	0
sp|Q3UHB1|NT5D3_MOUSE	Nt5dc3	5'-nucleotidase domain-containing protein 3 OS=Mus musculus GN=Nt5dc3 PE=1 SV=1	0	7	1	0	0	0	2	1	3	2	0	2	1	0	1	0
sp|Q99PJ0|NTRI_MOUSE	Ntm	Neurotrimin OS=Mus musculus GN=Ntm PE=1 SV=2	0	0	0	0	2	7	3	0	3	2	1	0	0	3	0	0
sp|P15209|NTRK2_MOUSE	Ntrk2	BDNF/NT-3 growth factors receptor OS=Mus musculus GN=Ntrk2 PE=1 SV=1	0	1	0	0	0	0	0	0	0	0	0	0	0	0	0	0
sp|O35685|NUDC_MOUSE	Nudc	Nuclear migration protein nudC OS=Mus musculus GN=Nudc PE=1 SV=1	0	0	0	0	0	4	0	0	0	0	0	0	0	0	0	0
sp|Q8R1N4|NUDC3_MOUSE	Nudcd3	NudC domain-containing protein 3 OS=Mus musculus GN=Nudcd3 PE=1 SV=3	0	0	0	0	0	2	0	0	0	0	0	0	0	0	0	0
sp|Q9JI46|NUDT3_MOUSE	Nudt3	Diphosphoinositol polyphosphate phosphohydrolase 1 OS=Mus musculus GN=Nudt3 PE=1 SV=1	0	0	1	3	0	1	1	2	1	0	1	1	0	4	1	3
sp|Q8R2U6|NUDT4_MOUSE	Nudt4	Diphosphoinositol polyphosphate phosphohydrolase 2 OS=Mus musculus GN=Nudt4 PE=1 SV=1	0	0	0	0	0	1	0	0	0	0	0	0	0	0	0	0
sp|Q6P5U7|NWD2_MOUSE	Nwd2	NACHT and WD repeat domain-containing protein 2 OS=Mus musculus GN=Nwd2 PE=1 SV=2	0	0	0	1	0	0	0	0	0	0	0	1	0	0	0	0
sp|P29758|OAT_MOUSE	Oat	Ornithine aminotransferase, mitochondrial OS=Mus musculus GN=Oat PE=1 SV=1	0	1	0	0	0	0	0	0	0	0	0	0	0	0	0	0
sp|Q9D8W7|OCAD2_MOUSE	Ociad2	OCIA domain-containing protein 2 OS=Mus musculus GN=Ociad2 PE=1 SV=1	1	0	0	0	0	0	0	1	0	0	0	0	0	0	0	1
sp|Q60597|ODO1_MOUSE	Ogdh	2-oxoglutarate dehydrogenase, mitochondrial OS=Mus musculus GN=Ogdh PE=1 SV=3	3	4	11	14	2	3	6	13	5	2	8	4	3	2	11	10
tr|B2RXT3|B2RXT3_MOUSE	Ogdhl	Ogdhl protein OS=Mus musculus GN=Ogdhl PE=2 SV=1	0	1	9	10	0	2	2	7	0	0	3	5	0	0	1	5
sp|Q8CGY8|OGT1_MOUSE	Ogt	UDP-N-acetylglucosamine--peptide N-acetylglucosaminyltransferase 110 kDa subunit OS=Mus musculus GN=Ogt PE=1 SV=2	0	0	2	3	0	0	0	2	0	0	0	0	0	0	0	0
sp|Q9CZ30|OLA1_MOUSE	Ola1	Obg-like ATPase 1 OS=Mus musculus GN=Ola1 PE=1 SV=1	0	1	0	0	0	4	0	0	0	0	0	0	0	0	0	0
sp|Q63912|OMGP_MOUSE	Omg	Oligodendrocyte-myelin glycoprotein OS=Mus musculus GN=Omg PE=1 SV=1	0	0	0	0	0	1	0	0	0	0	0	0	0	0	0	0
sp|P58281|OPA1_MOUSE	Opa1	Dynamin-like 120 kDa protein, mitochondrial OS=Mus musculus GN=Opa1 PE=1 SV=1	0	0	0	1	0	3	0	0	0	0	0	1	0	0	0	1
sp|Q505D7|OPA3_MOUSE	Opa3	Optic atrophy 3 protein homolog OS=Mus musculus GN=Opa3 PE=1 SV=1	0	0	0	0	0	0	0	0	0	0	0	0	0	0	0	1
sp|Q7M750|OPALI_MOUSE	Opalin	Opalin OS=Mus musculus GN=Opalin PE=1 SV=1	0	0	0	0	0	2	0	0	0	0	0	0	0	0	0	0
tr|Q6DFY2|Q6DFY2_MOUSE	Opcml	Opioid binding protein/cell adhesion molecule-like OS=Mus musculus GN=Opcml PE=1 SV=1	1	0	0	1	0	0	0	0	1	0	0	0	0	1	0	0
sp|Q3B7Z2|OSBP1_MOUSE	Osbp	Oxysterol-binding protein 1 OS=Mus musculus GN=Osbp PE=1 SV=3	0	0	2	2	0	3	1	3	0	0	3	0	0	0	5	2
sp|Q5QNQ6|OSBP2_MOUSE	Osbp2	Oxysterol-binding protein 2 OS=Mus musculus GN=Osbp2 PE=1 SV=1	0	0	0	1	0	2	0	0	0	0	0	0	0	0	0	0
sp|Q91XL9|OSBL1_MOUSE	Osbpl1a	Oxysterol-binding protein-related protein 1 OS=Mus musculus GN=Osbpl1a PE=1 SV=2	0	0	0	0	0	0	0	1	0	0	0	0	0	0	1	1
sp|B9EJ86|OSBL8_MOUSE	Osbpl8	Oxysterol-binding protein-related protein 8 OS=Mus musculus GN=Osbpl8 PE=1 SV=1	0	0	0	0	0	0	0	0	1	0	0	0	0	0	1	0
sp|Q8BHW2|OSCP1_MOUSE	Oscp1	Protein OSCP1 OS=Mus musculus GN=Oscp1 PE=1 SV=1	0	0	0	0	0	4	0	0	0	0	0	0	0	0	0	0
tr|A0A1G5SLK1|A0A1G5SLK1_MOUSE	OTTMUSCASG00059416	Schlafen family member 3 OS=Mus musculus GN=OTTMUSCASG00059416 PE=4 SV=1	0	0	0	0	0	1	0	0	0	0	0	0	0	0	0	0
sp|Q7TQI3|OTUB1_MOUSE	Otub1	Ubiquitin thioesterase OTUB1 OS=Mus musculus GN=Otub1 PE=1 SV=2	1	5	7	6	1	9	5	7	3	1	3	3	5	6	6	3
sp|Q9D0K2|SCOT1_MOUSE	Oxct1	Succinyl-CoA:3-ketoacid coenzyme A transferase 1, mitochondrial OS=Mus musculus GN=Oxct1 PE=1 SV=1	0	7	7	3	5	21	7	6	5	3	3	5	1	2	4	7
sp|Q4KMM3|OXR1_MOUSE	Oxr1	Oxidation resistance protein 1 OS=Mus musculus GN=Oxr1 PE=1 SV=3	0	8	4	5	2	5	2	5	0	1	4	4	0	4	3	7
sp|P09103|PDIA1_MOUSE	P4hb	Protein disulfide-isomerase OS=Mus musculus GN=P4hb PE=1 SV=2	0	2	0	0	0	1	1	0	0	0	0	0	0	0	0	0
sp|P50580|PA2G4_MOUSE	Pa2g4	Proliferation-associated protein 2G4 OS=Mus musculus GN=Pa2g4 PE=1 SV=3	0	0	0	0	0	0	1	0	0	0	0	0	0	0	0	0
sp|P29341|PABP1_MOUSE	Pabpc1	Polyadenylate-binding protein 1 OS=Mus musculus GN=Pabpc1 PE=1 SV=2	0	2	0	0	0	3	0	0	0	0	0	0	0	0	0	0
sp|Q8K212|PACS1_MOUSE	Pacs1	Phosphofurin acidic cluster sorting protein 1 OS=Mus musculus GN=Pacs1 PE=1 SV=2	0	3	1	0	0	2	2	0	0	6	0	2	2	2	1	0
sp|Q61644|PACN1_MOUSE	Pacsin1	Protein kinase C and casein kinase substrate in neurons protein 1 OS=Mus musculus GN=Pacsin1 PE=1 SV=1	0	21	2	5	0	15	3	3	2	0	2	3	1	4	2	6
sp|Q08642|PADI2_MOUSE	Padi2	Protein-arginine deiminase type-2 OS=Mus musculus GN=Padi2 PE=1 SV=2	2	0	2	0	0	1	0	4	1	1	2	2	1	0	0	2
sp|P63005|LIS1_MOUSE	Pafah1b1	Platelet-activating factor acetylhydrolase IB subunit alpha OS=Mus musculus GN=Pafah1b1 PE=1 SV=2	2	2	9	7	2	8	8	6	6	4	5	7	9	22	6	7
sp|Q61206|PA1B2_MOUSE	Pafah1b2	Platelet-activating factor acetylhydrolase IB subunit beta OS=Mus musculus GN=Pafah1b2 PE=1 SV=2	0	3	0	0	0	0	0	1	1	0	0	0	0	0	2	2
sp|Q61205|PA1B3_MOUSE	Pafah1b3	Platelet-activating factor acetylhydrolase IB subunit gamma OS=Mus musculus GN=Pafah1b3 PE=1 SV=1	0	0	0	0	0	1	0	0	0	0	0	0	0	0	0	0
sp|Q9DCL9|PUR6_MOUSE	Paics	Multifunctional protein ADE2 OS=Mus musculus GN=Paics PE=1 SV=4	0	0	0	0	0	2	0	0	0	0	0	0	1	0	0	0
sp|O88643|PAK1_MOUSE	Pak1	Serine/threonine-protein kinase PAK 1 OS=Mus musculus GN=Pak1 PE=1 SV=1	0	3	0	0	0	6	0	0	0	0	0	0	0	0	0	0
sp|Q8CIN4|PAK2_MOUSE	Pak2	Serine/threonine-protein kinase PAK 2 OS=Mus musculus GN=Pak2 PE=1 SV=1	0	0	0	0	0	4	0	0	0	0	0	0	0	0	0	0
sp|Q61036|PAK3_MOUSE	Pak3	Serine/threonine-protein kinase PAK 3 OS=Mus musculus GN=Pak3 PE=1 SV=2	0	0	0	0	0	1	0	0	0	0	0	0	0	0	0	0
sp|Q8C015|PAK5_MOUSE	Pak5	Serine/threonine-protein kinase PAK 5 OS=Mus musculus GN=Pak5 PE=1 SV=1	0	0	1	0	0	0	1	0	1	0	0	0	3	0	0	0
sp|Q9Z0P4|PALM_MOUSE	Palm	Paralemmin-1 OS=Mus musculus GN=Palm PE=1 SV=1	6	8	3	6	3	19	4	3	7	6	2	3	2	1	6	4
sp|Q8BR92|PALM2_MOUSE	Palm2	Paralemmin-2 OS=Mus musculus GN=Palm2 PE=1 SV=1	0	0	0	0	0	2	0	0	0	0	0	0	0	0	0	0
sp|Q68ED3|PAPD5_MOUSE	Papd5	Non-canonical poly(A) RNA polymerase PAPD5 OS=Mus musculus GN=Papd5 PE=1 SV=2	10	1	0	1	14	21	0	0	7	0	0	1	14	20	0	2
sp|Q9EPX2|PPN_MOUSE	Papln	Papilin OS=Mus musculus GN=Papln PE=2 SV=2	0	0	0	0	0	0	0	1	0	0	0	0	0	0	0	0
sp|Q99LX0|PARK7_MOUSE	Park7	Protein DJ-1 OS=Mus musculus GN=Park7 PE=1 SV=1	4	12	1	5	0	11	4	3	4	0	0	1	4	0	3	2
sp|Q8BSQ9|PB1_MOUSE	Pbrm1	Protein polybromo-1 OS=Mus musculus GN=Pbrm1 PE=1 SV=4	0	0	0	0	0	0	0	0	0	0	0	0	0	1	0	0
sp|Q05920|PYC_MOUSE	Pc	Pyruvate carboxylase, mitochondrial OS=Mus musculus GN=Pc PE=1 SV=1	1447	1098	703	753	1079	1344	655	694	1614	1385	627	683	1985	1958	632	651
sp|P60335|PCBP1_MOUSE	Pcbp1	Poly(rC)-binding protein 1 OS=Mus musculus GN=Pcbp1 PE=1 SV=1	0	0	0	1	0	1	0	0	0	0	1	0	0	0	1	1
sp|Q61990|PCBP2_MOUSE	Pcbp2	Poly(rC)-binding protein 2 OS=Mus musculus GN=Pcbp2 PE=1 SV=1	0	1	1	1	0	0	1	1	0	0	1	1	0	0	1	2
sp|P57722|PCBP3_MOUSE	Pcbp3	Poly(rC)-binding protein 3 OS=Mus musculus GN=Pcbp3 PE=1 SV=3	1	3	2	2	0	3	2	0	0	0	2	0	0	0	1	0
sp|Q91ZA3|PCCA_MOUSE	Pcca	Propionyl-CoA carboxylase alpha chain, mitochondrial OS=Mus musculus GN=Pcca PE=1 SV=2	1567	885	436	456	888	933	595	335	1259	1216	529	456	2134	2151	420	392
sp|Q99MN9|PCCB_MOUSE	Pccb	Propionyl-CoA carboxylase beta chain, mitochondrial OS=Mus musculus GN=Pccb PE=1 SV=2	17	9	23	29	12	16	36	17	18	23	24	23	23	23	23	21
tr|Q8CFX3|Q8CFX3_MOUSE	Pcdh1	Protocadherin 1 OS=Mus musculus GN=Pcdh1 PE=1 SV=1	0	2	0	0	0	12	0	0	0	0	0	0	0	1	0	0
tr|A0A0A6YWM0|A0A0A6YWM0_MOUSE	Pcdh9	Protocadherin 9 (Fragment) OS=Mus musculus GN=Pcdh9 PE=1 SV=1	0	0	0	0	0	2	0	0	0	0	0	0	0	0	0	0
sp|Q8BH04|PCKGM_MOUSE	Pck2	Phosphoenolpyruvate carboxykinase [GTP], mitochondrial OS=Mus musculus GN=Pck2 PE=1 SV=1	0	1	0	0	0	0	0	0	0	0	0	0	0	0	0	0
sp|Q9QYX7|PCLO_MOUSE	Pclo	Protein piccolo OS=Mus musculus GN=Pclo PE=1 SV=4	0	7	8	7	1	7	4	4	0	3	14	10	0	3	8	7
sp|P23506|PIMT_MOUSE	Pcmt1	Protein-L-isoaspartate(D-aspartate) O-methyltransferase OS=Mus musculus GN=Pcmt1 PE=1 SV=3	0	0	0	0	0	3	0	0	0	0	0	0	0	2	0	0
sp|P63054|PCP4_MOUSE	Pcp4	Purkinje cell protein 4 OS=Mus musculus GN=Pcp4 PE=3 SV=2	0	2	0	1	0	29	1	0	0	0	0	1	0	0	0	0
sp|Q6W8Q3|PC4L1_MOUSE	Pcp4l1	Purkinje cell protein 4-like protein 1 OS=Mus musculus GN=Pcp4l1 PE=1 SV=1	0	0	0	0	1	4	1	0	0	0	0	0	0	0	0	0
sp|Q9QXV0|PCSK1_MOUSE	Pcsk1n	ProSAAS OS=Mus musculus GN=Pcsk1n PE=1 SV=2	0	0	0	0	0	8	2	0	0	0	0	0	0	0	0	0
tr|Q3UFS6|Q3UFS6_MOUSE	Pcx	Pyruvate carboxylase OS=Mus musculus GN=Pcx PE=2 SV=1	2	0	1	0	4	3	0	0	0	0	0	0	3	0	0	1
sp|Q8C7K6|PCYXL_MOUSE	Pcyox1l	Prenylcysteine oxidase-like OS=Mus musculus GN=Pcyox1l PE=1 SV=1	0	0	0	0	0	0	0	0	0	0	0	0	0	0	1	0
sp|Q3UHX2|HAP28_MOUSE	Pdap1	28 kDa heat- and acid-stable phosphoprotein OS=Mus musculus GN=Pdap1 PE=1 SV=1	0	0	0	0	0	0	0	0	0	2	0	0	0	0	0	0
sp|Q8VE70|PDC10_MOUSE	Pdcd10	Programmed cell death protein 10 OS=Mus musculus GN=Pdcd10 PE=1 SV=1	0	0	0	0	0	1	0	0	0	0	0	0	0	0	0	0
sp|P12815|PDCD6_MOUSE	Pdcd6	Programmed cell death protein 6 OS=Mus musculus GN=Pdcd6 PE=1 SV=2	0	0	0	0	0	1	0	0	0	0	0	0	0	0	0	0
sp|Q9WU78|PDC6I_MOUSE	Pdcd6ip	Programmed cell death 6-interacting protein OS=Mus musculus GN=Pdcd6ip PE=1 SV=3	0	0	0	0	0	0	0	0	1	0	0	0	0	0	0	0
sp|Q8CA95|PDE10_MOUSE	Pde10a	cAMP and cAMP-inhibited cGMP 3',5'-cyclic phosphodiesterase 10A OS=Mus musculus GN=Pde10a PE=1 SV=2	3	10	6	8	2	4	2	9	3	0	5	2	2	0	8	4
sp|Q61481|PDE1A_MOUSE	Pde1a	Calcium/calmodulin-dependent 3',5'-cyclic nucleotide phosphodiesterase 1A OS=Mus musculus GN=Pde1a PE=1 SV=2	0	1	3	2	1	4	0	4	0	0	1	3	0	0	2	2
sp|Q01065|PDE1B_MOUSE	Pde1b	Calcium/calmodulin-dependent 3',5'-cyclic nucleotide phosphodiesterase 1B OS=Mus musculus GN=Pde1b PE=1 SV=2	0	0	5	6	2	4	2	5	4	2	5	5	0	5	6	8
sp|Q922S4|PDE2A_MOUSE	Pde2a	cGMP-dependent 3',5'-cyclic phosphodiesterase OS=Mus musculus GN=Pde2a PE=1 SV=3	0	0	6	5	0	0	3	5	0	0	2	2	0	0	6	5
sp|Q01063|PDE4D_MOUSE	Pde4d	cAMP-specific 3',5'-cyclic phosphodiesterase 4D OS=Mus musculus GN=Pde4d PE=1 SV=2	0	0	0	1	0	0	0	0	0	0	0	0	0	0	0	0
sp|P35486|ODPA_MOUSE	Pdha1	Pyruvate dehydrogenase E1 component subunit alpha, somatic form, mitochondrial OS=Mus musculus GN=Pdha1 PE=1 SV=1	3	4	2	2	0	9	2	4	0	2	2	3	2	3	0	4
sp|Q9D051|ODPB_MOUSE	Pdhb	Pyruvate dehydrogenase E1 component subunit beta, mitochondrial OS=Mus musculus GN=Pdhb PE=1 SV=1	1	9	4	6	2	11	5	15	5	4	3	4	0	0	10	10
sp|Q8BKZ9|ODPX_MOUSE	Pdhx	Pyruvate dehydrogenase protein X component, mitochondrial OS=Mus musculus GN=Pdhx PE=1 SV=1	0	0	0	0	0	2	0	0	0	0	0	0	0	0	0	0
sp|P27773|PDIA3_MOUSE	Pdia3	Protein disulfide-isomerase A3 OS=Mus musculus GN=Pdia3 PE=1 SV=2	0	5	0	0	0	9	1	0	0	0	0	0	0	0	0	0
sp|Q922R8|PDIA6_MOUSE	Pdia6	Protein disulfide-isomerase A6 OS=Mus musculus GN=Pdia6 PE=1 SV=3	0	0	0	0	0	2	0	0	0	0	0	0	0	0	0	0
sp|Q922H2|PDK3_MOUSE	Pdk3	[Pyruvate dehydrogenase (acetyl-transferring)] kinase isozyme 3, mitochondrial OS=Mus musculus GN=Pdk3 PE=1 SV=1	0	0	0	0	0	4	0	0	0	0	0	0	0	0	0	0
sp|Q9Z2A0|PDPK1_MOUSE	Pdpk1	3-phosphoinositide-dependent protein kinase 1 OS=Mus musculus GN=Pdpk1 PE=1 SV=2	0	0	0	0	0	4	0	0	0	0	0	0	0	0	0	0
sp|Q7TSQ8|PDPR_MOUSE	Pdpr	Pyruvate dehydrogenase phosphatase regulatory subunit, mitochondrial OS=Mus musculus GN=Pdpr PE=1 SV=1	0	0	0	0	0	1	0	0	0	0	0	0	0	0	0	0
sp|Q8K183|PDXK_MOUSE	Pdxk	Pyridoxal kinase OS=Mus musculus GN=Pdxk PE=1 SV=1	2	3	5	3	2	6	3	3	12	6	6	3	3	3	6	3
sp|P60487|PLPP_MOUSE	Pdxp	Pyridoxal phosphate phosphatase OS=Mus musculus GN=Pdxp PE=1 SV=1	0	4	0	1	0	2	1	2	0	0	0	0	0	0	0	1
sp|P70296|PEBP1_MOUSE	Pebp1	Phosphatidylethanolamine-binding protein 1 OS=Mus musculus GN=Pebp1 PE=1 SV=3	10	10	6	11	13	19	8	8	5	7	5	12	6	14	6	6
sp|Q8C437|PEX5R_MOUSE	Pex5l	PEX5-related protein OS=Mus musculus GN=Pex5l PE=1 SV=2	0	0	0	0	0	2	0	0	0	0	0	0	0	0	0	0
sp|O70591|PFD2_MOUSE	Pfdn2	Prefoldin subunit 2 OS=Mus musculus GN=Pfdn2 PE=1 SV=2	0	0	0	0	0	2	0	0	0	0	0	0	0	0	0	0
sp|Q9WU28|PFD5_MOUSE	Pfdn5	Prefoldin subunit 5 OS=Mus musculus GN=Pfdn5 PE=1 SV=1	0	1	0	0	0	1	0	0	0	0	0	0	0	0	0	0
sp|P12382|PFKAL_MOUSE	Pfkl	ATP-dependent 6-phosphofructokinase, liver type OS=Mus musculus GN=Pfkl PE=1 SV=4	2	0	6	3	0	8	4	4	2	1	5	4	3	1	2	5
sp|P47857|PFKAM_MOUSE	Pfkm	ATP-dependent 6-phosphofructokinase, muscle type OS=Mus musculus GN=Pfkm PE=1 SV=3	7	10	25	19	6	21	19	17	20	6	16	21	7	12	19	14
sp|Q9WUA3|PFKAP_MOUSE	Pfkp	ATP-dependent 6-phosphofructokinase, platelet type OS=Mus musculus GN=Pfkp PE=1 SV=1	8	7	11	14	7	9	7	10	5	8	13	10	12	10	13	9
sp|P62962|PROF1_MOUSE	Pfn1	Profilin-1 OS=Mus musculus GN=Pfn1 PE=1 SV=2	10	16	10	10	5	13	10	11	7	12	9	9	7	2	7	14
sp|Q9JJV2|PROF2_MOUSE	Pfn2	Profilin-2 OS=Mus musculus GN=Pfn2 PE=1 SV=3	0	1	2	2	0	4	1	3	1	1	2	3	0	0	2	5
sp|Q9DBJ1|PGAM1_MOUSE	Pgam1	Phosphoglycerate mutase 1 OS=Mus musculus GN=Pgam1 PE=1 SV=3	1	2	3	7	4	7	0	3	10	0	0	4	4	4	5	7
sp|O70250|PGAM2_MOUSE	Pgam2	Phosphoglycerate mutase 2 OS=Mus musculus GN=Pgam2 PE=1 SV=3	1	7	2	4	1	9	2	2	1	3	3	2	3	3	2	0
tr|D3Z077|D3Z077_MOUSE	Pgbd5	PiggyBac transposable element-derived 5 OS=Mus musculus GN=Pgbd5 PE=1 SV=2	0	0	0	0	0	0	0	0	0	0	0	0	0	1	0	0
sp|Q9DCD0|6PGD_MOUSE	Pgd	6-phosphogluconate dehydrogenase, decarboxylating OS=Mus musculus GN=Pgd PE=1 SV=3	0	5	5	4	0	2	3	6	0	0	1	0	1	0	2	2
sp|P09411|PGK1_MOUSE	Pgk1	Phosphoglycerate kinase 1 OS=Mus musculus GN=Pgk1 PE=1 SV=4	6	55	12	18	7	41	19	15	11	12	16	13	6	8	13	17
sp|Q9D0F9|PGM1_MOUSE	Pgm1	Phosphoglucomutase-1 OS=Mus musculus GN=Pgm1 PE=1 SV=4	0	8	3	3	0	4	3	1	1	0	2	3	0	0	3	3
sp|Q8CAA7|PGM2L_MOUSE	Pgm2l1	Glucose 1,6-bisphosphate synthase OS=Mus musculus GN=Pgm2l1 PE=1 SV=1	1	2	5	3	0	2	1	2	5	2	3	1	2	3	1	3
sp|Q9CYR6|AGM1_MOUSE	Pgm3	Phosphoacetylglucosamine mutase OS=Mus musculus GN=Pgm3 PE=1 SV=1	0	1	0	1	0	2	1	0	2	1	1	0	0	0	0	1
sp|Q8CHP8|PGP_MOUSE	Pgp	Glycerol-3-phosphate phosphatase OS=Mus musculus GN=Pgp PE=1 SV=1	0	1	0	0	0	2	0	0	0	0	0	0	0	0	0	0
sp|O55022|PGRC1_MOUSE	Pgrmc1	Membrane-associated progesterone receptor component 1 OS=Mus musculus GN=Pgrmc1 PE=1 SV=4	0	0	0	0	0	3	0	0	0	2	0	0	0	0	0	0
sp|Q8BHF7|PGPS1_MOUSE	Pgs1	CDP-diacylglycerol--glycerol-3-phosphate 3-phosphatidyltransferase, mitochondrial OS=Mus musculus GN=Pgs1 PE=1 SV=1	0	0	0	0	0	0	0	0	1	0	0	0	0	0	0	1
sp|Q2M3X8|PHAR1_MOUSE	Phactr1	Phosphatase and actin regulator 1 OS=Mus musculus GN=Phactr1 PE=1 SV=1	0	0	0	0	0	2	0	0	0	0	0	0	0	0	0	0
sp|P67778|PHB_MOUSE	Phb	Prohibitin OS=Mus musculus GN=Phb PE=1 SV=1	0	3	2	4	0	7	2	3	0	0	0	3	0	0	0	1
sp|O35129|PHB2_MOUSE	Phb2	Prohibitin-2 OS=Mus musculus GN=Phb2 PE=1 SV=1	0	2	3	1	0	6	1	3	0	0	0	1	0	0	1	0
sp|Q80TL4|PHF24_MOUSE	Phf24	PHD finger protein 24 OS=Mus musculus GN=Phf24 PE=1 SV=2	0	1	0	0	0	4	2	0	0	0	0	0	0	0	0	3
sp|Q61753|SERA_MOUSE	Phgdh	D-3-phosphoglycerate dehydrogenase OS=Mus musculus GN=Phgdh PE=1 SV=3	0	3	3	4	0	3	2	1	1	0	1	3	1	0	3	3
sp|Q8K0S0|PHYIP_MOUSE	Phyhip	Phytanoyl-CoA hydroxylase-interacting protein OS=Mus musculus GN=Phyhip PE=1 SV=1	2	1	3	5	0	2	4	4	1	0	2	0	0	3	6	4
sp|Q8BGT8|PHIPL_MOUSE	Phyhipl	Phytanoyl-CoA hydroxylase-interacting protein-like OS=Mus musculus GN=Phyhipl PE=1 SV=1	2	2	7	8	2	3	3	8	1	3	8	6	4	2	5	6
sp|E9Q3L2|PI4KA_MOUSE	Pi4ka	Phosphatidylinositol 4-kinase alpha OS=Mus musculus GN=Pi4ka PE=1 SV=2	0	0	1	6	0	4	1	4	0	0	0	1	0	0	5	2
sp|Q7M6Y3|PICAL_MOUSE	Picalm	Phosphatidylinositol-binding clathrin assembly protein OS=Mus musculus GN=Picalm PE=1 SV=1	0	0	1	0	0	0	0	0	0	0	0	0	0	0	0	0
sp|O70172|PI42A_MOUSE	Pip4k2a	Phosphatidylinositol 5-phosphate 4-kinase type-2 alpha OS=Mus musculus GN=Pip4k2a PE=1 SV=1	0	1	1	1	0	1	0	1	0	0	0	1	0	0	0	1
sp|Q80XI4|PI42B_MOUSE	Pip4k2b	Phosphatidylinositol 5-phosphate 4-kinase type-2 beta OS=Mus musculus GN=Pip4k2b PE=1 SV=1	2	4	4	7	0	9	0	5	7	0	3	1	5	0	4	4
sp|O70161|PI51C_MOUSE	Pip5k1c	Phosphatidylinositol 4-phosphate 5-kinase type-1 gamma OS=Mus musculus GN=Pip5k1c PE=1 SV=2	0	0	0	2	0	1	0	3	0	0	0	0	0	0	0	1
sp|Q8BWR2|PITH1_MOUSE	Pithd1	PITH domain-containing protein 1 OS=Mus musculus GN=Pithd1 PE=1 SV=1	0	2	0	0	0	0	1	1	1	0	0	0	0	0	1	1
sp|P53810|PIPNA_MOUSE	Pitpna	Phosphatidylinositol transfer protein alpha isoform OS=Mus musculus GN=Pitpna PE=1 SV=2	2	2	0	3	1	6	2	3	0	0	2	0	0	0	2	3
sp|Q8K4R4|PITC1_MOUSE	Pitpnc1	Cytoplasmic phosphatidylinositol transfer protein 1 OS=Mus musculus GN=Pitpnc1 PE=1 SV=1	0	0	0	0	0	1	0	2	0	0	0	1	0	0	1	1
sp|O35954|PITM1_MOUSE	Pitpnm1	Membrane-associated phosphatidylinositol transfer protein 1 OS=Mus musculus GN=Pitpnm1 PE=1 SV=1	0	0	0	0	0	0	0	0	0	0	0	0	0	0	2	0
sp|Q6ZPQ6|PITM2_MOUSE	Pitpnm2	Membrane-associated phosphatidylinositol transfer protein 2 OS=Mus musculus GN=Pitpnm2 PE=1 SV=2	0	2	0	1	0	0	0	1	0	0	0	0	0	0	1	0
sp|P53657|KPYR_MOUSE	Pklr	Pyruvate kinase PKLR OS=Mus musculus GN=Pklr PE=1 SV=1	2	1	1	1	3	4	1	1	1	1	1	0	3	1	0	1
sp|P52480|KPYM_MOUSE	Pkm	Pyruvate kinase PKM OS=Mus musculus GN=Pkm PE=1 SV=4	30	63	47	37	33	40	36	45	31	21	43	36	44	27	38	38
sp|P27612|PLAP_MOUSE	Plaa	Phospholipase A-2-activating protein OS=Mus musculus GN=Plaa PE=1 SV=4	0	0	1	1	1	4	1	3	0	0	1	1	0	0	1	1
sp|Q9Z1B3|PLCB1_MOUSE	Plcb1	1-phosphatidylinositol 4,5-bisphosphate phosphodiesterase beta-1 OS=Mus musculus GN=Plcb1 PE=1 SV=2	2	11	11	10	1	5	4	17	5	0	7	5	5	1	9	9
sp|Q8K394|PLCL2_MOUSE	Plcl2	Inactive phospholipase C-like protein 2 OS=Mus musculus GN=Plcl2 PE=1 SV=2	0	0	1	1	0	0	1	1	0	0	0	0	0	0	0	0
tr|Q3UWT7|Q3UWT7_MOUSE	Pld1	Putative uncharacterized protein (Fragment) OS=Mus musculus GN=Pld1 PE=2 SV=1	0	0	0	0	0	0	0	0	0	0	0	1	0	0	0	0
sp|O35405|PLD3_MOUSE	Pld3	Phospholipase D3 OS=Mus musculus GN=Pld3 PE=1 SV=1	0	0	1	0	0	0	1	0	0	0	0	0	0	0	0	0
sp|Q9QXS1|PLEC_MOUSE	Plec	Plectin OS=Mus musculus GN=Plec PE=1 SV=3	2	0	7	5	0	8	4	0	5	3	4	4	2	0	4	4
sp|P20918|PLMN_MOUSE	Plg	Plasminogen OS=Mus musculus GN=Plg PE=1 SV=3	1	0	1	0	1	1	1	1	2	0	1	1	1	0	0	0
sp|Q9DCU2|PLLP_MOUSE	Pllp	Plasmolipin OS=Mus musculus GN=Pllp PE=1 SV=1	1	0	3	2	0	0	4	3	1	2	2	4	0	0	2	4
sp|P60202|MYPR_MOUSE	Plp1	Myelin proteolipid protein OS=Mus musculus GN=Plp1 PE=1 SV=2	13	22	21	29	13	31	15	25	17	40	19	21	24	38	22	24
sp|Q99JY8|PLPP3_MOUSE	Plpp3	Phospholipid phosphatase 3 OS=Mus musculus GN=Plpp3 PE=1 SV=1	0	0	2	1	0	3	1	3	3	4	0	2	0	4	0	1
sp|Q7TME0|PLPR4_MOUSE	Plppr4	Phospholipid phosphatase-related protein type 4 OS=Mus musculus GN=Plppr4 PE=1 SV=2	0	0	0	1	0	0	0	0	1	0	0	0	0	0	0	0
sp|Q99K51|PLST_MOUSE	Pls3	Plastin-3 OS=Mus musculus GN=Pls3 PE=1 SV=3	0	0	0	0	0	1	0	0	0	0	0	0	0	0	0	0
sp|Q9DC11|PXDC2_MOUSE	Plxdc2	Plexin domain-containing protein 2 OS=Mus musculus GN=Plxdc2 PE=1 SV=1	16	16	12	5	9	7	12	11	8	11	10	8	10	21	7	9
sp|P70206|PLXA1_MOUSE	Plxna1	Plexin-A1 OS=Mus musculus GN=Plxna1 PE=1 SV=1	0	0	2	1	0	0	2	4	0	0	1	1	0	0	2	1
sp|Q80UG2|PLXA4_MOUSE	Plxna4	Plexin-A4 OS=Mus musculus GN=Plxna4 PE=1 SV=3	0	1	1	1	0	0	0	1	0	0	0	0	0	0	0	2
sp|P23492|PNPH_MOUSE	Pnp	Purine nucleoside phosphorylase OS=Mus musculus GN=Pnp PE=1 SV=2	0	1	0	3	0	2	0	0	0	0	3	0	0	0	3	0
sp|Q8CGS6|DPOLQ_MOUSE	Polq	DNA polymerase theta OS=Mus musculus GN=Polq PE=1 SV=2	0	0	0	0	0	0	0	0	0	0	0	0	0	0	1	0
sp|P52430|PON1_MOUSE	Pon1	Serum paraoxonase/arylesterase 1 OS=Mus musculus GN=Pon1 PE=1 SV=2	1	0	0	0	0	0	0	0	0	0	0	0	0	0	0	0
sp|Q62086|PON2_MOUSE	Pon2	Serum paraoxonase/arylesterase 2 OS=Mus musculus GN=Pon2 PE=1 SV=2	0	0	0	0	0	0	0	0	0	0	0	0	0	0	1	0
sp|Q9D819|IPYR_MOUSE	Ppa1	Inorganic pyrophosphatase OS=Mus musculus GN=Ppa1 PE=1 SV=1	0	0	0	1	0	15	1	0	0	0	0	0	0	1	0	0
sp|P60469|LIPA3_MOUSE	Ppfia3	Liprin-alpha-3 OS=Mus musculus GN=Ppfia3 PE=1 SV=2	0	0	0	0	0	2	0	0	0	0	0	0	1	0	0	0
sp|P17742|PPIA_MOUSE	Ppia	Peptidyl-prolyl cis-trans isomerase A OS=Mus musculus GN=Ppia PE=1 SV=2	18	25	8	8	19	32	14	8	17	9	7	4	16	3	7	10
sp|P24369|PPIB_MOUSE	Ppib	Peptidyl-prolyl cis-trans isomerase B OS=Mus musculus GN=Ppib PE=1 SV=2	0	3	0	0	0	4	0	0	0	0	0	0	0	0	0	0
sp|Q9CR16|PPID_MOUSE	Ppid	Peptidyl-prolyl cis-trans isomerase D OS=Mus musculus GN=Ppid PE=1 SV=3	0	0	0	0	0	1	0	0	0	0	0	0	0	0	0	0
sp|P36993|PPM1B_MOUSE	Ppm1b	Protein phosphatase 1B OS=Mus musculus GN=Ppm1b PE=1 SV=1	0	0	0	0	0	1	0	0	0	0	0	0	0	0	0	0
sp|Q80TL0|PPM1E_MOUSE	Ppm1e	Protein phosphatase 1E OS=Mus musculus GN=Ppm1e PE=1 SV=2	0	1	2	2	1	0	1	2	3	2	1	1	0	0	1	1
sp|Q8CGA0|PPM1F_MOUSE	Ppm1f	Protein phosphatase 1F OS=Mus musculus GN=Ppm1f PE=1 SV=1	0	0	1	0	0	0	0	0	0	0	0	0	0	0	0	0
sp|Q8BVQ5|PPME1_MOUSE	Ppme1	Protein phosphatase methylesterase 1 OS=Mus musculus GN=Ppme1 PE=1 SV=5	0	1	4	3	0	4	1	4	1	1	1	0	0	2	3	0
sp|P51175|PPOX_MOUSE	Ppox	Protoporphyrinogen oxidase OS=Mus musculus GN=Ppox PE=1 SV=1	0	0	0	0	0	0	0	0	0	0	0	0	1	0	0	0
sp|P62137|PP1A_MOUSE	Ppp1ca	Serine/threonine-protein phosphatase PP1-alpha catalytic subunit OS=Mus musculus GN=Ppp1ca PE=1 SV=1	0	0	0	0	0	0	0	1	0	0	0	0	0	0	0	1
sp|P62141|PP1B_MOUSE	Ppp1cb	Serine/threonine-protein phosphatase PP1-beta catalytic subunit OS=Mus musculus GN=Ppp1cb PE=1 SV=3	0	0	0	0	0	0	0	0	0	0	0	0	0	0	1	0
sp|P63087|PP1G_MOUSE	Ppp1cc	Serine/threonine-protein phosphatase PP1-gamma catalytic subunit OS=Mus musculus GN=Ppp1cc PE=1 SV=1	0	0	0	0	0	2	0	0	0	1	0	0	0	0	0	0
sp|Q9DBR7|MYPT1_MOUSE	Ppp1r12a	Protein phosphatase 1 regulatory subunit 12A OS=Mus musculus GN=Ppp1r12a PE=1 SV=2	0	0	0	0	0	1	0	0	0	0	0	0	0	0	0	0
sp|Q62415|ASPP1_MOUSE	Ppp1r13b	Apoptosis-stimulating of p53 protein 1 OS=Mus musculus GN=Ppp1r13b PE=1 SV=2	0	0	0	0	0	1	0	0	0	0	0	0	0	0	0	0
sp|Q60829|PPR1B_MOUSE	Ppp1r1b	Protein phosphatase 1 regulatory subunit 1B OS=Mus musculus GN=Ppp1r1b PE=1 SV=2	8	16	8	5	3	15	8	3	7	4	7	5	9	10	5	3
sp|Q3UM45|PP1R7_MOUSE	Ppp1r7	Protein phosphatase 1 regulatory subunit 7 OS=Mus musculus GN=Ppp1r7 PE=1 SV=2	0	1	0	0	0	5	0	0	0	0	0	0	0	0	0	0
tr|H3BJD6|H3BJD6_MOUSE	Ppp1r9a	Protein phosphatase 1, regulatory (inhibitor) subunit 9A OS=Mus musculus GN=Ppp1r9a PE=1 SV=1	0	4	0	1	0	4	0	0	0	0	0	0	0	0	0	0
sp|Q6R891|NEB2_MOUSE	Ppp1r9b	Neurabin-2 OS=Mus musculus GN=Ppp1r9b PE=1 SV=1	0	0	0	0	0	3	0	0	0	0	0	0	0	0	0	0
sp|P63330|PP2AA_MOUSE	Ppp2ca	Serine/threonine-protein phosphatase 2A catalytic subunit alpha isoform OS=Mus musculus GN=Ppp2ca PE=1 SV=1	0	8	5	5	0	4	2	8	4	0	0	4	2	0	4	3
sp|Q76MZ3|2AAA_MOUSE	Ppp2r1a	Serine/threonine-protein phosphatase 2A 65 kDa regulatory subunit A alpha isoform OS=Mus musculus GN=Ppp2r1a PE=1 SV=3	0	0	2	0	0	5	0	0	0	0	2	0	0	0	0	0
sp|Q6P1F6|2ABA_MOUSE	Ppp2r2a	Serine/threonine-protein phosphatase 2A 55 kDa regulatory subunit B alpha isoform OS=Mus musculus GN=Ppp2r2a PE=1 SV=1	1	3	2	2	0	4	2	5	1	0	4	1	3	0	4	4
sp|Q8BG02|2ABG_MOUSE	Ppp2r2c	Serine/threonine-protein phosphatase 2A 55 kDa regulatory subunit B gamma isoform OS=Mus musculus GN=Ppp2r2c PE=1 SV=1	0	0	1	1	0	4	0	1	0	0	0	1	0	0	2	1
sp|P63328|PP2BA_MOUSE	Ppp3ca	Serine/threonine-protein phosphatase 2B catalytic subunit alpha isoform OS=Mus musculus GN=Ppp3ca PE=1 SV=1	0	10	8	7	0	15	9	9	2	2	9	6	2	2	7	8
sp|P48453|PP2BB_MOUSE	Ppp3cb	Serine/threonine-protein phosphatase 2B catalytic subunit beta isoform OS=Mus musculus GN=Ppp3cb PE=1 SV=2	1	2	3	0	0	6	2	4	2	0	1	3	0	0	2	3
sp|P48455|PP2BC_MOUSE	Ppp3cc	Serine/threonine-protein phosphatase 2B catalytic subunit gamma isoform OS=Mus musculus GN=Ppp3cc PE=1 SV=1	0	2	5	5	2	1	2	3	1	2	2	3	0	0	5	4
sp|Q63810|CANB1_MOUSE	Ppp3r1	Calcineurin subunit B type 1 OS=Mus musculus GN=Ppp3r1 PE=1 SV=3	0	3	2	7	2	6	3	1	3	1	2	3	1	3	2	5
sp|Q6NVE9|PPTC7_MOUSE	Pptc7	Protein phosphatase PTC7 homolog OS=Mus musculus GN=Pptc7 PE=1 SV=1	0	0	0	0	0	1	0	0	0	0	0	0	0	0	0	0
sp|Q9JIG8|PRAF2_MOUSE	Praf2	PRA1 family protein 2 OS=Mus musculus GN=Praf2 PE=1 SV=1	0	1	1	1	0	2	0	1	2	0	1	1	2	1	1	1
sp|P35700|PRDX1_MOUSE	Prdx1	Peroxiredoxin-1 OS=Mus musculus GN=Prdx1 PE=1 SV=1	9	10	9	8	14	15	9	7	9	4	5	9	6	8	7	4
sp|Q61171|PRDX2_MOUSE	Prdx2	Peroxiredoxin-2 OS=Mus musculus GN=Prdx2 PE=1 SV=3	14	14	9	7	7	13	6	7	12	9	6	7	14	14	7	8
sp|P20108|PRDX3_MOUSE	Prdx3	Thioredoxin-dependent peroxide reductase, mitochondrial OS=Mus musculus GN=Prdx3 PE=1 SV=1	0	8	4	2	2	6	2	2	3	5	2	4	3	2	3	3
sp|O08807|PRDX4_MOUSE	Prdx4	Peroxiredoxin-4 OS=Mus musculus GN=Prdx4 PE=1 SV=1	0	5	2	2	0	0	2	3	2	2	0	2	0	0	1	2
sp|P99029|PRDX5_MOUSE	Prdx5	Peroxiredoxin-5, mitochondrial OS=Mus musculus GN=Prdx5 PE=1 SV=2	0	15	6	7	3	10	6	6	11	4	6	6	4	4	4	6
sp|O08709|PRDX6_MOUSE	Prdx6	Peroxiredoxin-6 OS=Mus musculus GN=Prdx6 PE=1 SV=3	4	19	3	5	0	22	7	3	2	3	6	3	11	5	4	8
sp|Q9WUQ2|PREB_MOUSE	Preb	Prolactin regulatory element-binding protein OS=Mus musculus GN=Preb PE=1 SV=1	0	0	0	0	0	0	0	0	0	1	0	0	0	0	0	1
sp|Q9QUR6|PPCE_MOUSE	Prep	Prolyl endopeptidase OS=Mus musculus GN=Prep PE=1 SV=1	0	4	2	2	0	1	0	1	1	2	4	1	0	1	6	1
sp|Q8C167|PPCEL_MOUSE	Prepl	Prolyl endopeptidase-like OS=Mus musculus GN=Prepl PE=1 SV=1	2	0	4	2	1	0	0	1	0	0	1	3	1	1	0	2
sp|P05132|KAPCA_MOUSE	Prkaca	cAMP-dependent protein kinase catalytic subunit alpha OS=Mus musculus GN=Prkaca PE=1 SV=3	4	8	9	12	3	9	0	9	5	3	6	7	5	3	7	10
sp|P68181|KAPCB_MOUSE	Prkacb	cAMP-dependent protein kinase catalytic subunit beta OS=Mus musculus GN=Prkacb PE=1 SV=2	6	4	5	6	6	2	4	3	1	0	2	2	4	4	4	4
sp|Q91WG5|AAKG2_MOUSE	Prkag2	5'-AMP-activated protein kinase subunit gamma-2 OS=Mus musculus GN=Prkag2 PE=1 SV=2	0	0	0	0	0	0	0	0	1	0	0	0	0	0	0	0
sp|P12367|KAP2_MOUSE	Prkar2a	cAMP-dependent protein kinase type II-alpha regulatory subunit OS=Mus musculus GN=Prkar2a PE=1 SV=2	0	1	2	1	0	4	0	0	0	0	0	0	0	0	0	0
sp|P31324|KAP3_MOUSE	Prkar2b	cAMP-dependent protein kinase type II-beta regulatory subunit OS=Mus musculus GN=Prkar2b PE=1 SV=3	0	1	1	2	0	3	2	1	2	0	1	0	1	2	1	4
tr|Q4VA93|Q4VA93_MOUSE	Prkca	Protein kinase C OS=Mus musculus GN=Prkca PE=1 SV=1	0	4	3	10	0	6	0	3	1	0	2	1	0	1	5	3
sp|P68404|KPCB_MOUSE	Prkcb	Protein kinase C beta type OS=Mus musculus GN=Prkcb PE=1 SV=4	3	4	9	12	3	13	7	12	8	7	10	12	6	9	11	15
sp|P28867|KPCD_MOUSE	Prkcd	Protein kinase C delta type OS=Mus musculus GN=Prkcd PE=1 SV=3	0	0	3	4	0	0	0	0	0	0	0	3	0	0	4	2
sp|P16054|KPCE_MOUSE	Prkce	Protein kinase C epsilon type OS=Mus musculus GN=Prkce PE=1 SV=1	0	0	3	5	0	0	0	6	2	1	3	2	1	0	5	4
sp|P63318|KPCG_MOUSE	Prkcg	Protein kinase C gamma type OS=Mus musculus GN=Prkcg PE=1 SV=1	5	5	9	12	0	7	5	10	12	6	5	8	13	0	13	10
sp|O08795|GLU2B_MOUSE	Prkcsh	Glucosidase 2 subunit beta OS=Mus musculus GN=Prkcsh PE=1 SV=1	0	0	0	0	0	1	1	0	0	0	0	0	0	0	0	0
sp|Q9JIF0|ANM1_MOUSE	Prmt1	Protein arginine N-methyltransferase 1 OS=Mus musculus GN=Prmt1 PE=1 SV=1	0	0	3	0	0	0	0	2	0	0	2	0	3	0	2	1
sp|Q8CIG8|ANM5_MOUSE	Prmt5	Protein arginine N-methyltransferase 5 OS=Mus musculus GN=Prmt5 PE=1 SV=3	0	0	0	2	0	0	1	1	0	0	1	1	0	0	2	0
sp|P04925|PRIO_MOUSE	Prnp	Major prion protein OS=Mus musculus GN=Prnp PE=1 SV=2	0	0	0	0	0	2	0	0	0	0	0	0	0	0	0	0
sp|Q9WU79|PROD_MOUSE	Prodh	Proline dehydrogenase 1, mitochondrial OS=Mus musculus GN=Prodh PE=1 SV=2	0	1	0	0	0	1	0	0	0	0	0	0	0	0	0	0
sp|Q9Z2Y8|PLPHP_MOUSE	Prosc	Pyridoxal phosphate homeostasis protein OS=Mus musculus GN=Prosc PE=1 SV=1	0	0	0	0	0	1	0	0	1	0	0	0	0	0	0	0
sp|Q8R574|KPRB_MOUSE	Prpsap2	Phosphoribosyl pyrophosphate synthase-associated protein 2 OS=Mus musculus GN=Prpsap2 PE=1 SV=1	0	0	0	2	0	0	0	0	0	0	0	0	0	0	0	2
sp|O35449|PRRT1_MOUSE	Prrt1	Proline-rich transmembrane protein 1 OS=Mus musculus GN=Prrt1 PE=1 SV=1	0	0	1	2	0	1	1	0	0	2	1	0	0	0	1	1
sp|E9PUL5|PRRT2_MOUSE	Prrt2	Proline-rich transmembrane protein 2 OS=Mus musculus GN=Prrt2 PE=1 SV=1	6	6	4	5	6	7	3	4	0	3	3	4	2	3	3	2
sp|Q6PE13|PRRT3_MOUSE	Prrt3	Proline-rich transmembrane protein 3 OS=Mus musculus GN=Prrt3 PE=1 SV=1	0	0	5	3	1	2	0	0	2	0	3	2	0	1	0	0
sp|Q99K85|SERC_MOUSE	Psat1	Phosphoserine aminotransferase OS=Mus musculus GN=Psat1 PE=1 SV=1	0	5	6	5	1	6	2	5	3	0	2	2	1	5	3	6
sp|Q2PFD7|PSD3_MOUSE	Psd3	PH and SEC7 domain-containing protein 3 OS=Mus musculus GN=Psd3 PE=1 SV=2	0	0	1	0	0	1	0	1	0	0	0	0	0	0	0	1
sp|Q99JF8|PSIP1_MOUSE	Psip1	PC4 and SFRS1-interacting protein OS=Mus musculus GN=Psip1 PE=1 SV=1	0	0	0	2	0	1	0	0	0	0	0	0	0	0	0	0
sp|Q9R1P4|PSA1_MOUSE	Psma1	Proteasome subunit alpha type-1 OS=Mus musculus GN=Psma1 PE=1 SV=1	0	4	0	0	0	3	0	0	0	0	0	0	0	0	0	0
sp|P49722|PSA2_MOUSE	Psma2	Proteasome subunit alpha type-2 OS=Mus musculus GN=Psma2 PE=1 SV=3	0	0	0	0	0	4	0	0	0	0	0	0	0	0	0	1
sp|O70435|PSA3_MOUSE	Psma3	Proteasome subunit alpha type-3 OS=Mus musculus GN=Psma3 PE=1 SV=3	0	2	0	1	0	3	0	0	0	0	0	0	0	0	0	1
sp|Q9R1P0|PSA4_MOUSE	Psma4	Proteasome subunit alpha type-4 OS=Mus musculus GN=Psma4 PE=1 SV=1	0	0	3	2	0	1	2	3	0	0	1	0	0	0	0	2
sp|Q9Z2U1|PSA5_MOUSE	Psma5	Proteasome subunit alpha type-5 OS=Mus musculus GN=Psma5 PE=1 SV=1	0	3	0	0	0	9	1	0	0	0	0	0	2	0	0	0
sp|Q9QUM9|PSA6_MOUSE	Psma6	Proteasome subunit alpha type-6 OS=Mus musculus GN=Psma6 PE=1 SV=1	1	0	3	1	0	1	1	2	0	0	0	1	0	3	1	2
sp|Q9Z2U0|PSA7_MOUSE	Psma7	Proteasome subunit alpha type-7 OS=Mus musculus GN=Psma7 PE=1 SV=1	0	4	0	2	0	3	1	2	0	0	1	0	0	0	1	2
sp|O09061|PSB1_MOUSE	Psmb1	Proteasome subunit beta type-1 OS=Mus musculus GN=Psmb1 PE=1 SV=1	0	0	2	2	0	6	3	1	0	0	0	0	0	0	0	1
sp|Q9R1P1|PSB3_MOUSE	Psmb3	Proteasome subunit beta type-3 OS=Mus musculus GN=Psmb3 PE=1 SV=1	0	4	0	0	0	4	0	0	2	0	0	0	0	0	0	0
sp|P99026|PSB4_MOUSE	Psmb4	Proteasome subunit beta type-4 OS=Mus musculus GN=Psmb4 PE=1 SV=1	0	6	0	0	0	1	0	0	0	0	0	0	0	0	0	0
sp|O55234|PSB5_MOUSE	Psmb5	Proteasome subunit beta type-5 OS=Mus musculus GN=Psmb5 PE=1 SV=3	0	0	4	7	1	4	1	3	1	0	4	4	4	0	3	5
sp|Q60692|PSB6_MOUSE	Psmb6	Proteasome subunit beta type-6 OS=Mus musculus GN=Psmb6 PE=1 SV=3	0	0	3	4	0	5	2	4	2	2	2	2	0	0	2	2
sp|P70195|PSB7_MOUSE	Psmb7	Proteasome subunit beta type-7 OS=Mus musculus GN=Psmb7 PE=1 SV=1	0	1	0	0	0	1	0	0	0	1	0	0	0	0	0	0
sp|P62192|PRS4_MOUSE	Psmc1	26S protease regulatory subunit 4 OS=Mus musculus GN=Psmc1 PE=1 SV=1	0	2	0	0	0	0	0	0	0	0	0	0	1	0	0	0
sp|O88685|PRS6A_MOUSE	Psmc3	26S protease regulatory subunit 6A OS=Mus musculus GN=Psmc3 PE=1 SV=2	0	1	0	0	0	3	0	0	0	0	0	0	0	0	0	0
sp|P62196|PRS8_MOUSE	Psmc5	26S protease regulatory subunit 8 OS=Mus musculus GN=Psmc5 PE=1 SV=1	0	0	0	0	0	3	0	0	0	0	0	0	0	0	0	0
sp|P62334|PRS10_MOUSE	Psmc6	26S protease regulatory subunit 10B OS=Mus musculus GN=Psmc6 PE=1 SV=1	0	2	0	0	0	1	0	0	0	0	0	0	0	0	0	0
sp|Q3TXS7|PSMD1_MOUSE	Psmd1	26S proteasome non-ATPase regulatory subunit 1 OS=Mus musculus GN=Psmd1 PE=1 SV=1	0	0	4	5	0	0	1	3	0	0	1	3	0	0	0	1
sp|Q8BG32|PSD11_MOUSE	Psmd11	26S proteasome non-ATPase regulatory subunit 11 OS=Mus musculus GN=Psmd11 PE=1 SV=3	0	1	0	0	0	1	0	0	0	0	0	0	0	0	0	0
sp|Q9D8W5|PSD12_MOUSE	Psmd12	26S proteasome non-ATPase regulatory subunit 12 OS=Mus musculus GN=Psmd12 PE=1 SV=4	0	2	1	2	0	4	0	2	2	0	0	0	0	0	0	1
sp|Q9WVJ2|PSD13_MOUSE	Psmd13	26S proteasome non-ATPase regulatory subunit 13 OS=Mus musculus GN=Psmd13 PE=1 SV=1	0	0	0	0	0	1	0	0	0	0	0	0	0	0	0	0
sp|O35593|PSDE_MOUSE	Psmd14	26S proteasome non-ATPase regulatory subunit 14 OS=Mus musculus GN=Psmd14 PE=1 SV=2	0	1	0	0	0	1	0	1	0	0	0	0	0	0	0	0
sp|Q8VDM4|PSMD2_MOUSE	Psmd2	26S proteasome non-ATPase regulatory subunit 2 OS=Mus musculus GN=Psmd2 PE=1 SV=1	0	0	4	5	0	1	5	5	0	1	3	3	0	0	3	4
sp|P14685|PSMD3_MOUSE	Psmd3	26S proteasome non-ATPase regulatory subunit 3 OS=Mus musculus GN=Psmd3 PE=1 SV=3	0	4	5	9	0	5	0	6	13	0	5	4	0	1	8	4
sp|O35226|PSMD4_MOUSE	Psmd4	26S proteasome non-ATPase regulatory subunit 4 OS=Mus musculus GN=Psmd4 PE=1 SV=1	0	0	0	0	0	4	0	0	0	0	0	0	0	0	0	0
sp|Q99JI4|PSMD6_MOUSE	Psmd6	26S proteasome non-ATPase regulatory subunit 6 OS=Mus musculus GN=Psmd6 PE=1 SV=1	0	0	0	0	0	0	0	0	0	0	0	0	0	1	2	0
sp|Q91Z31|PTBP2_MOUSE	Ptbp2	Polypyrimidine tract-binding protein 2 OS=Mus musculus GN=Ptbp2 PE=1 SV=2	0	1	0	0	0	0	0	0	0	0	0	0	0	0	0	0
sp|O08586|PTEN_MOUSE	Pten	Phosphatidylinositol 3,4,5-trisphosphate 3-phosphatase and dual-specificity protein phosphatase PTEN OS=Mus musculus GN=Pten PE=1 SV=1	0	0	0	0	0	1	0	0	0	0	0	0	0	0	0	0
sp|O09114|PTGDS_MOUSE	Ptgds	Prostaglandin-H2 D-isomerase OS=Mus musculus GN=Ptgds PE=1 SV=1	0	0	0	0	0	2	0	0	0	0	0	0	0	0	0	0
sp|Q8VDQ1|PTGR2_MOUSE	Ptgr2	Prostaglandin reductase 2 OS=Mus musculus GN=Ptgr2 PE=1 SV=2	0	0	0	0	0	1	0	0	0	0	0	0	0	0	0	0
sp|P34152|FAK1_MOUSE	Ptk2	Focal adhesion kinase 1 OS=Mus musculus GN=Ptk2 PE=1 SV=3	0	0	0	0	0	0	0	1	0	0	0	0	0	0	0	0
sp|Q9QVP9|FAK2_MOUSE	Ptk2b	Protein-tyrosine kinase 2-beta OS=Mus musculus GN=Ptk2b PE=1 SV=2	0	0	4	5	0	1	4	3	2	0	2	2	0	0	0	5
sp|Q9D0J8|PTMS_MOUSE	Ptms	Parathymosin OS=Mus musculus GN=Ptms PE=1 SV=3	0	0	0	0	0	1	0	0	0	0	0	0	0	0	0	0
sp|P58389|PTPA_MOUSE	Ptpa	Serine/threonine-protein phosphatase 2A activator OS=Mus musculus GN=Ptpa PE=1 SV=1	1	0	2	2	0	4	0	2	3	0	0	1	1	16	2	2
sp|P35235|PTN11_MOUSE	Ptpn11	Tyrosine-protein phosphatase non-receptor type 11 OS=Mus musculus GN=Ptpn11 PE=1 SV=2	0	0	0	0	0	0	0	2	0	0	0	0	0	0	0	0
sp|Q6PB44|PTN23_MOUSE	Ptpn23	Tyrosine-protein phosphatase non-receptor type 23 OS=Mus musculus GN=Ptpn23 PE=1 SV=2	0	0	0	0	0	0	0	0	0	0	0	1	0	0	0	0
sp|P54830|PTN5_MOUSE	Ptpn5	Tyrosine-protein phosphatase non-receptor type 5 OS=Mus musculus GN=Ptpn5 PE=1 SV=2	0	0	0	0	0	0	0	0	0	1	0	0	0	0	0	0
sp|P18052|PTPRA_MOUSE	Ptpra	Receptor-type tyrosine-protein phosphatase alpha OS=Mus musculus GN=Ptpra PE=1 SV=3	0	0	0	0	0	0	0	0	0	0	1	0	0	0	1	1
sp|Q64487|PTPRD_MOUSE	Ptprd	Receptor-type tyrosine-protein phosphatase delta OS=Mus musculus GN=Ptprd PE=1 SV=3	0	2	1	2	0	2	2	3	1	0	0	0	0	0	5	2
sp|P80560|PTPR2_MOUSE	Ptprn2	Receptor-type tyrosine-protein phosphatase N2 OS=Mus musculus GN=Ptprn2 PE=1 SV=2	0	0	0	0	0	1	0	0	0	0	0	0	0	0	0	0
sp|B0V2N1|PTPRS_MOUSE	Ptprs	Receptor-type tyrosine-protein phosphatase S OS=Mus musculus GN=Ptprs PE=1 SV=1	0	0	0	0	0	1	0	1	0	0	0	1	0	1	1	0
sp|B9EKR1|PRPTZ_MOUSE	Ptprz1	Receptor-type tyrosine-protein phosphatase zeta OS=Mus musculus GN=Ptprz1 PE=1 SV=1	2	5	5	4	3	8	6	0	8	1	5	4	4	1	4	0
sp|O54724|PTRF_MOUSE	Ptrf	Polymerase I and transcript release factor OS=Mus musculus GN=Ptrf PE=1 SV=1	0	0	0	0	0	2	0	0	0	0	0	0	0	0	0	0
sp|Q8R2Y8|PTH2_MOUSE	Ptrh2	Peptidyl-tRNA hydrolase 2, mitochondrial OS=Mus musculus GN=Ptrh2 PE=1 SV=1	0	0	0	0	0	0	0	0	0	0	0	1	0	0	1	1
sp|P42669|PURA_MOUSE	Pura	Transcriptional activator protein Pur-alpha OS=Mus musculus GN=Pura PE=1 SV=1	1	13	8	6	0	14	5	3	5	2	4	6	1	3	4	9
sp|O35295|PURB_MOUSE	Purb	Transcriptional activator protein Pur-beta OS=Mus musculus GN=Purb PE=1 SV=3	0	4	1	3	3	2	0	1	0	0	0	1	0	2	1	1
sp|Q922W5|P5CR1_MOUSE	Pycr1	Pyrroline-5-carboxylate reductase 1, mitochondrial OS=Mus musculus GN=Pycr1 PE=1 SV=1	0	0	1	1	0	0	1	0	0	1	1	1	0	0	0	0
sp|Q922Q4|P5CR2_MOUSE	Pycr2	Pyrroline-5-carboxylate reductase 2 OS=Mus musculus GN=Pycr2 PE=1 SV=1	0	0	0	1	0	1	0	1	0	0	0	0	0	0	1	1
sp|Q8CI94|PYGB_MOUSE	Pygb	Glycogen phosphorylase, brain form OS=Mus musculus GN=Pygb PE=1 SV=3	3	13	14	15	4	9	6	18	3	2	12	14	8	5	15	16
sp|Q9WUB3|PYGM_MOUSE	Pygm	Glycogen phosphorylase, muscle form OS=Mus musculus GN=Pygm PE=1 SV=3	0	0	3	4	0	0	1	4	0	0	2	1	0	0	2	3
sp|Q61838|PZP_MOUSE	Pzp	Pregnancy zone protein OS=Mus musculus GN=Pzp PE=1 SV=3	0	0	1	0	0	5	0	0	0	0	0	0	0	0	0	0
sp|Q8BVI4|DHPR_MOUSE	Qdpr	Dihydropteridine reductase OS=Mus musculus GN=Qdpr PE=1 SV=2	1	14	2	5	0	16	3	4	2	2	3	2	5	2	2	7
sp|Q3UNZ8|QORL2_MOUSE	QORL2	Quinone oxidoreductase-like protein 2 OS=Mus musculus PE=1 SV=1	0	0	1	3	0	1	0	1	0	0	0	0	0	0	1	1
sp|P61027|RAB10_MOUSE	Rab10	Ras-related protein Rab-10 OS=Mus musculus GN=Rab10 PE=1 SV=1	13	22	8	7	11	26	9	9	7	7	8	8	8	11	7	10
sp|P46638|RB11B_MOUSE	Rab11b	Ras-related protein Rab-11B OS=Mus musculus GN=Rab11b PE=1 SV=3	0	7	0	0	0	10	1	0	1	0	0	0	0	0	0	0
sp|Q8R361|RFIP5_MOUSE	Rab11fip5	Rab11 family-interacting protein 5 OS=Mus musculus GN=Rab11fip5 PE=1 SV=2	0	0	0	0	0	1	0	0	0	0	0	0	0	0	0	0
sp|Q91V41|RAB14_MOUSE	Rab14	Ras-related protein Rab-14 OS=Mus musculus GN=Rab14 PE=1 SV=3	2	7	6	6	2	15	7	4	5	10	5	4	3	3	7	7
sp|P35293|RAB18_MOUSE	Rab18	Ras-related protein Rab-18 OS=Mus musculus GN=Rab18 PE=1 SV=2	0	3	0	1	0	6	0	0	2	0	0	0	5	2	0	0
sp|P62821|RAB1A_MOUSE	Rab1A	Ras-related protein Rab-1A OS=Mus musculus GN=Rab1A PE=1 SV=3	6	7	13	10	7	9	6	11	7	6	8	9	13	11	7	10
sp|Q9D1G1|RAB1B_MOUSE	Rab1b	Ras-related protein Rab-1B OS=Mus musculus GN=Rab1b PE=1 SV=1	2	5	3	3	1	5	2	5	1	8	1	1	1	0	2	3
sp|P35282|RAB21_MOUSE	Rab21	Ras-related protein Rab-21 OS=Mus musculus GN=Rab21 PE=1 SV=4	0	0	1	0	0	3	0	0	0	0	0	0	0	1	1	1
sp|P35288|RAB23_MOUSE	Rab23	Ras-related protein Rab-23 OS=Mus musculus GN=Rab23 PE=1 SV=2	0	0	0	0	0	1	0	0	0	0	0	0	0	0	0	0
sp|P35290|RAB24_MOUSE	Rab24	Ras-related protein Rab-24 OS=Mus musculus GN=Rab24 PE=1 SV=2	0	0	0	0	0	1	0	2	0	0	1	0	0	0	0	0
sp|P53994|RAB2A_MOUSE	Rab2a	Ras-related protein Rab-2A OS=Mus musculus GN=Rab2a PE=1 SV=1	16	3	3	3	5	6	3	2	1	3	2	2	1	1	3	4
sp|P59279|RAB2B_MOUSE	Rab2b	Ras-related protein Rab-2B OS=Mus musculus GN=Rab2b PE=1 SV=1	4	4	5	5	3	9	2	4	2	2	3	5	2	3	3	3
sp|Q6PHN9|RAB35_MOUSE	Rab35	Ras-related protein Rab-35 OS=Mus musculus GN=Rab35 PE=1 SV=1	1	4	6	4	4	3	1	3	3	2	3	2	0	1	4	3
sp|P63011|RAB3A_MOUSE	Rab3a	Ras-related protein Rab-3A OS=Mus musculus GN=Rab3a PE=1 SV=1	21	33	18	15	13	29	15	19	28	9	16	13	64	12	15	14
sp|Q9CZT8|RAB3B_MOUSE	Rab3b	Ras-related protein Rab-3B OS=Mus musculus GN=Rab3b PE=1 SV=1	3	4	2	5	1	2	2	3	3	2	2	3	6	4	3	3
sp|P62823|RAB3C_MOUSE	Rab3c	Ras-related protein Rab-3C OS=Mus musculus GN=Rab3c PE=1 SV=1	5	3	7	9	7	7	6	9	17	14	9	8	14	4	9	4
sp|P35276|RAB3D_MOUSE	Rab3d	Ras-related protein Rab-3D OS=Mus musculus GN=Rab3d PE=1 SV=1	0	1	0	0	0	0	0	0	0	0	0	0	0	0	0	0
sp|Q80UJ7|RB3GP_MOUSE	Rab3gap1	Rab3 GTPase-activating protein catalytic subunit OS=Mus musculus GN=Rab3gap1 PE=1 SV=4	0	2	0	0	0	0	0	0	0	0	0	0	0	0	0	0
sp|Q8BMG7|RBGPR_MOUSE	Rab3gap2	Rab3 GTPase-activating protein non-catalytic subunit OS=Mus musculus GN=Rab3gap2 PE=1 SV=2	0	1	1	1	0	0	1	1	0	0	0	0	0	0	2	0
sp|P56371|RAB4A_MOUSE	Rab4a	Ras-related protein Rab-4A OS=Mus musculus GN=Rab4a PE=1 SV=2	0	0	0	0	0	0	0	1	0	0	0	0	0	0	0	0
sp|Q91ZR1|RAB4B_MOUSE	Rab4b	Ras-related protein Rab-4B OS=Mus musculus GN=Rab4b PE=1 SV=2	0	0	0	0	0	3	0	1	0	0	0	0	0	0	0	0
sp|Q9CQD1|RAB5A_MOUSE	Rab5a	Ras-related protein Rab-5A OS=Mus musculus GN=Rab5a PE=1 SV=1	0	9	8	6	1	9	5	3	3	2	3	2	0	0	5	3
sp|P61021|RAB5B_MOUSE	Rab5b	Ras-related protein Rab-5B OS=Mus musculus GN=Rab5b PE=1 SV=1	2	7	4	5	1	12	1	6	0	0	4	5	3	1	7	6
sp|P35278|RAB5C_MOUSE	Rab5c	Ras-related protein Rab-5C OS=Mus musculus GN=Rab5c PE=1 SV=2	3	8	1	1	1	4	1	2	2	5	2	1	5	6	3	4
sp|P35279|RAB6A_MOUSE	Rab6a	Ras-related protein Rab-6A OS=Mus musculus GN=Rab6a PE=1 SV=4	1	1	1	1	0	2	1	1	1	0	0	0	1	0	0	0
sp|P61294|RAB6B_MOUSE	Rab6b	Ras-related protein Rab-6B OS=Mus musculus GN=Rab6b PE=1 SV=1	1	7	3	1	0	6	1	1	1	0	0	2	1	1	1	1
sp|P51150|RAB7A_MOUSE	Rab7a	Ras-related protein Rab-7a OS=Mus musculus GN=Rab7a PE=1 SV=2	0	6	10	9	0	9	5	5	2	0	4	7	2	0	6	5
sp|P55258|RAB8A_MOUSE	Rab8a	Ras-related protein Rab-8A OS=Mus musculus GN=Rab8a PE=1 SV=2	1	1	0	0	1	1	0	0	0	1	0	0	1	2	0	0
sp|P61028|RAB8B_MOUSE	Rab8b	Ras-related protein Rab-8B OS=Mus musculus GN=Rab8b PE=1 SV=1	1	2	3	2	0	0	0	1	0	0	1	3	1	1	1	0
sp|Q9R0M6|RAB9A_MOUSE	Rab9a	Ras-related protein Rab-9A OS=Mus musculus GN=Rab9a PE=1 SV=1	0	0	0	0	0	1	0	0	0	0	0	0	0	0	0	0
sp|Q8BHH2|RAB9B_MOUSE	Rab9b	Ras-related protein Rab-9B OS=Mus musculus GN=Rab9b PE=1 SV=1	0	0	0	0	0	2	0	0	0	0	0	0	0	0	0	0
sp|A2AWA9|RBGP1_MOUSE	Rabgap1	Rab GTPase-activating protein 1 OS=Mus musculus GN=Rabgap1 PE=1 SV=1	0	0	0	0	0	2	0	0	0	0	0	0	0	0	0	0
sp|Q9JHK4|PGTA_MOUSE	Rabggta	Geranylgeranyl transferase type-2 subunit alpha OS=Mus musculus GN=Rabggta PE=1 SV=1	0	0	0	1	0	0	0	0	0	0	0	0	0	0	0	0
sp|P53612|PGTB2_MOUSE	Rabggtb	Geranylgeranyl transferase type-2 subunit beta OS=Mus musculus GN=Rabggtb PE=1 SV=2	0	0	0	0	0	0	0	0	0	0	0	1	0	0	0	0
sp|Q5U3K5|RABL6_MOUSE	Rabl6	Rab-like protein 6 OS=Mus musculus GN=Rabl6 PE=1 SV=2	0	0	0	0	0	1	0	0	0	0	0	2	0	1	0	1
sp|P63001|RAC1_MOUSE	Rac1	Ras-related C3 botulinum toxin substrate 1 OS=Mus musculus GN=Rac1 PE=1 SV=1	7	2	7	7	2	8	5	6	3	2	5	6	4	12	5	5
sp|P60764|RAC3_MOUSE	Rac3	Ras-related C3 botulinum toxin substrate 3 OS=Mus musculus GN=Rac3 PE=1 SV=1	0	0	1	1	0	0	0	1	0	0	1	0	0	0	1	1
sp|P68040|RACK1_MOUSE	Rack1	Receptor of activated protein C kinase 1 OS=Mus musculus GN=Rack1 PE=1 SV=3	1	5	1	0	0	6	2	4	0	2	0	0	1	3	3	0
sp|P63321|RALA_MOUSE	Rala	Ras-related protein Ral-A OS=Mus musculus GN=Rala PE=1 SV=1	0	4	0	1	0	4	0	0	2	0	0	0	0	0	0	0
sp|Q6GYP7|RGPA1_MOUSE	Ralgapa1	Ral GTPase-activating protein subunit alpha-1 OS=Mus musculus GN=Ralgapa1 PE=1 SV=1	0	0	0	0	0	0	0	0	0	0	0	0	1	0	0	0
sp|P62827|RAN_MOUSE	Ran	GTP-binding nuclear protein Ran OS=Mus musculus GN=Ran PE=1 SV=3	5	4	2	2	0	3	0	1	3	0	0	3	25	2	1	2
sp|P34022|RANG_MOUSE	Ranbp1	Ran-specific GTPase-activating protein OS=Mus musculus GN=Ranbp1 PE=1 SV=2	0	0	0	0	0	1	0	0	0	0	0	0	0	0	0	0
sp|P62835|RAP1A_MOUSE	Rap1a	Ras-related protein Rap-1A OS=Mus musculus GN=Rap1a PE=1 SV=1	1	4	0	0	1	7	0	0	3	1	0	0	0	0	0	0
sp|A2ALS5|RPGP1_MOUSE	Rap1gap	Rap1 GTPase-activating protein 1 OS=Mus musculus GN=Rap1gap PE=1 SV=2	0	8	1	1	1	2	2	3	0	0	0	0	0	0	0	0
sp|Q5SVL6|RPGP2_MOUSE	Rap1gap2	Rap1 GTPase-activating protein 2 OS=Mus musculus GN=Rap1gap2 PE=1 SV=1	0	0	0	0	0	1	0	0	0	0	0	0	0	0	0	0
tr|Q3TU36|Q3TU36_MOUSE	Rap1gds1	Putative uncharacterized protein OS=Mus musculus GN=Rap1gds1 PE=1 SV=1	0	0	3	1	0	9	2	0	1	0	1	1	2	0	1	1
sp|Q80ZJ1|RAP2A_MOUSE	Rap2a	Ras-related protein Rap-2a OS=Mus musculus GN=Rap2a PE=1 SV=2	1	0	1	1	0	3	1	1	0	0	1	1	1	0	1	1
sp|P61226|RAP2B_MOUSE	Rap2b	Ras-related protein Rap-2b OS=Mus musculus GN=Rap2b PE=1 SV=1	0	7	0	1	3	4	0	3	4	1	0	0	1	2	4	5
sp|Q8BU31|RAP2C_MOUSE	Rap2c	Ras-related protein Rap-2c OS=Mus musculus GN=Rap2c PE=1 SV=1	0	3	0	0	0	0	0	0	0	0	0	0	0	0	0	0
sp|Q8CHG7|RPGF2_MOUSE	Rapgef2	Rap guanine nucleotide exchange factor 2 OS=Mus musculus GN=Rapgef2 PE=1 SV=2	0	0	0	0	0	0	0	2	0	0	0	1	0	0	0	2
sp|Q9EQZ6|RPGF4_MOUSE	Rapgef4	Rap guanine nucleotide exchange factor 4 OS=Mus musculus GN=Rapgef4 PE=1 SV=1	0	0	0	1	0	0	0	0	0	0	0	0	0	0	3	0
sp|Q9Z268|RASL1_MOUSE	Rasal1	RasGAP-activating-like protein 1 OS=Mus musculus GN=Rasal1 PE=1 SV=2	0	2	0	0	0	2	0	0	0	0	0	0	0	0	0	0
sp|Q61820|RANT_MOUSE	Rasl2-9	GTP-binding nuclear protein Ran, testis-specific isoform OS=Mus musculus GN=Rasl2-9 PE=2 SV=1	1	1	2	3	0	5	1	2	1	1	1	1	1	1	4	2
sp|Q8CJ96|RASF8_MOUSE	Rassf8	Ras association domain-containing protein 8 OS=Mus musculus GN=Rassf8 PE=2 SV=1	1	0	0	0	0	0	0	0	0	0	0	0	0	0	0	0
sp|P26043|RADI_MOUSE	Rdx	Radixin OS=Mus musculus GN=Rdx PE=1 SV=3	0	0	0	0	0	2	0	0	0	0	0	0	0	0	0	0
sp|Q8BGH4|REEP1_MOUSE	Reep1	Receptor expression-enhancing protein 1 OS=Mus musculus GN=Reep1 PE=1 SV=1	0	0	1	2	0	0	0	2	0	0	1	0	0	0	1	1
sp|Q8VCD6|REEP2_MOUSE	Reep2	Receptor expression-enhancing protein 2 OS=Mus musculus GN=Reep2 PE=1 SV=2	0	0	0	0	0	2	0	0	0	0	0	0	0	0	1	0
sp|Q60870|REEP5_MOUSE	Reep5	Receptor expression-enhancing protein 5 OS=Mus musculus GN=Reep5 PE=1 SV=1	1	0	1	1	1	0	1	3	0	1	1	1	1	0	1	3
sp|Q9CQU3|RER1_MOUSE	Rer1	Protein RER1 OS=Mus musculus GN=Rer1 PE=1 SV=1	0	0	0	0	0	0	0	0	0	0	0	0	0	2	0	0
sp|Q6NS82|RETR2_MOUSE	Retreg2	Reticulophagy regulator 2 OS=Mus musculus GN=Retreg2 PE=1 SV=2	0	0	0	0	0	2	0	0	0	0	0	0	0	0	0	0
sp|Q8CHX7|RFTN2_MOUSE	Rftn2	Raftlin-2 OS=Mus musculus GN=Rftn2 PE=1 SV=3	0	0	1	0	0	0	0	1	0	0	0	0	0	0	0	1
sp|P97492|RGS14_MOUSE	Rgs14	Regulator of G-protein signaling 14 OS=Mus musculus GN=Rgs14 PE=1 SV=2	0	0	0	0	0	1	0	0	0	0	0	0	0	0	0	0
sp|Q9Z2H2|RGS6_MOUSE	Rgs6	Regulator of G-protein signaling 6 OS=Mus musculus GN=Rgs6 PE=1 SV=2	0	0	0	0	0	2	0	0	0	0	0	0	0	0	0	0
sp|O54829|RGS7_MOUSE	Rgs7	Regulator of G-protein signaling 7 OS=Mus musculus GN=Rgs7 PE=1 SV=2	0	1	0	0	0	1	0	1	0	0	0	0	0	0	0	0
sp|Q8BQP9|R7BP_MOUSE	Rgs7bp	Regulator of G-protein signaling 7-binding protein OS=Mus musculus GN=Rgs7bp PE=1 SV=1	0	0	0	0	0	0	0	2	0	0	0	0	0	0	0	1
sp|Q921J2|RHEB_MOUSE	Rheb	GTP-binding protein Rheb OS=Mus musculus GN=Rheb PE=1 SV=1	0	6	2	1	0	2	0	0	1	0	0	0	0	1	1	0
sp|Q9QUI0|RHOA_MOUSE	Rhoa	Transforming protein RhoA OS=Mus musculus GN=Rhoa PE=1 SV=1	0	2	3	0	0	0	0	0	3	4	0	2	4	3	2	0
sp|P62746|RHOB_MOUSE	Rhob	Rho-related GTP-binding protein RhoB OS=Mus musculus GN=Rhob PE=1 SV=1	0	0	0	0	0	0	0	0	1	0	0	0	0	1	0	0
sp|Q62159|RHOC_MOUSE	Rhoc	Rho-related GTP-binding protein RhoC OS=Mus musculus GN=Rhoc PE=1 SV=2	4	6	2	3	0	2	0	2	3	0	0	0	0	0	4	2
sp|P84096|RHOG_MOUSE	Rhog	Rho-related GTP-binding protein RhoG OS=Mus musculus GN=Rhog PE=1 SV=1	0	2	4	5	0	15	3	6	4	1	3	6	0	0	5	6
sp|Q8BG51|MIRO1_MOUSE	Rhot1	Mitochondrial Rho GTPase 1 OS=Mus musculus GN=Rhot1 PE=1 SV=1	0	0	0	4	0	0	0	4	0	0	2	0	0	0	0	0
sp|P52760|RIDA_MOUSE	Rida	2-iminobutanoate/2-iminopropanoate deaminase OS=Mus musculus GN=Rida PE=1 SV=3	0	5	0	2	0	19	0	0	0	0	0	0	1	0	0	0
sp|Q80U40|RIMB2_MOUSE	Rimbp2	RIMS-binding protein 2 OS=Mus musculus GN=Rimbp2 PE=1 SV=3	0	0	0	0	0	1	0	0	0	0	0	0	0	0	0	0
sp|Q99NE5|RIMS1_MOUSE	Rims1	Regulating synaptic membrane exocytosis protein 1 OS=Mus musculus GN=Rims1 PE=1 SV=2	0	5	5	7	2	3	0	5	13	4	17	12	0	0	2	1
sp|Q9EQZ7|RIMS2_MOUSE	Rims2	Regulating synaptic membrane exocytosis protein 2 OS=Mus musculus GN=Rims2 PE=1 SV=1	0	0	0	0	0	0	0	0	1	0	2	0	0	0	0	0
sp|Q3UJU9|RMD3_MOUSE	Rmdn3	Regulator of microtubule dynamics protein 3 OS=Mus musculus GN=Rmdn3 PE=1 SV=2	0	0	0	0	0	2	0	0	0	0	0	0	0	0	0	0
sp|Q8CI78|RMND1_MOUSE	Rmnd1	Required for meiotic nuclear division protein 1 homolog OS=Mus musculus GN=Rmnd1 PE=1 SV=1	0	0	0	0	0	1	0	0	0	0	0	0	0	0	0	0
sp|Q9JI90|RNF14_MOUSE	Rnf14	E3 ubiquitin-protein ligase RNF14 OS=Mus musculus GN=Rnf14 PE=1 SV=2	0	0	1	1	0	0	0	0	0	0	0	1	0	0	0	0
sp|Q91VI7|RINI_MOUSE	Rnh1	Ribonuclease inhibitor OS=Mus musculus GN=Rnh1 PE=1 SV=1	0	0	0	0	0	1	0	0	0	0	0	0	0	0	0	0
sp|Q8VCT3|AMPB_MOUSE	Rnpep	Aminopeptidase B OS=Mus musculus GN=Rnpep PE=1 SV=2	0	3	6	4	0	0	2	5	0	0	4	4	0	0	5	2
sp|P70336|ROCK2_MOUSE	Rock2	Rho-associated protein kinase 2 OS=Mus musculus GN=Rock2 PE=1 SV=1	0	0	0	0	0	0	0	1	0	0	0	0	0	0	0	0
sp|Q3TDK6|ROGDI_MOUSE	Rogdi	Protein rogdi homolog OS=Mus musculus GN=Rogdi PE=1 SV=2	0	0	1	1	0	1	0	0	0	0	0	0	0	0	1	2
sp|P47708|RP3A_MOUSE	Rph3a	Rabphilin-3A OS=Mus musculus GN=Rph3a PE=1 SV=2	0	2	7	6	0	6	4	5	1	1	4	6	0	0	4	5
sp|Q9CXW4|RL11_MOUSE	Rpl11	60S ribosomal protein L11 OS=Mus musculus GN=Rpl11 PE=1 SV=4	0	0	0	0	0	3	0	0	0	0	0	0	0	0	0	0
sp|P35979|RL12_MOUSE	Rpl12	60S ribosomal protein L12 OS=Mus musculus GN=Rpl12 PE=1 SV=2	0	0	0	0	0	1	0	0	0	0	0	0	0	0	0	0
sp|P47963|RL13_MOUSE	Rpl13	60S ribosomal protein L13 OS=Mus musculus GN=Rpl13 PE=1 SV=3	0	0	4	1	0	5	1	3	8	1	2	1	3	4	2	0
sp|P19253|RL13A_MOUSE	Rpl13a	60S ribosomal protein L13a OS=Mus musculus GN=Rpl13a PE=1 SV=4	0	0	0	0	0	0	0	0	0	1	0	0	0	0	0	0
sp|Q9CZM2|RL15_MOUSE	Rpl15	60S ribosomal protein L15 OS=Mus musculus GN=Rpl15 PE=2 SV=4	0	0	0	0	0	0	0	0	0	0	0	0	0	0	1	0
sp|Q9CPR4|RL17_MOUSE	Rpl17	60S ribosomal protein L17 OS=Mus musculus GN=Rpl17 PE=1 SV=3	0	0	0	0	0	3	0	0	2	1	0	0	0	0	0	0
sp|P35980|RL18_MOUSE	Rpl18	60S ribosomal protein L18 OS=Mus musculus GN=Rpl18 PE=1 SV=3	0	0	0	1	0	0	0	0	1	0	1	0	0	0	0	0
sp|P84099|RL19_MOUSE	Rpl19	60S ribosomal protein L19 OS=Mus musculus GN=Rpl19 PE=1 SV=1	0	0	2	0	0	2	0	1	0	0	0	0	1	1	0	0
sp|P67984|RL22_MOUSE	Rpl22	60S ribosomal protein L22 OS=Mus musculus GN=Rpl22 PE=1 SV=2	0	1	0	0	0	2	1	1	0	0	0	0	1	2	0	1
sp|P62830|RL23_MOUSE	Rpl23	60S ribosomal protein L23 OS=Mus musculus GN=Rpl23 PE=1 SV=1	0	0	1	1	0	1	0	1	0	1	0	0	0	0	1	1
sp|P62751|RL23A_MOUSE	Rpl23a	60S ribosomal protein L23a OS=Mus musculus GN=Rpl23a PE=1 SV=1	0	0	0	0	0	0	0	1	0	0	0	0	0	0	0	0
sp|P61358|RL27_MOUSE	Rpl27	60S ribosomal protein L27 OS=Mus musculus GN=Rpl27 PE=1 SV=2	0	0	0	0	0	2	0	0	0	0	0	0	1	0	0	0
sp|P14115|RL27A_MOUSE	Rpl27a	60S ribosomal protein L27a OS=Mus musculus GN=Rpl27a PE=1 SV=5	0	0	1	0	0	0	0	1	2	0	0	1	0	0	0	0
sp|P41105|RL28_MOUSE	Rpl28	60S ribosomal protein L28 OS=Mus musculus GN=Rpl28 PE=1 SV=2	0	0	0	0	0	0	2	2	0	0	0	0	0	0	1	0
sp|P47915|RL29_MOUSE	Rpl29	60S ribosomal protein L29 OS=Mus musculus GN=Rpl29 PE=2 SV=2	0	0	0	0	0	1	0	0	1	0	0	0	1	0	0	0
sp|P27659|RL3_MOUSE	Rpl3	60S ribosomal protein L3 OS=Mus musculus GN=Rpl3 PE=1 SV=3	0	0	0	0	0	2	0	3	0	0	0	0	1	0	2	0
sp|P62900|RL31_MOUSE	Rpl31	60S ribosomal protein L31 OS=Mus musculus GN=Rpl31 PE=1 SV=1	0	0	0	0	0	1	0	0	0	0	0	0	0	0	0	0
sp|Q9D1R9|RL34_MOUSE	Rpl34	60S ribosomal protein L34 OS=Mus musculus GN=Rpl34 PE=1 SV=2	0	0	0	1	0	0	0	0	0	0	0	0	0	0	0	0
sp|P61514|RL37A_MOUSE	Rpl37a	60S ribosomal protein L37a OS=Mus musculus GN=Rpl37a PE=1 SV=2	0	0	0	1	0	0	0	1	0	1	0	0	0	0	0	0
sp|Q9D8E6|RL4_MOUSE	Rpl4	60S ribosomal protein L4 OS=Mus musculus GN=Rpl4 PE=1 SV=3	0	0	0	0	0	0	0	2	0	0	0	0	0	0	0	0
sp|P47962|RL5_MOUSE	Rpl5	60S ribosomal protein L5 OS=Mus musculus GN=Rpl5 PE=1 SV=3	0	0	0	0	0	0	0	0	2	7	0	0	1	0	0	0
sp|P47911|RL6_MOUSE	Rpl6	60S ribosomal protein L6 OS=Mus musculus GN=Rpl6 PE=1 SV=3	0	0	1	1	0	0	1	2	0	1	1	1	0	0	1	0
sp|P14148|RL7_MOUSE	Rpl7	60S ribosomal protein L7 OS=Mus musculus GN=Rpl7 PE=1 SV=2	0	0	1	0	0	1	0	0	3	1	0	0	4	0	1	0
sp|P12970|RL7A_MOUSE	Rpl7a	60S ribosomal protein L7a OS=Mus musculus GN=Rpl7a PE=1 SV=2	0	4	1	3	1	4	0	2	2	0	0	2	0	0	1	1
sp|P62918|RL8_MOUSE	Rpl8	60S ribosomal protein L8 OS=Mus musculus GN=Rpl8 PE=1 SV=2	0	1	2	1	0	0	1	2	0	0	1	1	0	0	1	0
sp|P51410|RL9_MOUSE	Rpl9	60S ribosomal protein L9 OS=Mus musculus GN=Rpl9 PE=2 SV=2	2	2	0	0	0	0	0	0	1	0	0	1	0	2	0	1
sp|P14869|RLA0_MOUSE	Rplp0	60S acidic ribosomal protein P0 OS=Mus musculus GN=Rplp0 PE=1 SV=3	0	0	0	0	0	2	0	0	0	0	0	0	0	0	0	0
sp|P47955|RLA1_MOUSE	Rplp1	60S acidic ribosomal protein P1 OS=Mus musculus GN=Rplp1 PE=1 SV=1	0	0	0	1	0	0	0	0	0	0	0	0	0	0	0	0
sp|P99027|RLA2_MOUSE	Rplp2	60S acidic ribosomal protein P2 OS=Mus musculus GN=Rplp2 PE=1 SV=3	0	0	0	0	0	1	0	0	0	0	0	0	0	0	0	0
sp|Q91YQ5|RPN1_MOUSE	Rpn1	Dolichyl-diphosphooligosaccharide--protein glycosyltransferase subunit 1 OS=Mus musculus GN=Rpn1 PE=1 SV=1	0	0	5	2	0	0	3	3	0	0	3	2	0	0	2	3
sp|Q9DBG6|RPN2_MOUSE	Rpn2	Dolichyl-diphosphooligosaccharide--protein glycosyltransferase subunit 2 OS=Mus musculus GN=Rpn2 PE=1 SV=1	0	2	5	5	1	2	2	6	3	1	8	7	0	0	4	7
tr|J3QMX0|J3QMX0_MOUSE	Rpp14	Ribonuclease P 14 subunit (Human) OS=Mus musculus GN=Rpp14 PE=1 SV=1	0	0	0	1	0	0	0	0	0	0	0	0	0	0	0	1
sp|P62281|RS11_MOUSE	Rps11	40S ribosomal protein S11 OS=Mus musculus GN=Rps11 PE=1 SV=3	0	0	0	0	0	0	1	0	0	0	0	0	0	0	0	0
sp|P62264|RS14_MOUSE	Rps14	40S ribosomal protein S14 OS=Mus musculus GN=Rps14 PE=1 SV=3	1	4	1	2	0	0	1	2	0	0	1	1	2	0	1	1
sp|P62245|RS15A_MOUSE	Rps15a	40S ribosomal protein S15a OS=Mus musculus GN=Rps15a PE=1 SV=2	0	0	0	0	0	3	0	1	0	0	0	0	0	0	0	0
sp|P14131|RS16_MOUSE	Rps16	40S ribosomal protein S16 OS=Mus musculus GN=Rps16 PE=1 SV=4	0	1	3	2	0	2	2	3	0	1	1	2	3	0	2	2
sp|Q9CZX8|RS19_MOUSE	Rps19	40S ribosomal protein S19 OS=Mus musculus GN=Rps19 PE=1 SV=3	0	1	0	0	0	0	0	0	0	0	0	0	0	0	0	0
sp|P25444|RS2_MOUSE	Rps2	40S ribosomal protein S2 OS=Mus musculus GN=Rps2 PE=1 SV=3	0	2	3	0	0	0	1	3	0	0	1	2	0	0	1	0
sp|P60867|RS20_MOUSE	Rps20	40S ribosomal protein S20 OS=Mus musculus GN=Rps20 PE=1 SV=1	0	0	0	0	0	1	0	0	0	0	0	0	0	0	0	0
sp|Q9CQR2|RS21_MOUSE	Rps21	40S ribosomal protein S21 OS=Mus musculus GN=Rps21 PE=1 SV=1	0	0	0	0	0	1	0	0	0	0	0	0	0	0	0	0
sp|P62267|RS23_MOUSE	Rps23	40S ribosomal protein S23 OS=Mus musculus GN=Rps23 PE=1 SV=3	0	0	0	0	0	0	0	0	0	0	0	0	0	0	1	0
sp|P62852|RS25_MOUSE	Rps25	40S ribosomal protein S25 OS=Mus musculus GN=Rps25 PE=1 SV=1	0	0	0	0	0	1	0	0	0	0	0	0	0	0	0	0
sp|P62855|RS26_MOUSE	Rps26	40S ribosomal protein S26 OS=Mus musculus GN=Rps26 PE=1 SV=3	0	0	1	0	0	0	0	1	0	0	0	0	0	0	0	1
sp|Q6ZWU9|RS27_MOUSE	Rps27	40S ribosomal protein S27 OS=Mus musculus GN=Rps27 PE=1 SV=3	0	1	2	1	0	0	0	2	0	0	1	2	0	0	1	1
sp|P62983|RS27A_MOUSE	Rps27a	Ubiquitin-40S ribosomal protein S27a OS=Mus musculus GN=Rps27a PE=1 SV=2	0	10	9	4	4	9	5	5	5	4	3	7	1	5	4	6
sp|P62908|RS3_MOUSE	Rps3	40S ribosomal protein S3 OS=Mus musculus GN=Rps3 PE=1 SV=1	1	4	4	2	1	12	3	4	6	7	3	6	6	2	5	4
sp|P97351|RS3A_MOUSE	Rps3a	40S ribosomal protein S3a OS=Mus musculus GN=Rps3a PE=1 SV=3	0	0	0	0	0	1	0	0	0	0	0	0	0	0	0	0
sp|P62702|RS4X_MOUSE	Rps4x	40S ribosomal protein S4, X isoform OS=Mus musculus GN=Rps4x PE=1 SV=2	0	1	1	0	1	2	0	0	1	0	0	0	0	0	0	0
sp|P62754|RS6_MOUSE	Rps6	40S ribosomal protein S6 OS=Mus musculus GN=Rps6 PE=1 SV=1	2	2	0	0	0	3	2	4	4	0	0	2	0	2	4	0
sp|P62082|RS7_MOUSE	Rps7	40S ribosomal protein S7 OS=Mus musculus GN=Rps7 PE=2 SV=1	0	1	0	0	0	1	0	0	3	0	0	0	0	1	1	0
sp|P62242|RS8_MOUSE	Rps8	40S ribosomal protein S8 OS=Mus musculus GN=Rps8 PE=1 SV=2	2	0	2	1	0	2	1	3	1	1	1	0	2	3	0	1
sp|Q6ZWN5|RS9_MOUSE	Rps9	40S ribosomal protein S9 OS=Mus musculus GN=Rps9 PE=1 SV=3	0	0	3	3	0	5	0	2	1	1	2	4	0	0	2	2
sp|P14206|RSSA_MOUSE	Rpsa	40S ribosomal protein SA OS=Mus musculus GN=Rpsa PE=1 SV=4	0	0	0	0	0	3	0	0	1	0	0	0	0	0	0	0
sp|Q6NTA4|RRAGB_MOUSE	Rragb	Ras-related GTP-binding protein B OS=Mus musculus GN=Rragb PE=1 SV=1	0	0	0	0	0	2	0	1	1	1	0	1	1	1	1	0
sp|Q99K70|RRAGC_MOUSE	Rragc	Ras-related GTP-binding protein C OS=Mus musculus GN=Rragc PE=1 SV=1	0	0	0	0	0	1	0	0	0	0	1	0	0	1	0	0
sp|P10833|RRAS_MOUSE	Rras	Ras-related protein R-Ras OS=Mus musculus GN=Rras PE=1 SV=1	0	0	0	0	0	1	0	0	0	0	0	0	0	0	0	0
sp|P62071|RRAS2_MOUSE	Rras2	Ras-related protein R-Ras2 OS=Mus musculus GN=Rras2 PE=1 SV=1	0	0	1	0	0	0	0	1	0	0	0	1	0	0	0	0
sp|Q91YK2|RRP1B_MOUSE	Rrp1b	Ribosomal RNA processing protein 1 homolog B OS=Mus musculus GN=Rrp1b PE=1 SV=2	0	0	1	0	0	0	0	0	0	0	0	2	0	0	0	0
sp|Q99LF4|RTCB_MOUSE	Rtcb	tRNA-splicing ligase RtcB homolog OS=Mus musculus GN=Rtcb PE=1 SV=1	0	1	0	0	0	0	0	0	0	0	0	0	0	0	0	0
sp|Q8K0T0|RTN1_MOUSE	Rtn1	Reticulon-1 OS=Mus musculus GN=Rtn1 PE=1 SV=1	16	20	21	19	9	28	12	15	10	10	11	16	9	9	13	10
sp|Q9ES97|RTN3_MOUSE	Rtn3	Reticulon-3 OS=Mus musculus GN=Rtn3 PE=1 SV=2	14	18	11	13	6	20	8	8	17	6	10	11	7	5	13	12
sp|Q99P72|RTN4_MOUSE	Rtn4	Reticulon-4 OS=Mus musculus GN=Rtn4 PE=1 SV=2	47	22	21	21	20	27	10	12	27	22	18	20	14	23	22	20
sp|Q9D394|RUFY3_MOUSE	Rufy3	Protein RUFY3 OS=Mus musculus GN=Rufy3 PE=1 SV=1	0	2	0	1	0	4	0	0	0	0	0	0	0	0	0	0
sp|P56565|S10A1_MOUSE	S100a1	Protein S100-A1 OS=Mus musculus GN=S100a1 PE=1 SV=2	0	1	0	0	0	0	0	0	0	0	0	0	1	0	0	1
sp|P97352|S10AD_MOUSE	S100a13	Protein S100-A13 OS=Mus musculus GN=S100a13 PE=1 SV=1	0	0	0	0	0	1	0	0	0	0	0	0	0	0	0	0
tr|Q9D708|Q9D708_MOUSE	S100a16	Putative uncharacterized protein OS=Mus musculus GN=S100a16 PE=1 SV=1	0	0	0	0	0	0	1	0	0	0	0	0	0	0	0	0
sp|O08530|S1PR1_MOUSE	S1pr1	Sphingosine 1-phosphate receptor 1 OS=Mus musculus GN=S1pr1 PE=1 SV=3	0	0	0	1	0	1	0	0	0	0	0	0	0	0	0	0
sp|Q9EP69|SAC1_MOUSE	Sacm1l	Phosphatidylinositide phosphatase SAC1 OS=Mus musculus GN=Sacm1l PE=1 SV=1	1	0	1	2	1	0	0	1	0	0	0	3	0	0	0	1
sp|Q9R1T2|SAE1_MOUSE	Sae1	SUMO-activating enzyme subunit 1 OS=Mus musculus GN=Sae1 PE=1 SV=1	0	1	0	1	0	0	0	0	0	0	0	0	0	0	0	1
sp|Q8BGH2|SAM50_MOUSE	Samm50	Sorting and assembly machinery component 50 homolog OS=Mus musculus GN=Samm50 PE=1 SV=1	0	1	0	2	0	0	0	3	0	0	0	0	0	0	0	1
sp|P36536|SAR1A_MOUSE	Sar1a	GTP-binding protein SAR1a OS=Mus musculus GN=Sar1a PE=1 SV=1	0	0	0	0	0	0	0	0	2	0	0	0	0	0	0	0
sp|P26638|SYSC_MOUSE	Sars	Serine--tRNA ligase, cytoplasmic OS=Mus musculus GN=Sars PE=1 SV=3	0	2	0	0	0	1	0	0	0	0	0	0	0	0	0	0
sp|Q6ZPE2|MTMR5_MOUSE	Sbf1	Myotubularin-related protein 5 OS=Mus musculus GN=Sbf1 PE=1 SV=2	0	0	6	5	0	0	0	3	0	0	1	0	0	0	6	2
sp|Q8K021|SCAM1_MOUSE	Scamp1	Secretory carrier-associated membrane protein 1 OS=Mus musculus GN=Scamp1 PE=1 SV=1	3	2	10	8	1	7	11	8	2	4	8	8	1	6	9	9
sp|O35609|SCAM3_MOUSE	Scamp3	Secretory carrier-associated membrane protein 3 OS=Mus musculus GN=Scamp3 PE=1 SV=3	0	1	2	1	0	3	0	1	1	1	3	0	0	0	1	0
sp|Q9JKV5|SCAM4_MOUSE	Scamp4	Secretory carrier-associated membrane protein 4 OS=Mus musculus GN=Scamp4 PE=1 SV=1	0	0	0	0	0	0	0	0	0	0	0	0	1	0	0	0
sp|Q9JKD3|SCAM5_MOUSE	Scamp5	Secretory carrier-associated membrane protein 5 OS=Mus musculus GN=Scamp5 PE=1 SV=1	1	0	4	6	0	8	3	5	3	0	4	4	10	0	5	4
sp|Q8R127|SCPDL_MOUSE	Sccpdh	Saccharopine dehydrogenase-like oxidoreductase OS=Mus musculus GN=Sccpdh PE=1 SV=1	0	0	2	1	0	2	0	0	0	0	0	0	0	0	0	0
sp|Q03517|SCG2_MOUSE	Scg2	Secretogranin-2 OS=Mus musculus GN=Scg2 PE=1 SV=1	0	0	0	0	0	3	0	0	0	0	0	0	0	0	0	0
sp|A2APX8|SCN1A_MOUSE	Scn1a	Sodium channel protein type 1 subunit alpha OS=Mus musculus GN=Scn1a PE=1 SV=1	0	0	1	0	0	0	0	0	2	0	0	0	2	0	1	0
tr|B1AWN6|B1AWN6_MOUSE	Scn2a	Sodium channel protein OS=Mus musculus GN=Scn2a PE=1 SV=1	0	0	0	0	0	0	0	0	0	2	0	0	2	0	0	0
sp|Q56A07|SCN2B_MOUSE	Scn2b	Sodium channel subunit beta-2 OS=Mus musculus GN=Scn2b PE=1 SV=1	0	0	0	0	0	2	0	0	0	0	0	0	0	0	0	0
sp|Q9ER60|SCN4A_MOUSE	Scn4a	Sodium channel protein type 4 subunit alpha OS=Mus musculus GN=Scn4a PE=2 SV=1	0	0	1	1	0	1	1	1	0	1	1	1	0	1	0	1
sp|Q9JJV9|SCN5A_MOUSE	Scn5a	Sodium channel protein type 5 subunit alpha OS=Mus musculus GN=Scn5a PE=1 SV=2	1	0	0	0	0	0	0	0	0	0	0	0	0	0	0	0
sp|Q62205|SCN9A_MOUSE	Scn9a	Sodium channel protein type 9 subunit alpha OS=Mus musculus GN=Scn9a PE=1 SV=2	0	0	0	0	0	0	0	0	0	0	0	0	0	0	1	0
sp|Q9CZC8|SCRN1_MOUSE	Scrn1	Secernin-1 OS=Mus musculus GN=Scrn1 PE=1 SV=1	0	0	0	0	0	2	3	0	0	0	3	1	0	0	1	0
sp|Q8K2B3|SDHA_MOUSE	Sdha	Succinate dehydrogenase [ubiquinone] flavoprotein subunit, mitochondrial OS=Mus musculus GN=Sdha PE=1 SV=1	2	7	15	17	1	2	9	10	9	6	7	11	3	0	14	10
sp|Q9CQA3|SDHB_MOUSE	Sdhb	Succinate dehydrogenase [ubiquinone] iron-sulfur subunit, mitochondrial OS=Mus musculus GN=Sdhb PE=1 SV=1	0	5	2	2	0	5	2	1	0	0	0	0	0	0	0	0
sp|Q9CZB0|C560_MOUSE	Sdhc	Succinate dehydrogenase cytochrome b560 subunit, mitochondrial OS=Mus musculus GN=Sdhc PE=1 SV=1	0	0	0	0	0	0	0	1	0	0	0	0	0	0	1	1
sp|Q9CXV1|DHSD_MOUSE	Sdhd	Succinate dehydrogenase [ubiquinone] cytochrome b small subunit, mitochondrial OS=Mus musculus GN=Sdhd PE=1 SV=2	0	0	1	1	0	0	1	1	0	0	1	1	0	0	1	1
sp|Q5M8N4|D39U1_MOUSE	Sdr39u1	Epimerase family protein SDR39U1 OS=Mus musculus GN=Sdr39u1 PE=1 SV=1	0	0	0	0	0	3	0	0	0	0	0	0	0	0	0	0
sp|Q99J08|S14L2_MOUSE	Sec14l2	SEC14-like protein 2 OS=Mus musculus GN=Sec14l2 PE=1 SV=1	0	0	1	0	0	0	0	1	0	0	0	1	0	0	0	3
sp|O08547|SC22B_MOUSE	Sec22b	Vesicle-trafficking protein SEC22b OS=Mus musculus GN=Sec22b PE=1 SV=3	0	5	3	2	0	8	2	3	0	0	3	1	1	2	0	2
sp|Q01405|SC23A_MOUSE	Sec23a	Protein transport protein Sec23A OS=Mus musculus GN=Sec23a PE=1 SV=2	0	0	3	1	0	2	0	0	0	1	1	0	0	0	0	0
tr|Q80ZX0|Q80ZX0_MOUSE	Sec24b	Sec24 related gene family, member B (S. cerevisiae) OS=Mus musculus GN=Sec24b PE=1 SV=1	0	0	0	1	0	0	0	0	0	0	0	0	0	0	0	0
tr|Q80U83|Q80U83_MOUSE	Sec24c	MKIAA0079 protein (Fragment) OS=Mus musculus GN=Sec24c PE=2 SV=1	0	0	1	1	0	0	0	0	0	0	0	0	0	0	0	0
sp|Q8R2U0|SEH1_MOUSE	Seh1l	Nucleoporin SEH1 OS=Mus musculus GN=Seh1l PE=2 SV=1	0	0	0	0	0	0	0	0	0	0	0	0	0	0	1	0
sp|Q8C650|SEP10_MOUSE	Sept10	Septin-10 OS=Mus musculus GN=Sept10 PE=1 SV=1	0	0	0	0	0	0	0	0	0	0	0	0	0	0	3	0
sp|Q8C1B7|SEP11_MOUSE	Sept11	Septin-11 OS=Mus musculus GN=Sept11 PE=1 SV=4	1	9	16	14	3	12	14	15	7	6	10	13	5	2	7	11
sp|P42208|SEPT2_MOUSE	Sept2	Septin-2 OS=Mus musculus GN=Sept2 PE=1 SV=2	0	0	2	3	0	0	0	5	1	0	4	0	0	0	4	0
sp|Q9Z1S5|SEPT3_MOUSE	Sept3	Neuronal-specific septin-3 OS=Mus musculus GN=Sept3 PE=1 SV=2	0	4	4	4	0	9	1	3	1	2	3	4	0	0	4	4
sp|P28661|SEPT4_MOUSE	Sept4	Septin-4 OS=Mus musculus GN=Sept4 PE=1 SV=1	0	0	0	0	0	6	0	0	0	0	0	0	0	0	0	0
sp|Q9Z2Q6|SEPT5_MOUSE	Sept5	Septin-5 OS=Mus musculus GN=Sept5 PE=1 SV=2	0	13	6	5	1	12	2	5	6	1	5	3	2	3	5	6
sp|Q9R1T4|SEPT6_MOUSE	Sept6	Septin-6 OS=Mus musculus GN=Sept6 PE=1 SV=4	4	17	18	12	4	6	11	12	3	0	13	8	3	2	10	8
sp|O55131|SEPT7_MOUSE	Sept7	Septin-7 OS=Mus musculus GN=Sept7 PE=1 SV=1	5	13	7	8	4	9	5	9	4	4	5	7	8	8	7	7
sp|Q8CHH9|SEPT8_MOUSE	Sept8	Septin-8 OS=Mus musculus GN=Sept8 PE=1 SV=4	2	6	7	7	1	14	3	5	2	1	6	3	3	3	5	6
sp|Q80UG5|SEPT9_MOUSE	Sept9	Septin-9 OS=Mus musculus GN=Sept9 PE=1 SV=1	0	0	0	0	0	4	0	0	0	0	0	0	1	0	0	0
sp|Q9CY58|PAIRB_MOUSE	Serbp1	Plasminogen activator inhibitor 1 RNA-binding protein OS=Mus musculus GN=Serbp1 PE=1 SV=2	0	0	0	0	0	6	0	0	2	2	0	0	1	0	0	0
sp|P22599|A1AT2_MOUSE	Serpina1b	Alpha-1-antitrypsin 1-2 OS=Mus musculus GN=Serpina1b PE=1 SV=2	0	0	0	0	0	4	0	0	0	0	0	0	0	0	0	0
sp|Q80X76|SPA3F_MOUSE	Serpina3f	Serine protease inhibitor A3F OS=Mus musculus GN=Serpina3f PE=1 SV=3	0	0	0	0	0	1	0	0	0	0	0	0	0	0	0	1
sp|P07759|SPA3K_MOUSE	Serpina3k	Serine protease inhibitor A3K OS=Mus musculus GN=Serpina3k PE=1 SV=2	0	6	1	2	0	7	0	1	0	0	0	2	2	0	0	0
sp|Q9D154|ILEUA_MOUSE	Serpinb1a	Leukocyte elastase inhibitor A OS=Mus musculus GN=Serpinb1a PE=1 SV=1	0	3	0	1	0	0	0	0	0	0	0	0	0	0	0	0
sp|Q60854|SPB6_MOUSE	Serpinb6	Serpin B6 OS=Mus musculus GN=Serpinb6 PE=1 SV=1	0	0	0	1	0	0	0	1	1	0	2	0	0	0	0	0
sp|P32261|ANT3_MOUSE	Serpinc1	Antithrombin-III OS=Mus musculus GN=Serpinc1 PE=1 SV=1	20	11	17	14	20	10	11	12	9	18	16	11	19	40	13	9
sp|P49182|HEP2_MOUSE	Serpind1	Heparin cofactor 2 OS=Mus musculus GN=Serpind1 PE=1 SV=1	0	0	2	1	0	3	2	1	2	0	2	2	0	4	1	0
sp|Q8VHL1|SETD7_MOUSE	Setd7	Histone-lysine N-methyltransferase SETD7 OS=Mus musculus GN=Setd7 PE=1 SV=2	0	1	0	0	0	2	0	0	0	0	0	0	0	0	0	0
sp|Q921M3|SF3B3_MOUSE	Sf3b3	Splicing factor 3B subunit 3 OS=Mus musculus GN=Sf3b3 PE=1 SV=1	0	0	0	0	0	0	0	1	0	0	0	0	2	0	0	0
sp|O70456|1433S_MOUSE	Sfn	14-3-3 protein sigma OS=Mus musculus GN=Sfn PE=1 SV=2	14	17	8	8	16	21	7	6	7	8	9	9	16	8	6	8
sp|Q8VIJ6|SFPQ_MOUSE	Sfpq	Splicing factor, proline- and glutamine-rich OS=Mus musculus GN=Sfpq PE=1 SV=1	0	0	0	0	0	4	0	0	0	0	0	0	0	0	0	3
sp|Q8VD57|SFT2B_MOUSE	Sft2d2	Vesicle transport protein SFT2B OS=Mus musculus GN=Sft2d2 PE=1 SV=1	1	0	0	0	0	0	0	0	0	0	0	0	0	0	0	0
sp|Q99JR1|SFXN1_MOUSE	Sfxn1	Sideroflexin-1 OS=Mus musculus GN=Sfxn1 PE=1 SV=3	1	1	3	6	0	3	4	3	2	0	2	1	1	2	4	4
sp|Q91V61|SFXN3_MOUSE	Sfxn3	Sideroflexin-3 OS=Mus musculus GN=Sfxn3 PE=1 SV=1	9	17	10	10	9	31	3	13	23	15	7	6	14	13	8	12
sp|Q925N0|SFXN5_MOUSE	Sfxn5	Sideroflexin-5 OS=Mus musculus GN=Sfxn5 PE=1 SV=2	5	4	10	9	4	8	2	12	7	2	5	7	0	5	6	6
sp|Q8VD37|SGIP1_MOUSE	Sgip1	SH3-containing GRB2-like protein 3-interacting protein 1 OS=Mus musculus GN=Sgip1 PE=1 SV=1	0	3	0	0	0	1	0	0	1	0	0	1	0	0	0	2
sp|Q8BPQ7|SGSM1_MOUSE	Sgsm1	Small G protein signaling modulator 1 OS=Mus musculus GN=Sgsm1 PE=1 SV=2	0	0	0	1	0	0	0	0	0	0	0	0	0	0	0	0
sp|Q8BJU0|SGTA_MOUSE	Sgta	Small glutamine-rich tetratricopeptide repeat-containing protein alpha OS=Mus musculus GN=Sgta PE=1 SV=2	0	0	0	0	0	2	0	0	0	0	0	0	0	0	0	0
sp|Q9JJU8|SH3L1_MOUSE	Sh3bgrl	SH3 domain-binding glutamic acid-rich-like protein OS=Mus musculus GN=Sh3bgrl PE=1 SV=1	0	1	0	0	0	3	0	0	0	0	0	0	0	0	0	0
sp|Q91VW3|SH3L3_MOUSE	Sh3bgrl3	SH3 domain-binding glutamic acid-rich-like protein 3 OS=Mus musculus GN=Sh3bgrl3 PE=1 SV=1	0	0	0	1	0	0	1	0	0	0	0	0	0	0	0	0
sp|Q62419|SH3G1_MOUSE	Sh3gl1	Endophilin-A2 OS=Mus musculus GN=Sh3gl1 PE=1 SV=1	0	3	1	1	0	1	2	2	1	0	1	2	1	0	1	0
sp|Q62420|SH3G2_MOUSE	Sh3gl2	Endophilin-A1 OS=Mus musculus GN=Sh3gl2 PE=1 SV=2	0	7	1	1	0	13	2	2	3	0	3	2	2	0	1	1
sp|Q62421|SH3G3_MOUSE	Sh3gl3	Endophilin-A3 OS=Mus musculus GN=Sh3gl3 PE=1 SV=1	0	0	0	0	0	1	0	0	0	0	0	0	0	0	0	0
sp|Q9JK48|SHLB1_MOUSE	Sh3glb1	Endophilin-B1 OS=Mus musculus GN=Sh3glb1 PE=1 SV=1	0	1	0	0	0	0	0	0	0	0	0	0	0	0	0	0
sp|Q8R3V5|SHLB2_MOUSE	Sh3glb2	Endophilin-B2 OS=Mus musculus GN=Sh3glb2 PE=1 SV=2	0	0	0	0	0	2	0	0	0	0	0	0	1	0	0	0
sp|D3YZU1|SHAN1_MOUSE	Shank1	SH3 and multiple ankyrin repeat domains protein 1 OS=Mus musculus GN=Shank1 PE=1 SV=1	0	2	0	0	0	0	0	0	0	0	0	0	0	0	1	0
sp|Q4ACU6|SHAN3_MOUSE	Shank3	SH3 and multiple ankyrin repeat domains protein 3 OS=Mus musculus GN=Shank3 PE=1 SV=3	0	0	4	0	0	4	0	1	0	0	0	0	0	0	0	0
sp|Q6P4S6|SIK3_MOUSE	Sik3	Serine/threonine-protein kinase SIK3 OS=Mus musculus GN=Sik3 PE=1 SV=3	0	2	0	1	0	0	0	1	0	0	0	0	0	0	0	2
sp|P97797|SHPS1_MOUSE	Sirpa	Tyrosine-protein phosphatase non-receptor type substrate 1 OS=Mus musculus GN=Sirpa PE=1 SV=1	1	10	2	2	0	14	3	0	3	1	2	0	1	6	4	3
sp|Q8VDQ8|SIR2_MOUSE	Sirt2	NAD-dependent protein deacetylase sirtuin-2 OS=Mus musculus GN=Sirt2 PE=1 SV=2	0	8	8	5	1	11	6	9	0	2	4	7	2	0	6	7
sp|Q9WTX5|SKP1_MOUSE	Skp1	S-phase kinase-associated protein 1 OS=Mus musculus GN=Skp1 PE=1 SV=3	0	2	0	0	0	6	1	0	0	2	0	1	0	0	1	1
sp|Q3UEZ8|NTCP4_MOUSE	Slc10a4	Sodium/bile acid cotransporter 4 OS=Mus musculus GN=Slc10a4 PE=2 SV=1	0	0	0	0	0	0	0	0	0	0	0	0	0	0	0	1
tr|D3Z0R6|D3Z0R6_MOUSE	Slc11a2	Natural resistance-associated macrophage protein 2 (Fragment) OS=Mus musculus GN=Slc11a2 PE=1 SV=1	0	0	0	0	0	0	0	0	0	0	0	0	0	1	0	0
sp|P55012|S12A2_MOUSE	Slc12a2	Solute carrier family 12 member 2 OS=Mus musculus GN=Slc12a2 PE=1 SV=2	2	1	3	2	0	2	2	1	5	0	1	0	1	0	0	2
sp|Q91V14|S12A5_MOUSE	Slc12a5	Solute carrier family 12 member 5 OS=Mus musculus GN=Slc12a5 PE=1 SV=2	10	13	23	27	8	18	13	20	12	11	20	13	18	11	15	24
sp|P53986|MOT1_MOUSE	Slc16a1	Monocarboxylate transporter 1 OS=Mus musculus GN=Slc16a1 PE=1 SV=1	1	0	0	0	0	5	0	2	4	3	1	2	1	0	0	0
sp|B1AT66|MOT7_MOUSE	Slc16a6	Monocarboxylate transporter 7 OS=Mus musculus GN=Slc16a6 PE=1 SV=1	0	0	0	0	1	0	0	0	0	0	0	0	0	0	0	0
sp|Q8BLE7|VGLU2_MOUSE	Slc17a6	Vesicular glutamate transporter 2 OS=Mus musculus GN=Slc17a6 PE=1 SV=1	0	0	4	5	0	0	0	5	0	0	0	2	0	0	0	4
sp|Q3TXX4|VGLU1_MOUSE	Slc17a7	Vesicular glutamate transporter 1 OS=Mus musculus GN=Slc17a7 PE=1 SV=2	5	0	6	7	4	6	6	5	4	2	4	5	0	5	6	7
sp|P43006|EAA2_MOUSE	Slc1a2	Excitatory amino acid transporter 2 OS=Mus musculus GN=Slc1a2 PE=1 SV=1	13	26	12	12	12	17	11	17	16	12	11	12	12	17	10	13
sp|P56564|EAA1_MOUSE	Slc1a3	Excitatory amino acid transporter 1 OS=Mus musculus GN=Slc1a3 PE=1 SV=2	7	16	15	22	17	10	13	17	15	20	14	12	7	17	12	15
sp|O35874|SATT_MOUSE	Slc1a4	Neutral amino acid transporter A OS=Mus musculus GN=Slc1a4 PE=1 SV=1	7	1	2	3	2	0	3	2	1	2	5	2	2	1	1	2
sp|O35544|EAA4_MOUSE	Slc1a6	Excitatory amino acid transporter 4 OS=Mus musculus GN=Slc1a6 PE=1 SV=1	0	1	4	3	0	0	0	5	0	0	0	3	4	2	1	3
tr|Q14AY1|Q14AY1_MOUSE	Slc24a2	Slc24a2 protein OS=Mus musculus GN=Slc24a2 PE=2 SV=1	0	0	3	4	0	1	0	1	0	0	2	3	0	0	1	0
sp|Q8JZU2|TXTP_MOUSE	Slc25a1	Tricarboxylate transport protein, mitochondrial OS=Mus musculus GN=Slc25a1 PE=1 SV=1	1	3	0	1	0	5	2	2	0	0	1	0	1	1	1	1
sp|Q9QZD8|DIC_MOUSE	Slc25a10	Mitochondrial dicarboxylate carrier OS=Mus musculus GN=Slc25a10 PE=1 SV=2	2	0	0	0	0	1	0	0	0	0	0	0	0	2	0	0
sp|Q9CR62|M2OM_MOUSE	Slc25a11	Mitochondrial 2-oxoglutarate/malate carrier protein OS=Mus musculus GN=Slc25a11 PE=1 SV=3	8	14	11	11	8	17	6	12	9	9	7	9	6	6	11	10
sp|Q8BH59|CMC1_MOUSE	Slc25a12	Calcium-binding mitochondrial carrier protein Aralar1 OS=Mus musculus GN=Slc25a12 PE=1 SV=1	7	12	15	13	6	24	10	22	6	7	12	15	11	13	16	16
sp|Q9QXX4|CMC2_MOUSE	Slc25a13	Calcium-binding mitochondrial carrier protein Aralar2 OS=Mus musculus GN=Slc25a13 PE=1 SV=1	1	4	5	4	0	5	3	4	2	0	2	3	3	0	3	3
sp|Q9DB41|GHC2_MOUSE	Slc25a18	Mitochondrial glutamate carrier 2 OS=Mus musculus GN=Slc25a18 PE=1 SV=4	0	0	1	0	0	0	1	1	0	0	1	1	0	0	0	0
sp|Q9D6M3|GHC1_MOUSE	Slc25a22	Mitochondrial glutamate carrier 1 OS=Mus musculus GN=Slc25a22 PE=1 SV=1	3	18	18	18	6	30	14	16	6	6	16	17	8	3	9	15
sp|Q8VEM8|MPCP_MOUSE	Slc25a3	Phosphate carrier protein, mitochondrial OS=Mus musculus GN=Slc25a3 PE=1 SV=1	11	19	25	23	11	23	17	19	13	7	19	22	10	17	21	22
sp|P48962|ADT1_MOUSE	Slc25a4	ADP/ATP translocase 1 OS=Mus musculus GN=Slc25a4 PE=1 SV=4	15	35	37	32	35	42	23	30	34	17	27	30	29	26	31	30
sp|Q9CQS4|S2546_MOUSE	Slc25a46	Solute carrier family 25 member 46 OS=Mus musculus GN=Slc25a46 PE=1 SV=1	0	0	3	0	0	0	0	0	0	0	0	0	0	0	1	0
sp|P51881|ADT2_MOUSE	Slc25a5	ADP/ATP translocase 2 OS=Mus musculus GN=Slc25a5 PE=1 SV=3	18	10	7	5	5	7	7	8	6	4	6	6	6	22	5	6
sp|Q60714|S27A1_MOUSE	Slc27a1	Long-chain fatty acid transport protein 1 OS=Mus musculus GN=Slc27a1 PE=1 SV=1	0	0	0	0	0	0	0	0	0	0	0	0	0	0	1	0
sp|Q91VE0|S27A4_MOUSE	Slc27a4	Long-chain fatty acid transport protein 4 OS=Mus musculus GN=Slc27a4 PE=1 SV=1	0	0	0	2	0	0	0	0	0	0	0	0	0	0	0	0
sp|P17809|GTR1_MOUSE	Slc2a1	Solute carrier family 2, facilitated glucose transporter member 1 OS=Mus musculus GN=Slc2a1 PE=1 SV=4	1	1	0	1	1	6	1	2	0	3	0	0	4	0	2	0
sp|Q3UHK1|MYCT_MOUSE	Slc2a13	Proton myo-inositol cotransporter OS=Mus musculus GN=Slc2a13 PE=1 SV=2	0	0	1	2	0	0	0	2	2	2	1	1	0	0	0	1
sp|P32037|GTR3_MOUSE	Slc2a3	Solute carrier family 2, facilitated glucose transporter member 3 OS=Mus musculus GN=Slc2a3 PE=1 SV=1	2	6	5	3	1	6	2	8	6	2	5	5	0	0	5	5
sp|P97441|ZNT3_MOUSE	Slc30a3	Zinc transporter 3 OS=Mus musculus GN=Slc30a3 PE=1 SV=1	0	1	2	2	0	0	0	1	1	2	0	0	0	0	2	1
sp|O35633|VIAAT_MOUSE	Slc32a1	Vesicular inhibitory amino acid transporter OS=Mus musculus GN=Slc32a1 PE=1 SV=3	2	0	3	5	0	2	4	5	1	5	6	3	2	3	2	3
sp|D3YVE8|S35G2_MOUSE	Slc35g2	Solute carrier family 35 member G2 OS=Mus musculus GN=Slc35g2 PE=1 SV=1	0	0	0	0	0	0	0	0	0	0	0	1	0	0	0	0
sp|Q9DCP2|S38A3_MOUSE	Slc38a3	Sodium-coupled neutral amino acid transporter 3 OS=Mus musculus GN=Slc38a3 PE=1 SV=1	0	1	0	0	0	0	0	0	0	1	0	0	0	1	0	0
sp|Q8C145|S39A6_MOUSE	Slc39a6	Zinc transporter ZIP6 OS=Mus musculus GN=Slc39a6 PE=1 SV=1	1	0	0	0	0	0	0	0	0	0	0	0	0	0	0	0
sp|P10852|4F2_MOUSE	Slc3a2	4F2 cell-surface antigen heavy chain OS=Mus musculus GN=Slc3a2 PE=1 SV=1	2	10	7	6	3	14	5	7	5	1	9	6	1	0	6	8
sp|Q6X893|CTL1_MOUSE	Slc44a1	Choline transporter-like protein 1 OS=Mus musculus GN=Slc44a1 PE=1 SV=3	0	0	2	1	0	0	0	2	0	0	0	0	0	0	2	2
tr|A0A1L1SS87|A0A1L1SS87_MOUSE	Slc44a2	Choline transporter-like protein 2 (Fragment) OS=Mus musculus GN=Slc44a2 PE=3 SV=1	0	0	0	0	0	1	0	0	1	0	0	0	0	0	0	0
sp|Q5DTL9|S4A10_MOUSE	Slc4a10	Sodium-driven chloride bicarbonate exchanger OS=Mus musculus GN=Slc4a10 PE=1 SV=2	0	0	0	0	0	1	1	0	1	0	1	0	1	0	2	1
sp|O88343|S4A4_MOUSE	Slc4a4	Electrogenic sodium bicarbonate cotransporter 1 OS=Mus musculus GN=Slc4a4 PE=1 SV=2	3	5	7	8	6	6	6	7	4	4	4	7	10	3	7	8
sp|Q8JZR6|S4A8_MOUSE	Slc4a8	Electroneutral sodium bicarbonate exchanger 1 OS=Mus musculus GN=Slc4a8 PE=2 SV=1	0	0	0	0	0	1	0	1	0	0	0	0	0	0	0	0
sp|P31648|SC6A1_MOUSE	Slc6a1	Sodium- and chloride-dependent GABA transporter 1 OS=Mus musculus GN=Slc6a1 PE=1 SV=2	2	0	7	7	3	0	5	5	4	2	6	3	0	0	3	5
sp|P31650|S6A11_MOUSE	Slc6a11	Sodium- and chloride-dependent GABA transporter 3 OS=Mus musculus GN=Slc6a11 PE=1 SV=2	3	3	6	5	3	8	7	7	6	5	6	6	0	6	6	4
sp|Q8BJI1|S6A17_MOUSE	Slc6a17	Sodium-dependent neutral amino acid transporter SLC6A17 OS=Mus musculus GN=Slc6a17 PE=1 SV=1	1	6	6	3	2	0	5	3	1	4	4	3	0	2	3	5
sp|Q6PGE7|SC6A7_MOUSE	Slc6a7	Sodium-dependent proline transporter OS=Mus musculus GN=Slc6a7 PE=1 SV=1	0	3	1	1	0	0	0	2	1	0	2	2	2	3	0	0
sp|P28571|SC6A9_MOUSE	Slc6a9	Sodium- and chloride-dependent glycine transporter 1 OS=Mus musculus GN=Slc6a9 PE=1 SV=3	0	1	0	0	5	0	0	0	0	0	2	0	0	1	0	0
sp|Q9WTR6|XCT_MOUSE	Slc7a11	Cystine/glutamate transporter OS=Mus musculus GN=Slc7a11 PE=1 SV=1	0	0	2	2	0	1	1	3	0	1	0	1	0	0	2	0
sp|Q8BXR1|S7A14_MOUSE	Slc7a14	Probable cationic amino acid transporter OS=Mus musculus GN=Slc7a14 PE=1 SV=1	0	0	1	0	0	0	0	0	0	0	0	1	1	0	0	0
sp|Q9Z127|LAT1_MOUSE	Slc7a5	Large neutral amino acids transporter small subunit 1 OS=Mus musculus GN=Slc7a5 PE=1 SV=2	0	0	1	0	0	0	0	1	0	1	0	1	0	2	1	0
sp|P70414|NAC1_MOUSE	Slc8a1	Sodium/calcium exchanger 1 OS=Mus musculus GN=Slc8a1 PE=1 SV=1	0	2	6	4	0	2	2	2	1	0	0	2	1	1	5	3
sp|Q8K596|NAC2_MOUSE	Slc8a2	Sodium/calcium exchanger 2 OS=Mus musculus GN=Slc8a2 PE=1 SV=1	3	10	12	15	8	12	5	11	6	5	12	9	7	9	10	13
sp|Q61165|SL9A1_MOUSE	Slc9a1	Sodium/hydrogen exchanger 1 OS=Mus musculus GN=Slc9a1 PE=1 SV=1	0	0	1	1	0	2	0	2	1	1	2	3	0	0	2	2
sp|P70441|NHRF1_MOUSE	Slc9a3r1	Na(+)/H(+) exchange regulatory cofactor NHE-RF1 OS=Mus musculus GN=Slc9a3r1 PE=1 SV=3	0	0	0	0	0	5	0	0	1	0	0	0	0	0	0	0
sp|Q9JHL1|NHRF2_MOUSE	Slc9a3r2	Na(+)/H(+) exchange regulatory cofactor NHE-RF2 OS=Mus musculus GN=Slc9a3r2 PE=1 SV=2	2	2	0	0	1	0	0	0	0	0	0	0	1	5	0	0
sp|Q9D8T7|SLIRP_MOUSE	Slirp	SRA stem-loop-interacting RNA-binding protein, mitochondrial OS=Mus musculus GN=Slirp PE=1 SV=2	0	0	0	0	0	1	0	0	0	0	0	0	0	0	0	0
sp|O54988|SLK_MOUSE	Slk	STE20-like serine/threonine-protein kinase OS=Mus musculus GN=Slk PE=1 SV=2	0	1	0	0	0	0	0	0	0	0	0	0	0	0	0	0
sp|Q91VZ6|SMAP1_MOUSE	Smap1	Stromal membrane-associated protein 1 OS=Mus musculus GN=Smap1 PE=1 SV=1	0	0	2	0	0	2	1	0	0	1	0	0	0	0	0	0
sp|Q7TN29|SMAP2_MOUSE	Smap2	Stromal membrane-associated protein 2 OS=Mus musculus GN=Smap2 PE=1 SV=1	0	0	1	1	0	0	0	0	0	0	0	0	0	0	0	1
sp|Q8BGT7|SPF30_MOUSE	Smndc1	Survival of motor neuron-related-splicing factor 30 OS=Mus musculus GN=Smndc1 PE=1 SV=1	0	0	0	0	0	2	0	0	0	0	0	0	0	0	0	0
sp|Q9JJY3|NSMA2_MOUSE	Smpd3	Sphingomyelin phosphodiesterase 3 OS=Mus musculus GN=Smpd3 PE=1 SV=1	0	0	2	2	0	0	2	3	0	0	1	2	0	0	2	1
sp|Q8BTK5|SMYD4_MOUSE	Smyd4	SET and MYND domain-containing protein 4 OS=Mus musculus GN=Smyd4 PE=2 SV=2	0	0	0	0	0	0	0	0	0	0	1	0	0	0	0	0
sp|O09044|SNP23_MOUSE	Snap23	Synaptosomal-associated protein 23 OS=Mus musculus GN=Snap23 PE=1 SV=1	0	2	1	0	0	0	1	1	0	1	0	1	0	1	1	2
sp|P60879|SNP25_MOUSE	Snap25	Synaptosomal-associated protein 25 OS=Mus musculus GN=Snap25 PE=1 SV=1	4	28	11	13	11	55	18	11	8	15	12	13	15	10	11	9
sp|Q8R570|SNP47_MOUSE	Snap47	Synaptosomal-associated protein 47 OS=Mus musculus GN=Snap47 PE=1 SV=1	4	6	3	2	1	1	1	5	4	1	4	2	2	3	3	4
sp|Q61548|AP180_MOUSE	Snap91	Clathrin coat assembly protein AP180 OS=Mus musculus GN=Snap91 PE=1 SV=1	3	19	6	4	4	6	1	8	7	1	3	5	7	0	6	7
sp|Q8BP86|SNPC4_MOUSE	Snapc4	snRNA-activating protein complex subunit 4 OS=Mus musculus GN=Snapc4 PE=1 SV=2	1	0	0	0	0	0	0	0	0	2	0	0	0	0	0	0
sp|O55042|SYUA_MOUSE	Snca	Alpha-synuclein OS=Mus musculus GN=Snca PE=1 SV=2	0	19	0	0	5	24	8	0	3	1	0	3	4	0	0	0
sp|Q91ZZ3|SYUB_MOUSE	Sncb	Beta-synuclein OS=Mus musculus GN=Sncb PE=1 SV=1	7	6	1	1	2	3	2	1	2	0	1	2	0	0	1	1
sp|Q9Z0F7|SYUG_MOUSE	Sncg	Gamma-synuclein OS=Mus musculus GN=Sncg PE=1 SV=1	0	5	0	0	1	3	0	0	0	0	0	0	0	0	0	0
sp|Q80U23|SNPH_MOUSE	Snph	Syntaphilin OS=Mus musculus GN=Snph PE=1 SV=3	0	0	0	0	0	1	0	0	0	0	0	0	0	0	0	0
sp|P27048|RSMB_MOUSE	Snrpb	Small nuclear ribonucleoprotein-associated protein B OS=Mus musculus GN=Snrpb PE=1 SV=1	0	0	2	1	0	0	1	0	0	0	0	0	0	0	0	1
sp|P62317|SMD2_MOUSE	Snrpd2	Small nuclear ribonucleoprotein Sm D2 OS=Mus musculus GN=Snrpd2 PE=1 SV=1	0	5	0	0	0	0	0	0	0	0	0	0	0	0	0	0
sp|P62320|SMD3_MOUSE	Snrpd3	Small nuclear ribonucleoprotein Sm D3 OS=Mus musculus GN=Snrpd3 PE=1 SV=1	0	5	0	0	0	1	0	0	0	0	0	0	0	0	0	0
sp|P62305|RUXE_MOUSE	Snrpe	Small nuclear ribonucleoprotein E OS=Mus musculus GN=Snrpe PE=1 SV=1	0	0	0	0	0	1	0	0	0	0	0	0	0	1	0	0
sp|P62307|RUXF_MOUSE	Snrpf	Small nuclear ribonucleoprotein F OS=Mus musculus GN=Snrpf PE=1 SV=1	0	0	0	0	1	1	0	0	0	1	0	0	1	0	0	0
sp|Q9CWK8|SNX2_MOUSE	Snx2	Sorting nexin-2 OS=Mus musculus GN=Snx2 PE=1 SV=2	0	0	0	0	0	3	0	0	0	0	0	0	0	0	0	0
sp|Q3UHD6|SNX27_MOUSE	Snx27	Sorting nexin-27 OS=Mus musculus GN=Snx27 PE=1 SV=2	0	0	3	0	0	1	2	2	0	0	1	0	0	0	2	0
sp|O70492|SNX3_MOUSE	Snx3	Sorting nexin-3 OS=Mus musculus GN=Snx3 PE=1 SV=3	0	0	0	0	0	1	0	0	0	0	0	0	0	0	0	0
sp|P08228|SODC_MOUSE	Sod1	Superoxide dismutase [Cu-Zn] OS=Mus musculus GN=Sod1 PE=1 SV=2	4	6	6	4	3	11	5	7	9	11	6	4	0	3	8	8
sp|P09671|SODM_MOUSE	Sod2	Superoxide dismutase [Mn], mitochondrial OS=Mus musculus GN=Sod2 PE=1 SV=3	0	5	0	0	1	22	1	0	0	0	0	0	0	1	0	1
sp|Q6NZL0|SOGA3_MOUSE	Soga3	Protein SOGA3 OS=Mus musculus GN=Soga3 PE=1 SV=2	0	0	0	0	0	3	0	0	0	0	0	0	0	0	0	0
sp|Q64442|DHSO_MOUSE	Sord	Sorbitol dehydrogenase OS=Mus musculus GN=Sord PE=1 SV=3	0	0	0	0	0	0	0	0	0	0	1	0	0	0	1	0
sp|Q9D552|SPT17_MOUSE	Spata17	Spermatogenesis-associated protein 17 OS=Mus musculus GN=Spata17 PE=2 SV=1	0	0	0	0	0	0	0	0	0	0	0	0	3	0	0	0
tr|Q3TER3|Q3TER3_MOUSE	Spata5l1	Putative uncharacterized protein OS=Mus musculus GN=Spata5l1 PE=2 SV=1	0	0	0	0	0	0	0	0	0	0	0	0	0	0	1	0
sp|Q9CYN2|SPCS2_MOUSE	Spcs2	Signal peptidase complex subunit 2 OS=Mus musculus GN=Spcs2 PE=1 SV=1	0	1	0	0	0	0	0	0	0	0	0	0	0	0	0	0
sp|Q64105|SPRE_MOUSE	Spr	Sepiapterin reductase OS=Mus musculus GN=Spr PE=1 SV=1	0	0	0	0	0	5	0	0	0	0	0	0	0	0	0	1
sp|P16546|SPTN1_MOUSE	Sptan1	Spectrin alpha chain, non-erythrocytic 1 OS=Mus musculus GN=Sptan1 PE=1 SV=4	17	55	59	37	13	55	52	22	32	33	36	42	24	22	54	49
sp|Q62261|SPTB2_MOUSE	Sptbn1	Spectrin beta chain, non-erythrocytic 1 OS=Mus musculus GN=Sptbn1 PE=1 SV=2	8	37	39	33	5	37	23	21	15	7	23	33	12	16	32	34
tr|Q68FG2|Q68FG2_MOUSE	Sptbn2	Spectrin beta chain OS=Mus musculus GN=Sptbn2 PE=1 SV=1	2	3	9	10	0	6	8	0	1	0	3	6	1	1	6	7
sp|Q99MY0|SPZ1_MOUSE	Spz1	Spermatogenic leucine zipper protein 1 OS=Mus musculus GN=Spz1 PE=1 SV=1	0	0	0	0	0	0	0	0	0	0	0	0	0	0	2	0
sp|P05480|SRC_MOUSE	Src	Neuronal proto-oncogene tyrosine-protein kinase Src OS=Mus musculus GN=Src PE=1 SV=4	0	0	3	4	2	5	2	3	1	0	4	1	0	0	1	2
sp|Q9QWI6|SRCN1_MOUSE	Srcin1	SRC kinase signaling inhibitor 1 OS=Mus musculus GN=Srcin1 PE=1 SV=2	0	6	1	1	0	4	1	0	0	0	2	2	2	0	1	0
sp|P47758|SRPRB_MOUSE	Srprb	Signal recognition particle receptor subunit beta OS=Mus musculus GN=Srprb PE=1 SV=1	0	0	0	0	0	0	0	0	1	0	0	0	0	0	0	0
sp|Q9QZX7|SRR_MOUSE	Srr	Serine racemase OS=Mus musculus GN=Srr PE=1 SV=1	0	1	2	2	0	3	0	3	0	0	0	1	1	0	0	1
sp|Q62093|SRSF2_MOUSE	Srsf2	Serine/arginine-rich splicing factor 2 OS=Mus musculus GN=Srsf2 PE=1 SV=4	0	0	0	0	0	1	0	0	0	0	0	0	0	0	0	0
sp|O35326|SRSF5_MOUSE	Srsf5	Serine/arginine-rich splicing factor 5 OS=Mus musculus GN=Srsf5 PE=1 SV=2	0	2	0	0	0	2	0	0	0	0	0	0	0	0	0	0
sp|Q9CYR0|SSBP_MOUSE	Ssbp1	Single-stranded DNA-binding protein, mitochondrial OS=Mus musculus GN=Ssbp1 PE=1 SV=1	0	0	0	0	0	3	0	0	0	0	0	0	0	0	0	0
sp|Q62186|SSRD_MOUSE	Ssr4	Translocon-associated protein subunit delta OS=Mus musculus GN=Ssr4 PE=1 SV=1	0	0	2	1	0	1	0	2	1	0	0	0	0	0	2	2
sp|Q99L47|F10A1_MOUSE	St13	Hsc70-interacting protein OS=Mus musculus GN=St13 PE=1 SV=1	0	0	0	0	0	2	0	0	0	0	0	0	0	0	0	0
sp|Q60864|STIP1_MOUSE	Stip1	Stress-induced-phosphoprotein 1 OS=Mus musculus GN=Stip1 PE=1 SV=1	0	7	3	3	0	9	3	0	0	0	1	2	0	0	1	3
sp|P54227|STMN1_MOUSE	Stmn1	Stathmin OS=Mus musculus GN=Stmn1 PE=1 SV=2	0	0	0	0	0	7	0	0	0	0	0	0	0	0	0	0
sp|Q9Z1Z2|STRAP_MOUSE	Strap	Serine-threonine kinase receptor-associated protein OS=Mus musculus GN=Strap PE=1 SV=2	0	5	6	8	3	3	3	7	1	0	8	6	3	1	4	6
sp|O55106|STRN_MOUSE	Strn	Striatin OS=Mus musculus GN=Strn PE=1 SV=2	0	0	0	0	0	3	0	0	0	0	0	0	0	0	0	0
sp|P58404|STRN4_MOUSE	Strn4	Striatin-4 OS=Mus musculus GN=Strn4 PE=1 SV=2	0	0	0	0	0	1	0	0	0	0	0	0	0	0	0	0
sp|Q0VBF8|STUM_MOUSE	Stum	Protein stum homolog OS=Mus musculus GN=Stum PE=1 SV=1	0	0	1	1	0	2	1	1	1	0	1	0	0	0	1	1
sp|Q9ER00|STX12_MOUSE	Stx12	Syntaxin-12 OS=Mus musculus GN=Stx12 PE=1 SV=1	0	0	0	0	0	1	0	0	0	0	0	0	0	0	0	0
sp|O35526|STX1A_MOUSE	Stx1a	Syntaxin-1A OS=Mus musculus GN=Stx1a PE=1 SV=3	3	10	1	2	0	15	2	2	1	3	0	0	1	1	1	2
sp|P61264|STX1B_MOUSE	Stx1b	Syntaxin-1B OS=Mus musculus GN=Stx1b PE=1 SV=1	3	21	8	9	15	22	10	6	9	6	7	8	4	1	8	12
sp|O70439|STX7_MOUSE	Stx7	Syntaxin-7 OS=Mus musculus GN=Stx7 PE=1 SV=3	0	0	0	0	0	1	0	0	0	0	0	0	0	0	0	0
sp|O08599|STXB1_MOUSE	Stxbp1	Syntaxin-binding protein 1 OS=Mus musculus GN=Stxbp1 PE=1 SV=2	27	83	44	36	20	36	28	48	20	33	30	35	23	28	35	43
sp|Q8K400|STXB5_MOUSE	Stxbp5	Syntaxin-binding protein 5 OS=Mus musculus GN=Stxbp5 PE=1 SV=3	0	0	0	3	0	0	0	3	0	0	1	0	0	1	0	3
sp|Q5DQR4|STB5L_MOUSE	Stxbp5l	Syntaxin-binding protein 5-like OS=Mus musculus GN=Stxbp5l PE=1 SV=1	0	0	3	4	0	1	1	2	0	0	0	2	0	0	3	3
sp|Q9Z2I9|SUCB1_MOUSE	Sucla2	Succinate--CoA ligase [ADP-forming] subunit beta, mitochondrial OS=Mus musculus GN=Sucla2 PE=1 SV=2	6	14	10	12	3	30	7	13	5	6	10	9	13	12	8	17
sp|Q9WUM5|SUCA_MOUSE	Suclg1	Succinate--CoA ligase [ADP/GDP-forming] subunit alpha, mitochondrial OS=Mus musculus GN=Suclg1 PE=1 SV=4	5	8	5	4	2	11	5	8	2	1	4	5	0	5	3	4
sp|Q9Z2I8|SUCB2_MOUSE	Suclg2	Succinate--CoA ligase [GDP-forming] subunit beta, mitochondrial OS=Mus musculus GN=Suclg2 PE=1 SV=3	0	3	0	0	0	2	0	0	0	0	0	0	0	0	0	0
sp|Q9CX34|SGT1_MOUSE	Sugt1	Protein SGT1 homolog OS=Mus musculus GN=Sugt1 PE=1 SV=3	0	4	0	0	0	3	0	0	0	0	0	0	0	0	1	0
sp|P63046|ST4A1_MOUSE	Sult4a1	Sulfotransferase 4A1 OS=Mus musculus GN=Sult4a1 PE=1 SV=1	0	1	0	0	0	3	0	0	0	0	0	0	0	0	0	0
sp|Q9Z172|SUMO3_MOUSE	Sumo3	Small ubiquitin-related modifier 3 OS=Mus musculus GN=Sumo3 PE=1 SV=1	0	1	0	0	0	0	0	0	0	0	0	0	0	0	0	0
sp|Q920B9|SP16H_MOUSE	Supt16h	FACT complex subunit SPT16 OS=Mus musculus GN=Supt16h PE=1 SV=2	0	0	0	0	0	1	0	0	0	0	0	0	0	0	0	0
sp|Q9JIS5|SV2A_MOUSE	Sv2a	Synaptic vesicle glycoprotein 2A OS=Mus musculus GN=Sv2a PE=1 SV=1	6	10	15	19	4	10	10	17	10	10	13	15	1	3	15	18
sp|Q8BG39|SV2B_MOUSE	Sv2b	Synaptic vesicle glycoprotein 2B OS=Mus musculus GN=Sv2b PE=1 SV=1	1	0	10	11	0	13	10	8	3	0	10	9	4	2	9	8
sp|Q69ZS6|SV2C_MOUSE	Sv2c	Synaptic vesicle glycoprotein 2C OS=Mus musculus GN=Sv2c PE=1 SV=2	0	0	1	0	0	0	0	0	0	0	0	0	0	0	1	1
sp|Q3UZP4|SVIP_MOUSE	Svip	Small VCP/p97-interacting protein OS=Mus musculus GN=Svip PE=3 SV=1	0	1	0	1	0	3	2	0	0	0	1	0	0	0	0	0
sp|Q8BFT9|SVOP_MOUSE	Svop	Synaptic vesicle 2-related protein OS=Mus musculus GN=Svop PE=1 SV=1	0	0	0	2	0	0	0	0	0	0	0	1	0	0	0	0
sp|O88935|SYN1_MOUSE	Syn1	Synapsin-1 OS=Mus musculus GN=Syn1 PE=1 SV=2	5	57	28	32	5	38	19	25	8	6	25	29	12	5	28	30
sp|Q64332|SYN2_MOUSE	Syn2	Synapsin-2 OS=Mus musculus GN=Syn2 PE=1 SV=2	3	24	20	17	5	23	12	25	19	6	12	15	12	4	13	29
sp|Q8JZP2|SYN3_MOUSE	Syn3	Synapsin-3 OS=Mus musculus GN=Syn3 PE=1 SV=2	0	0	0	3	0	2	1	3	0	0	3	0	1	0	0	2
sp|F6SEU4|SYGP1_MOUSE	Syngap1	Ras/Rap GTPase-activating protein SynGAP OS=Mus musculus GN=Syngap1 PE=1 SV=2	0	0	0	0	0	1	0	0	0	0	0	0	0	0	0	1
sp|O55100|SNG1_MOUSE	Syngr1	Synaptogyrin-1 OS=Mus musculus GN=Syngr1 PE=1 SV=2	8	6	3	3	2	2	4	3	0	3	3	3	4	4	3	3
sp|Q8R191|SNG3_MOUSE	Syngr3	Synaptogyrin-3 OS=Mus musculus GN=Syngr3 PE=1 SV=1	4	5	4	4	2	3	4	4	3	4	3	3	1	3	4	4
sp|Q8CHC4|SYNJ1_MOUSE	Synj1	Synaptojanin-1 OS=Mus musculus GN=Synj1 PE=1 SV=3	8	14	41	38	9	23	22	36	22	15	31	35	17	19	27	36
sp|Q9D6K5|SYJ2B_MOUSE	Synj2bp	Synaptojanin-2-binding protein OS=Mus musculus GN=Synj2bp PE=1 SV=1	0	0	0	0	0	2	0	0	0	0	0	0	0	0	0	0
sp|Q8CC35|SYNPO_MOUSE	Synpo	Synaptopodin OS=Mus musculus GN=Synpo PE=1 SV=2	0	2	3	3	0	11	2	0	0	0	0	3	0	0	4	3
sp|Q62277|SYPH_MOUSE	Syp	Synaptophysin OS=Mus musculus GN=Syp PE=1 SV=2	4	3	5	7	12	10	3	5	6	4	4	4	8	2	4	5
sp|P46096|SYT1_MOUSE	Syt1	Synaptotagmin-1 OS=Mus musculus GN=Syt1 PE=1 SV=1	12	40	15	19	7	42	8	15	8	10	12	10	8	9	11	13
sp|P46097|SYT2_MOUSE	Syt2	Synaptotagmin-2 OS=Mus musculus GN=Syt2 PE=1 SV=1	0	1	1	2	0	3	1	0	0	0	0	1	0	0	0	3
sp|Q9R0N7|SYT7_MOUSE	Syt7	Synaptotagmin-7 OS=Mus musculus GN=Syt7 PE=1 SV=1	0	3	4	5	0	2	1	3	0	1	2	2	0	3	2	4
sp|Q9WVA4|TAGL2_MOUSE	Tagln2	Transgelin-2 OS=Mus musculus GN=Tagln2 PE=1 SV=4	0	0	0	1	1	2	0	0	0	0	0	0	0	0	0	0
sp|Q9R1Q8|TAGL3_MOUSE	Tagln3	Transgelin-3 OS=Mus musculus GN=Tagln3 PE=1 SV=1	0	2	0	1	0	9	0	0	1	0	1	1	0	0	2	2
sp|Q93092|TALDO_MOUSE	Taldo1	Transaldolase OS=Mus musculus GN=Taldo1 PE=1 SV=2	0	2	2	3	0	0	2	4	0	0	1	4	0	0	3	3
tr|Q3UZM3|Q3UZM3_MOUSE	Tango2	Putative uncharacterized protein OS=Mus musculus GN=Tango2 PE=2 SV=1	0	0	0	0	0	0	0	0	0	0	0	0	0	0	0	1
sp|Q921F2|TADBP_MOUSE	Tardbp	TAR DNA-binding protein 43 OS=Mus musculus GN=Tardbp PE=1 SV=1	0	0	1	2	0	1	1	1	1	0	1	0	0	0	1	2
sp|Q3UUG6|TBC24_MOUSE	Tbc1d24	TBC1 domain family member 24 OS=Mus musculus GN=Tbc1d24 PE=1 SV=2	0	0	2	3	0	0	1	1	0	0	1	3	1	0	1	2
sp|Q9D1E6|TBCB_MOUSE	Tbcb	Tubulin-folding cofactor B OS=Mus musculus GN=Tbcb PE=1 SV=2	0	0	0	0	0	0	0	1	0	0	0	0	0	0	0	1
sp|Q8BYA0|TBCD_MOUSE	Tbcd	Tubulin-specific chaperone D OS=Mus musculus GN=Tbcd PE=1 SV=1	0	0	0	0	0	1	0	0	0	0	0	0	0	0	0	0
sp|Q8CCT4|TCAL5_MOUSE	Tceal5	Transcription elongation factor A protein-like 5 OS=Mus musculus GN=Tceal5 PE=1 SV=1	0	0	0	0	0	4	2	0	1	0	0	0	0	0	0	0
sp|P11983|TCPA_MOUSE	Tcp1	T-complex protein 1 subunit alpha OS=Mus musculus GN=Tcp1 PE=1 SV=3	0	9	10	10	0	10	6	11	5	4	10	9	6	4	10	8
tr|Q8C641|Q8C641_MOUSE	Tcp10c	ENSMUSG00000052469 protein OS=Mus musculus GN=Tcp10c PE=2 SV=1	0	0	0	0	0	0	1	0	0	0	0	0	0	0	0	0
sp|Q80VP0|TCPR1_MOUSE	Tecpr1	Tectonin beta-propeller repeat-containing protein 1 OS=Mus musculus GN=Tecpr1 PE=1 SV=1	0	0	2	2	0	3	1	0	0	0	2	1	0	0	1	1
sp|Q9CY27|TECR_MOUSE	Tecr	Very-long-chain enoyl-CoA reductase OS=Mus musculus GN=Tecr PE=1 SV=1	0	4	2	6	0	0	1	5	0	1	0	3	0	2	2	3
sp|Q921I1|TRFE_MOUSE	Tf	Serotransferrin OS=Mus musculus GN=Tf PE=1 SV=1	0	0	0	2	0	0	1	0	0	0	0	0	0	0	0	0
tr|B8JJG7|B8JJG7_MOUSE	Tfg	Trk-fused gene (Fragment) OS=Mus musculus GN=Tfg PE=1 SV=1	0	0	0	0	0	0	0	0	0	0	0	0	0	0	0	1
sp|Q62351|TFR1_MOUSE	Tfrc	Transferrin receptor protein 1 OS=Mus musculus GN=Tfrc PE=1 SV=1	0	0	0	0	0	0	0	0	0	0	0	0	0	0	1	1
sp|Q3UUI3|THEM4_MOUSE	Them4	Acyl-coenzyme A thioesterase THEM4 OS=Mus musculus GN=Them4 PE=1 SV=1	0	0	1	1	0	0	0	0	0	0	0	0	0	0	0	0
sp|Q8C1A5|THOP1_MOUSE	Thop1	Thimet oligopeptidase OS=Mus musculus GN=Thop1 PE=1 SV=1	0	0	0	0	0	0	0	0	0	0	0	1	0	0	0	1
sp|P01831|THY1_MOUSE	Thy1	Thy-1 membrane glycoprotein OS=Mus musculus GN=Thy1 PE=1 SV=1	0	5	0	2	0	3	3	0	0	0	1	2	0	0	2	2
sp|P70318|TIAR_MOUSE	Tial1	Nucleolysin TIAR OS=Mus musculus GN=Tial1 PE=1 SV=1	0	1	0	0	0	0	0	0	0	0	0	0	0	0	0	0
sp|Q6ZPF3|TIAM2_MOUSE	Tiam2	T-lymphoma invasion and metastasis-inducing protein 2 OS=Mus musculus GN=Tiam2 PE=1 SV=2	0	0	0	1	0	0	1	1	0	0	1	1	0	0	0	1
sp|P62073|TIM10_MOUSE	Timm10	Mitochondrial import inner membrane translocase subunit Tim10 OS=Mus musculus GN=Timm10 PE=1 SV=1	0	1	0	0	0	0	0	0	0	0	0	0	0	0	0	0
sp|P62075|TIM13_MOUSE	Timm13	Mitochondrial import inner membrane translocase subunit Tim13 OS=Mus musculus GN=Timm13 PE=1 SV=1	0	0	0	0	0	4	0	0	0	0	0	0	0	0	0	0
sp|Q9Z0V7|TI17B_MOUSE	Timm17b	Mitochondrial import inner membrane translocase subunit Tim17-B OS=Mus musculus GN=Timm17b PE=1 SV=1	0	0	0	0	0	0	0	0	0	0	0	1	0	0	0	0
sp|Q9CQ85|TIM22_MOUSE	Timm22	Mitochondrial import inner membrane translocase subunit Tim22 OS=Mus musculus GN=Timm22 PE=1 SV=1	0	0	1	0	0	1	0	1	1	1	1	0	0	0	0	1
sp|Q9WTQ8|TIM23_MOUSE	Timm23	Mitochondrial import inner membrane translocase subunit Tim23 OS=Mus musculus GN=Timm23 PE=1 SV=1	0	0	0	2	0	0	0	0	0	0	0	0	0	0	0	0
sp|O35857|TIM44_MOUSE	Timm44	Mitochondrial import inner membrane translocase subunit TIM44 OS=Mus musculus GN=Timm44 PE=1 SV=2	0	1	2	1	0	0	0	1	0	0	0	0	0	0	1	3
sp|Q9WV98|TIM9_MOUSE	Timm9	Mitochondrial import inner membrane translocase subunit Tim9 OS=Mus musculus GN=Timm9 PE=1 SV=1	0	0	0	0	0	1	0	0	0	0	0	0	0	0	0	0
sp|P39876|TIMP3_MOUSE	Timp3	Metalloproteinase inhibitor 3 OS=Mus musculus GN=Timp3 PE=1 SV=1	0	0	0	0	0	1	0	0	1	0	0	0	0	0	0	0
sp|P40142|TKT_MOUSE	Tkt	Transketolase OS=Mus musculus GN=Tkt PE=1 SV=1	3	12	29	19	0	21	19	24	3	3	15	16	6	5	18	17
sp|Q71LX4|TLN2_MOUSE	Tln2	Talin-2 OS=Mus musculus GN=Tln2 PE=1 SV=3	0	0	0	0	0	4	1	1	0	0	0	0	0	0	1	0
sp|Q9D1D4|TMEDA_MOUSE	Tmed10	Transmembrane emp24 domain-containing protein 10 OS=Mus musculus GN=Tmed10 PE=1 SV=1	0	0	1	0	0	0	0	0	0	0	0	0	0	0	0	1
sp|Q9R0Q3|TMED2_MOUSE	Tmed2	Transmembrane emp24 domain-containing protein 2 OS=Mus musculus GN=Tmed2 PE=1 SV=1	0	0	0	0	0	0	0	1	0	0	0	0	0	0	0	0
sp|Q8BK08|TMM11_MOUSE	Tmem11	Transmembrane protein 11, mitochondrial OS=Mus musculus GN=Tmem11 PE=1 SV=1	0	0	0	0	0	0	0	0	1	0	0	0	0	0	0	0
sp|Q9D1R1|T126B_MOUSE	Tmem126b	Complex I assembly factor TMEM126B, mitochondrial OS=Mus musculus GN=Tmem126b PE=1 SV=1	0	0	1	0	0	0	0	0	0	0	0	0	0	0	0	0
sp|Q9CQN6|TM14C_MOUSE	Tmem14c	Transmembrane protein 14C OS=Mus musculus GN=Tmem14c PE=1 SV=1	0	0	0	1	0	0	0	1	0	0	0	0	0	0	1	1
sp|Q8C996|TM163_MOUSE	Tmem163	Transmembrane protein 163 OS=Mus musculus GN=Tmem163 PE=1 SV=1	0	0	1	2	0	2	0	2	2	1	4	0	0	0	2	5
sp|Q8BVA2|TM222_MOUSE	Tmem222	Transmembrane protein 222 OS=Mus musculus GN=Tmem222 PE=1 SV=1	0	0	0	0	0	0	0	0	0	0	0	0	0	0	1	0
sp|Q5F285|TM256_MOUSE	Tmem256	Transmembrane protein 256 OS=Mus musculus GN=Tmem256 PE=1 SV=1	0	0	0	0	0	0	0	2	0	0	0	0	0	0	0	0
sp|Q9DAM7|TM263_MOUSE	Tmem263	Transmembrane protein 263 OS=Mus musculus GN=Tmem263 PE=1 SV=1	10	1	0	0	3	7	0	0	1	2	0	0	8	3	0	0
sp|Q8VEK0|CC50A_MOUSE	Tmem30a	Cell cycle control protein 50A OS=Mus musculus GN=Tmem30a PE=1 SV=1	0	0	0	0	0	3	0	0	0	0	0	0	0	0	0	0
sp|Q9CR67|TMM33_MOUSE	Tmem33	Transmembrane protein 33 OS=Mus musculus GN=Tmem33 PE=1 SV=1	0	0	1	0	0	0	0	1	1	0	2	1	0	0	0	1
sp|Q9D328|TM35A_MOUSE	Tmem35a	Transmembrane protein 35A OS=Mus musculus GN=Tmem35a PE=1 SV=1	1	5	1	2	0	0	1	4	1	0	2	2	0	0	1	3
sp|Q4VAE3|TMM65_MOUSE	Tmem65	Transmembrane protein 65 OS=Mus musculus GN=Tmem65 PE=1 SV=1	0	0	4	4	0	5	1	1	2	2	3	2	1	4	6	3
sp|Q9JKK7|TMOD2_MOUSE	Tmod2	Tropomodulin-2 OS=Mus musculus GN=Tmod2 PE=1 SV=2	0	0	0	0	0	8	0	0	0	0	0	0	0	0	0	0
tr|Q9CX93|Q9CX93_MOUSE	Tmtc2	Putative uncharacterized protein OS=Mus musculus GN=Tmtc2 PE=2 SV=1	0	0	0	0	0	0	2	0	0	0	0	0	0	0	0	0
sp|Q9D710|TMX2_MOUSE	Tmx2	Thioredoxin-related transmembrane protein 2 OS=Mus musculus GN=Tmx2 PE=1 SV=1	0	0	0	2	0	0	0	4	2	0	0	0	0	0	2	0
sp|Q8C0L0|TMX4_MOUSE	Tmx4	Thioredoxin-related transmembrane protein 4 OS=Mus musculus GN=Tmx4 PE=1 SV=2	0	0	0	0	1	2	0	0	0	0	0	0	0	0	0	0
sp|P83510|TNIK_MOUSE	Tnik	Traf2 and NCK-interacting protein kinase OS=Mus musculus GN=Tnik PE=1 SV=2	0	0	0	0	0	1	0	1	0	0	0	0	0	0	0	0
sp|Q8BYI9|TENR_MOUSE	Tnr	Tenascin-R OS=Mus musculus GN=Tnr PE=1 SV=2	5	18	25	20	2	19	23	20	11	4	17	21	4	3	23	15
sp|Q3UHK8|TNR6A_MOUSE	Tnrc6a	Trinucleotide repeat-containing gene 6A protein OS=Mus musculus GN=Tnrc6a PE=2 SV=1	0	1	0	0	0	0	0	0	0	0	0	0	0	0	0	0
sp|Q9QZ06|TOLIP_MOUSE	Tollip	Toll-interacting protein OS=Mus musculus GN=Tollip PE=1 SV=1	0	0	3	2	0	3	0	0	0	0	0	0	0	0	1	2
sp|O88746|TOM1_MOUSE	Tom1	Target of Myb protein 1 OS=Mus musculus GN=Tom1 PE=1 SV=1	0	0	0	0	0	1	0	0	0	0	0	0	0	0	0	0
sp|Q9DCC8|TOM20_MOUSE	Tomm20	Mitochondrial import receptor subunit TOM20 homolog OS=Mus musculus GN=Tomm20 PE=1 SV=1	0	0	0	0	0	1	0	0	0	0	0	0	0	0	0	0
sp|Q9CPQ3|TOM22_MOUSE	Tomm22	Mitochondrial import receptor subunit TOM22 homolog OS=Mus musculus GN=Tomm22 PE=1 SV=3	0	1	2	4	0	4	1	4	0	0	1	2	0	0	6	4
sp|Q9QYA2|TOM40_MOUSE	Tomm40	Mitochondrial import receptor subunit TOM40 homolog OS=Mus musculus GN=Tomm40 PE=1 SV=3	0	0	0	0	0	0	0	0	0	0	0	0	0	0	1	0
sp|Q9CZW5|TOM70_MOUSE	Tomm70	Mitochondrial import receptor subunit TOM70 OS=Mus musculus GN=Tomm70 PE=1 SV=2	0	6	4	5	1	2	0	0	0	0	0	0	0	0	2	4
sp|Q62393|TPD52_MOUSE	Tpd52	Tumor protein D52 OS=Mus musculus GN=Tpd52 PE=1 SV=2	0	0	0	0	0	2	0	0	0	0	0	0	0	0	0	0
sp|Q9CYZ2|TPD54_MOUSE	Tpd52l2	Tumor protein D54 OS=Mus musculus GN=Tpd52l2 PE=1 SV=1	0	0	0	0	0	3	0	0	0	0	0	0	0	0	0	0
sp|P17751|TPIS_MOUSE	Tpi1	Triosephosphate isomerase OS=Mus musculus GN=Tpi1 PE=1 SV=4	7	18	9	9	7	15	7	5	8	4	6	7	10	5	10	9
sp|P58771|TPM1_MOUSE	Tpm1	Tropomyosin alpha-1 chain OS=Mus musculus GN=Tpm1 PE=1 SV=1	0	0	0	0	0	5	0	0	0	0	0	0	0	0	0	0
sp|P58774|TPM2_MOUSE	Tpm2	Tropomyosin beta chain OS=Mus musculus GN=Tpm2 PE=1 SV=1	1	2	0	0	0	4	0	0	0	0	0	0	0	1	0	0
tr|Q58E70|Q58E70_MOUSE	Tpm3	Putative uncharacterized protein OS=Mus musculus GN=Tpm3 PE=2 SV=1	0	0	0	0	0	7	2	0	0	0	0	0	0	0	0	0
sp|Q6IRU2|TPM4_MOUSE	Tpm4	Tropomyosin alpha-4 chain OS=Mus musculus GN=Tpm4 PE=1 SV=3	0	2	0	0	0	0	0	0	0	0	0	0	0	0	0	0
sp|Q64514|TPP2_MOUSE	Tpp2	Tripeptidyl-peptidase 2 OS=Mus musculus GN=Tpp2 PE=1 SV=3	0	3	7	5	0	2	1	4	0	0	2	3	1	0	2	3
sp|Q7TQD2|TPPP_MOUSE	Tppp	Tubulin polymerization-promoting protein OS=Mus musculus GN=Tppp PE=1 SV=1	3	10	2	6	2	13	2	2	4	2	3	3	4	7	4	3
sp|Q9CRB6|TPPP3_MOUSE	Tppp3	Tubulin polymerization-promoting protein family member 3 OS=Mus musculus GN=Tppp3 PE=1 SV=1	0	0	0	0	0	1	0	0	0	0	1	0	0	0	0	0
sp|F6ZDS4|TPR_MOUSE	Tpr	Nucleoprotein TPR OS=Mus musculus GN=Tpr PE=1 SV=1	0	1	0	0	0	0	0	3	0	0	0	0	0	0	0	0
sp|Q9DBS2|TPRGL_MOUSE	Tprg1l	Tumor protein p63-regulated gene 1-like protein OS=Mus musculus GN=Tprg1l PE=1 SV=1	0	0	0	3	0	4	0	0	0	1	0	0	0	0	1	3
sp|P63028|TCTP_MOUSE	Tpt1	Translationally-controlled tumor protein OS=Mus musculus GN=Tpt1 PE=1 SV=1	0	5	0	0	0	0	0	0	0	0	0	0	0	0	0	1
sp|P62996|TRA2B_MOUSE	Tra2b	Transformer-2 protein homolog beta OS=Mus musculus GN=Tra2b PE=1 SV=1	0	0	0	0	0	1	0	0	0	0	0	0	0	0	0	0
sp|Q5NCF2|TPPC1_MOUSE	Trappc1	Trafficking protein particle complex subunit 1 OS=Mus musculus GN=Trappc1 PE=1 SV=1	0	0	0	0	0	1	0	0	0	0	0	0	0	0	0	0
sp|Q9ES56|TPPC4_MOUSE	Trappc4	Trafficking protein particle complex subunit 4 OS=Mus musculus GN=Trappc4 PE=1 SV=1	7	0	0	0	0	0	2	0	0	0	0	0	0	0	1	0
sp|Q9ESN6|TRIM2_MOUSE	Trim2	Tripartite motif-containing protein 2 OS=Mus musculus GN=Trim2 PE=1 SV=1	0	0	0	0	0	0	0	1	0	0	2	0	0	0	0	0
sp|Q62318|TIF1B_MOUSE	Trim28	Transcription intermediary factor 1-beta OS=Mus musculus GN=Trim28 PE=1 SV=3	0	2	0	0	0	2	0	0	0	0	0	0	0	0	0	1
sp|Q7TNM2|TRI46_MOUSE	Trim46	Tripartite motif-containing protein 46 OS=Mus musculus GN=Trim46 PE=1 SV=1	0	0	0	0	0	1	0	0	0	0	0	0	0	0	0	0
tr|Q8JZK6|Q8JZK6_MOUSE	Trim61	MCG22896, isoform CRA_b OS=Mus musculus GN=Trim61 PE=2 SV=1	0	0	0	0	0	0	0	3	0	0	0	0	0	0	0	0
sp|O08848|RO60_MOUSE	Trove2	60 kDa SS-A/Ro ribonucleoprotein OS=Mus musculus GN=Trove2 PE=1 SV=1	0	0	1	0	0	0	0	0	0	0	0	0	0	0	0	0
sp|Q4QQM4|P5I11_MOUSE	Trp53i11	Tumor protein p53-inducible protein 11 OS=Mus musculus GN=Trp53i11 PE=1 SV=1	0	0	1	1	0	0	1	1	0	0	1	1	0	0	1	1
tr|Q792Z1|Q792Z1_MOUSE	Try10	MCG140784 OS=Mus musculus GN=Try10 PE=1 SV=1	8	6	0	0	2	1	2	0	0	2	0	0	0	4	1	0
sp|Q61037|TSC2_MOUSE	Tsc2	Tuberin OS=Mus musculus GN=Tsc2 PE=1 SV=1	0	0	0	0	0	0	0	0	0	0	0	0	0	0	0	1
sp|Q6P7W5|SEN2_MOUSE	Tsen2	tRNA-splicing endonuclease subunit Sen2 OS=Mus musculus GN=Tsen2 PE=1 SV=1	0	0	0	0	0	0	0	0	0	0	0	0	0	1	0	0
sp|Q922J6|TSN2_MOUSE	Tspan2	Tetraspanin-2 OS=Mus musculus GN=Tspan2 PE=1 SV=1	0	0	2	4	0	0	0	5	0	0	3	3	0	0	5	5
sp|Q62283|TSN7_MOUSE	Tspan7	Tetraspanin-7 OS=Mus musculus GN=Tspan7 PE=1 SV=2	2	1	3	3	0	3	1	2	1	3	1	3	1	3	1	2
sp|Q8C8T8|TSR2_MOUSE	Tsr2	Pre-rRNA-processing protein TSR2 homolog OS=Mus musculus GN=Tsr2 PE=1 SV=1	0	0	0	0	0	2	0	0	0	0	0	0	0	0	0	0
sp|P52196|THTR_MOUSE	Tst	Thiosulfate sulfurtransferase OS=Mus musculus GN=Tst PE=1 SV=3	0	1	1	0	0	2	0	0	0	0	0	0	0	0	0	0
sp|Q91Z38|TTC1_MOUSE	Ttc1	Tetratricopeptide repeat protein 1 OS=Mus musculus GN=Ttc1 PE=1 SV=1	0	0	0	0	0	1	0	0	0	0	0	0	0	0	0	0
sp|A2ASS6|TITIN_MOUSE	Ttn	Titin OS=Mus musculus GN=Ttn PE=1 SV=1	0	0	0	0	1	0	0	0	0	0	0	0	1	0	0	0
sp|P07309|TTHY_MOUSE	Ttr	Transthyretin OS=Mus musculus GN=Ttr PE=1 SV=1	0	1	0	0	0	0	0	0	0	0	0	0	0	0	0	0
sp|Q9D3A9|TTYH1_MOUSE	Ttyh1	Protein tweety homolog 1 OS=Mus musculus GN=Ttyh1 PE=1 SV=1	0	0	0	0	0	1	0	0	0	0	0	0	0	0	0	0
sp|P68369|TBA1A_MOUSE	Tuba1a	Tubulin alpha-1A chain OS=Mus musculus GN=Tuba1a PE=1 SV=1	46	79	45	48	43	74	34	44	35	42	42	34	58	61	35	53
sp|P68373|TBA1C_MOUSE	Tuba1c	Tubulin alpha-1C chain OS=Mus musculus GN=Tuba1c PE=1 SV=1	1	0	0	1	1	0	1	1	3	4	1	0	1	2	1	2
sp|P05214|TBA3_MOUSE	Tuba3a	Tubulin alpha-3 chain OS=Mus musculus GN=Tuba3a PE=1 SV=1	0	5	0	0	0	0	0	0	0	0	0	0	0	0	0	0
sp|P68368|TBA4A_MOUSE	Tuba4a	Tubulin alpha-4A chain OS=Mus musculus GN=Tuba4a PE=1 SV=1	7	11	5	4	9	14	4	4	5	3	5	4	11	6	4	4
sp|Q3UX10|TBAL3_MOUSE	Tubal3	Tubulin alpha chain-like 3 OS=Mus musculus GN=Tubal3 PE=2 SV=2	0	5	1	2	0	1	0	1	1	0	0	0	1	2	2	1
sp|Q7TMM9|TBB2A_MOUSE	Tubb2a	Tubulin beta-2A chain OS=Mus musculus GN=Tubb2a PE=1 SV=1	1	0	3	2	0	7	2	3	3	0	2	2	0	0	3	2
sp|Q9CWF2|TBB2B_MOUSE	Tubb2b	Tubulin beta-2B chain OS=Mus musculus GN=Tubb2b PE=1 SV=1	20	36	32	31	25	43	21	32	35	14	22	21	32	25	28	26
sp|Q9ERD7|TBB3_MOUSE	Tubb3	Tubulin beta-3 chain OS=Mus musculus GN=Tubb3 PE=1 SV=1	49	107	62	66	45	103	62	65	37	35	61	59	45	67	53	62
sp|Q9D6F9|TBB4A_MOUSE	Tubb4a	Tubulin beta-4A chain OS=Mus musculus GN=Tubb4a PE=1 SV=3	11	33	18	13	15	17	11	15	22	7	16	20	15	10	14	17
sp|P68372|TBB4B_MOUSE	Tubb4b	Tubulin beta-4B chain OS=Mus musculus GN=Tubb4b PE=1 SV=1	0	1	2	2	1	2	1	2	1	1	1	1	0	0	1	1
sp|P99024|TBB5_MOUSE	Tubb5	Tubulin beta-5 chain OS=Mus musculus GN=Tubb5 PE=1 SV=1	7	8	7	5	6	4	3	7	3	2	3	6	6	6	8	6
sp|Q8BFR5|EFTU_MOUSE	Tufm	Elongation factor Tu, mitochondrial OS=Mus musculus GN=Tufm PE=1 SV=1	6	13	6	6	5	9	5	9	7	2	5	6	2	2	5	13
sp|Q91YR1|TWF1_MOUSE	Twf1	Twinfilin-1 OS=Mus musculus GN=Twf1 PE=1 SV=2	0	1	4	4	0	7	1	4	1	0	2	1	0	0	2	2
sp|Q9Z0P5|TWF2_MOUSE	Twf2	Twinfilin-2 OS=Mus musculus GN=Twf2 PE=1 SV=1	0	0	4	3	0	4	1	3	0	0	0	0	0	0	2	3
sp|P10639|THIO_MOUSE	Txn	Thioredoxin OS=Mus musculus GN=Txn PE=1 SV=3	2	0	0	0	0	21	1	0	0	0	0	0	0	0	0	0
sp|P97493|THIOM_MOUSE	Txn2	Thioredoxin, mitochondrial OS=Mus musculus GN=Txn2 PE=1 SV=1	0	1	0	0	0	0	0	0	0	0	0	0	0	0	0	0
sp|Q9CQU0|TXD12_MOUSE	Txndc12	Thioredoxin domain-containing protein 12 OS=Mus musculus GN=Txndc12 PE=1 SV=1	0	0	0	0	0	1	0	0	0	0	0	0	0	0	0	0
sp|Q9CQM5|TXD17_MOUSE	Txndc17	Thioredoxin domain-containing protein 17 OS=Mus musculus GN=Txndc17 PE=1 SV=1	0	0	0	0	0	1	0	0	0	0	0	0	0	0	0	0
sp|Q8CDN6|TXNL1_MOUSE	Txnl1	Thioredoxin-like protein 1 OS=Mus musculus GN=Txnl1 PE=1 SV=3	0	5	2	3	0	0	2	2	1	0	1	4	0	0	2	4
sp|Q9JMH6|TRXR1_MOUSE	Txnrd1	Thioredoxin reductase 1, cytoplasmic OS=Mus musculus GN=Txnrd1 PE=1 SV=3	0	0	1	1	0	0	0	2	0	0	0	1	0	0	1	0
sp|Q9JLT4|TRXR2_MOUSE	Txnrd2	Thioredoxin reductase 2, mitochondrial OS=Mus musculus GN=Txnrd2 PE=1 SV=4	0	0	2	2	0	0	0	0	0	0	0	0	0	0	0	0
sp|Q02053|UBA1_MOUSE	Uba1	Ubiquitin-like modifier-activating enzyme 1 OS=Mus musculus GN=Uba1 PE=1 SV=1	0	6	6	11	0	7	4	4	4	0	2	6	6	0	6	7
sp|Q9Z1F9|SAE2_MOUSE	Uba2	SUMO-activating enzyme subunit 2 OS=Mus musculus GN=Uba2 PE=1 SV=1	1	6	1	0	0	0	1	0	0	0	0	0	3	0	0	0
sp|Q8VE47|UBA5_MOUSE	Uba5	Ubiquitin-like modifier-activating enzyme 5 OS=Mus musculus GN=Uba5 PE=1 SV=2	0	1	1	2	0	3	0	2	0	0	1	0	0	0	0	0
sp|P61080|UB2D1_MOUSE	Ube2d1	Ubiquitin-conjugating enzyme E2 D1 OS=Mus musculus GN=Ube2d1 PE=2 SV=1	0	0	0	0	0	1	0	0	0	0	0	0	0	0	0	0
sp|P62838|UB2D2_MOUSE	Ube2d2	Ubiquitin-conjugating enzyme E2 D2 OS=Mus musculus GN=Ube2d2 PE=1 SV=1	0	1	0	0	0	3	0	0	0	0	0	0	2	0	0	0
sp|P61087|UBE2K_MOUSE	Ube2k	Ubiquitin-conjugating enzyme E2 K OS=Mus musculus GN=Ube2k PE=1 SV=3	0	0	0	0	0	2	0	0	0	0	0	0	0	0	0	0
sp|P68037|UB2L3_MOUSE	Ube2l3	Ubiquitin-conjugating enzyme E2 L3 OS=Mus musculus GN=Ube2l3 PE=1 SV=1	0	0	0	0	0	0	0	0	0	0	0	0	0	0	1	2
sp|P61082|UBC12_MOUSE	Ube2m	NEDD8-conjugating enzyme Ubc12 OS=Mus musculus GN=Ube2m PE=1 SV=1	0	0	1	1	0	0	1	2	0	1	0	0	0	0	0	0
sp|P61089|UBE2N_MOUSE	Ube2n	Ubiquitin-conjugating enzyme E2 N OS=Mus musculus GN=Ube2n PE=1 SV=1	0	8	2	0	0	7	1	1	0	0	0	0	0	0	0	0
sp|Q6ZPJ3|UBE2O_MOUSE	Ube2o	(E3-independent) E2 ubiquitin-conjugating enzyme UBE2O OS=Mus musculus GN=Ube2o PE=1 SV=3	0	0	3	2	0	0	1	5	1	0	1	2	0	0	2	1
sp|Q9CZY3|UB2V1_MOUSE	Ube2v1	Ubiquitin-conjugating enzyme E2 variant 1 OS=Mus musculus GN=Ube2v1 PE=1 SV=1	2	11	4	5	0	10	2	2	5	1	0	4	3	3	3	3
sp|Q9D2M8|UB2V2_MOUSE	Ube2v2	Ubiquitin-conjugating enzyme E2 variant 2 OS=Mus musculus GN=Ube2v2 PE=1 SV=4	0	0	0	0	0	7	0	0	0	0	0	0	0	0	0	1
sp|O08759|UBE3A_MOUSE	Ube3a	Ubiquitin-protein ligase E3A OS=Mus musculus GN=Ube3a PE=1 SV=2	0	0	1	0	0	0	1	1	0	0	1	1	0	0	1	1
sp|Q8R317|UBQL1_MOUSE	Ubqln1	Ubiquilin-1 OS=Mus musculus GN=Ubqln1 PE=1 SV=1	0	0	0	0	0	1	0	0	0	0	0	0	0	0	0	0
sp|Q9QZM0|UBQL2_MOUSE	Ubqln2	Ubiquilin-2 OS=Mus musculus GN=Ubqln2 PE=1 SV=2	0	0	0	0	0	2	0	0	0	0	0	0	0	0	0	0
sp|Q99NB8|UBQL4_MOUSE	Ubqln4	Ubiquilin-4 OS=Mus musculus GN=Ubqln4 PE=1 SV=1	0	0	0	0	0	4	0	0	0	0	0	0	0	0	0	0
sp|A2AN08|UBR4_MOUSE	Ubr4	E3 ubiquitin-protein ligase UBR4 OS=Mus musculus GN=Ubr4 PE=1 SV=1	0	2	0	0	0	0	0	0	1	0	0	0	0	0	1	0
sp|Q99PL6|UBXN6_MOUSE	Ubxn6	UBX domain-containing protein 6 OS=Mus musculus GN=Ubxn6 PE=1 SV=1	0	0	0	0	0	1	0	0	0	0	0	0	0	0	0	0
sp|Q9R0P9|UCHL1_MOUSE	Uchl1	Ubiquitin carboxyl-terminal hydrolase isozyme L1 OS=Mus musculus GN=Uchl1 PE=1 SV=1	0	7	8	8	0	27	9	7	3	3	4	8	3	4	8	5
sp|Q9JKB1|UCHL3_MOUSE	Uchl3	Ubiquitin carboxyl-terminal hydrolase isozyme L3 OS=Mus musculus GN=Uchl3 PE=1 SV=2	0	0	0	0	0	5	0	0	0	0	0	0	0	0	0	0
sp|P61961|UFM1_MOUSE	Ufm1	Ubiquitin-fold modifier 1 OS=Mus musculus GN=Ufm1 PE=1 SV=1	0	1	1	1	0	2	0	0	0	0	0	1	0	0	1	3
sp|Q91ZJ5|UGPA_MOUSE	Ugp2	UTP--glucose-1-phosphate uridylyltransferase OS=Mus musculus GN=Ugp2 PE=1 SV=3	0	0	0	0	0	3	0	0	0	0	0	0	0	0	1	1
sp|Q4KUS2|UN13A_MOUSE	Unc13a	Protein unc-13 homolog A OS=Mus musculus GN=Unc13a PE=1 SV=3	0	0	0	0	0	0	0	0	0	2	0	1	0	0	0	1
sp|Q8K0T7|UN13C_MOUSE	Unc13c	Protein unc-13 homolog C OS=Mus musculus GN=Unc13c PE=1 SV=3	0	0	0	1	0	0	0	0	2	0	1	1	0	0	0	1
sp|Q8R1I1|QCR9_MOUSE	Uqcr10	Cytochrome b-c1 complex subunit 9 OS=Mus musculus GN=Uqcr10 PE=1 SV=1	0	0	0	3	0	0	0	0	1	0	0	4	0	0	2	2
sp|Q9CZ13|QCR1_MOUSE	Uqcrc1	Cytochrome b-c1 complex subunit 1, mitochondrial OS=Mus musculus GN=Uqcrc1 PE=1 SV=2	0	9	4	1	0	8	4	9	1	1	2	4	3	2	3	3
sp|Q9DB77|QCR2_MOUSE	Uqcrc2	Cytochrome b-c1 complex subunit 2, mitochondrial OS=Mus musculus GN=Uqcrc2 PE=1 SV=1	0	8	7	6	1	11	12	10	4	6	7	6	4	0	4	10
sp|Q9CR68|UCRI_MOUSE	Uqcrfs1	Cytochrome b-c1 complex subunit Rieske, mitochondrial OS=Mus musculus GN=Uqcrfs1 PE=1 SV=1	4	7	5	6	6	5	6	8	2	3	5	5	1	2	7	6
sp|Q9CQ69|QCR8_MOUSE	Uqcrq	Cytochrome b-c1 complex subunit 8 OS=Mus musculus GN=Uqcrq PE=1 SV=3	1	0	0	0	0	3	0	0	0	0	0	0	1	0	0	0
sp|Q78IK2|USMG5_MOUSE	Usmg5	Up-regulated during skeletal muscle growth protein 5 OS=Mus musculus GN=Usmg5 PE=1 SV=1	0	0	0	0	0	2	0	0	0	0	1	0	1	1	0	0
sp|Q9JMA1|UBP14_MOUSE	Usp14	Ubiquitin carboxyl-terminal hydrolase 14 OS=Mus musculus GN=Usp14 PE=1 SV=3	0	1	1	3	0	11	2	1	0	0	2	1	0	0	1	2
sp|B1AQJ2|UBP36_MOUSE	Usp36	Ubiquitin carboxyl-terminal hydrolase 36 OS=Mus musculus GN=Usp36 PE=1 SV=1	0	0	0	0	0	0	0	0	0	0	1	0	0	0	0	0
sp|P56399|UBP5_MOUSE	Usp5	Ubiquitin carboxyl-terminal hydrolase 5 OS=Mus musculus GN=Usp5 PE=1 SV=1	1	4	14	10	3	8	6	11	8	4	3	7	0	2	8	12
sp|P70398|USP9X_MOUSE	Usp9x	Probable ubiquitin carboxyl-terminal hydrolase FAF-X OS=Mus musculus GN=Usp9x PE=1 SV=2	1	0	2	2	0	0	2	4	0	0	2	3	0	0	2	1
sp|Q62442|VAMP1_MOUSE	Vamp1	Vesicle-associated membrane protein 1 OS=Mus musculus GN=Vamp1 PE=1 SV=1	1	0	0	3	0	3	1	0	0	0	0	1	0	0	0	0
sp|P63044|VAMP2_MOUSE	Vamp2	Vesicle-associated membrane protein 2 OS=Mus musculus GN=Vamp2 PE=1 SV=2	0	12	2	3	2	5	7	3	4	0	2	1	5	1	1	2
sp|P63024|VAMP3_MOUSE	Vamp3	Vesicle-associated membrane protein 3 OS=Mus musculus GN=Vamp3 PE=1 SV=1	1	1	1	3	0	9	2	3	1	0	1	2	31	1	1	1
sp|O70404|VAMP8_MOUSE	Vamp8	Vesicle-associated membrane protein 8 OS=Mus musculus GN=Vamp8 PE=1 SV=1	0	0	0	0	0	0	0	0	0	0	0	0	0	0	0	1
sp|Q9WV55|VAPA_MOUSE	Vapa	Vesicle-associated membrane protein-associated protein A OS=Mus musculus GN=Vapa PE=1 SV=2	0	2	1	4	0	2	2	3	0	1	2	2	0	1	2	3
sp|Q9QY76|VAPB_MOUSE	Vapb	Vesicle-associated membrane protein-associated protein B OS=Mus musculus GN=Vapb PE=1 SV=3	0	0	0	0	0	8	0	0	0	0	0	0	0	0	0	0
sp|Q62465|VAT1_MOUSE	Vat1	Synaptic vesicle membrane protein VAT-1 homolog OS=Mus musculus GN=Vat1 PE=1 SV=3	3	3	10	8	3	8	5	10	8	5	7	5	4	7	8	6
sp|Q80TB8|VAT1L_MOUSE	Vat1l	Synaptic vesicle membrane protein VAT-1 homolog-like OS=Mus musculus GN=Vat1l PE=1 SV=2	0	5	1	1	0	6	0	3	0	0	0	0	0	0	0	2
sp|P61759|PFD3_MOUSE	Vbp1	Prefoldin subunit 3 OS=Mus musculus GN=Vbp1 PE=1 SV=2	0	1	0	0	0	0	0	0	0	0	0	0	0	0	0	0
tr|Q8BS97|Q8BS97_MOUSE	Vcan	Putative uncharacterized protein OS=Mus musculus GN=Vcan PE=1 SV=1	0	0	0	0	0	1	0	0	0	0	0	0	0	0	0	0
sp|Q01853|TERA_MOUSE	Vcp	Transitional endoplasmic reticulum ATPase OS=Mus musculus GN=Vcp PE=1 SV=4	0	8	4	7	1	9	5	6	2	0	2	5	1	2	3	8
sp|Q60932|VDAC1_MOUSE	Vdac1	Voltage-dependent anion-selective channel protein 1 OS=Mus musculus GN=Vdac1 PE=1 SV=3	1	6	10	8	0	10	7	11	2	2	2	13	0	1	3	4
sp|Q60930|VDAC2_MOUSE	Vdac2	Voltage-dependent anion-selective channel protein 2 OS=Mus musculus GN=Vdac2 PE=1 SV=2	0	1	3	6	2	4	1	4	1	1	1	5	1	0	4	2
sp|Q60931|VDAC3_MOUSE	Vdac3	Voltage-dependent anion-selective channel protein 3 OS=Mus musculus GN=Vdac3 PE=1 SV=1	0	0	1	2	0	0	0	2	1	1	0	1	0	0	1	1
tr|Q0VGU4|Q0VGU4_MOUSE	Vgf	MCG18019 OS=Mus musculus GN=Vgf PE=1 SV=1	0	0	0	0	0	1	0	0	0	0	0	0	0	0	0	0
sp|P20152|VIME_MOUSE	Vim	Vimentin OS=Mus musculus GN=Vim PE=1 SV=3	0	4	0	0	0	3	0	0	0	0	0	0	0	0	0	0
sp|Q99KU0|VMP1_MOUSE	Vmp1	Vacuole membrane protein 1 OS=Mus musculus GN=Vmp1 PE=1 SV=2	0	0	0	1	0	0	0	0	0	0	0	0	0	0	0	0
sp|Q920Q4|VPS16_MOUSE	Vps16	Vacuolar protein sorting-associated protein 16 homolog OS=Mus musculus GN=Vps16 PE=1 SV=3	0	0	0	0	0	0	0	0	0	0	0	2	0	0	0	0
sp|Q8R307|VPS18_MOUSE	Vps18	Vacuolar protein sorting-associated protein 18 homolog OS=Mus musculus GN=Vps18 PE=1 SV=2	0	0	0	0	0	1	0	0	0	0	0	0	0	0	0	0
sp|P40336|VP26A_MOUSE	Vps26a	Vacuolar protein sorting-associated protein 26A OS=Mus musculus GN=Vps26a PE=1 SV=1	0	0	1	3	0	4	1	2	3	2	1	1	0	0	1	4
sp|Q8C0E2|VP26B_MOUSE	Vps26b	Vacuolar protein sorting-associated protein 26B OS=Mus musculus GN=Vps26b PE=1 SV=1	2	0	0	0	5	4	1	0	2	0	1	0	2	5	1	0
sp|Q9QZ88|VPS29_MOUSE	Vps29	Vacuolar protein sorting-associated protein 29 OS=Mus musculus GN=Vps29 PE=1 SV=1	0	1	2	1	0	0	2	2	8	0	3	2	0	0	2	2
sp|Q9EQH3|VPS35_MOUSE	Vps35	Vacuolar protein sorting-associated protein 35 OS=Mus musculus GN=Vps35 PE=1 SV=1	0	0	1	1	0	3	2	1	0	0	1	1	0	0	1	2
sp|Q3UVL4|VPS51_MOUSE	Vps51	Vacuolar protein sorting-associated protein 51 homolog OS=Mus musculus GN=Vps51 PE=1 SV=2	0	2	0	0	0	0	0	0	0	0	1	0	1	0	0	0
sp|Q8C754|VPS52_MOUSE	Vps52	Vacuolar protein sorting-associated protein 52 homolog OS=Mus musculus GN=Vps52 PE=1 SV=1	0	0	1	1	0	0	0	1	0	0	0	1	0	0	0	2
sp|Q8CCB4|VPS53_MOUSE	Vps53	Vacuolar protein sorting-associated protein 53 homolog OS=Mus musculus GN=Vps53 PE=1 SV=1	0	0	1	0	0	0	0	0	0	0	0	0	0	0	0	0
sp|P62761|VISL1_MOUSE	Vsnl1	Visinin-like protein 1 OS=Mus musculus GN=Vsnl1 PE=1 SV=2	0	13	4	7	0	17	4	2	5	5	4	4	1	1	3	5
sp|Q9CR26|VTA1_MOUSE	Vta1	Vacuolar protein sorting-associated protein VTA1 homolog OS=Mus musculus GN=Vta1 PE=1 SV=1	0	0	0	1	0	1	0	0	0	0	0	0	0	0	0	0
sp|P29788|VTNC_MOUSE	Vtn	Vitronectin OS=Mus musculus GN=Vtn PE=1 SV=2	4	8	1	2	4	0	3	2	5	3	0	3	3	4	1	4
sp|P32921|SYWC_MOUSE	Wars	Tryptophan--tRNA ligase, cytoplasmic OS=Mus musculus GN=Wars PE=1 SV=2	0	1	1	2	0	1	0	0	0	0	0	0	0	0	0	0
sp|Q8R5H6|WASF1_MOUSE	Wasf1	Wiskott-Aldrich syndrome protein family member 1 OS=Mus musculus GN=Wasf1 PE=1 SV=2	0	2	0	1	0	3	0	0	0	0	0	0	0	0	1	1
sp|O88342|WDR1_MOUSE	Wdr1	WD repeat-containing protein 1 OS=Mus musculus GN=Wdr1 PE=1 SV=3	4	11	10	9	0	5	5	11	2	4	6	5	3	6	7	8
sp|Q8CBE3|WDR37_MOUSE	Wdr37	WD repeat-containing protein 37 OS=Mus musculus GN=Wdr37 PE=1 SV=1	1	1	0	1	0	1	1	1	0	0	2	2	1	0	3	1
sp|Q6NVE8|WDR44_MOUSE	Wdr44	WD repeat-containing protein 44 OS=Mus musculus GN=Wdr44 PE=1 SV=1	0	3	2	1	0	1	2	3	0	0	1	1	0	0	0	3
sp|Q9Z0H1|WDR46_MOUSE	Wdr46	WD repeat-containing protein 46 OS=Mus musculus GN=Wdr46 PE=2 SV=1	0	0	1	1	0	0	0	0	0	0	1	0	0	0	0	0
sp|Q8CGF6|WDR47_MOUSE	Wdr47	WD repeat-containing protein 47 OS=Mus musculus GN=Wdr47 PE=1 SV=2	0	0	0	0	0	0	0	0	0	0	0	0	0	0	2	3
sp|Q9R0D8|WDR54_MOUSE	Wdr54	WD repeat-containing protein 54 OS=Mus musculus GN=Wdr54 PE=1 SV=1	0	0	0	0	0	0	0	0	0	0	0	0	1	0	0	0
sp|Q920I9|WDR7_MOUSE	Wdr7	WD repeat-containing protein 7 OS=Mus musculus GN=Wdr7 PE=1 SV=3	2	1	6	8	1	2	5	7	1	0	4	7	7	4	6	7
sp|Q8BFQ4|WDR82_MOUSE	Wdr82	WD repeat-containing protein 82 OS=Mus musculus GN=Wdr82 PE=1 SV=1	0	0	1	0	0	1	0	0	0	0	0	0	0	0	0	0
sp|Q66JT0|WEE2_MOUSE	Wee2	Wee1-like protein kinase 2 OS=Mus musculus GN=Wee2 PE=1 SV=2	0	0	0	0	3	0	0	0	0	0	0	0	0	0	0	0
sp|P56695|WFS1_MOUSE	Wfs1	Wolframin OS=Mus musculus GN=Wfs1 PE=1 SV=1	0	0	4	3	0	1	1	0	0	0	1	1	0	0	6	3
sp|P0C7L0|WIPF3_MOUSE	Wipf3	WAS/WASL-interacting protein family member 3 OS=Mus musculus GN=Wipf3 PE=1 SV=1	0	0	0	0	7	1	0	0	1	0	0	0	2	0	0	0
sp|Q80W47|WIPI2_MOUSE	Wipi2	WD repeat domain phosphoinositide-interacting protein 2 OS=Mus musculus GN=Wipi2 PE=1 SV=1	0	0	1	1	0	0	0	0	0	0	0	0	0	0	0	0
sp|Q3UH66|WNK2_MOUSE	Wnk2	Serine/threonine-protein kinase WNK2 OS=Mus musculus GN=Wnk2 PE=1 SV=2	0	0	0	0	0	2	0	0	0	0	0	0	0	0	0	0
sp|Q80XP9|WNK3_MOUSE	Wnk3	Serine/threonine-protein kinase WNK3 OS=Mus musculus GN=Wnk3 PE=1 SV=3	0	0	0	0	0	0	0	0	0	0	0	0	1	0	0	0
sp|Q6NXJ0|WWC2_MOUSE	Wwc2	Protein WWC2 OS=Mus musculus GN=Wwc2 PE=1 SV=1	0	0	0	0	0	0	0	0	5	0	0	0	0	0	0	0
sp|Q6P1B1|XPP1_MOUSE	Xpnpep1	Xaa-Pro aminopeptidase 1 OS=Mus musculus GN=Xpnpep1 PE=1 SV=1	0	0	0	1	0	2	0	2	0	0	0	0	0	0	2	0
sp|Q9EPK7|XPO7_MOUSE	Xpo7	Exportin-7 OS=Mus musculus GN=Xpo7 PE=1 SV=3	0	0	1	2	0	0	0	1	0	0	0	0	0	0	0	0
sp|Q91WQ3|SYYC_MOUSE	Yars	Tyrosine--tRNA ligase, cytoplasmic OS=Mus musculus GN=Yars PE=1 SV=3	0	0	0	0	0	2	0	0	0	0	0	0	0	0	0	0
sp|Q9CQW1|YKT6_MOUSE	Ykt6	Synaptobrevin homolog YKT6 OS=Mus musculus GN=Ykt6 PE=1 SV=1	0	0	0	0	0	2	0	0	0	0	0	0	0	0	0	2
sp|Q3U5F4|YRDC_MOUSE	Yrdc	YrdC domain-containing protein, mitochondrial OS=Mus musculus GN=Yrdc PE=1 SV=1	0	0	0	0	0	1	0	0	0	0	0	0	0	0	0	0
sp|Q9CQV8|1433B_MOUSE	Ywhab	14-3-3 protein beta/alpha OS=Mus musculus GN=Ywhab PE=1 SV=3	6	21	8	12	5	14	8	9	1	4	6	8	6	10	7	11
sp|P62259|1433E_MOUSE	Ywhae	14-3-3 protein epsilon OS=Mus musculus GN=Ywhae PE=1 SV=1	19	41	16	18	11	63	21	17	8	14	13	15	13	9	11	15
sp|P61982|1433G_MOUSE	Ywhag	14-3-3 protein gamma OS=Mus musculus GN=Ywhag PE=1 SV=2	8	24	10	8	5	24	7	8	9	8	8	9	7	8	7	9
sp|P68510|1433F_MOUSE	Ywhah	14-3-3 protein eta OS=Mus musculus GN=Ywhah PE=1 SV=2	6	27	5	8	1	5	4	6	2	4	4	6	4	4	3	7
sp|P68254|1433T_MOUSE	Ywhaq	14-3-3 protein theta OS=Mus musculus GN=Ywhaq PE=1 SV=1	3	7	6	7	2	9	6	4	6	2	4	5	4	4	4	6
sp|P63101|1433Z_MOUSE	Ywhaz	14-3-3 protein zeta/delta OS=Mus musculus GN=Ywhaz PE=1 SV=1	21	22	15	11	26	25	13	10	5	16	10	10	29	18	11	13
sp|Q80ZJ6|ZER1_MOUSE	Zer1	Protein zer-1 homolog OS=Mus musculus GN=Zer1 PE=1 SV=1	0	0	0	0	0	0	0	1	0	0	0	0	0	0	0	0
tr|Q8BSL0|Q8BSL0_MOUSE	Zkscan8	Putative uncharacterized protein OS=Mus musculus GN=Zkscan8 PE=2 SV=1	0	0	0	0	0	0	0	0	0	2	0	0	0	0	0	0
sp|Q80W54|FACE1_MOUSE	Zmpste24	CAAX prenyl protease 1 homolog OS=Mus musculus GN=Zmpste24 PE=1 SV=2	0	0	1	0	0	0	0	0	0	0	0	0	0	0	0	0
sp|Q61624|ZN148_MOUSE	Znf148	Zinc finger protein 148 OS=Mus musculus GN=Znf148 PE=1 SV=2	0	0	0	0	0	0	0	0	0	0	1	0	0	0	0	0
sp|Q3UFS0|ZY11B_MOUSE	Zyg11b	Protein zyg-11 homolog B OS=Mus musculus GN=Zyg11b PE=1 SV=2	0	0	0	0	0	1	0	0	0	0	0	0	0	0	0	0
sp|Q5SSH7|ZZEF1_MOUSE	Zzef1	Zinc finger ZZ-type and EF-hand domain-containing protein 1 OS=Mus musculus GN=Zzef1 PE=1 SV=2	0	0	0	0	0	0	0	0	0	0	0	0	0	0	0	1
sp|Q9D882|CJ035_MOUSE	uncharacterized protein or experimental contaminant	Uncharacterized protein C10orf35 homolog OS=Mus musculus PE=1 SV=1	0	0	0	0	0	2	0	0	0	0	0	0	0	0	0	0
IGHG_RABIT	uncharacterized protein or experimental contaminant		0	7	8	5	0	9	6	7	7	8	5	4	4	6	3	4
AVID_Chick	uncharacterized protein or experimental contaminant		169	122	35	24	92	139	59	28	56	54	43	39	223	170	19	26
IGJ_RABIT	uncharacterized protein or experimental contaminant		7	4	5	5	3	5	3	5	3	7	5	3	0	5	5	5
KAC4_RABIT	uncharacterized protein or experimental contaminant		47	12	4	2	14	13	4	4	12	29	4	3	22	28	3	2
Ig1_sheep	uncharacterized protein or experimental contaminant	immunoglobulin gamma-1 chain [Ovis aries]	0	0	3	0	0	0	0	0	0	0	0	0	0	0	0	0
sp|Q9D1K7|CT027_MOUSE	uncharacterized protein or experimental contaminant	UPF0687 protein C20orf27 homolog OS=Mus musculus PE=1 SV=3	0	0	1	3	0	0	1	2	0	0	1	2	0	0	2	1
IGKC_MOUSE	uncharacterized protein or experimental contaminant	Ig kappa chain C region OS=Mus musculus PE=1 SV=1	0	0	0	1	0	1	0	0	0	0	1	0	0	0	0	0
sp|Q9CQE8|CN166_MOUSE	uncharacterized protein or experimental contaminant	UPF0568 protein C14orf166 homolog OS=Mus musculus PE=1 SV=1	0	0	0	0	0	1	0	0	0	0	0	0	0	0	0	0
IgG1_bovine	uncharacterized protein or experimental contaminant	heavy chain constant region [Bos taurus]	0	0	1	0	0	0	0	0	0	0	0	0	0	0	0	0
KV2A7_MOUSE	uncharacterized protein or experimental contaminant	Ig kappa chain V-II region 26-10 OS=Mus musculus PE=1 SV=1	0	0	0	1	0	0	0	0	0	0	0	0	0	0	0	0
KACB_RABIT	uncharacterized protein or experimental contaminant		0	0	0	0	0	0	0	0	0	0	0	0	1	0	0	0
sp|P84750|KVM5_MOUSE	uncharacterized protein or experimental contaminant	Ig kappa chain V region Mem5 (Fragment) OS=Mus musculus PE=1 SV=1	0	0	0	0	0	0	0	0	0	0	0	0	0	1	0	0
tr|Q8R2W4|Q8R2W4_MOUSE	uncharacterized protein or experimental contaminant	Uncharacterized protein OS=Mus musculus PE=2 SV=1	0	0	0	0	0	0	0	0	0	0	0	0	0	0	1	0
tr|Q8CBI0|Q8CBI0_MOUSE	uncharacterized protein or experimental contaminant	Putative uncharacterized protein (Fragment) OS=Mus musculus PE=2 SV=1	0	1	0	0	0	0	0	0	0	0	0	0	0	0	0	0

## Sheet: Fig.1-SD2 DNA sequences
Figure 1 - Source Data 2
plasmid	sequence
LK18005-AAV2/5-syn-DIO-RIMPPCP-BirA	GTACCAGGCCTATCGATATAACTTCGTATAGGATACTTTATACGAAGTTATGCAGAATGGTAGCTGGATTGTAGCTATAACTTCGTATAGCATACATTATACGAAGTTATGGATCCACTAGTAACGGCCGCCAGTGTGCTGGAATTCGCGGCCGCGATGCCACCCGGGATCCCTATGCGTAATCCGGTACATCGTAAGGGTAAGCCTTCTCTGCGCTTCTCAGGGAGATTTCTCCGCCCATCCAGGGCTTGATGATTCCGTCCTGCTCCAGCAGCAGAGCTCCCTGCTTGTCGATTCCTCTGGAGATGCCGAAGATTTCCTTGTCGCCGATGATCAGCTTCACAGGTCTGTTGATGAAGTTGTCCAGCTTCTCCCATCTGCTCAGGTAAGGAGCCAGTC…
LK17008-AAV2/5-syn-DIO-ELKS2beta-BirA	GTACCAGGCCTATCGATATAACTTCGTATAGGATACTTTATACGAAGTTATGCAGAATGGTAGCTGGATTGTAGCTATAACTTCGTATAGCATACATTATACGAAGTTATGGATCCACTAGTAACGGCCGCCAGTGTGCTGGAATTCGCCCTTCCGGCTATGCCCATATGCCCTCCTCGTCATCCTGGTCCGGAGAGGGCCTGTGGTTGGAATGCTGTGACCTCCCAGGAGACCGGTGGTGGTGGTGATGGTGGTGGTGGTGGTAATGGTGGTGGTCGTCGTCATAGTTGTCTGCCATCAGCTTCATTCTATTCTGGGTCTGCTGCTTTAACTGATGCACCAGTCGGTCTTTCTCTCGCTTCAGTGCCATGACTTCCTCCTGCGTCTTTTTCTTCTTGG…
LK19004-AAV2/5-syn-DIO-CaVbeta4-BirA	GTACCAGGCCTATCGATATAACTTCGTATAGGATACTTTATACGAAGTTATGCAGAATGGTAGCTGGATTGTAGCTATAACTTCGTATAGCATACATTATACGAAGTTATGGATCCCTATGCGTAATCCGGTACATCGTAAGGGTAAGCCTTCTCTGCGCTTCTCAGGGAGATTTCTCCGCCCATCCAGGGCTTGATGATTCCGTCCTGCTCCAGCAGCAGAGCTCCCTGCTTGTCGATTCCTCTGGAGATGCCGAAGATTTCCTTGTCGCCGATGATCAGCTTCACAGGTCTGTTGATGAAGTTGTCCAGCTTCTCCCATCTGCTCAGGTAAGGAGCCAGTCCCTCCTGCTCGAACAGCTCCAGAGCGGCTCTCAGCTCTCTGATCAGCATGGCGGCC…
LK17011-AAV2/5-syn-DIO-BirA-tdTomato	GTACCAGGCCTATCGATATAACTTCGTATAGGATACTTTATACGAAGTTATGCAGAATGGTAGCTGGATTGTAGCTATAACTTCGTATAGCATACATTATACGAAGTTATGGATCCCTACTTGTACAGCTCGTCCATGCCGTACAGGAACAGGTGGTGGCGGCCCTCGGAGCGCTCGTACTGTTCCACGATGGTGTAGTCCTCGTTGTGGGAGGTGATGTCCAGCTTGGTGTCCACGTAGTAGTAGCCGGGCAGTTGCACGGGCTTCTTGGCCATGTAGATGGTCTTGAACTCCACCAGGTAGTGGCCGCCGTCCTTCAGCTTCAGGGCCTGGTGGATCTCGCCCTTCAGCACGCCGTCGCGGGGGTACAGGCGCTCGGTGGAGGCCTCCCAGCCCATG…

## Sheet: Fig.2-SD1 Venn 2-fold
Figure 2 - Source Data 1
control (threshold 2.0)
Gene	RIMPPCP (fold change)	ELKS2β (fold change)	CaVβ4 (fold change)	Enrichment Group
Rims1	4.5	3.33333	13.3333	ALL
Erc2	1	32	4	ELKS2β and CaVβ4
Cacnb4	1	1	37.5	CaVβ4 only
Acsbg1	4.375	4.1875	3.625	ALL
Akap5	5.5	13	4.13636	ALL
Ap1g1	3.5	2	2	ALL
Calm2	2.78571	6.85714	2.07143	ALL
Cend1	2.16667	3.58333	2.25	ALL
Crip2	4.5	3	2	ALL
Dnajc5	3	4.5	2	ALL
Gabbr2	3.75	2.25	4.75	ALL
Gng2	3	4	2.5	ALL
Hepacam	3.44444	2.5	3	ALL
Hist1h1d	2.5	5	2.5	ALL
Hist1h4a	4.38095	6.5	2.59524	ALL
Hpcal1	3.66667	6.66667	2.66667	ALL
Huwe1	2	2	2.5	ALL
Iqsec1	2	2.875	3.75	ALL
Itpa	2	3.5	2.5	ALL
Mpi	2	5	3.5	ALL
Naca	4.5	2.5	2	ALL
Napb	6.63636	9.31818	2.04545	ALL
Ncam2	2.19118	2.33824	4.32353	ALL
Nckap1	4	3.02381	6.30952	ALL
Nme1	4.83333	5.83333	3.16667	ALL
Nptn	13.9	8.7	2.1	ALL
Palm	2.78333	4.01667	2.41667	ALL
Prrt3	4.5	2	3.5	ALL
Psmd1	5	2.5	2.5	ALL
Psmd3	2.58333	2.75	6.875	ALL
Rab1b	4.1	3.7	4.7	ALL
Rab35	3.21429	3.78571	2.85714	ALL
Rab5a	5.375	5.5	2.8125	ALL
Rap1a	3	4.5	2.5	ALL
Rps2	2.5	2.5	2	ALL
Scamp3	2	2	2.5	ALL
Sh3gl1	2.5	2.5	2	ALL
Sh3gl2	2.25	4.25	2	ALL
Slc2a3	4.4	4	4.5	ALL
Slc3a2	6.46429	8.92857	3.53571	ALL
Snca	2.875	7.625	2	ALL
Sv2a	2.51515	2.15909	2.92424	ALL
Vsnl1	3.9375	4.625	3	ALL
Abi1	2	2	1	RIM and ELKS2β
Actr2	4.14286	6.28571	1.85714	RIM and ELKS2β
Add2	2	3.10294	0.764706	RIM and ELKS2β
Ak1	5	3.25	1.75	RIM and ELKS2β
Akr1b1	2.05	3.1	0.85	RIM and ELKS2β
Alcam	3.91667	2.25	1.91667	RIM and ELKS2β
Amph	2.5	9	1	RIM and ELKS2β
Ap3s1	3	2	1	RIM and ELKS2β
Arfgap1	2	2	1	RIM and ELKS2β
Atp6v0d1	2	2.5	1	RIM and ELKS2β
Atp6v1a	2.40934	3.19505	1.32692	RIM and ELKS2β
Atp6v1d	2.5	2.5	1	RIM and ELKS2β
Atp6v1e1	4.5	8.5	1	RIM and ELKS2β
Atp6v1e2	2	5	1	RIM and ELKS2β
Basp1	2.07143	4.0119	1.7381	RIM and ELKS2β
Bin1	4.625	4.875	1.875	RIM and ELKS2β
Cadm2	4.25	2.5	1.5	RIM and ELKS2β
Cadm3	2.16667	3.33333	1	RIM and ELKS2β
Calb1	3	2.5	1	RIM and ELKS2β
Calb2	5.5	5.33333	1.16667	RIM and ELKS2β
Calml3	2	3	0.75	RIM and ELKS2β
Canx	6.25	7	0.75	RIM and ELKS2β
Cbr1	4.7	4.4	0.7	RIM and ELKS2β
Cct2	4.5	2	1	RIM and ELKS2β
Cct4	2.25	6.25	0.75	RIM and ELKS2β
Cct7	2.08333	2	0.833333	RIM and ELKS2β
Cmpk1	4.33333	4.16667	1.66667	RIM and ELKS2β
Ctsd	2.16667	5.5	0.833333	RIM and ELKS2β
Cyb5r1	2	3.5	1	RIM and ELKS2β
Dctn4	2	2.75	1.25	RIM and ELKS2β
Dpp10	3.14286	4	1.28571	RIM and ELKS2β
Dpysl3	4.55556	8.16667	1.27778	RIM and ELKS2β
Dtd1	2.33333	4	1.16667	RIM and ELKS2β
Dync1li1	2.5	3	1	RIM and ELKS2β
Dynlrb1	2.5	3.5	1	RIM and ELKS2β
Eif4a1	2.75	2	1.25	RIM and ELKS2β
Elob	2	3	1	RIM and ELKS2β
Fabp3	3.5	2	1	RIM and ELKS2β
Fabp5	2	5	1	RIM and ELKS2β
Fh	7.25	7.8125	0.625	RIM and ELKS2β
Gfap	4	6	1	RIM and ELKS2β
Gja1	3.05556	5.02778	1.91667	RIM and ELKS2β
Glo1	5.5	4.5	1	RIM and ELKS2β
Gng7	2.25	3.25	0.75	RIM and ELKS2β
Gphn	2.3	2.1	0.7	RIM and ELKS2β
Gspt2	2	2	1	RIM and ELKS2β
Hba	2.04464	2.97321	1.05357	RIM and ELKS2β
Hist1h2ad	2.875	3.375	0.958333	RIM and ELKS2β
Hk1	2.16667	2	0.666667	RIM and ELKS2β
Hp	2	3	1	RIM and ELKS2β
Hprt1	2	3.5	1	RIM and ELKS2β
Hyou1	2	2.5	1	RIM and ELKS2β
Itpr1	4.5	2	1.5	RIM and ELKS2β
L1cam	3.5	3.5	1.25	RIM and ELKS2β
Lmna	3	4	1	RIM and ELKS2β
Lmnb2	4	2.5	1	RIM and ELKS2β
Lta4h	3	3.5	0.75	RIM and ELKS2β
Mapre3	7	5	1	RIM and ELKS2β
Napa	4.5	6.66667	1	RIM and ELKS2β
Napg	3.125	2.625	0.625	RIM and ELKS2β
Ndrg2	2.38889	2.77778	1.33333	RIM and ELKS2β
Nefh	2.875	2.375	1.25	RIM and ELKS2β
Nefm	3.11111	3.02778	0.902778	RIM and ELKS2β
Nsfl1c	3	3.5	1	RIM and ELKS2β
Pak1	2	3.5	1	RIM and ELKS2β
Pcbp3	4	2.5	1.5	RIM and ELKS2β
Pdia3	3	5	1	RIM and ELKS2β
Pdxp	2.5	2.5	1	RIM and ELKS2β
Pgd	3.625	2.125	0.625	RIM and ELKS2β
Pgk1	2.67857	2.28095	1.30476	RIM and ELKS2β
Pgm1	4.5	2.33333	0.916667	RIM and ELKS2β
Pitpna	2.3	4	0.7	RIM and ELKS2β
Ppib	2	2.5	1	RIM and ELKS2β
Ppp1r9a	2.5	2.5	1	RIM and ELKS2β
Prkar2a	2	2.5	1	RIM and ELKS2β
Prkca	2.8125	3.1875	0.6875	RIM and ELKS2β
Prrt2	2.1	2	1	RIM and ELKS2β
Psma1	2.5	2	1	RIM and ELKS2β
Psma7	2.33333	2	0.666667	RIM and ELKS2β
Psmb1	2.5	5	1	RIM and ELKS2β
Psmb3	2.5	2.5	1.5	RIM and ELKS2β
Psmd12	2.5	3	1.5	RIM and ELKS2β
Pura	2.28846	2.05769	1.25962	RIM and ELKS2β
Rab11b	4	5.5	1	RIM and ELKS2β
Rab2a	5.17857	3.10714	1.28571	RIM and ELKS2β
Rab6a	2	2	1	RIM and ELKS2β
Rab6b	3	2	0.75	RIM and ELKS2β
Rab7a	2.36364	2.70455	1	RIM and ELKS2β
Rala	2.5	2.5	1.5	RIM and ELKS2β
Rap1gap	5	4	1	RIM and ELKS2β
Rpl7a	3	3	1.5	RIM and ELKS2β
Rpl8	2	2	1.5	RIM and ELKS2β
Sec22b	2.08333	2.58333	1.16667	RIM and ELKS2β
Sept3	2.5	4.75	1.9375	RIM and ELKS2β
Serpina3k	3	2.25	1.25	RIM and ELKS2β
Shank3	2.5	2.5	1	RIM and ELKS2β
Sirt2	2.5	3.57692	0.923077	RIM and ELKS2β
Sncb	7	3.25	1.75	RIM and ELKS2β
Sncg	3	2.5	1	RIM and ELKS2β
Srr	2.5	3	1	RIM and ELKS2β
Stip1	4.25	4.875	0.875	RIM and ELKS2β
Stx1a	3.75	4.41667	1.16667	RIM and ELKS2β
Stx1b	2.825	4.1	1.875	RIM and ELKS2β
Sugt1	2.5	2	1	RIM and ELKS2β
Tnr	2.23496	2.06579	1.57143	RIM and ELKS2β
Tpm2	2	2.5	1	RIM and ELKS2β
Uba5	2	2.5	1	RIM and ELKS2β
Ube2n	5	4.5	1	RIM and ELKS2β
Vamp1	2	2	1	RIM and ELKS2β
Vat1l	3	3.75	0.75	RIM and ELKS2β
Vim	2.5	2	1	RIM and ELKS2β
Ywhae	2.01748	2.41259	1.03846	RIM and ELKS2β
Ap1s1	1	7	3	ELKS2β and CaVβ4
Appl1	1	2	2	ELKS2β and CaVβ4
Atp6v0a1	1.125	2.625	2.125	ELKS2β and CaVβ4
Atp6v1g2	1	4	2	ELKS2β and CaVβ4
Cct6b	1	2	2	ELKS2β and CaVβ4
Gng3	1.5	2.5	2.5	ELKS2β and CaVβ4
Hbbt1	1	3	2	ELKS2β and CaVβ4
Kbtbd11	1.08333	2.33333	2.75	ELKS2β and CaVβ4
Kif21a	0.954545	2.31818	2.72727	ELKS2β and CaVβ4
Larp1	1	2.5	2.5	ELKS2β and CaVβ4
Lypla2	1	2.25	3.75	ELKS2β and CaVβ4
Mtco2	1	3	2	ELKS2β and CaVβ4
Plec	1.25	2.25	2.5	ELKS2β and CaVβ4
Plg	1	2	2	ELKS2β and CaVβ4
Psmb6	1.375	3.25	2.5	ELKS2β and CaVβ4
Rhog	1.40909	7.90909	2.90909	ELKS2B and CavB4
Rpl17	1	2	2	ELKS2β and CaVβ4
Scrn1	1	2.5	2.5	ELKS2β and CaVβ4
Serbp1	1	3.5	2.5	ELKS2β and CaVβ4
Slc16a1	1	3.5	5	ELKS2β and CaVβ4
Slc6a1	1.875	2.125	3.5625	ELKS2β and CaVβ4
Usp5	1.85	3.175	3.25	ELKS2β and CaVβ4
Vps26a	0.9	2.3	2.7	ELKS2β and CaVβ4
A0A097PUD0	2.5	1.5	2	RIM and Cavβ4
Bsn	2.58333	1.69444	3.30556	RIM and Cavβ4
Cacng8	2	1.83333	3.33333	RIM and Cavβ4
Camk2a	2.78966	1.93621	2.13621	RIM and Cavβ4
Cfl1	2.4375	1.31731	2.08173	RIM and Cavβ4
Kif5c	2	1.5	2.25	RIM and Cavβ4
Madd	4	1	2	RIM and Cavβ4
Rab8b	3.25	0.75	2.25	RIM and Cavβ4
Sacm1l	2	1	2	RIM and Cavβ4
Slc12a2	2.75	1.75	2.75	RIM and Cavβ4
Slc24a2	4	1	3	RIM and Cavβ4
Slc2a13	2	1.5	3	RIM and Cavβ4
Srcin1	2.5	1.5	2.25	RIM and Cavβ4
Aamdc	2.5	0.833333	1	RIM only
Abhd16a	3	1	1.5	RIM only
Acta2	2.25	1.25	1.58333	RIM only
Actn3	5.5	1	1	RIM only
Actn4	4.5	1.5	1	RIM only
Adgrl1	2.5	1	1	RIM only
Adssl1	2	1	1	RIM only
Agap3	2	1	1	RIM only
Anln	2	1	1	RIM only
Aqp4	3.9	0.9	1	RIM only
Arf2	2.03571	1.96429	1.125	RIM only
Armc1	2.5	1	1	RIM only
Atp6v1c1	2.5	1.75	1.75	RIM only
Atp6v1h	2.06044	1.17033	0.826923	RIM only
Banf1	2.5	1	1	RIM only
Blvra	2	1	1	RIM only
Cct3	2.5	1.5	0.75	RIM only
Chl1	2	1	1	RIM only
Cmas	3	1	1.5	RIM only
Cnrip1	2.79167	0.583333	0.916667	RIM only
Cotl1	2.66667	1.16667	0.666667	RIM only
Cpne6	2.125	1.75	1.125	RIM only
Crym	2	1.6954	1.16379	RIM only
Dad1	2	1	1	RIM only
Dbn1	2	1.5	1	RIM only
Ddt	2	1.75	0.75	RIM only
Ddx1	2.5	1	1	RIM only
Dhx9	2	1	1	RIM only
Dlg1	3	1	1	RIM only
Dync1i1	2.07143	1.92857	0.857143	RIM only
Dync1li2	3.16667	1.5	0.666667	RIM only
Fkbp2	2.5	1.25	1.75	RIM only
Fxyd6	2.04167	1.29167	0.625	RIM only
Gdap1l1	2.91667	1.83333	0.833333	RIM only
Gdpd1	3	1.5	1.5	RIM only
Gmfb	2.25	1.75	1.25	RIM only
Gna11	2.5	1.5	1	RIM only
Gnl1	2.5	1	1.5	RIM only
Gpd1	2	1.5	1	RIM only
Gsk3a	2.25	1.08333	0.666667	RIM only
Gsk3b	2	1.5	1.5	RIM only
Gstm1	3.17273	1.66364	0.681818	RIM only
Gstm5	6.2	1.5	0.8	RIM only
Gucy1b3	2	1.5	1	RIM only
Hcn2	2.5	1	1	RIM only
Hmgb1	2	1	1	RIM only
Hnrnpm	2.5	1.5	1	RIM only
Hpca	2.75	1.25	0.75	RIM only
Ina	2.11722	1.46172	0.825359	RIM only
Lingo1	3.5	1	1	RIM only
Map2k1	3	0.8125	0.875	RIM only
Mapk1	2.16667	0.5	0.333333	RIM only
Mapk3	2	1	1.5	RIM only
Masp1	2.625	1.25	1.5	RIM only
Mink1	3.25	0.75	1.25	RIM only
Myh7b	2.5	1	1	RIM only
Myo1d	2	1	1	RIM only
Myo5b	2	1	1	RIM only
Nars	2.18182	0.772727	0.590909	RIM only
Nf1	2	1	1	RIM only
Npepps	2.26667	1.4	0.766667	RIM only
Nrcam	3	1.16667	0.666667	RIM only
Ogt	3	1.5	1	RIM only
Pacsin1	2.5375	1.875	0.5125	RIM only
Pde10a	3.83333	1.95833	1.04167	RIM only
Pgam2	2.16667	1.83333	1.58333	RIM only
Phgdh	2.08333	1.75	0.833333	RIM only
Ppp2ca	2.71429	1.71429	1.28571	RIM only
Prep	2.28571	0.571429	1.85714	RIM only
Psmb4	3.5	1	1	RIM only
Purb	2	1.5	0.5	RIM only
Rap2c	2	1	1	RIM only
Rheb	4.5	1.5	1	RIM only
Rhoc	5.41667	1.16667	1.58333	RIM only
Rnpep	2.21429	1	1.07143	RIM only
Rps14	2	1	0.75	RIM only
Sccpdh	2	1.5	1	RIM only
Sec23a	2.5	1.5	1	RIM only
Sept6	2.93333	1.63889	0.883333	RIM only
Serpinb1a	2	1	1	RIM only
Slc1a4	2.16667	1.16667	1.66667	RIM only
Slc6a17	2.3125	1	1.6875	RIM only
Snrpb	2	1	1	RIM only
Snrpd2	3	1	1	RIM only
Snrpd3	3	1	1	RIM only
Syn1	2.34077	1.64402	0.877282	RIM only
Syt1	2.23775	1.92034	0.987745	RIM only
Thy1	2.75	1.875	0.875	RIM only
Tmem35a	3.375	1.125	1	RIM only
Tpp2	2.7	1.5	1	RIM only
Tpt1	3	1	1	RIM only
Trappc4	4	1.5	1	RIM only
Try10	2.25	1.375	0.75	RIM only
Tuba3a	3	1	1	RIM only
Txnl1	2.91667	0.833333	0.916667	RIM only
Wars	2	1	1	RIM only
Wdr44	2	1.33333	0.833333	RIM only
Xpo7	2	1	1	RIM only
Ywhah	2.7125	0.875	0.875	RIM only
Actr1a	1.25	3.5	1.5	ELKS2β only
Actr1b	1.57143	6.28571	0.857143	ELKS2β only
Actr3	1	4	1	ELKS2β only
Adam23	1	2.4	1.6	ELKS2β only
Ap1b1	1	2.25	0.75	ELKS2β only
Ap3m2	0.9	2.6	0.7	ELKS2β only
Apoa1	1	3	1	ELKS2β only
Apoe	1	2.5	1	ELKS2β only
Arhgap1	1	2.5	0.75	ELKS2β only
Arhgdia	1.32051	2.24359	1.52137	ELKS2β only
Arpc4	1.79167	2.625	1.29167	ELKS2β only
Arpc5l	1	4	1	ELKS2β only
Asns	1	2	1	ELKS2β only
Atp2b3	1.97222	2.5	1.94444	ELKS2β only
Baiap2	1	2	1	ELKS2β only
Bcap31	1	2	1	ELKS2β only
Bsg	1	4	1	ELKS2β only
Btf3l4	1	3.5	1	ELKS2β only
C2cd2l	1	3.5	1	ELKS2β only
Calr	0.8125	3.5625	0.5625	ELKS2β only
Camk4	1	3.5	1	ELKS2β only
Cap2	1.8	2.2	1.13333	ELKS2β only
Capza1	1	2.5	1	ELKS2β only
Capza2	1.40278	2.54167	0.861111	ELKS2β only
Cct6a	1.41667	2.91667	0.666667	ELKS2β only
Cd200	1.5	3.5	1	ELKS2β only
Cdh13	1	2	1	ELKS2β only
Clic4	1	2.5	1.5	ELKS2β only
Cndp2	1.5	2	1	ELKS2β only
Col19a1	1	2.5	1	ELKS2β only
Cops3	0.75	3.25	0.75	ELKS2β only
Cops4	1	4	1	ELKS2β only
Cops5	1	2.25	0.75	ELKS2β only
Cops7a	1	2.5	1	ELKS2β only
Cplx1	1	2	1	ELKS2β only
Crk	1	2	1	ELKS2β only
Crmp1	1.65521	2.14523	0.659645	ELKS2β only
Cspg5	1	2	1	ELKS2β only
Cst3	1	2	1.5	ELKS2β only
Ctbp1	0.833333	3.16667	1	ELKS2β only
Ctnna2	1	2	1	ELKS2β only
Ctnnb1	0.961538	5.96154	0.846154	ELKS2β only
Ctsl	1	2.5	1	ELKS2β only
Cul3	1	2.5	1.5	ELKS2β only
Dctn2	1	4.5	1	ELKS2β only
Dctn3	1	2	1	ELKS2β only
Dlg2	1	2	1	ELKS2β only
Dlg4	1	2	1	ELKS2β only
Dpysl4	1.875	5.29167	1.125	ELKS2β only
Dst	1	2.5	1	ELKS2β only
Dusp3	1	3.5	1	ELKS2β only
Dynll1	1.5	2	1.5	ELKS2β only
Eef1b	1.5	4.5	1.5	ELKS2β only
Efhd2	1	2.5	1	ELKS2β only
Eif4a2	1.73333	2.10833	1	ELKS2β only
Eif4h	1	4	1	ELKS2β only
Elavl3	0.75	2.25	1.5	ELKS2β only
Eloc	1	2	1	ELKS2β only
Emc3	1	2	1	ELKS2β only
Epb41l2	1.81579	2.17763	1.09868	ELKS2β only
Epn1	1	2	1	ELKS2β only
Erc1	1	2	1	ELKS2β only
Ezr	1	3.5	1	ELKS2β only
Fahd2	0.625	2.25	0.625	ELKS2β only
Fam98b	1	2	1	ELKS2β only
Farp1	1.25	2	0.75	ELKS2β only
Gad2	1	3.5	1	ELKS2β only
Gas7	1	2	1	ELKS2β only
Gmfg	1	2	1	ELKS2β only
Gnal	1.66667	3.16667	1	ELKS2β only
Gnaq	1.5	3.5	1	ELKS2β only
Gnas	1	2	0.75	ELKS2β only
Gnb5	1.07143	2.07143	0.785714	ELKS2β only
H2afz	1	3	1	ELKS2β only
Hapln1	0.875	2.25	1.25	ELKS2β only
Hmgb3	1	2	1	ELKS2β only
Hnrnpa1	1	3	1.5	ELKS2β only
Hnrnpa2b1	1	4	1	ELKS2β only
Hnrnpc	1	2	1.5	ELKS2β only
Hnrnpk	1.66667	3	0.666667	ELKS2β only
Hnrnpl	1.3	3.4	0.7	ELKS2β only
Hsp90aa1	0.922619	2.03571	0.690476	ELKS2β only
Hsp90b1	1.75	2.125	0.625	ELKS2β only
Hspa1b	1.25	2.22222	0.805556	ELKS2β only
Hspa5	1.96667	2.15	0.933333	ELKS2β only
Ilf2	1	2	1	ELKS2β only
Itih3	1	3	1	ELKS2β only
JPT1	1	2	1	ELKS2β only
Kcnab2	1.75	2.25	1	ELKS2β only
Kif21b	1	2	1.5	ELKS2β only
Kif5b	1	2.5	1	ELKS2β only
Klhl1	1	2	1	ELKS2β only
Krt24	1	4	1	ELKS2β only
Lancl2	1	2	1	ELKS2β only
Lgalsl	1.5	3.5	1	ELKS2β only
Lmnb1	1	2	1	ELKS2β only
Lyz1	1	2	1	ELKS2β only
Map4	0.75	2.28571	1.14286	ELKS2β only
Mbp	1.88211	2.70316	1.04105	ELKS2β only
Nap1l4	1	2	1	ELKS2β only
Ncald	1	2.5	1	ELKS2β only
Ncan	1	3	1	ELKS2β only
Ndrg1	1.5	2	1	ELKS2β only
Ndrg3	1	2	1	ELKS2β only
Nebl	1	5.5	1	ELKS2β only
Nefl	1.56119	2.06294	0.643357	ELKS2β only
Nono	1.5	3.5	0.75	ELKS2β only
Npm1	1.5	3	1	ELKS2β only
Ntm	0.666667	3	1.33333	ELKS2β only
Nudc	1	2.5	1	ELKS2β only
Ola1	1	2.5	1	ELKS2β only
Oscp1	1	2.5	1	ELKS2β only
Pabpc1	1.5	2	1	ELKS2β only
Pak2	1	2.5	1	ELKS2β only
Pcdh1	1.5	6.5	1	ELKS2β only
Pcp4	1.5	15	1	ELKS2β only
Pcp4l1	1	3	1	ELKS2β only
Pcsk1n	1	5	1	ELKS2β only
Pde1a	1.125	3	1	ELKS2β only
Pdpk1	1	2.5	1	ELKS2β only
Pfn2	0.785714	2.28571	1.35714	ELKS2β only
Pgrmc1	1	2	1.5	ELKS2β only
Phf24	0.666667	2.33333	0.666667	ELKS2β only
Pi4ka	1	2.35714	0.571429	ELKS2β only
Pip5k1c	1.5	2	1	ELKS2β only
Plaa	1	3.5	1	ELKS2β only
Plpp3	1.625	2.375	1.875	ELKS2β only
Ppa1	1	8	1	ELKS2β only
Ppp1r7	1	3	1	ELKS2β only
Ppp1r9b	1	2	1	ELKS2β only
Ppp2r1a	1.5	3	1.5	ELKS2β only
Ppp2r2c	0.833333	2.16667	0.666667	ELKS2β only
Ppp3ca	1.75	2.475	1	ELKS2β only
Ppp3cb	1.8	3.6	1.4	ELKS2β only
Psma2	1	2.5	1	ELKS2β only
Psma3	1.5	2	1	ELKS2β only
Psma5	1.25	2.75	0.75	ELKS2β only
Psmc3	1	2	1	ELKS2β only
Psmc5	1	2	1	ELKS2β only
Psmd4	1	2.5	1	ELKS2β only
Pzp	1	3	1	ELKS2β only
Rab4b	1	2	1	ELKS2β only
Rap1gds1	1.25	2.75	0.75	ELKS2β only
Rap2a	1	2	1	ELKS2β only
Rph3a	1.72222	3.5	1.55556	ELKS2β only
Rpl11	1	2	1	ELKS2β only
Rpl28	1	2.5	1	ELKS2β only
Rpl6	1.5	2	1.5	ELKS2β only
Rps15a	1	2	1	ELKS2β only
Rps4x	1	2	1	ELKS2β only
Rps8	1.7	2.2	0.7	ELKS2β only
Rps9	1.25	2.75	1.75	ELKS2β only
Rpsa	1	2	1	ELKS2β only
Rufy3	1.5	2.5	1	ELKS2β only
Scg2	1	2	1	ELKS2β only
Sept4	1	3.5	1	ELKS2β only
Sept9	1	2.5	1	ELKS2β only
Serpina1b	1	2.5	1	ELKS2β only
Sfpq	0.666667	2.16667	0.666667	ELKS2β only
Sh3bgrl	1	2	1	ELKS2β only
Skp1	1.25	3.25	1.25	ELKS2β only
Slc6a9	1	3	1.5	ELKS2β only
Slc9a3r1	1	3	1	ELKS2β only
Snap25	1.24	2.045	1.085	ELKS2β only
Snx2	1	2	1	ELKS2β only
Soga3	1	2	1	ELKS2β only
Src	1.66667	4.33333	1.33333	ELKS2β only
Stmn1	1	4	1	ELKS2β only
Strn	1	2	1	ELKS2β only
Sult4a1	1	2	1	ELKS2β only
Svip	1	2.5	1	ELKS2β only
Syn3	1.25	2	1.25	ELKS2β only
Synpo	1.42857	5.64286	0.714286	ELKS2β only
Tagln2	1	2	1	ELKS2β only
Tagln3	1.125	4.625	0.75	ELKS2β only
Tceal5	1	3	1	ELKS2β only
Tln2	1	3	1	ELKS2β only
Tmem30a	1	2	1	ELKS2β only
Tmod2	1	4.5	1	ELKS2β only
Tmx4	1	2	1	ELKS2β only
Tpd52l2	1	2	1	ELKS2β only
Tpm1	1	3	1	ELKS2β only
Tpm3	1	4.5	1	ELKS2β only
Tpr	1	2	1	ELKS2β only
Tprg1l	0.875	2.125	0.625	ELKS2β only
Trim61	1	2	1	ELKS2β only
Tubb2a	1	4	1.9	ELKS2β only
Tubb4b	1.5	2.25	1.5	ELKS2β only
Twf1	1.5	4.125	0.875	ELKS2β only
Twf2	1.2	2.4	0.6	ELKS2β only
Txn	1.5	11	1	ELKS2β only
Ube2m	1.5	2	1	ELKS2β only
Ube2v2	1	4	1	ELKS2β only
Ubqln4	1	2.5	1	ELKS2β only
Uchl1	1.11538	2.54396	0.89011	ELKS2β only
Uchl3	1	3	1	ELKS2β only
Usp14	1.16667	6	1	ELKS2β only
Vamp2	1.83333	2.25	0.833333	ELKS2β only
Vapb	1	4.5	1	ELKS2β only
Vcp	1.83333	2.16667	0.651515	ELKS2β only
Vps35	0.833333	2	0.833333	ELKS2β only
Wee2	1	2	1	ELKS2β only
Wipf3	0.75	2.5	0.75	ELKS2β only
Add3	1.33333	0.766667	3.73333	Cavβ4 only
C1qb	1	1	2.5	Cavβ4 only
Cacna1a	1	1	2.5	Cavβ4 only
Cacna1b	1	1	6	Cavβ4 only
Cacna1e	1	1	4	Cavβ4 only
Cacnb1	1	1	12.5	Cavβ4 only
Cbarp	1	1	6	Cavβ4 only
Cdk5	1.85	1.8	2.1	Cavβ4 only
Dync1i2	1.25	1	2.33333	Cavβ4 only
Fam49a	1.4	1.5	3.6	Cavβ4 only
Gucy1a2	1.5	1	2	Cavβ4 only
Hdac11	1	0.75	2.75	Cavβ4 only
Isoc1	1.75	1	2.75	Cavβ4 only
Kcnj10	1	1	3	Cavβ4 only
Kcnma1	0.75	0.75	2	Cavβ4 only
Lrguk	1	1	2.5	Cavβ4 only
Lsamp	1.5	1.5	2	Cavβ4 only
Mlc1	0.75	0.75	3	Cavβ4 only
Myo5a	0.5	1.35714	2.82143	Cavβ4 only
Padi2	1.5	1.5	2	Cavβ4 only
Pdxk	0.861111	1	2	Cavβ4 only
Pgm3	1	1.5	2	Cavβ4 only
Pllp	0.916667	1.08333	2	Cavβ4 only
Ppm1e	1.5	1.25	3	Cavβ4 only
Ptprz1	1.825	1.85	2.025	Cavβ4 only
Rpl5	1	1	5	Cavβ4 only
Rpn2	1.45455	1.86364	2.68182	Cavβ4 only
Rps7	1	1	2	Cavβ4 only
Serpind1	1.625	1.875	2.25	Cavβ4 only
Slc6a7	1.3	1.1	2.1	Cavβ4 only
Tmem33	1	1	2	Cavβ4 only
Unc13c	1	1	2	Cavβ4 only
Vps29	0.875	1	4.625	Cavβ4 only
Wwc2	1	1	3	Cavβ4 only

## Sheet: Fig.2S1-SD1 Venn 1.5-fold
Figure 2 - figure supplement 1 - Source Data 1
control (threshold 1.5)
Gene	RIMPPCP (fold change)	ELKS2β (fold change)	CaVβ4 (fold change)	Enrichment Group
Rims1	4.5	3.33333	13.3333	ALL
Erc2	1	32	4	ELKS2β and CaVβ4
Cacnb4	1	1	37.5	CaVβ4 only
A0A097PUD0	2.5	1.5	2	ALL
Abcb8	1.5	2.5	1.5	ALL
Acacb	1.75	1.75	3.5	ALL
Acot13	3.41667	2.75	1.83333	ALL
Acsbg1	4.375	4.1875	3.625	ALL
Actr2	4.14286	6.28571	1.85714	ALL
Ak1	5	3.25	1.75	ALL
Akap5	5.5	13	4.13636	ALL
Alcam	3.91667	2.25	1.91667	ALL
Aldh2	2.3	2	1.85	ALL
Aldh9a1	1.5	1.5	1.5	ALL
Ap1g1	3.5	2	2	ALL
Atp2b3	1.97222	2.5	1.94444	ALL
Atp5c1	3.42857	6.78571	1.78571	ALL
Atp5f1	5.625	6.5625	2.5625	ALL
Atp6v1c1	2.5	1.75	1.75	ALL
Basp1	2.07143	4.0119	1.7381	ALL
Bin1	4.625	4.875	1.875	ALL
Bsn	2.58333	1.69444	3.30556	ALL
C1qbp	2.5	2.5	1.5	ALL
Cacng8	2	1.83333	3.33333	ALL
Cadm2	4.25	2.5	1.5	ALL
Calm2	2.78571	6.85714	2.07143	ALL
Camk2a	2.78966	1.93621	2.13621	ALL
Cdipt	1.57143	1.71429	1.85714	ALL
Cdk5	1.85	1.8	2.1	ALL
Cend1	2.16667	3.58333	2.25	ALL
Cisd1	2.5	6.16667	2.08333	ALL
Cmpk1	4.33333	4.16667	1.66667	ALL
Crip2	4.5	3	2	ALL
Dnajc5	3	4.5	2	ALL
Dynll1	1.5	2	1.5	ALL
Eef1b	1.5	4.5	1.5	ALL
Etfb	3.5	3	1.5	ALL
Fn1	1.5	1.5	1.5	ALL
Gabbr1	1.5	1.5	1.5	ALL
Gabbr2	3.75	2.25	4.75	ALL
Gdpd1	3	1.5	1.5	ALL
Gja1	3.05556	5.02778	1.91667	ALL
Gng2	3	4	2.5	ALL
Gng3	1.5	2.5	2.5	ALL
Gsk3b	2	1.5	1.5	ALL
Gsr	2.66667	2.5	5.5	ALL
Gstz1	2.5	2	1.5	ALL
Hadhb	2	5.25	1.5	ALL
Hepacam	3.44444	2.5	3	ALL
Hist1h1d	2.5	5	2.5	ALL
Hist1h4a	4.38095	6.5	2.59524	ALL
Hpcal1	3.66667	6.66667	2.66667	ALL
Hsd17b10	1.88462	2.26923	1.96154	ALL
Hspd1	4.55	4.51667	1.61667	ALL
Huwe1	2	2	2.5	ALL
Iqsec1	2	2.875	3.75	ALL
Itpa	2	3.5	2.5	ALL
Itpr1	4.5	2	1.5	ALL
Kif5c	2	1.5	2.25	ALL
Lsamp	1.5	1.5	2	ALL
Mpi	2	5	3.5	ALL
Mtch1	2	5.5	1.92857	ALL
Naca	4.5	2.5	2	ALL
Napb	6.63636	9.31818	2.04545	ALL
Ncam2	2.19118	2.33824	4.32353	ALL
Nckap1	4	3.02381	6.30952	ALL
Nme1	4.83333	5.83333	3.16667	ALL
Nptn	13.9	8.7	2.1	ALL
Nt5dc3	4	2	3.5	ALL
Padi2	1.5	1.5	2	ALL
Palm	2.78333	4.01667	2.41667	ALL
Pcbp3	4	2.5	1.5	ALL
Pgam2	2.16667	1.83333	1.58333	ALL
Plpp3	1.625	2.375	1.875	ALL
Ppp2r1a	1.5	3	1.5	ALL
Ppp3cc	1.55556	1.77778	1.77778	ALL
Prrt3	4.5	2	3.5	ALL
Psmb3	2.5	2.5	1.5	ALL
Psmd1	5	2.5	2.5	ALL
Psmd12	2.5	3	1.5	ALL
Psmd3	2.58333	2.75	6.875	ALL
Ptprz1	1.825	1.85	2.025	ALL
Rab1b	4.1	3.7	4.7	ALL
Rab35	3.21429	3.78571	2.85714	ALL
Rab5a	5.375	5.5	2.8125	ALL
Rala	2.5	2.5	1.5	ALL
Rap1a	3	4.5	2.5	ALL
Rhot1	2.5	2.5	1.5	ALL
Rph3a	1.72222	3.5	1.55556	ALL
Rpl6	1.5	2	1.5	ALL
Rpl7a	3	3	1.5	ALL
Rpl8	2	2	1.5	ALL
Rps2	2.5	2.5	2	ALL
Scamp3	2	2	2.5	ALL
Scn4a	1.5	1.5	1.5	ALL
Sept11	1.54762	1.87698	1.56746	ALL
Sept3	2.5	4.75	1.9375	ALL
Serpind1	1.625	1.875	2.25	ALL
Sh3gl1	2.5	2.5	2	ALL
Sh3gl2	2.25	4.25	2	ALL
Slc12a2	2.75	1.75	2.75	ALL
Slc2a13	2	1.5	3	ALL
Slc2a3	4.4	4	4.5	ALL
Slc3a2	6.46429	8.92857	3.53571	ALL
Slc6a1	1.875	2.125	3.5625	ALL
Snca	2.875	7.625	2	ALL
Sncb	7	3.25	1.75	ALL
Sod1	1.97917	2.70833	3.64583	ALL
Srcin1	2.5	1.5	2.25	ALL
Stx1b	2.825	4.1	1.875	ALL
Sv2a	2.51515	2.15909	2.92424	ALL
Tnr	2.23496	2.06579	1.57143	ALL
Tubb4b	1.5	2.25	1.5	ALL
Usp5	1.85	3.175	3.25	ALL
Vdac1	4.78571	6.28571	3.07143	ALL
Vsnl1	3.9375	4.625	3	ALL
Abi1	2	2	1	RIM and ELKS2β
Acaa2	1.5	3	1	RIM and ELKS2β
Aco1	1.5	1.5	1	RIM and ELKS2β
Acot10	2.5	1.5	1	RIM and ELKS2β
Acp1	1.83333	1.5	0.833333	RIM and ELKS2β
Actn4	4.5	1.5	1	RIM and ELKS2β
Actr1b	1.57143	6.28571	0.857143	RIM and ELKS2β
Add2	2	3.10294	0.764706	RIM and ELKS2β
Ahcy	1.78571	1.95238	0.452381	RIM and ELKS2β
Akr1b1	2.05	3.1	0.85	RIM and ELKS2β
Alb	1.72222	1.63889	0.833333	RIM and ELKS2β
Aldh1l1	1.7	3.05	1	RIM and ELKS2β
Amph	2.5	9	1	RIM and ELKS2β
Ap3s1	3	2	1	RIM and ELKS2β
Apoo	2.25	2.25	1	RIM and ELKS2β
Arf2	2.03571	1.96429	1.125	RIM and ELKS2β
Arfgap1	2	2	1	RIM and ELKS2β
Arpc4	1.79167	2.625	1.29167	RIM and ELKS2β
Ass1	1.58333	1.58333	1.16667	RIM and ELKS2β
Atl1	1.66667	1.5	1.16667	RIM and ELKS2β
Atp5j2	2.75	2.16667	1	RIM and ELKS2β
Atp6v0d1	2	2.5	1	RIM and ELKS2β
Atp6v1a	2.40934	3.19505	1.32692	RIM and ELKS2β
Atp6v1d	2.5	2.5	1	RIM and ELKS2β
Atp6v1e1	4.5	8.5	1	RIM and ELKS2β
Atp6v1e2	2	5	1	RIM and ELKS2β
Brsk1	1.5	1.66667	0.833333	RIM and ELKS2β
Cadm3	2.16667	3.33333	1	RIM and ELKS2β
Calb1	3	2.5	1	RIM and ELKS2β
Calb2	5.5	5.33333	1.16667	RIM and ELKS2β
Calml3	2	3	0.75	RIM and ELKS2β
Canx	6.25	7	0.75	RIM and ELKS2β
Cap2	1.8	2.2	1.13333	RIM and ELKS2β
Cbr1	4.7	4.4	0.7	RIM and ELKS2β
Cct2	4.5	2	1	RIM and ELKS2β
Cct3	2.5	1.5	0.75	RIM and ELKS2β
Cct4	2.25	6.25	0.75	RIM and ELKS2β
Cct7	2.08333	2	0.833333	RIM and ELKS2β
Cd200	1.5	3.5	1	RIM and ELKS2β
Ckmt1	2.09211	2.75877	0.622807	RIM and ELKS2β
Cndp2	1.5	2	1	RIM and ELKS2β
Cpne6	2.125	1.75	1.125	RIM and ELKS2β
Cpne7	1.5	1.5	1	RIM and ELKS2β
Crmp1	1.65521	2.14523	0.659645	RIM and ELKS2β
Crym	2	1.6954	1.16379	RIM and ELKS2β
Ctsd	2.16667	5.5	0.833333	RIM and ELKS2β
Cyb5r1	2	3.5	1	RIM and ELKS2β
Dbn1	2	1.5	1	RIM and ELKS2β
Dctn4	2	2.75	1.25	RIM and ELKS2β
Ddt	2	1.75	0.75	RIM and ELKS2β
Dnm1l	2.33333	3	0.666667	RIM and ELKS2β
Dpp10	3.14286	4	1.28571	RIM and ELKS2β
Dpysl3	4.55556	8.16667	1.27778	RIM and ELKS2β
Dpysl4	1.875	5.29167	1.125	RIM and ELKS2β
Dtd1	2.33333	4	1.16667	RIM and ELKS2β
Dync1i1	2.07143	1.92857	0.857143	RIM and ELKS2β
Dync1li1	2.5	3	1	RIM and ELKS2β
Dync1li2	3.16667	1.5	0.666667	RIM and ELKS2β
Dynlrb1	2.5	3.5	1	RIM and ELKS2β
Eci1	1.5	2.5	1	RIM and ELKS2β
Eif4a1	2.75	2	1.25	RIM and ELKS2β
Eif4a2	1.73333	2.10833	1	RIM and ELKS2β
Elob	2	3	1	RIM and ELKS2β
Epb41l2	1.81579	2.17763	1.09868	RIM and ELKS2β
Fabp3	3.5	2	1	RIM and ELKS2β
Fabp5	2	5	1	RIM and ELKS2β
Fh	7.25	7.8125	0.625	RIM and ELKS2β
Fkbp1a	1.5	1.5	0.75	RIM and ELKS2β
Fkbp8	1.5	1.5	1	RIM and ELKS2β
Gabra3	1.5	1.5	1	RIM and ELKS2β
Gdap1l1	2.91667	1.83333	0.833333	RIM and ELKS2β
Gfap	4	6	1	RIM and ELKS2β
Ggct	1.5	1.5	1	RIM and ELKS2β
Glo1	5.5	4.5	1	RIM and ELKS2β
Glod4	2	3.5	1	RIM and ELKS2β
Glud1	1.91597	1.73109	1.03151	RIM and ELKS2β
Gmfb	2.25	1.75	1.25	RIM and ELKS2β
Gna11	2.5	1.5	1	RIM and ELKS2β
Gnal	1.66667	3.16667	1	RIM and ELKS2β
Gnaq	1.5	3.5	1	RIM and ELKS2β
Gng7	2.25	3.25	0.75	RIM and ELKS2β
Gpd1	2	1.5	1	RIM and ELKS2β
Gpd2	1.58333	2.27778	1.19444	RIM and ELKS2β
Gphn	2.3	2.1	0.7	RIM and ELKS2β
Gspt2	2	2	1	RIM and ELKS2β
Gstm1	3.17273	1.66364	0.681818	RIM and ELKS2β
Gstm5	6.2	1.5	0.8	RIM and ELKS2β
Gucy1b3	2	1.5	1	RIM and ELKS2β
Hba	2.04464	2.97321	1.05357	RIM and ELKS2β
Hibadh	1.5	1.75	0.75	RIM and ELKS2β
Hist1h2ad	2.875	3.375	0.958333	RIM and ELKS2β
Hk1	2.16667	2	0.666667	RIM and ELKS2β
Hnrnpk	1.66667	3	0.666667	RIM and ELKS2β
Hnrnpm	2.5	1.5	1	RIM and ELKS2β
Hp	2	3	1	RIM and ELKS2β
Hprt1	2	3.5	1	RIM and ELKS2β
Hsp90b1	1.75	2.125	0.625	RIM and ELKS2β
Hspa5	1.96667	2.15	0.933333	RIM and ELKS2β
Hyou1	2	2.5	1	RIM and ELKS2β
Idh1	1.5	1.5	1	RIM and ELKS2β
Kcnab2	1.75	2.25	1	RIM and ELKS2β
L1cam	3.5	3.5	1.25	RIM and ELKS2β
Lgalsl	1.5	3.5	1	RIM and ELKS2β
Lmna	3	4	1	RIM and ELKS2β
Lmnb2	4	2.5	1	RIM and ELKS2β
Lta4h	3	3.5	0.75	RIM and ELKS2β
Mapre3	7	5	1	RIM and ELKS2β
Mbp	1.88211	2.70316	1.04105	RIM and ELKS2β
Mtch2	1.7	4.4	1.2	RIM and ELKS2β
Napa	4.5	6.66667	1	RIM and ELKS2β
Napg	3.125	2.625	0.625	RIM and ELKS2β
Ndrg1	1.5	2	1	RIM and ELKS2β
Ndrg2	2.38889	2.77778	1.33333	RIM and ELKS2β
Ndufa2	4	1.5	1	RIM and ELKS2β
Ndufb4	3	2	1	RIM and ELKS2β
Nefh	2.875	2.375	1.25	RIM and ELKS2β
Nefl	1.56119	2.06294	0.643357	RIM and ELKS2β
Nefm	3.11111	3.02778	0.902778	RIM and ELKS2β
Nipsnap2	2.5	4	1	RIM and ELKS2β
Nono	1.5	3.5	0.75	RIM and ELKS2β
Npm1	1.5	3	1	RIM and ELKS2β
Nsfl1c	3	3.5	1	RIM and ELKS2β
Ogdhl	2.08333	1.75	1.16667	RIM and ELKS2β
Ogt	3	1.5	1	RIM and ELKS2β
Pabpc1	1.5	2	1	RIM and ELKS2β
Pacsin1	2.5375	1.875	0.5125	RIM and ELKS2β
Pak1	2	3.5	1	RIM and ELKS2β
Park7	2.6	2.075	0.6	RIM and ELKS2β
Pcdh1	1.5	6.5	1	RIM and ELKS2β
Pclo	1.66667	1.6	1.3	RIM and ELKS2β
Pcp4	1.5	15	1	RIM and ELKS2β
Pde10a	3.83333	1.95833	1.04167	RIM and ELKS2β
Pdia3	3	5	1	RIM and ELKS2β
Pdxp	2.5	2.5	1	RIM and ELKS2β
Pfn1	1.92063	1.5	1.48413	RIM and ELKS2β
Pgd	3.625	2.125	0.625	RIM and ELKS2β
Pgk1	2.67857	2.28095	1.30476	RIM and ELKS2β
Pgm1	4.5	2.33333	0.916667	RIM and ELKS2β
Phb2	3	5	1	RIM and ELKS2β
Phgdh	2.08333	1.75	0.833333	RIM and ELKS2β
Pip5k1c	1.5	2	1	RIM and ELKS2β
Pitpna	2.3	4	0.7	RIM and ELKS2β
Plcl2	1.5	1.5	1	RIM and ELKS2β
Ppia	1.60217	1.98916	1.00774	RIM and ELKS2β
Ppib	2	2.5	1	RIM and ELKS2β
Ppp1r9a	2.5	2.5	1	RIM and ELKS2β
Ppp2ca	2.71429	1.71429	1.28571	RIM and ELKS2β
Ppp3ca	1.75	2.475	1	RIM and ELKS2β
Ppp3cb	1.8	3.6	1.4	RIM and ELKS2β
Prkar2a	2	2.5	1	RIM and ELKS2β
Prkca	2.8125	3.1875	0.6875	RIM and ELKS2β
Prrt2	2.1	2	1	RIM and ELKS2β
Psma1	2.5	2	1	RIM and ELKS2β
Psma3	1.5	2	1	RIM and ELKS2β
Psma4	1.75	1.75	0.75	RIM and ELKS2β
Psma7	2.33333	2	0.666667	RIM and ELKS2β
Psmb1	2.5	5	1	RIM and ELKS2β
Pura	2.28846	2.05769	1.25962	RIM and ELKS2β
Purb	2	1.5	0.5	RIM and ELKS2β
Rab11b	4	5.5	1	RIM and ELKS2β
Rab2a	5.17857	3.10714	1.28571	RIM and ELKS2β
Rab2b	1.63333	1.7	1.06667	RIM and ELKS2β
Rab6a	2	2	1	RIM and ELKS2β
Rab6b	3	2	0.75	RIM and ELKS2β
Rab7a	2.36364	2.70455	1	RIM and ELKS2β
Rap1gap	5	4	1	RIM and ELKS2β
Rasal1	1.5	1.5	1	RIM and ELKS2β
Rheb	4.5	1.5	1	RIM and ELKS2β
Rida	3.5	10	1	RIM and ELKS2β
Rps8	1.7	2.2	0.7	RIM and ELKS2β
Rtn1	1.86957	1.61473	1.14251	RIM and ELKS2β
Rufy3	1.5	2.5	1	RIM and ELKS2β
Sccpdh	2	1.5	1	RIM and ELKS2β
Sec22b	2.08333	2.58333	1.16667	RIM and ELKS2β
Sec23a	2.5	1.5	1	RIM and ELKS2β
Sept5	1.8	1.61818	1.06364	RIM and ELKS2β
Sept6	2.93333	1.63889	0.883333	RIM and ELKS2β
Serpina3k	3	2.25	1.25	RIM and ELKS2β
Sfxn5	1.69167	1.78333	1.4	RIM and ELKS2β
Shank3	2.5	2.5	1	RIM and ELKS2β
Sirt2	2.5	3.57692	0.923077	RIM and ELKS2β
Slc25a22	1.70455	2.26136	1.23295	RIM and ELKS2β
Slc7a11	1.5	1.5	0.75	RIM and ELKS2β
Smap1	1.5	1.5	1	RIM and ELKS2β
Sncg	3	2.5	1	RIM and ELKS2β
Sptbn2	1.98077	1.80769	0.596154	RIM and ELKS2β
Src	1.66667	4.33333	1.33333	RIM and ELKS2β
Srr	2.5	3	1	RIM and ELKS2β
Srsf5	1.5	1.5	1	RIM and ELKS2β
Stip1	4.25	4.875	0.875	RIM and ELKS2β
Stx1a	3.75	4.41667	1.16667	RIM and ELKS2β
Suclg2	2	1.5	1	RIM and ELKS2β
Sugt1	2.5	2	1	RIM and ELKS2β
Syn1	2.34077	1.64402	0.877282	RIM and ELKS2β
Syt1	2.23775	1.92034	0.987745	RIM and ELKS2β
Tecpr1	1.5	1.75	1.25	RIM and ELKS2β
Thy1	2.75	1.875	0.875	RIM and ELKS2β
Tomm70	3.75	1.58333	0.583333	RIM and ELKS2β
Tpm2	2	2.5	1	RIM and ELKS2β
Tpp2	2.7	1.5	1	RIM and ELKS2β
Trappc4	4	1.5	1	RIM and ELKS2β
Trim28	1.5	1.5	1	RIM and ELKS2β
Tufm	2.70833	2.13889	1.43056	RIM and ELKS2β
Twf1	1.5	4.125	0.875	RIM and ELKS2β
Txn	1.5	11	1	RIM and ELKS2β
Txnrd1	1.5	1.5	1	RIM and ELKS2β
Uba5	2	2.5	1	RIM and ELKS2β
Ube2m	1.5	2	1	RIM and ELKS2β
Ube2n	5	4.5	1	RIM and ELKS2β
Vamp1	2	2	1	RIM and ELKS2β
Vamp2	1.83333	2.25	0.833333	RIM and ELKS2β
Vapa	1.5	1.5	0.9	RIM and ELKS2β
Vat1l	3	3.75	0.75	RIM and ELKS2β
Vcp	1.83333	2.16667	0.651515	RIM and ELKS2β
Vim	2.5	2	1	RIM and ELKS2β
Ywhae	2.01748	2.41259	1.03846	RIM and ELKS2β
Acsl1	1	2	2	ELKS2β and CaVβ4
Acsl3	1	1.5	1.5	ELKS2β and CaVβ4
Actr1a	1.25	3.5	1.5	ELKS2β and CaVβ4
Adam23	1	2.4	1.6	ELKS2β and CaVβ4
Ahsa1	1	1.625	1.625	ELKS2β and CaVβ4
Ap1s1	1	7	3	ELKS2β and CaVβ4
Appl1	1	2	2	ELKS2β and CaVβ4
Arhgdia	1.32051	2.24359	1.52137	ELKS2β and CaVβ4
Atp6v0a1	1.125	2.625	2.125	ELKS2β and CaVβ4
Atp6v1g2	1	4	2	ELKS2β and CaVβ4
Cct6b	1	2	2	ELKS2β and CaVβ4
Clic4	1	2.5	1.5	ELKS2β and CaVβ4
Cox5b	1	5.5	1.5	ELKS2β and CaVβ4
Cst3	1	2	1.5	ELKS2β and CaVβ4
Cttn	0.958333	1.75	1.625	ELKS2β and CaVβ4
Cul3	1	2.5	1.5	ELKS2β and CaVβ4
Dmtn	1.13889	1.58333	1.58333	ELKS2β and CaVβ4
Elavl3	0.75	2.25	1.5	ELKS2β and CaVβ4
Fam49a	1.4	1.5	3.6	ELKS2β and CaVβ4
Hbbt1	1	3	2	ELKS2β and CaVβ4
Hnrnpa1	1	3	1.5	ELKS2β and CaVβ4
Hnrnpc	1	2	1.5	ELKS2β and CaVβ4
Hsdl1	1	1.5	2	ELKS2β and CaVβ4
Kbtbd11	1.08333	2.33333	2.75	ELKS2β and CaVβ4
Kif21a	0.954545	2.31818	2.72727	ELKS2β and CaVβ4
Kif21b	1	2	1.5	ELKS2β and CaVβ4
Larp1	1	2.5	2.5	ELKS2β and CaVβ4
Lypla2	1	2.25	3.75	ELKS2β and CaVβ4
Mtco2	1	3	2	ELKS2β and CaVβ4
Nnt	1.07143	1.85714	1.71429	ELKS2β and CaVβ4
Pgm3	1	1.5	2	ELKS2β and CaVβ4
Pgrmc1	1	2	1.5	ELKS2β and CaVβ4
Plec	1.25	2.25	2.5	ELKS2β and CaVβ4
Plg	1	2	2	ELKS2β and CaVβ4
Psmb6	1.375	3.25	2.5	ELKS2β and CaVβ4
Rab14	1.17857	1.80952	1.57143	ELKS2β and CaVβ4
Rhog	1.40909	7.90909	2.90909	ELKS2β and CaVβ4
Rpl17	1	2	2	ELKS2β and CaVβ4
Rpn2	1.45455	1.86364	2.68182	ELKS2β and CaVβ4
Rps9	1.25	2.75	1.75	ELKS2β and CaVβ4
Scrn1	1	2.5	2.5	ELKS2β and CaVβ4
Serbp1	1	3.5	2.5	ELKS2β and CaVβ4
Slc16a1	1	3.5	5	ELKS2β and CaVβ4
Slc25a18	1	1.5	1.5	ELKS2β and CaVβ4
Slc6a11	1.05	1.61667	1.51667	ELKS2β and CaVβ4
Slc6a9	1	3	1.5	ELKS2β and CaVβ4
Tiam2	1	1.5	1.5	ELKS2β and CaVβ4
Tubb2a	1	4	1.9	ELKS2β and CaVβ4
Vdac2	1.25	3.41667	1.5	ELKS2β and CaVβ4
Vps26a	0.9	2.3	2.7	ELKS2β and CaVβ4
Abhd16a	3	1	1.5	RIM and Cavβ4
Acta2	2.25	1.25	1.58333	RIM and Cavβ4
Cfl1	2.4375	1.31731	2.08173	RIM and Cavβ4
Cmas	3	1	1.5	RIM and Cavβ4
Fkbp2	2.5	1.25	1.75	RIM and Cavβ4
Gabra1	1.75	1.25	1.5	RIM and Cavβ4
Gjc3	1.5	1	1.5	RIM and Cavβ4
Gnat3	1.5	1.25	1.5	RIM and Cavβ4
Gnl1	2.5	1	1.5	RIM and Cavβ4
Grin1	1.5	1	1.5	RIM and Cavβ4
Gucy1a2	1.5	1	2	RIM and Cavβ4
Isoc1	1.75	1	2.75	RIM and Cavβ4
Kcna2	1.5	1	1.5	RIM and Cavβ4
Lgi3	1.5	1	1.5	RIM and Cavβ4
Madd	4	1	2	RIM and Cavβ4
Mapk3	2	1	1.5	RIM and Cavβ4
Masp1	2.625	1.25	1.5	RIM and Cavβ4
Ppm1e	1.5	1.25	3	RIM and Cavβ4
Prdx4	3.16667	1.33333	2.33333	RIM and Cavβ4
Prdx5	1.5875	1.4125	1.5375	RIM and Cavβ4
Prep	2.28571	0.571429	1.85714	RIM and Cavβ4
Pycr1	1.5	1	1.5	RIM and Cavβ4
Rab8b	3.25	0.75	2.25	RIM and Cavβ4
Rhoc	5.41667	1.16667	1.58333	RIM and Cavβ4
Sacm1l	2	1	2	RIM and Cavβ4
Slc1a4	2.16667	1.16667	1.66667	RIM and Cavβ4
Slc24a2	4	1	3	RIM and Cavβ4
Slc6a17	2.3125	1	1.6875	RIM and Cavβ4
Aamdc	2.5	0.833333	1	RIM only
Abat	1.59286	1.16905	1.02857	RIM only
Acaa1a	1.5	1	1	RIM only
Acad9	2	1	1	RIM only
Acsl6	2.40909	1.40909	1.22727	RIM only
Acss1	1.5	1	1	RIM only
Actn3	5.5	1	1	RIM only
Add1	1.66998	1.06452	0.727047	RIM only
Adgrl1	2.5	1	1	RIM only
Adssl1	2	1	1	RIM only
Agap3	2	1	1	RIM only
Akr1a1	1.58333	0.416667	0.416667	RIM only
Anln	2	1	1	RIM only
Apex1	1.875	1	0.875	RIM only
Aqp4	3.9	0.9	1	RIM only
Arl3	1.5	1	1	RIM only
Arl8a	1.5	1	1	RIM only
Armc1	2.5	1	1	RIM only
Atp2a1	1.5	1	1	RIM only
Atp2a3	1.5	1	1	RIM only
atp5f1a	5	1	1	RIM only
Atp5h	1.7619	1.02381	1.30952	RIM only
Atp6v1g1	1.5	1	1	RIM only
Atp6v1h	2.06044	1.17033	0.826923	RIM only
Atxn10	1.5	1	1	RIM only
Banf1	2.5	1	1	RIM only
Bcap29	1.5	1	1	RIM only
Blvra	2	1	1	RIM only
Bpnt1	1.5	0.75	0.75	RIM only
Bri3bp	1.5	1	1	RIM only
C5	1.5	0.943182	1.36364	RIM only
Cacybp	1.5	1	1	RIM only
Camsap3	1.5	1	1	RIM only
Caskin1	1.5	1	1	RIM only
Cat	1.5	1	1	RIM only
Cct8	1.72222	1	0.666667	RIM only
Chchd3	1.5	1	1	RIM only
Chl1	2	1	1	RIM only
Cldn11	1.67143	1.47143	1.2	RIM only
Cnrip1	2.79167	0.583333	0.916667	RIM only
Cotl1	2.66667	1.16667	0.666667	RIM only
Cryz	1.5	1	1	RIM only
Cyp46a1	1.75	1	1.25	RIM only
Dad1	2	1	1	RIM only
Ddx1	2.5	1	1	RIM only
Dhx9	2	1	1	RIM only
Dlg1	3	1	1	RIM only
Dnaja1	1.5	1	1	RIM only
Drg2	1.5	1	1	RIM only
Eif2s1	1.5	1	1	RIM only
Eif5a2	1.5	1	1	RIM only
Esd	1.5	0.75	0.25	RIM only
Faim2	1.5	1	1	RIM only
FAM120A	1.5	1	1	RIM only
Fbxo22	1.5	1	1	RIM only
Fxyd6	2.04167	1.29167	0.625	RIM only
Gabrb3	1.75	0.75	0.75	RIM only
Gak	1.625	0.625	1	RIM only
Gars	1.5	1	1	RIM only
Glrx3	1.5	1	1	RIM only
Gnai3	1.75	1	1.25	RIM only
Gng4	1.5	1	1	RIM only
Grm3	1.5	1	0.75	RIM only
Gsk3a	2.25	1.08333	0.666667	RIM only
H2afy	1.5	1	1	RIM only
Hcfc2	1.5	1	1	RIM only
Hcn2	2.5	1	1	RIM only
Hint1	1.5	0.75	0.625	RIM only
Hmgb1	2	1	1	RIM only
Hnrnpa0	1.5	1	1	RIM only
Homer1	1.5	1	1	RIM only
Hpca	2.75	1.25	0.75	RIM only
Hsd17b12	1.5	1	1	RIM only
Hspa12a	1.525	1.45	1.2	RIM only
Hspa2	1.65476	1.31548	0.821429	RIM only
Hspa9	1.925	1.3875	0.925	RIM only
Hsph1	1.90809	0.941176	0.669118	RIM only
Impa1	1.5	0.875	0.946429	RIM only
Ina	2.11722	1.46172	0.825359	RIM only
Itsn1	1.5	1	1	RIM only
Kif1a	1.7	1.1	1.4	RIM only
Kif3b	1.5	1	1	RIM only
Lap3	2.5	1	1	RIM only
Lingo1	3.5	1	1	RIM only
malE	1.6	0.6	0.6	RIM only
Map1b	1.72368	1.46829	1.04656	RIM only
Map2k1	3	0.8125	0.875	RIM only
Mapk1	2.16667	0.5	0.333333	RIM only
Mark1	1.5	1	1	RIM only
Mcu	1.5	1	1	RIM only
Mettl7a2	1.5	1	1	RIM only
Mink1	3.25	0.75	1.25	RIM only
Mog	1.73958	1.07292	1.10417	RIM only
Myh10	1.69444	1.08333	0.597222	RIM only
Myh7b	2.5	1	1	RIM only
Myo1d	2	1	1	RIM only
Myo5b	2	1	1	RIM only
Nars	2.18182	0.772727	0.590909	RIM only
Ndufa7	2.5	1	1	RIM only
Nf1	2	1	1	RIM only
Npepps	2.26667	1.4	0.766667	RIM only
Nrcam	3	1.16667	0.666667	RIM only
P4hb	1.5	1	1	RIM only
Pafah1b2	1.625	0.625	0.625	RIM only
Pip4k2a	1.5	1	1	RIM only
Pitpnm2	1.5	1	1	RIM only
Plcb1	1.66667	1.08333	0.75	RIM only
Prepl	2	0.5	1.25	RIM only
Psip1	1.5	1	1	RIM only
Psmb4	3.5	1	1	RIM only
Psmc1	1.5	1	1	RIM only
Psmc6	1.5	1	1	RIM only
QORL2	1.5	0.75	0.75	RIM only
Rab3gap1	1.5	1	1	RIM only
Rap2c	2	1	1	RIM only
Rnf14	1.5	1	1	RIM only
Rnpep	2.21429	1	1.07143	RIM only
Rpl9	1.5	0.75	0.75	RIM only
Rps14	2	1	0.75	RIM only
Rtn3	1.81333	1.40333	1.37833	RIM only
Sars	1.5	1	1	RIM only
Sec24c	1.5	1	1	RIM only
Serpinb1a	2	1	1	RIM only
Sgip1	1.75	0.75	0.75	RIM only
Shank1	1.5	1	1	RIM only
Slc17a6	1.625	1.125	0.75	RIM only
Slc25a13	1.58333	1.41667	0.75	RIM only
Slc25a46	2	1	1	RIM only
Slc27a4	1.5	1	1	RIM only
Smap2	1.5	1	1	RIM only
Snap91	1.95604	1.06044	0.879121	RIM only
Snrpb	2	1	1	RIM only
Snrpd2	3	1	1	RIM only
Snrpd3	3	1	1	RIM only
Stxbp1	1.59125	1.0362	0.936275	RIM only
Svop	1.5	1	1	RIM only
Syngr3	1.625	1.125	1.25	RIM only
Tecr	1.8	0.85	0.55	RIM only
Tf	1.5	1	1	RIM only
Them4	1.5	1	1	RIM only
Timm23	1.5	1	1	RIM only
Tmem35a	3.375	1.125	1	RIM only
Tpm4	1.5	1	1	RIM only
Tpt1	3	1	1	RIM only
Try10	2.25	1.375	0.75	RIM only
Tuba3a	3	1	1	RIM only
Txnl1	2.91667	0.833333	0.916667	RIM only
Txnrd2	2.5	1	1	RIM only
Uba2	1.66667	0.666667	0.666667	RIM only
Ube2v1	1.83333	1.16667	0.833333	RIM only
Ubr4	1.5	1	1	RIM only
Vps51	1.5	1	1	RIM only
Wars	2	1	1	RIM only
Wdr44	2	1.33333	0.833333	RIM only
Wdr46	1.5	1	1	RIM only
Wipi2	1.5	1	1	RIM only
Xpo7	2	1	1	RIM only
Ywhag	1.62917	1.43542	1.09792	RIM only
Ywhah	2.7125	0.875	0.875	RIM only
Acadl	0.9375	4.4375	0.9375	ELKS2β only
Acat1	1.21905	1.93095	1.20476	ELKS2β only
Acly	1.00385	1.56923	0.869231	ELKS2β only
Actr3	1	4	1	ELKS2β only
Adam11	1	1.5	1	ELKS2β only
Adap1	1	1.5	1	ELKS2β only
Ado	1	1.5	1	ELKS2β only
Adss	0.75	1.5	0.75	ELKS2β only
Agk	1	4	1	ELKS2β only
Ak3	1	4	1	ELKS2β only
Akap7	1	1.5	1	ELKS2β only
Alad	1	1.5	1	ELKS2β only
Aldh6a1	0.75	2.75	0.75	ELKS2β only
Aldoc	1.24921	1.92937	0.802381	ELKS2β only
Anxa5	0.766667	1.7	0.266667	ELKS2β only
Ap1b1	1	2.25	0.75	ELKS2β only
Ap3m2	0.9	2.6	0.7	ELKS2β only
Apmap	1	1.5	1	ELKS2β only
Apoa1	1	3	1	ELKS2β only
Apoe	1	2.5	1	ELKS2β only
Arcn1	1	1.5	1	ELKS2β only
Arhgap1	1	2.5	0.75	ELKS2β only
Arhgap44	1	1.5	1	ELKS2β only
Arpc2	1.16667	1.91667	0.916667	ELKS2β only
Arpc5l	1	4	1	ELKS2β only
Asns	1	2	1	ELKS2β only
Atat1	1	1.5	1	ELKS2β only
Atp1a2	1.31818	1.55227	0.977273	ELKS2β only
Atp1b1	1.00458	1.50114	0.843249	ELKS2β only
Atp6v1f	1	1.5	1	ELKS2β only
Baiap2	1	2	1	ELKS2β only
Bcap31	1	2	1	ELKS2β only
Bcat1	1	1.5	1	ELKS2β only
Bdh1	0.833333	5.58333	0.75	ELKS2β only
Bles03	1	1.5	1	ELKS2β only
Bphl	1	1.5	1	ELKS2β only
Bsg	1	4	1	ELKS2β only
Btf3l4	1	3.5	1	ELKS2β only
C2cd2l	1	3.5	1	ELKS2β only
CA198	1	2	1	ELKS2β only
Cadm1	1	1.5	1	ELKS2β only
Cadm4	1	1.5	1	ELKS2β only
Calr	0.8125	3.5625	0.5625	ELKS2β only
Camk4	1	3.5	1	ELKS2β only
Cap1	0.970833	1.56667	1.225	ELKS2β only
Capza1	1	2.5	1	ELKS2β only
Capza2	1.40278	2.54167	0.861111	ELKS2β only
Capzb	1.4	1.725	0.725	ELKS2β only
Cbr3	1	1.5	1	ELKS2β only
Cct6a	1.41667	2.91667	0.666667	ELKS2β only
Cd82	1	1.5	1	ELKS2β only
Cdc37	1	1.5	1	ELKS2β only
Cdh13	1	2	1	ELKS2β only
Cdk14	1	1.5	1	ELKS2β only
Chmp2a	1	1.5	1	ELKS2β only
Clpp	0.875	2.25	0.625	ELKS2β only
Cltb	1	1.5	1	ELKS2β only
Clvs1	1	1.5	1	ELKS2β only
Clybl	1	1.5	1	ELKS2β only
Coa6	1	1.5	1	ELKS2β only
Col19a1	1	2.5	1	ELKS2β only
Copa	0.75	1.75	1	ELKS2β only
Cops3	0.75	3.25	0.75	ELKS2β only
Cops4	1	4	1	ELKS2β only
Cops5	1	2.25	0.75	ELKS2β only
Cops7a	1	2.5	1	ELKS2β only
Coro1a	0.991667	1.55833	0.675	ELKS2β only
Coro1b	0.916667	1.91667	0.916667	ELKS2β only
Cox4i1	1	4	1	ELKS2β only
Cox7a2l	1	2	1	ELKS2β only
Cplx1	1	2	1	ELKS2β only
Cplx2	1	1.5	1	ELKS2β only
Crk	1	2	1	ELKS2β only
Cspg5	1	2	1	ELKS2β only
Ctbp1	0.833333	3.16667	1	ELKS2β only
Ctnna2	1	2	1	ELKS2β only
Ctnnb1	0.961538	5.96154	0.846154	ELKS2β only
Ctsl	1	2.5	1	ELKS2β only
Dctn1	1	1.8	0.6	ELKS2β only
Dctn2	1	4.5	1	ELKS2β only
Dctn3	1	2	1	ELKS2β only
Dctn5	1	1.5	1	ELKS2β only
Decr1	1	2	1	ELKS2β only
Dlg2	1	2	1	ELKS2β only
Dlg3	1	1.5	1	ELKS2β only
Dlg4	1	2	1	ELKS2β only
Dnajb2	1	1.5	1	ELKS2β only
Dnajc6	0.96875	1.625	0.9375	ELKS2β only
Dst	1	2.5	1	ELKS2β only
Dusp3	1	3.5	1	ELKS2β only
Dynlt1	1	1.5	1	ELKS2β only
Eci2	1	1.5	1	ELKS2β only
Eea1	1	1.5	1	ELKS2β only
Eef1d	1	1.5	1	ELKS2β only
Eef2	0.916667	1.625	1.25	ELKS2β only
Efhd2	1	2.5	1	ELKS2β only
Ehd1	1	1.5	1	ELKS2β only
Eif3i	1	1.5	1	ELKS2β only
Eif4a3	1	1.5	1	ELKS2β only
Eif4h	1	4	1	ELKS2β only
Eloc	1	2	1	ELKS2β only
Emc3	1	2	1	ELKS2β only
Eno1	1.38958	1.60283	0.927159	ELKS2β only
Epha4	1	1.5	1	ELKS2β only
Epn1	1	2	1	ELKS2β only
Eps15l1	1	1.5	1	ELKS2β only
Erc1	1	2	1	ELKS2β only
Exoc4	1	1.5	1	ELKS2β only
Exog	1	2	1	ELKS2β only
Ezr	1	3.5	1	ELKS2β only
Fabp7	1	1.5	1	ELKS2β only
Fah	1	1.5	1	ELKS2β only
Fahd1	1	1.5	1	ELKS2β only
Fahd2	0.625	2.25	0.625	ELKS2β only
Fam171b	1	1.5	1	ELKS2β only
Fam98b	1	2	1	ELKS2β only
Farp1	1.25	2	0.75	ELKS2β only
Fga	1	1.5	1	ELKS2β only
Fgg	1	1.5	1	ELKS2β only
Fkbp4	1	1.5	1	ELKS2β only
Fsd1	1	1.5	1	ELKS2β only
Fth1	1	1.5	1	ELKS2β only
Gad2	1	3.5	1	ELKS2β only
Ganab	1	1.5	1	ELKS2β only
Gas7	1	2	1	ELKS2β only
Gda	1.33571	1.95	0.885714	ELKS2β only
Gdap1	0.875	2.45833	1.20833	ELKS2β only
Gga3	1	1.5	1	ELKS2β only
Gmfg	1	2	1	ELKS2β only
Gnas	1	2	0.75	ELKS2β only
Gnb5	1.07143	2.07143	0.785714	ELKS2β only
Gpm6a	0.875	1.625	1	ELKS2β only
Gpx1	1	1.5	1	ELKS2β only
Gpx4	0.75	1.75	1.25	ELKS2β only
Grhpr	1	2.5	1	ELKS2β only
Gria2	0.854167	1.625	1.16667	ELKS2β only
Gsn	1	1.5	1	ELKS2β only
Gstp1	0.642857	1.7619	0.571429	ELKS2β only
H2afz	1	3	1	ELKS2β only
Hadh	1	1.5	1	ELKS2β only
Hapln1	0.875	2.25	1.25	ELKS2β only
Hebp1	1	3.75	0.75	ELKS2β only
Hist1h2bk	1.2619	1.85714	0.97619	ELKS2β only
Hist1h3a	0.616667	1.56667	0.483333	ELKS2β only
Hmgb3	1	2	1	ELKS2β only
Hnrnpa2b1	1	4	1	ELKS2β only
Hnrnpl	1.3	3.4	0.7	ELKS2β only
Hnrnpll	0.916667	1.58333	0.75	ELKS2β only
Hsbp1	1	1.5	1	ELKS2β only
Hsp90aa1	0.922619	2.03571	0.690476	ELKS2β only
Hspa1b	1.25	2.22222	0.805556	ELKS2β only
Hspa8	1.21255	1.50462	0.85469	ELKS2β only
Hspe1	1	10	1	ELKS2β only
Ilf2	1	2	1	ELKS2β only
Itch	1	1.5	1	ELKS2β only
Itih3	1	3	1	ELKS2β only
Jagn1	1	1.5	1	ELKS2β only
JPT1	1	2	1	ELKS2β only
Kars	1	2	1	ELKS2β only
Khsrp	1	1.5	1	ELKS2β only
Kif5b	1	2.5	1	ELKS2β only
Klhl1	1	2	1	ELKS2β only
Krt24	1	4	1	ELKS2β only
L2hgdh	1	1.5	1	ELKS2β only
Lancl2	1	2	1	ELKS2β only
Ldhc	1.25	1.5	1	ELKS2β only
Lmbrd2	1	1.5	1	ELKS2β only
Lmnb1	1	2	1	ELKS2β only
Lyz1	1	2	1	ELKS2β only
Map4	0.75	2.28571	1.14286	ELKS2β only
Map7d2	1	1.5	1	ELKS2β only
Mat2a	1	1.5	1	ELKS2β only
Matr3	0.666667	1.66667	0.666667	ELKS2β only
Me2	1	1.5	1	ELKS2β only
Me3	0.666667	3.66667	0.666667	ELKS2β only
Mff	1	1.5	1	ELKS2β only
Mfsd6	1	1.5	1	ELKS2β only
Mob4	1	1.5	1	ELKS2β only
Mp68	0.485714	1.6	0.971429	ELKS2β only
Mtatp8	1.16667	1.91667	0.916667	ELKS2β only
Mthfd1	1.33333	1.83333	0.666667	ELKS2β only
Myo18a	1	1.5	1	ELKS2β only
Nadk2	1	1.5	1	ELKS2β only
Nap1l4	1	2	1	ELKS2β only
Naxd	1	2.5	1	ELKS2β only
Ncald	1	2.5	1	ELKS2β only
Ncan	1	3	1	ELKS2β only
Ndrg3	1	2	1	ELKS2β only
Ndufa9	1	1.5	1	ELKS2β only
Ndufb11	1	2.5	1	ELKS2β only
Ndufs3	1	3	1	ELKS2β only
Nebl	1	5.5	1	ELKS2β only
Necab1	1	1.5	1	ELKS2β only
Nfs1	1	1.5	1	ELKS2β only
Nipsnap1	1	1.5	1	ELKS2β only
Nipsnap3b	1	1.5	1	ELKS2β only
Nme2	1	1.5	1	ELKS2β only
Nomo1	1	1.5	1	ELKS2β only
Nt5c	1	1.5	1	ELKS2β only
Ntm	0.666667	3	1.33333	ELKS2β only
Nudc	1	2.5	1	ELKS2β only
Nudcd3	1	1.5	1	ELKS2β only
Ola1	1	2.5	1	ELKS2β only
Opalin	1	1.5	1	ELKS2β only
Osbp	0.785714	1.78571	0.714286	ELKS2β only
Osbp2	1	1.5	1	ELKS2β only
Oscp1	1	2.5	1	ELKS2β only
Paics	1	1.5	1	ELKS2β only
Pak2	1	2.5	1	ELKS2β only
Palm2	1	1.5	1	ELKS2β only
Pcdh9	1	1.5	1	ELKS2β only
Pcp4l1	1	3	1	ELKS2β only
Pcsk1n	1	5	1	ELKS2β only
Pcx	0.833333	1.66667	0.666667	ELKS2β only
Pde1a	1.125	3	1	ELKS2β only
Pdia6	1	1.5	1	ELKS2β only
Pdk3	1	2.5	1	ELKS2β only
Pdpk1	1	2.5	1	ELKS2β only
Pex5l	1	1.5	1	ELKS2β only
Pfdn2	1	1.5	1	ELKS2β only
Pfkl	0.892857	1.57143	1.01786	ELKS2β only
Pfn2	0.785714	2.28571	1.35714	ELKS2β only
Pgp	1	1.5	1	ELKS2β only
Phactr1	1	1.5	1	ELKS2β only
Phf24	0.666667	2.33333	0.666667	ELKS2β only
Pi4ka	1	2.35714	0.571429	ELKS2β only
Pklr	1.375	1.875	0.75	ELKS2β only
Plaa	1	3.5	1	ELKS2β only
Plxna1	1	1.5	0.833333	ELKS2β only
Ppa1	1	8	1	ELKS2β only
Ppfia3	1	1.5	1	ELKS2β only
Ppme1	1.41667	1.83333	0.666667	ELKS2β only
Ppp1cc	1	1.5	1	ELKS2β only
Ppp1r7	1	3	1	ELKS2β only
Ppp1r9b	1	2	1	ELKS2β only
Ppp2r2c	0.833333	2.16667	0.666667	ELKS2β only
Prdx1	1.4513	1.76299	1.10065	ELKS2β only
Prnp	1	1.5	1	ELKS2β only
Psma2	1	2.5	1	ELKS2β only
Psma5	1.25	2.75	0.75	ELKS2β only
Psmc3	1	2	1	ELKS2β only
Psmc5	1	2	1	ELKS2β only
Psmd4	1	2.5	1	ELKS2β only
Ptgds	1	1.5	1	ELKS2β only
Ptpn11	1	1.5	1	ELKS2β only
Ptrf	1	1.5	1	ELKS2β only
Pzp	1	3	1	ELKS2β only
Qdpr	1.46032	1.53175	0.563492	ELKS2β only
Rab10	1.36223	1.5031	0.839009	ELKS2β only
Rab21	0.75	1.75	0.75	ELKS2β only
Rab24	1	1.5	1	ELKS2β only
Rab4b	1	2	1	ELKS2β only
Rab5b	1.47115	1.89423	0.471154	ELKS2β only
Rab9b	1	1.5	1	ELKS2β only
Rabgap1	1	1.5	1	ELKS2β only
Rack1	0.916667	1.75	0.416667	ELKS2β only
Rap1gds1	1.25	2.75	0.75	ELKS2β only
Rap2a	1	2	1	ELKS2β only
Rasl2-9	0.916667	1.5	0.666667	ELKS2β only
Rdx	1	1.5	1	ELKS2β only
Reep2	1	1.5	1	ELKS2β only
Retreg2	1	1.5	1	ELKS2β only
Rgs6	1	1.5	1	ELKS2β only
Rgs7bp	1	1.5	1	ELKS2β only
Rmdn3	1	1.5	1	ELKS2β only
Rpl11	1	2	1	ELKS2β only
Rpl27	1	1.5	1	ELKS2β only
Rpl28	1	2.5	1	ELKS2β only
Rpl3	0.75	1.75	0.75	ELKS2β only
Rpl4	1	1.5	1	ELKS2β only
Rplp0	1	1.5	1	ELKS2β only
Rps15a	1	2	1	ELKS2β only
Rps27a	1.48333	1.58333	1.25	ELKS2β only
Rps4x	1	2	1	ELKS2β only
Rps6	1.125	1.5	1.25	ELKS2β only
Rpsa	1	2	1	ELKS2β only
Scg2	1	2	1	ELKS2β only
Scn2b	1	1.5	1	ELKS2β only
Sdr39u1	1	2	1	ELKS2β only
Sept4	1	3.5	1	ELKS2β only
Sept8	1.30303	1.61364	0.659091	ELKS2β only
Sept9	1	2.5	1	ELKS2β only
Serpina1b	1	2.5	1	ELKS2β only
Setd7	1	1.5	1	ELKS2β only
Sfpq	0.666667	2.16667	0.666667	ELKS2β only
Sgta	1	1.5	1	ELKS2β only
Sh3bgrl	1	2	1	ELKS2β only
Sh3glb2	1	1.5	1	ELKS2β only
Skp1	1.25	3.25	1.25	ELKS2β only
Slc25a1	1.25	2.25	0.5	ELKS2β only
Slc2a1	0.5	1.625	0.625	ELKS2β only
Slc9a3r1	1	3	1	ELKS2β only
Smndc1	1	1.5	1	ELKS2β only
Snap25	1.24	2.045	1.085	ELKS2β only
Snrpf	1	1.5	1	ELKS2β only
Snx2	1	2	1	ELKS2β only
Snx27	1.25	1.5	0.75	ELKS2β only
Soga3	1	2	1	ELKS2β only
Spr	1	3	1	ELKS2β only
Ssbp1	1	2	1	ELKS2β only
St13	1	1.5	1	ELKS2β only
Stmn1	1	4	1	ELKS2β only
Strn	1	2	1	ELKS2β only
Stum	1	1.5	0.75	ELKS2β only
Sult4a1	1	2	1	ELKS2β only
Sv2b	0.70098	1.61275	0.808824	ELKS2β only
Svip	1	2.5	1	ELKS2β only
Syn3	1.25	2	1.25	ELKS2β only
Synj2bp	1	1.5	1	ELKS2β only
Synpo	1.42857	5.64286	0.714286	ELKS2β only
Syp	1.01667	1.54444	0.944444	ELKS2β only
Syt2	1	1.66667	0.666667	ELKS2β only
Tagln2	1	2	1	ELKS2β only
Tagln3	1.125	4.625	0.75	ELKS2β only
Tceal5	1	3	1	ELKS2β only
Tkt	1.36753	1.56883	0.715584	ELKS2β only
Tln2	1	3	1	ELKS2β only
Tmem256	1	1.5	1	ELKS2β only
Tmem30a	1	2	1	ELKS2β only
Tmod2	1	4.5	1	ELKS2β only
Tmtc2	1	1.5	1	ELKS2β only
Tmx2	1	1.5	1.25	ELKS2β only
Tmx4	1	2	1	ELKS2β only
Tollip	1.33333	1.66667	0.666667	ELKS2β only
Tomm22	0.8	2.25	0.65	ELKS2β only
Tpd52	1	1.5	1	ELKS2β only
Tpd52l2	1	2	1	ELKS2β only
Tpm1	1	3	1	ELKS2β only
Tpm3	1	4.5	1	ELKS2β only
Tpr	1	2	1	ELKS2β only
Tprg1l	0.875	2.125	0.625	ELKS2β only
Trim61	1	2	1	ELKS2β only
Tsr2	1	1.5	1	ELKS2β only
Tst	1	1.5	1	ELKS2β only
Twf2	1.2	2.4	0.6	ELKS2β only
Ube2k	1	1.5	1	ELKS2β only
Ube2o	1.33333	1.5	1	ELKS2β only
Ube2v2	1	4	1	ELKS2β only
Ubqln2	1	1.5	1	ELKS2β only
Ubqln4	1	2.5	1	ELKS2β only
Uchl1	1.11538	2.54396	0.89011	ELKS2β only
Uchl3	1	3	1	ELKS2β only
Ugp2	0.75	1.75	0.75	ELKS2β only
Usp14	1.16667	6	1	ELKS2β only
Usp9x	1.16667	1.5	1.33333	ELKS2β only
Vapb	1	4.5	1	ELKS2β only
Vps35	0.833333	2	0.833333	ELKS2β only
Wasf1	1.25	1.75	0.75	ELKS2β only
Wee2	1	2	1	ELKS2β only
Wipf3	0.75	2.5	0.75	ELKS2β only
Wnk2	1	1.5	1	ELKS2β only
Xpnpep1	0.75	1.5	0.75	ELKS2β only
Yars	1	1.5	1	ELKS2β only
A2m	1	1	1.5	Cavβ4 only
Add3	1.33333	0.766667	3.73333	Cavβ4 only
Adh5	1	1	1.5	Cavβ4 only
Akap12	1	1	1.5	Cavβ4 only
Aurkaip1	1	1	1.5	Cavβ4 only
Blmh	1	1	1.5	Cavβ4 only
Bub3	1	1	1.5	Cavβ4 only
C1qb	1	1	2.5	Cavβ4 only
C1ra	1	1	1.5	Cavβ4 only
Cacna1a	1	1	2.5	Cavβ4 only
Cacna1b	1	1	6	Cavβ4 only
Cacna1e	1	1	4	Cavβ4 only
Cacnb1	1	1	12.5	Cavβ4 only
Camk2d	0.833333	0.666667	1.66667	Cavβ4 only
Cbarp	1	1	6	Cavβ4 only
Chordc1	1	1	1.5	Cavβ4 only
Cntnap1	1.375	1.15	1.7	Cavβ4 only
Cul7	1	1	1.5	Cavβ4 only
Cyb5b	1.2	0.8	2.4	Cavβ4 only
Cyct	0.6	0.6	2.6	Cavβ4 only
Dync1i2	1.25	1	2.33333	Cavβ4 only
Eif3b	1	1	1.5	Cavβ4 only
Fhl1	1	1.25	1.5	Cavβ4 only
Fis1	1	1.25	1.75	Cavβ4 only
Fscn1	0.829167	1.21667	1.53333	Cavβ4 only
Fundc2	1	1	2	Cavβ4 only
Gabrb1	1	1	1.5	Cavβ4 only
Gabrb2	1.16667	0.833333	1.5	Cavβ4 only
Gde1	1	1	1.5	Cavβ4 only
Hba-a2	1	1	1.5	Cavβ4 only
Hdac11	1	0.75	2.75	Cavβ4 only
Hsd17b11	1	1	1.5	Cavβ4 only
Kcnj10	1	1	3	Cavβ4 only
Kcnma1	0.75	0.75	2	Cavβ4 only
Lrguk	1	1	2.5	Cavβ4 only
Mapre2	0.833333	1.22222	1.55556	Cavβ4 only
Mlc1	0.75	0.75	3	Cavβ4 only
Mpc1	1	1	2	Cavβ4 only
Myo5a	0.5	1.35714	2.82143	Cavβ4 only
Ndufb6	1	1	1.5	Cavβ4 only
Pacs1	0.875	1.25	1.75	Cavβ4 only
Pdap1	1	1	1.5	Cavβ4 only
Pdxk	0.861111	1	2	Cavβ4 only
Pllp	0.916667	1.08333	2	Cavβ4 only
Prkce	0.944444	0.833333	1.77778	Cavβ4 only
Rab3c	0.837607	0.965812	1.51496	Cavβ4 only
Rabl6	1	1	1.5	Cavβ4 only
Rims2	1	1	1.5	Cavβ4 only
Rpl27a	1	1	1.5	Cavβ4 only
Rpl5	1	1	5	Cavβ4 only
Rps7	1	1	2	Cavβ4 only
Rrp1b	1	1	1.5	Cavβ4 only
Sar1a	1	1	1.5	Cavβ4 only
Serpinb6	1	1	1.5	Cavβ4 only
Slc30a3	1.16667	0.666667	1.66667	Cavβ4 only
Slc32a1	1	1.1	1.5	Cavβ4 only
Slc6a7	1.3	1.1	2.1	Cavβ4 only
Slc9a1	0.75	1.25	1.625	Cavβ4 only
Snapc4	1	1	1.5	Cavβ4 only
Timm22	1	1	1.5	Cavβ4 only
Tmem163	0.714286	1.14286	1.78571	Cavβ4 only
Tmem33	1	1	2	Cavβ4 only
Trim2	1	1	1.5	Cavβ4 only
Unc13a	1	1	1.5	Cavβ4 only
Unc13c	1	1	2	Cavβ4 only
Vps16	1	1	1.5	Cavβ4 only
Vps29	0.875	1	4.625	Cavβ4 only
Wwc2	1	1	3	Cavβ4 only
Zkscan8	1	1	1.5	Cavβ4 only

## Sheet: Fig.2S2-SD1 Venn 2.5-fold
Figure 2 - figure supplement 2 - Source Data 1
control (threshold 2.5)
Gene	RIMPPCP (fold change)	ELKS2β (fold change)	CaVβ4 (fold change)	Enrichment Group
Rims1	4.5	3.33333	13.3333	ALL
Erc2	1	32	4	ELKS2β and CaVβ4
Cacnb4	1	1	37.5	CaVβ4 only
Acsbg1	4.375	4.1875	3.625	ALL
Akap5	5.5	13	4.13636	ALL
Atp5f1	5.625	6.5625	2.5625	ALL
Gng2	3	4	2.5	ALL
Hepacam	3.44444	2.5	3	ALL
Hist1h1d	2.5	5	2.5	ALL
Hist1h4a	4.38095	6.5	2.59524	ALL
Hpcal1	3.66667	6.66667	2.66667	ALL
Nckap1	4	3.02381	6.30952	ALL
Nme1	4.83333	5.83333	3.16667	ALL
Psmd1	5	2.5	2.5	ALL
Psmd3	2.58333	2.75	6.875	ALL
Rab1b	4.1	3.7	4.7	ALL
Rab35	3.21429	3.78571	2.85714	ALL
Rab5a	5.375	5.5	2.8125	ALL
Rap1a	3	4.5	2.5	ALL
Slc2a3	4.4	4	4.5	ALL
Slc3a2	6.46429	8.92857	3.53571	ALL
Vsnl1	3.9375	4.625	3	ALL
Actr2	4.14286	6.28571	1.85714	RIM and ELKS2β
Ak1	5	3.25	1.75	RIM and ELKS2β
Amph	2.5	9	1	RIM and ELKS2β
Atp6v1d	2.5	2.5	1	RIM and ELKS2β
Atp6v1e1	4.5	8.5	1	RIM and ELKS2β
Bin1	4.625	4.875	1.875	RIM and ELKS2β
Cadm2	4.25	2.5	1.5	RIM and ELKS2β
Calb1	3	2.5	1	RIM and ELKS2β
Calb2	5.5	5.33333	1.16667	RIM and ELKS2β
Calm2	2.78571	6.85714	2.07143	RIM and ELKS2β
Canx	6.25	7	0.75	RIM and ELKS2β
Cbr1	4.7	4.4	0.7	RIM and ELKS2β
Cmpk1	4.33333	4.16667	1.66667	RIM and ELKS2β
Crip2	4.5	3	2	RIM and ELKS2β
Dnajc5	3	4.5	2	RIM and ELKS2β
Dpp10	3.14286	4	1.28571	RIM and ELKS2β
Dpysl3	4.55556	8.16667	1.27778	RIM and ELKS2β
Dync1li1	2.5	3	1	RIM and ELKS2β
Dynlrb1	2.5	3.5	1	RIM and ELKS2β
Fh	7.25	7.8125	0.625	RIM and ELKS2β
Gfap	4	6	1	RIM and ELKS2β
Gja1	3.05556	5.02778	1.91667	RIM and ELKS2β
Glo1	5.5	4.5	1	RIM and ELKS2β
Hist1h2ad	2.875	3.375	0.958333	RIM and ELKS2β
L1cam	3.5	3.5	1.25	RIM and ELKS2β
Lmna	3	4	1	RIM and ELKS2β
Lmnb2	4	2.5	1	RIM and ELKS2β
Lta4h	3	3.5	0.75	RIM and ELKS2β
Mapre3	7	5	1	RIM and ELKS2β
Naca	4.5	2.5	2	RIM and ELKS2β
Napa	4.5	6.66667	1	RIM and ELKS2β
Napb	6.63636	9.31818	2.04545	RIM and ELKS2β
Napg	3.125	2.625	0.625	RIM and ELKS2β
Nefm	3.11111	3.02778	0.902778	RIM and ELKS2β
Nptn	13.9	8.7	2.1	RIM and ELKS2β
Nsfl1c	3	3.5	1	RIM and ELKS2β
Palm	2.78333	4.01667	2.41667	RIM and ELKS2β
Pcbp3	4	2.5	1.5	RIM and ELKS2β
Pdia3	3	5	1	RIM and ELKS2β
Pdxp	2.5	2.5	1	RIM and ELKS2β
Ppp1r9a	2.5	2.5	1	RIM and ELKS2β
Prkca	2.8125	3.1875	0.6875	RIM and ELKS2β
Psmb1	2.5	5	1	RIM and ELKS2β
Psmb3	2.5	2.5	1.5	RIM and ELKS2β
Psmd12	2.5	3	1.5	RIM and ELKS2β
Rab11b	4	5.5	1	RIM and ELKS2β
Rab2a	5.17857	3.10714	1.28571	RIM and ELKS2β
Rala	2.5	2.5	1.5	RIM and ELKS2β
Rap1gap	5	4	1	RIM and ELKS2β
Rpl7a	3	3	1.5	RIM and ELKS2β
Rps2	2.5	2.5	2	RIM and ELKS2β
Sept3	2.5	4.75	1.9375	RIM and ELKS2β
Sh3gl1	2.5	2.5	2	RIM and ELKS2β
Shank3	2.5	2.5	1	RIM and ELKS2β
Sirt2	2.5	3.57692	0.923077	RIM and ELKS2β
Snca	2.875	7.625	2	RIM and ELKS2β
Sncb	7	3.25	1.75	RIM and ELKS2β
Sncg	3	2.5	1	RIM and ELKS2β
Srr	2.5	3	1	RIM and ELKS2β
Stip1	4.25	4.875	0.875	RIM and ELKS2β
Stx1a	3.75	4.41667	1.16667	RIM and ELKS2β
Stx1b	2.825	4.1	1.875	RIM and ELKS2β
Ube2n	5	4.5	1	RIM and ELKS2β
Vat1l	3	3.75	0.75	RIM and ELKS2β
Ap1s1	1	7	3	ELKS2β and CaVβ4
Gng3	1.5	2.5	2.5	ELKS2β and CaVβ4
Iqsec1	2	2.875	3.75	ELKS2β and CaVβ4
Itpa	2	3.5	2.5	ELKS2β and CaVβ4
Larp1	1	2.5	2.5	ELKS2β and CaVβ4
Mpi	2	5	3.5	ELKS2β and CaVβ4
Psmb6	1.375	3.25	2.5	ELKS2β and CaVβ4
Rhog	1.40909	7.90909	2.90909	ELKS2β and CaVβ4
Scrn1	1	2.5	2.5	ELKS2β and CaVβ4
Serbp1	1	3.5	2.5	ELKS2β and CaVβ4
Slc16a1	1	3.5	5	ELKS2β and CaVβ4
Usp5	1.85	3.175	3.25	ELKS2β and CaVβ4
Bsn	2.58333	1.69444	3.30556	RIM and Cavβ4
Gabbr2	3.75	2.25	4.75	RIM and Cavβ4
Prrt3	4.5	2	3.5	RIM and Cavβ4
Slc12a2	2.75	1.75	2.75	RIM and Cavβ4
Slc24a2	4	1	3	RIM and Cavβ4
Sv2a	2.51515	2.15909	2.92424	RIM and Cavβ4
A0A097PUD0	2.5	1.5	2	RIM only
Aamdc	2.5	0.833333	1	RIM only
Abhd16a	3	1	1.5	RIM only
Actn3	5.5	1	1	RIM only
Actn4	4.5	1.5	1	RIM only
Adgrl1	2.5	1	1	RIM only
Alcam	3.91667	2.25	1.91667	RIM only
Ap1g1	3.5	2	2	RIM only
Ap3s1	3	2	1	RIM only
Aqp4	3.9	0.9	1	RIM only
Armc1	2.5	1	1	RIM only
atp5f1a	5	1	1	RIM only
Atp6v1c1	2.5	1.75	1.75	RIM only
Banf1	2.5	1	1	RIM only
Camk2a	2.78966	1.93621	2.13621	RIM only
Cct2	4.5	2	1	RIM only
Cct3	2.5	1.5	0.75	RIM only
Cmas	3	1	1.5	RIM only
Cnrip1	2.79167	0.583333	0.916667	RIM only
Cotl1	2.66667	1.16667	0.666667	RIM only
Ddx1	2.5	1	1	RIM only
Dlg1	3	1	1	RIM only
Dync1li2	3.16667	1.5	0.666667	RIM only
Eif4a1	2.75	2	1.25	RIM only
Fabp3	3.5	2	1	RIM only
Fkbp2	2.5	1.25	1.75	RIM only
Gdap1l1	2.91667	1.83333	0.833333	RIM only
Gdpd1	3	1.5	1.5	RIM only
Gna11	2.5	1.5	1	RIM only
Gnl1	2.5	1	1.5	RIM only
Gstm1	3.17273	1.66364	0.681818	RIM only
Gstm5	6.2	1.5	0.8	RIM only
Hcn2	2.5	1	1	RIM only
Hnrnpm	2.5	1.5	1	RIM only
Hpca	2.75	1.25	0.75	RIM only
Itpr1	4.5	2	1.5	RIM only
Lingo1	3.5	1	1	RIM only
Madd	4	1	2	RIM only
Map2k1	3	0.8125	0.875	RIM only
Masp1	2.625	1.25	1.5	RIM only
Mink1	3.25	0.75	1.25	RIM only
Myh7b	2.5	1	1	RIM only
Nefh	2.875	2.375	1.25	RIM only
Nrcam	3	1.16667	0.666667	RIM only
Ogt	3	1.5	1	RIM only
Pacsin1	2.5375	1.875	0.5125	RIM only
Pde10a	3.83333	1.95833	1.04167	RIM only
Pgd	3.625	2.125	0.625	RIM only
Pgk1	2.67857	2.28095	1.30476	RIM only
Pgm1	4.5	2.33333	0.916667	RIM only
Ppp2ca	2.71429	1.71429	1.28571	RIM only
Psma1	2.5	2	1	RIM only
Psmb4	3.5	1	1	RIM only
Rab6b	3	2	0.75	RIM only
Rab8b	3.25	0.75	2.25	RIM only
Rheb	4.5	1.5	1	RIM only
Rhoc	5.41667	1.16667	1.58333	RIM only
Sec23a	2.5	1.5	1	RIM only
Sept6	2.93333	1.63889	0.883333	RIM only
Serpina3k	3	2.25	1.25	RIM only
Snrpd2	3	1	1	RIM only
Snrpd3	3	1	1	RIM only
Srcin1	2.5	1.5	2.25	RIM only
Sugt1	2.5	2	1	RIM only
Thy1	2.75	1.875	0.875	RIM only
Tmem35a	3.375	1.125	1	RIM only
Tomm70	3.75	1.58333	0.583333	RIM only
Tpp2	2.7	1.5	1	RIM only
Tpt1	3	1	1	RIM only
Trappc4	4	1.5	1	RIM only
Tuba3a	3	1	1	RIM only
Txnl1	2.91667	0.833333	0.916667	RIM only
Vim	2.5	2	1	RIM only
Ywhah	2.7125	0.875	0.875	RIM only
Actr1a	1.25	3.5	1.5	ELKS2β only
Actr1b	1.57143	6.28571	0.857143	ELKS2β only
Actr3	1	4	1	ELKS2β only
Add2	2	3.10294	0.764706	ELKS2β only
Akr1b1	2.05	3.1	0.85	ELKS2β only
Ap3m2	0.9	2.6	0.7	ELKS2β only
Apoa1	1	3	1	ELKS2β only
Apoe	1	2.5	1	ELKS2β only
Arhgap1	1	2.5	0.75	ELKS2β only
Arpc4	1.79167	2.625	1.29167	ELKS2β only
Arpc5l	1	4	1	ELKS2β only
Atp2b3	1.97222	2.5	1.94444	ELKS2β only
Atp6v0a1	1.125	2.625	2.125	ELKS2β only
Atp6v0d1	2	2.5	1	ELKS2β only
Atp6v1a	2.40934	3.19505	1.32692	ELKS2β only
Atp6v1e2	2	5	1	ELKS2β only
Atp6v1g2	1	4	2	ELKS2β only
Basp1	2.07143	4.0119	1.7381	ELKS2β only
Bsg	1	4	1	ELKS2β only
Btf3l4	1	3.5	1	ELKS2β only
C2cd2l	1	3.5	1	ELKS2β only
Cadm3	2.16667	3.33333	1	ELKS2β only
Calml3	2	3	0.75	ELKS2β only
Calr	0.8125	3.5625	0.5625	ELKS2β only
Camk4	1	3.5	1	ELKS2β only
Capza1	1	2.5	1	ELKS2β only
Capza2	1.40278	2.54167	0.861111	ELKS2β only
Cct4	2.25	6.25	0.75	ELKS2β only
Cct6a	1.41667	2.91667	0.666667	ELKS2β only
Cd200	1.5	3.5	1	ELKS2β only
Cend1	2.16667	3.58333	2.25	ELKS2β only
Clic4	1	2.5	1.5	ELKS2β only
Col19a1	1	2.5	1	ELKS2β only
Cops3	0.75	3.25	0.75	ELKS2β only
Cops4	1	4	1	ELKS2β only
Cops7a	1	2.5	1	ELKS2β only
Ctbp1	0.833333	3.16667	1	ELKS2β only
Ctnnb1	0.961538	5.96154	0.846154	ELKS2β only
Ctsd	2.16667	5.5	0.833333	ELKS2β only
Ctsl	1	2.5	1	ELKS2β only
Cul3	1	2.5	1.5	ELKS2β only
Cyb5r1	2	3.5	1	ELKS2β only
Dctn2	1	4.5	1	ELKS2β only
Dctn4	2	2.75	1.25	ELKS2β only
Dpysl4	1.875	5.29167	1.125	ELKS2β only
Dst	1	2.5	1	ELKS2β only
Dtd1	2.33333	4	1.16667	ELKS2β only
Dusp3	1	3.5	1	ELKS2β only
Eef1b	1.5	4.5	1.5	ELKS2β only
Efhd2	1	2.5	1	ELKS2β only
Eif4h	1	4	1	ELKS2β only
Elob	2	3	1	ELKS2β only
Ezr	1	3.5	1	ELKS2β only
Fabp5	2	5	1	ELKS2β only
Gad2	1	3.5	1	ELKS2β only
Gnal	1.66667	3.16667	1	ELKS2β only
Gnaq	1.5	3.5	1	ELKS2β only
Gng7	2.25	3.25	0.75	ELKS2β only
H2afz	1	3	1	ELKS2β only
Hba	2.04464	2.97321	1.05357	ELKS2β only
Hbbt1	1	3	2	ELKS2β only
Hnrnpa1	1	3	1.5	ELKS2β only
Hnrnpa2b1	1	4	1	ELKS2β only
Hnrnpk	1.66667	3	0.666667	ELKS2β only
Hnrnpl	1.3	3.4	0.7	ELKS2β only
Hp	2	3	1	ELKS2β only
Hprt1	2	3.5	1	ELKS2β only
Hyou1	2	2.5	1	ELKS2β only
Itih3	1	3	1	ELKS2β only
Kif5b	1	2.5	1	ELKS2β only
Krt24	1	4	1	ELKS2β only
Lgalsl	1.5	3.5	1	ELKS2β only
Mbp	1.88211	2.70316	1.04105	ELKS2β only
Mtco2	1	3	2	ELKS2β only
Ncald	1	2.5	1	ELKS2β only
Ncan	1	3	1	ELKS2β only
Ndrg2	2.38889	2.77778	1.33333	ELKS2β only
Nebl	1	5.5	1	ELKS2β only
Nono	1.5	3.5	0.75	ELKS2β only
Npm1	1.5	3	1	ELKS2β only
Ntm	0.666667	3	1.33333	ELKS2β only
Nudc	1	2.5	1	ELKS2β only
Ola1	1	2.5	1	ELKS2β only
Oscp1	1	2.5	1	ELKS2β only
Pak1	2	3.5	1	ELKS2β only
Pak2	1	2.5	1	ELKS2β only
Pcdh1	1.5	6.5	1	ELKS2β only
Pcp4	1.5	15	1	ELKS2β only
Pcp4l1	1	3	1	ELKS2β only
Pcsk1n	1	5	1	ELKS2β only
Pde1a	1.125	3	1	ELKS2β only
Pdpk1	1	2.5	1	ELKS2β only
Pitpna	2.3	4	0.7	ELKS2β only
Plaa	1	3.5	1	ELKS2β only
Ppa1	1	8	1	ELKS2β only
Ppib	2	2.5	1	ELKS2β only
Ppp1r7	1	3	1	ELKS2β only
Ppp2r1a	1.5	3	1.5	ELKS2β only
Ppp3cb	1.8	3.6	1.4	ELKS2β only
Prkar2a	2	2.5	1	ELKS2β only
Psma2	1	2.5	1	ELKS2β only
Psma5	1.25	2.75	0.75	ELKS2β only
Psmd4	1	2.5	1	ELKS2β only
Pzp	1	3	1	ELKS2β only
Rab7a	2.36364	2.70455	1	ELKS2β only
Rap1gds1	1.25	2.75	0.75	ELKS2β only
Rph3a	1.72222	3.5	1.55556	ELKS2β only
Rpl28	1	2.5	1	ELKS2β only
Rps9	1.25	2.75	1.75	ELKS2β only
Rufy3	1.5	2.5	1	ELKS2β only
Sec22b	2.08333	2.58333	1.16667	ELKS2β only
Sept4	1	3.5	1	ELKS2β only
Sept9	1	2.5	1	ELKS2β only
Serpina1b	1	2.5	1	ELKS2β only
Sh3gl2	2.25	4.25	2	ELKS2β only
Skp1	1.25	3.25	1.25	ELKS2β only
Slc6a9	1	3	1.5	ELKS2β only
Slc9a3r1	1	3	1	ELKS2β only
Src	1.66667	4.33333	1.33333	ELKS2β only
Stmn1	1	4	1	ELKS2β only
Svip	1	2.5	1	ELKS2β only
Synpo	1.42857	5.64286	0.714286	ELKS2β only
Tagln3	1.125	4.625	0.75	ELKS2β only
Tceal5	1	3	1	ELKS2β only
Tln2	1	3	1	ELKS2β only
Tmod2	1	4.5	1	ELKS2β only
Tpm1	1	3	1	ELKS2β only
Tpm2	2	2.5	1	ELKS2β only
Tpm3	1	4.5	1	ELKS2β only
Tubb2a	1	4	1.9	ELKS2β only
Twf1	1.5	4.125	0.875	ELKS2β only
Txn	1.5	11	1	ELKS2β only
Uba5	2	2.5	1	ELKS2β only
Ube2v2	1	4	1	ELKS2β only
Ubqln4	1	2.5	1	ELKS2β only
Uchl1	1.11538	2.54396	0.89011	ELKS2β only
Uchl3	1	3	1	ELKS2β only
Usp14	1.16667	6	1	ELKS2β only
Vapb	1	4.5	1	ELKS2β only
Wipf3	0.75	2.5	0.75	ELKS2β only
Add3	1.33333	0.766667	3.73333	Cavβ4 only
C1qb	1	1	2.5	Cavβ4 only
Cacna1a	1	1	2.5	Cavβ4 only
Cacna1b	1	1	6	Cavβ4 only
Cacna1e	1	1	4	Cavβ4 only
Cacnb1	1	1	12.5	Cavβ4 only
Cacng8	2	1.83333	3.33333	Cavβ4 only
Cbarp	1	1	6	Cavβ4 only
Fam49a	1.4	1.5	3.6	Cavβ4 only
Hdac11	1	0.75	2.75	Cavβ4 only
Huwe1	2	2	2.5	Cavβ4 only
Isoc1	1.75	1	2.75	Cavβ4 only
Kbtbd11	1.08333	2.33333	2.75	Cavβ4 only
Kcnj10	1	1	3	Cavβ4 only
Kif21a	0.954545	2.31818	2.72727	Cavβ4 only
Lrguk	1	1	2.5	Cavβ4 only
Lypla2	1	2.25	3.75	Cavβ4 only
Mlc1	0.75	0.75	3	Cavβ4 only
Myo5a	0.5	1.35714	2.82143	Cavβ4 only
Ncam2	2.19118	2.33824	4.32353	Cavβ4 only
Plec	1.25	2.25	2.5	Cavβ4 only
Ppm1e	1.5	1.25	3	Cavβ4 only
Rpl5	1	1	5	Cavβ4 only
Rpn2	1.45455	1.86364	2.68182	Cavβ4 only
Scamp3	2	2	2.5	Cavβ4 only
Slc2a13	2	1.5	3	Cavβ4 only
Slc6a1	1.875	2.125	3.5625	Cavβ4 only
Vps26a	0.9	2.3	2.7	Cavβ4 only
Vps29	0.875	1	4.625	Cavβ4 only
Wwc2	1	1	3	Cavβ4 only

## Sheet: Fig.3-SD1 peptides RIM cKODA
Figure 3 - Source Data 1
peptide count in RIM cKODA
reference	Gene Symbol	Annotation	RIMPPCP-1	RIMPPCP-2	ELKS2beta-1	ELKS2beta-2	CaVbeta4- 1	CaVbeta4- 2	BirA- tdTomato- 1	BirA- tdTomato- 2
tr|Q9CPN9|Q9CPN9_MOUSE	2210010C04Rik	Putative uncharacterized protein OS=Mus musculus GN=2210010C04Rik PE=1 SV=1	1	0	0	1	0	1	0	1
sp|Q3UHJ0|AAK1_MOUSE	Aak1	AP2-associated protein kinase 1 OS=Mus musculus GN=Aak1 PE=1 SV=2	22	21	17	10	14	12	14	18
sp|Q8R0P4|AAMDC_MOUSE	Aamdc	Mth938 domain-containing protein OS=Mus musculus GN=Aamdc PE=1 SV=1	4	3	3	0	2	5	3	2
sp|Q8BGQ7|SYAC_MOUSE	Aars	Alanine--tRNA ligase, cytoplasmic OS=Mus musculus GN=Aars PE=1 SV=1	0	1	0	0	0	0	2	1
sp|P61922|GABT_MOUSE	Abat	4-aminobutyrate aminotransferase, mitochondrial OS=Mus musculus GN=Abat PE=1 SV=1	11	15	12	9	5	10	15	18
sp|Q61102|ABCB7_MOUSE	Abcb7	ATP-binding cassette sub-family B member 7, mitochondrial OS=Mus musculus GN=Abcb7 PE=1 SV=3	0	0	0	0	0	1	0	0
sp|Q9CXJ4|ABCB8_MOUSE	Abcb8	ATP-binding cassette sub-family B member 8, mitochondrial OS=Mus musculus GN=Abcb8 PE=1 SV=1	0	0	0	0	0	0	0	1
sp|P55096|ABCD3_MOUSE	Abcd3	ATP-binding cassette sub-family D member 3 OS=Mus musculus GN=Abcd3 PE=1 SV=2	0	2	0	0	0	0	0	0
sp|Q9Z1Q2|ABHGA_MOUSE	Abhd16a	Protein ABHD16A OS=Mus musculus GN=Abhd16a PE=1 SV=3	0	0	1	0	0	0	0	0
sp|Q8R2Y0|ABHD6_MOUSE	Abhd6	Monoacylglycerol lipase ABHD6 OS=Mus musculus GN=Abhd6 PE=1 SV=1	0	1	0	0	0	0	0	1
sp|Q8BL65|ABLM2_MOUSE	Ablim2	Actin-binding LIM protein 2 OS=Mus musculus GN=Ablim2 PE=1 SV=1	0	1	0	0	0	0	0	0
sp|Q5SSL4|ABR_MOUSE	Abr	Active breakpoint cluster region-related protein OS=Mus musculus GN=Abr PE=1 SV=1	2	2	3	0	0	3	0	5
sp|Q5SWU9|ACACA_MOUSE	Acaca	Acetyl-CoA carboxylase 1 OS=Mus musculus GN=Acaca PE=1 SV=1	1	4	2	3	1	2	0	5
sp|E9Q4Z2|ACACB_MOUSE	Acacb	Acetyl-CoA carboxylase 2 OS=Mus musculus GN=Acacb PE=1 SV=1	0	1	1	2	1	2	0	0
sp|Q9D7B6|ACAD8_MOUSE	Acad8	Isobutyryl-CoA dehydrogenase, mitochondrial OS=Mus musculus GN=Acad8 PE=1 SV=2	0	0	0	1	0	0	0	0
sp|Q8JZN5|ACAD9_MOUSE	Acad9	Acyl-CoA dehydrogenase family member 9, mitochondrial OS=Mus musculus GN=Acad9 PE=1 SV=2	0	6	0	0	0	0	3	0
sp|P51174|ACADL_MOUSE	Acadl	Long-chain specific acyl-CoA dehydrogenase, mitochondrial OS=Mus musculus GN=Acadl PE=1 SV=2	3	3	4	6	4	4	3	3
sp|Q9DBL1|ACDSB_MOUSE	Acadsb	Short/branched chain specific acyl-CoA dehydrogenase, mitochondrial OS=Mus musculus GN=Acadsb PE=1 SV=1	0	0	0	0	0	0	1	1
sp|Q8QZT1|THIL_MOUSE	Acat1	Acetyl-CoA acetyltransferase, mitochondrial OS=Mus musculus GN=Acat1 PE=1 SV=1	10	14	12	10	9	12	12	11
sp|Q8CAY6|THIC_MOUSE	Acat2	Acetyl-CoA acetyltransferase, cytosolic OS=Mus musculus GN=Acat2 PE=1 SV=2	0	0	0	0	0	0	0	3
sp|P21836|ACES_MOUSE	Ache	Acetylcholinesterase OS=Mus musculus GN=Ache PE=1 SV=1	0	0	0	0	0	0	2	1
sp|Q91V92|ACLY_MOUSE	Acly	ATP-citrate synthase OS=Mus musculus GN=Acly PE=1 SV=1	7	12	5	4	3	3	7	13
sp|P28271|ACOC_MOUSE	Aco1	Cytoplasmic aconitate hydratase OS=Mus musculus GN=Aco1 PE=1 SV=3	0	0	0	1	0	0	0	0
sp|Q99KI0|ACON_MOUSE	Aco2	Aconitate hydratase, mitochondrial OS=Mus musculus GN=Aco2 PE=1 SV=1	29	27	26	22	22	27	23	31
sp|Q32MW3|ACO10_MOUSE	Acot10	Acyl-coenzyme A thioesterase 10, mitochondrial OS=Mus musculus GN=Acot10 PE=2 SV=1	0	2	0	1	0	1	1	2
sp|Q9CQR4|ACO13_MOUSE	Acot13	Acyl-coenzyme A thioesterase 13 OS=Mus musculus GN=Acot13 PE=1 SV=1	0	2	1	2	2	3	2	3
sp|Q9QYR9|ACOT2_MOUSE	Acot2	Acyl-coenzyme A thioesterase 2, mitochondrial OS=Mus musculus GN=Acot2 PE=1 SV=2	0	1	0	0	0	0	0	0
sp|Q91V12|BACH_MOUSE	Acot7	Cytosolic acyl coenzyme A thioester hydrolase OS=Mus musculus GN=Acot7 PE=1 SV=2	9	10	7	10	8	8	9	8
sp|Q9R0X4|ACOT9_MOUSE	Acot9	Acyl-coenzyme A thioesterase 9, mitochondrial OS=Mus musculus GN=Acot9 PE=1 SV=1	0	1	0	0	0	1	0	1
sp|Q9D358|PPAC_MOUSE	Acp1	Low molecular weight phosphotyrosine protein phosphatase OS=Mus musculus GN=Acp1 PE=1 SV=3	2	2	2	1	1	1	0	0
sp|Q99PU5|ACBG1_MOUSE	Acsbg1	Long-chain-fatty-acid--CoA ligase ACSBG1 OS=Mus musculus GN=Acsbg1 PE=1 SV=1	6	7	4	4	4	4	9	7
sp|Q8VCW8|ACSF2_MOUSE	Acsf2	Acyl-CoA synthetase family member 2, mitochondrial OS=Mus musculus GN=Acsf2 PE=1 SV=1	0	4	2	3	3	1	3	5
sp|P41216|ACSL1_MOUSE	Acsl1	Long-chain-fatty-acid--CoA ligase 1 OS=Mus musculus GN=Acsl1 PE=1 SV=2	0	0	0	0	0	3	3	0
sp|Q9CZW4|ACSL3_MOUSE	Acsl3	Long-chain-fatty-acid--CoA ligase 3 OS=Mus musculus GN=Acsl3 PE=1 SV=2	1	2	2	3	0	1	1	1
sp|Q91WC3|ACSL6_MOUSE	Acsl6	Long-chain-fatty-acid--CoA ligase 6 OS=Mus musculus GN=Acsl6 PE=1 SV=1	2	5	4	1	2	5	4	8
sp|Q99NB1|ACS2L_MOUSE	Acss1	Acetyl-coenzyme A synthetase 2-like, mitochondrial OS=Mus musculus GN=Acss1 PE=1 SV=1	0	3	0	0	0	0	0	0
sp|P62737|ACTA_MOUSE	Acta2	Actin, aortic smooth muscle OS=Mus musculus GN=Acta2 PE=1 SV=1	3	5	1	4	2	3	5	4
sp|P60710|ACTB_MOUSE	Actb	Actin, cytoplasmic 1 OS=Mus musculus GN=Actb PE=1 SV=1	33	39	37	30	32	35	43	40
sp|Q7TPR4|ACTN1_MOUSE	Actn1	Alpha-actinin-1 OS=Mus musculus GN=Actn1 PE=1 SV=1	0	2	0	0	0	0	0	0
sp|P57780|ACTN4_MOUSE	Actn4	Alpha-actinin-4 OS=Mus musculus GN=Actn4 PE=1 SV=1	0	0	0	0	0	0	1	0
sp|P61164|ACTZ_MOUSE	Actr1a	Alpha-centractin OS=Mus musculus GN=Actr1a PE=1 SV=1	2	3	3	0	0	2	2	0
sp|Q8R5C5|ACTY_MOUSE	Actr1b	Beta-centractin OS=Mus musculus GN=Actr1b PE=1 SV=1	2	3	3	4	2	3	4	5
sp|P61161|ARP2_MOUSE	Actr2	Actin-related protein 2 OS=Mus musculus GN=Actr2 PE=1 SV=1	3	5	2	2	2	3	7	5
sp|Q99JY9|ARP3_MOUSE	Actr3	Actin-related protein 3 OS=Mus musculus GN=Actr3 PE=1 SV=3	0	0	0	0	0	0	0	2
sp|Q641P0|ARP3B_MOUSE	Actr3b	Actin-related protein 3B OS=Mus musculus GN=Actr3b PE=1 SV=1	0	0	0	0	0	0	1	0
sp|Q9R1V4|ADA11_MOUSE	Adam11	Disintegrin and metalloproteinase domain-containing protein 11 OS=Mus musculus GN=Adam11 PE=1 SV=2	0	0	0	0	0	0	0	1
sp|Q9R1V6|ADA22_MOUSE	Adam22	Disintegrin and metalloproteinase domain-containing protein 22 OS=Mus musculus GN=Adam22 PE=1 SV=2	4	4	5	2	2	2	5	3
sp|Q9R1V7|ADA23_MOUSE	Adam23	Disintegrin and metalloproteinase domain-containing protein 23 OS=Mus musculus GN=Adam23 PE=1 SV=1	3	4	2	2	0	3	0	3
tr|E9Q4D1|E9Q4D1_MOUSE	Adamts17	A disintegrin-like and metallopeptidase (reprolysin type) with thrombospondin type 1 motif, 17 OS=Mus musculus GN=Adamts17 PE=1 SV=1	0	0	0	0	0	0	0	1
sp|P84309|ADCY5_MOUSE	Adcy5	Adenylate cyclase type 5 OS=Mus musculus GN=Adcy5 PE=1 SV=2	9	9	9	5	5	4	8	6
sp|P51830|ADCY9_MOUSE	Adcy9	Adenylate cyclase type 9 OS=Mus musculus GN=Adcy9 PE=1 SV=1	1	0	0	0	0	0	0	1
sp|Q9QYC0|ADDA_MOUSE	Add1	Alpha-adducin OS=Mus musculus GN=Add1 PE=1 SV=2	14	22	15	15	13	15	15	14
sp|Q9QYB8|ADDB_MOUSE	Add2	Beta-adducin OS=Mus musculus GN=Add2 PE=1 SV=4	5	13	7	3	2	5	11	10
sp|Q9QYB5|ADDG_MOUSE	Add3	Gamma-adducin OS=Mus musculus GN=Add3 PE=1 SV=2	5	5	4	4	3	7	3	5
sp|Q80TR1|AGRL1_MOUSE	Adgrl1	Adhesion G protein-coupled receptor L1 OS=Mus musculus GN=Adgrl1 PE=1 SV=2	1	3	0	0	0	1	0	3
sp|P55264|ADK_MOUSE	Adk	Adenosine kinase OS=Mus musculus GN=Adk PE=1 SV=2	0	3	1	0	0	0	0	2
sp|Q6PDY2|AEDO_MOUSE	Ado	2-aminoethanethiol dioxygenase OS=Mus musculus GN=Ado PE=1 SV=2	0	0	1	0	0	0	0	0
sp|Q9JKV1|ADRM1_MOUSE	Adrm1	Proteasomal ubiquitin receptor ADRM1 OS=Mus musculus GN=Adrm1 PE=1 SV=2	1	1	1	1	1	1	1	1
sp|P46664|PURA2_MOUSE	Adss	Adenylosuccinate synthetase isozyme 2 OS=Mus musculus GN=Adss PE=1 SV=2	0	0	0	1	0	1	2	2
sp|P28650|PURA1_MOUSE	Adssl1	Adenylosuccinate synthetase isozyme 1 OS=Mus musculus GN=Adssl1 PE=1 SV=2	0	0	0	0	0	0	0	1
sp|Q3UHD9|AGAP2_MOUSE	Agap2	Arf-GAP with GTPase, ANK repeat and PH domain-containing protein 2 OS=Mus musculus GN=Agap2 PE=1 SV=1	1	0	0	0	0	0	1	0
sp|Q8VHH5|AGAP3_MOUSE	Agap3	Arf-GAP with GTPase, ANK repeat and PH domain-containing protein 3 OS=Mus musculus GN=Agap3 PE=1 SV=1	1	4	0	0	0	0	2	3
sp|Q9ESW4|AGK_MOUSE	Agk	Acylglycerol kinase, mitochondrial OS=Mus musculus GN=Agk PE=1 SV=1	0	0	0	0	0	0	0	2
tr|F8VPN4|F8VPN4_MOUSE	Agl	Amylo-1,6-glucosidase, 4-alpha-glucanotransferase OS=Mus musculus GN=Agl PE=1 SV=1	0	2	0	0	0	0	0	0
sp|O35083|PLCA_MOUSE	Agpat1	1-acyl-sn-glycerol-3-phosphate acyltransferase alpha OS=Mus musculus GN=Agpat1 PE=1 SV=1	0	0	0	0	0	0	0	1
sp|Q9D517|PLCC_MOUSE	Agpat3	1-acyl-sn-glycerol-3-phosphate acyltransferase gamma OS=Mus musculus GN=Agpat3 PE=1 SV=2	2	0	0	0	0	0	3	3
sp|Q8K4X7|PLCD_MOUSE	Agpat4	1-acyl-sn-glycerol-3-phosphate acyltransferase delta OS=Mus musculus GN=Agpat4 PE=1 SV=1	1	0	0	0	0	0	1	0
sp|P50247|SAHH_MOUSE	Ahcy	Adenosylhomocysteinase OS=Mus musculus GN=Ahcy PE=1 SV=3	3	4	2	2	3	5	3	4
sp|Q80SW1|SAHH2_MOUSE	Ahcyl1	S-adenosylhomocysteine hydrolase-like protein 1 OS=Mus musculus GN=Ahcyl1 PE=1 SV=1	3	5	3	2	2	5	5	6
sp|Q68FL4|SAHH3_MOUSE	Ahcyl2	Putative adenosylhomocysteinase 3 OS=Mus musculus GN=Ahcyl2 PE=1 SV=1	5	6	6	5	5	6	5	5
sp|Q8BK64|AHSA1_MOUSE	Ahsa1	Activator of 90 kDa heat shock protein ATPase homolog 1 OS=Mus musculus GN=Ahsa1 PE=1 SV=2	2	3	2	2	0	2	5	2
sp|Q9Z0X1|AIFM1_MOUSE	Aifm1	Apoptosis-inducing factor 1, mitochondrial OS=Mus musculus GN=Aifm1 PE=1 SV=1	3	2	3	2	1	3	2	4
sp|Q8R010|AIMP2_MOUSE	Aimp2	Aminoacyl tRNA synthase complex-interacting multifunctional protein 2 OS=Mus musculus GN=Aimp2 PE=1 SV=2	0	2	0	0	0	0	1	0
sp|Q9R0Y5|KAD1_MOUSE	Ak1	Adenylate kinase isoenzyme 1 OS=Mus musculus GN=Ak1 PE=1 SV=1	1	1	1	0	0	0	0	0
sp|D3YVF0|AKAP5_MOUSE	Akap5	A-kinase anchor protein 5 OS=Mus musculus GN=Akap5 PE=1 SV=2	5	6	8	4	2	4	4	3
sp|Q9JII6|AK1A1_MOUSE	Akr1a1	Alcohol dehydrogenase [NADP(+)] OS=Mus musculus GN=Akr1a1 PE=1 SV=3	1	3	0	0	0	0	2	1
sp|P45376|ALDR_MOUSE	Akr1b1	Aldose reductase OS=Mus musculus GN=Akr1b1 PE=1 SV=3	2	6	1	0	3	4	5	5
sp|P07724|ALBU_MOUSE	Alb	Serum albumin OS=Mus musculus GN=Alb PE=1 SV=3	5	7	5	6	4	7	3	5
sp|Q61490|CD166_MOUSE	Alcam	CD166 antigen OS=Mus musculus GN=Alcam PE=1 SV=3	1	5	3	0	0	2	4	2
sp|Q9Z110|P5CS_MOUSE	Aldh18a1	Delta-1-pyrroline-5-carboxylate synthase OS=Mus musculus GN=Aldh18a1 PE=1 SV=2	0	2	0	0	0	0	0	0
sp|P24549|AL1A1_MOUSE	Aldh1a1	Retinal dehydrogenase 1 OS=Mus musculus GN=Aldh1a1 PE=1 SV=5	2	1	0	0	1	3	3	6
sp|Q8R0Y6|AL1L1_MOUSE	Aldh1l1	Cytosolic 10-formyltetrahydrofolate dehydrogenase OS=Mus musculus GN=Aldh1l1 PE=1 SV=1	4	11	6	1	3	5	8	6
sp|P47738|ALDH2_MOUSE	Aldh2	Aldehyde dehydrogenase, mitochondrial OS=Mus musculus GN=Aldh2 PE=1 SV=1	1	4	1	2	0	5	6	5
sp|Q8BWF0|SSDH_MOUSE	Aldh5a1	Succinate-semialdehyde dehydrogenase, mitochondrial OS=Mus musculus GN=Aldh5a1 PE=1 SV=1	5	7	3	4	1	8	6	7
sp|Q9EQ20|MMSA_MOUSE	Aldh6a1	Methylmalonate-semialdehyde dehydrogenase [acylating], mitochondrial OS=Mus musculus GN=Aldh6a1 PE=1 SV=1	0	2	0	0	0	0	0	2
sp|Q9DBF1|AL7A1_MOUSE	Aldh7a1	Alpha-aminoadipic semialdehyde dehydrogenase OS=Mus musculus GN=Aldh7a1 PE=1 SV=4	0	1	0	2	0	2	0	2
sp|Q9JLJ2|AL9A1_MOUSE	Aldh9a1	4-trimethylaminobutyraldehyde dehydrogenase OS=Mus musculus GN=Aldh9a1 PE=1 SV=1	1	1	0	0	0	1	2	1
sp|P05064|ALDOA_MOUSE	Aldoa	Fructose-bisphosphate aldolase A OS=Mus musculus GN=Aldoa PE=1 SV=2	27	37	31	24	21	27	27	24
sp|P05063|ALDOC_MOUSE	Aldoc	Fructose-bisphosphate aldolase C OS=Mus musculus GN=Aldoc PE=1 SV=4	13	13	11	11	7	11	14	20
sp|Q9DBE8|ALG2_MOUSE	Alg2	Alpha-1,3/1,6-mannosyltransferase ALG2 OS=Mus musculus GN=Alg2 PE=1 SV=2	0	3	0	0	0	0	0	2
sp|Q7TQF7|AMPH_MOUSE	Amph	Amphiphysin OS=Mus musculus GN=Amph PE=1 SV=1	0	1	0	1	0	1	1	1
sp|Q02357|ANK1_MOUSE	Ank1	Ankyrin-1 OS=Mus musculus GN=Ank1 PE=1 SV=2	0	0	0	0	0	1	0	0
sp|Q8C8R3|ANK2_MOUSE	Ank2	Ankyrin-2 OS=Mus musculus GN=Ank2 PE=1 SV=2	43	47	35	23	24	36	25	42
sp|G5E8K5|ANK3_MOUSE	Ank3	Ankyrin-3 OS=Mus musculus GN=Ank3 PE=1 SV=1	6	10	5	5	3	7	8	12
sp|Q810B6|ANFY1_MOUSE	Ankfy1	Rabankyrin-5 OS=Mus musculus GN=Ankfy1 PE=1 SV=2	0	0	0	0	0	1	2	0
sp|Q8BIZ1|ANS1B_MOUSE	Anks1b	Ankyrin repeat and sterile alpha motif domain-containing protein 1B OS=Mus musculus GN=Anks1b PE=1 SV=3	0	4	0	1	0	3	0	2
sp|P48036|ANXA5_MOUSE	Anxa5	Annexin A5 OS=Mus musculus GN=Anxa5 PE=1 SV=1	0	0	0	0	0	2	1	4
sp|Q07076|ANXA7_MOUSE	Anxa7	Annexin A7 OS=Mus musculus GN=Anxa7 PE=1 SV=2	0	0	0	0	0	0	1	0
sp|O35643|AP1B1_MOUSE	Ap1b1	AP-1 complex subunit beta-1 OS=Mus musculus GN=Ap1b1 PE=1 SV=2	0	0	0	0	0	0	4	0
sp|P22892|AP1G1_MOUSE	Ap1g1	AP-1 complex subunit gamma-1 OS=Mus musculus GN=Ap1g1 PE=1 SV=3	0	2	0	0	0	1	0	0
sp|P35585|AP1M1_MOUSE	Ap1m1	AP-1 complex subunit mu-1 OS=Mus musculus GN=Ap1m1 PE=1 SV=3	0	4	2	0	0	2	1	0
sp|P61967|AP1S1_MOUSE	Ap1s1	AP-1 complex subunit sigma-1A OS=Mus musculus GN=Ap1s1 PE=1 SV=1	1	1	1	0	0	0	0	1
sp|P17426|AP2A1_MOUSE	Ap2a1	AP-2 complex subunit alpha-1 OS=Mus musculus GN=Ap2a1 PE=1 SV=1	17	19	13	13	13	18	17	20
sp|P17427|AP2A2_MOUSE	Ap2a2	AP-2 complex subunit alpha-2 OS=Mus musculus GN=Ap2a2 PE=1 SV=2	19	21	14	16	12	22	24	25
sp|Q9DBG3|AP2B1_MOUSE	Ap2b1	AP-2 complex subunit beta OS=Mus musculus GN=Ap2b1 PE=1 SV=1	20	25	21	18	12	20	26	24
sp|P84091|AP2M1_MOUSE	Ap2m1	AP-2 complex subunit mu OS=Mus musculus GN=Ap2m1 PE=1 SV=1	11	17	12	12	8	13	11	17
sp|P62743|AP2S1_MOUSE	Ap2s1	AP-2 complex subunit sigma OS=Mus musculus GN=Ap2s1 PE=1 SV=1	3	5	0	5	3	4	3	5
sp|Q9JME5|AP3B2_MOUSE	Ap3b2	AP-3 complex subunit beta-2 OS=Mus musculus GN=Ap3b2 PE=1 SV=2	7	8	4	3	4	4	4	7
sp|O54774|AP3D1_MOUSE	Ap3d1	AP-3 complex subunit delta-1 OS=Mus musculus GN=Ap3d1 PE=1 SV=1	4	9	5	7	7	11	6	11
sp|Q8R2R9|AP3M2_MOUSE	Ap3m2	AP-3 complex subunit mu-2 OS=Mus musculus GN=Ap3m2 PE=1 SV=1	3	0	0	0	0	1	1	2
sp|Q9DCR2|AP3S1_MOUSE	Ap3s1	AP-3 complex subunit sigma-1 OS=Mus musculus GN=Ap3s1 PE=1 SV=2	0	1	1	0	0	0	1	0
sp|Q9QXJ1|APBB1_MOUSE	Apbb1	Amyloid beta A4 precursor protein-binding family B member 1 OS=Mus musculus GN=Apbb1 PE=1 SV=3	0	0	0	0	0	0	0	2
sp|P28352|APEX1_MOUSE	Apex1	DNA-(apurinic or apyrimidinic site) lyase OS=Mus musculus GN=Apex1 PE=1 SV=2	2	3	2	0	1	1	1	1
sp|Q9D7N9|APMAP_MOUSE	Apmap	Adipocyte plasma membrane-associated protein OS=Mus musculus GN=Apmap PE=1 SV=1	3	0	0	0	0	0	2	2
sp|P51910|APOD_MOUSE	Apod	Apolipoprotein D OS=Mus musculus GN=Apod PE=1 SV=1	2	0	0	0	0	0	0	0
sp|Q9DCZ4|MIC26_MOUSE	Apoo	MICOS complex subunit Mic26 OS=Mus musculus GN=Apoo PE=1 SV=2	2	2	2	1	1	1	2	2
sp|Q78IK4|MIC27_MOUSE	Apool	MICOS complex subunit Mic27 OS=Mus musculus GN=Apool PE=1 SV=1	2	1	1	0	0	0	2	0
sp|Q8K3H0|DP13A_MOUSE	Appl1	DCC-interacting protein 13-alpha OS=Mus musculus GN=Appl1 PE=1 SV=1	1	0	0	0	0	0	0	2
sp|P55088|AQP4_MOUSE	Aqp4	Aquaporin-4 OS=Mus musculus GN=Aqp4 PE=1 SV=2	0	2	2	2	2	1	1	2
sp|Q8BSL7|ARF2_MOUSE	Arf2	ADP-ribosylation factor 2 OS=Mus musculus GN=Arf2 PE=1 SV=2	7	7	6	6	7	6	8	6
sp|P61750|ARF4_MOUSE	Arf4	ADP-ribosylation factor 4 OS=Mus musculus GN=Arf4 PE=1 SV=2	0	2	2	0	0	2	0	1
sp|P84084|ARF5_MOUSE	Arf5	ADP-ribosylation factor 5 OS=Mus musculus GN=Arf5 PE=1 SV=2	7	11	9	7	10	8	8	9
sp|P62331|ARF6_MOUSE	Arf6	ADP-ribosylation factor 6 OS=Mus musculus GN=Arf6 PE=1 SV=2	1	4	2	1	2	1	2	2
sp|Q9EPJ9|ARFG1_MOUSE	Arfgap1	ADP-ribosylation factor GTPase-activating protein 1 OS=Mus musculus GN=Arfgap1 PE=1 SV=2	1	3	1	2	0	0	1	0
sp|Q5FWK3|RHG01_MOUSE	Arhgap1	Rho GTPase-activating protein 1 OS=Mus musculus GN=Arhgap1 PE=1 SV=1	0	1	1	0	0	0	1	2
sp|Q811P8|RHG32_MOUSE	Arhgap32	Rho GTPase-activating protein 32 OS=Mus musculus GN=Arhgap32 PE=1 SV=2	0	0	0	0	0	0	0	1
sp|Q99PT1|GDIR1_MOUSE	Arhgdia	Rho GDP-dissociation inhibitor 1 OS=Mus musculus GN=Arhgdia PE=1 SV=3	11	6	7	7	5	7	11	7
sp|Q61599|GDIR2_MOUSE	Arhgdib	Rho GDP-dissociation inhibitor 2 OS=Mus musculus GN=Arhgdib PE=1 SV=3	0	2	0	0	0	0	0	0
sp|Q60875|ARHG2_MOUSE	Arhgef2	Rho guanine nucleotide exchange factor 2 OS=Mus musculus GN=Arhgef2 PE=1 SV=4	1	0	0	0	0	0	0	0
sp|O88848|ARL6_MOUSE	Arl6	ADP-ribosylation factor-like protein 6 OS=Mus musculus GN=Arl6 PE=1 SV=1	0	1	0	0	0	0	0	0
sp|Q8R5J9|PRAF3_MOUSE	Arl6ip5	PRA1 family protein 3 OS=Mus musculus GN=Arl6ip5 PE=1 SV=2	0	0	0	1	0	1	0	1
sp|Q9R0Q6|ARC1A_MOUSE	Arpc1a	Actin-related protein 2/3 complex subunit 1A OS=Mus musculus GN=Arpc1a PE=1 SV=1	8	4	4	5	6	6	5	8
sp|Q9CVB6|ARPC2_MOUSE	Arpc2	Actin-related protein 2/3 complex subunit 2 OS=Mus musculus GN=Arpc2 PE=1 SV=3	4	6	2	2	3	3	6	4
sp|Q9JM76|ARPC3_MOUSE	Arpc3	Actin-related protein 2/3 complex subunit 3 OS=Mus musculus GN=Arpc3 PE=1 SV=3	0	1	1	2	0	1	1	4
sp|P59999|ARPC4_MOUSE	Arpc4	Actin-related protein 2/3 complex subunit 4 OS=Mus musculus GN=Arpc4 PE=1 SV=3	6	3	3	3	2	3	6	4
sp|Q9D898|ARP5L_MOUSE	Arpc5l	Actin-related protein 2/3 complex subunit 5-like protein OS=Mus musculus GN=Arpc5l PE=1 SV=1	0	0	0	0	0	1	0	0
tr|B2RRQ1|B2RRQ1_MOUSE	Asic2	Amiloride-sensitive cation channel 1, neuronal (Degenerin) OS=Mus musculus GN=Asic2 PE=2 SV=1	1	0	0	0	0	0	0	0
sp|O54984|ASNA_MOUSE	Asna1	ATPase Asna1 OS=Mus musculus GN=Asna1 PE=1 SV=2	0	0	0	1	0	1	1	1
sp|Q61024|ASNS_MOUSE	Asns	Asparagine synthetase [glutamine-hydrolyzing] OS=Mus musculus GN=Asns PE=1 SV=3	0	0	0	0	0	0	1	0
sp|Q8C0M9|ASGL1_MOUSE	Asrgl1	Isoaspartyl peptidase/L-asparaginase OS=Mus musculus GN=Asrgl1 PE=1 SV=1	4	5	5	2	4	7	5	8
sp|P16460|ASSY_MOUSE	Ass1	Argininosuccinate synthase OS=Mus musculus GN=Ass1 PE=1 SV=1	0	2	2	2	0	2	2	0
sp|Q8K341|ATAT_MOUSE	Atat1	Alpha-tubulin N-acetyltransferase 1 OS=Mus musculus GN=Atat1 PE=1 SV=1	0	0	0	0	0	0	0	1
sp|Q8BHE3|ATCAY_MOUSE	Atcay	Caytaxin OS=Mus musculus GN=Atcay PE=1 SV=1	3	4	3	6	5	3	3	3
sp|Q9Z2A5|ATE1_MOUSE	Ate1	Arginyl-tRNA--protein transferase 1 OS=Mus musculus GN=Ate1 PE=1 SV=2	0	0	0	0	1	0	0	1
sp|Q9D906|ATG7_MOUSE	Atg7	Ubiquitin-like modifier-activating enzyme ATG7 OS=Mus musculus GN=Atg7 PE=1 SV=1	0	0	0	0	0	0	0	1
sp|Q9CWJ9|PUR9_MOUSE	Atic	Bifunctional purine biosynthesis protein PURH OS=Mus musculus GN=Atic PE=1 SV=2	0	1	0	0	0	0	1	1
sp|Q8BH66|ATLA1_MOUSE	Atl1	Atlastin-1 OS=Mus musculus GN=Atl1 PE=1 SV=1	1	5	1	0	2	2	4	5
sp|Q9Z1W8|AT12A_MOUSE	Atp12a	Potassium-transporting ATPase alpha chain 2 OS=Mus musculus GN=Atp12a PE=1 SV=3	5	5	5	4	6	4	6	7
sp|Q8VDN2|AT1A1_MOUSE	Atp1a1	Sodium/potassium-transporting ATPase subunit alpha-1 OS=Mus musculus GN=Atp1a1 PE=1 SV=1	39	51	41	27	25	38	44	37
sp|Q6PIE5|AT1A2_MOUSE	Atp1a2	Sodium/potassium-transporting ATPase subunit alpha-2 OS=Mus musculus GN=Atp1a2 PE=1 SV=1	32	31	21	17	23	33	33	27
sp|Q6PIC6|AT1A3_MOUSE	Atp1a3	Sodium/potassium-transporting ATPase subunit alpha-3 OS=Mus musculus GN=Atp1a3 PE=1 SV=1	40	54	43	29	37	36	56	44
sp|Q9WV27|AT1A4_MOUSE	Atp1a4	Sodium/potassium-transporting ATPase subunit alpha-4 OS=Mus musculus GN=Atp1a4 PE=1 SV=3	4	5	5	4	4	4	6	6
sp|P14094|AT1B1_MOUSE	Atp1b1	Sodium/potassium-transporting ATPase subunit beta-1 OS=Mus musculus GN=Atp1b1 PE=1 SV=1	11	6	9	9	10	11	9	11
sp|P14231|AT1B2_MOUSE	Atp1b2	Sodium/potassium-transporting ATPase subunit beta-2 OS=Mus musculus GN=Atp1b2 PE=1 SV=2	4	5	3	2	1	2	4	5
sp|P97370|AT1B3_MOUSE	Atp1b3	Sodium/potassium-transporting ATPase subunit beta-3 OS=Mus musculus GN=Atp1b3 PE=1 SV=1	0	2	0	1	1	0	0	2
sp|O55143|AT2A2_MOUSE	Atp2a2	Sarcoplasmic/endoplasmic reticulum calcium ATPase 2 OS=Mus musculus GN=Atp2a2 PE=1 SV=2	22	24	16	16	12	19	21	25
sp|G5E829|AT2B1_MOUSE	Atp2b1	Plasma membrane calcium-transporting ATPase 1 OS=Mus musculus GN=Atp2b1 PE=1 SV=1	22	24	15	10	10	16	21	19
sp|Q9R0K7|AT2B2_MOUSE	Atp2b2	Plasma membrane calcium-transporting ATPase 2 OS=Mus musculus GN=Atp2b2 PE=1 SV=2	16	26	16	13	8	18	27	19
tr|Q8C048|Q8C048_MOUSE	Atp2b3	Calcium-transporting ATPase OS=Mus musculus GN=Atp2b3 PE=1 SV=1	5	2	4	3	3	3	7	9
sp|Q6Q477|AT2B4_MOUSE	Atp2b4	Plasma membrane calcium-transporting ATPase 4 OS=Mus musculus GN=Atp2b4 PE=1 SV=1	20	24	24	19	17	24	25	19
sp|Q03265|ATPA_MOUSE	Atp5a1	ATP synthase subunit alpha, mitochondrial OS=Mus musculus GN=Atp5a1 PE=1 SV=1	50	61	42	43	40	57	78	66
sp|P56480|ATPB_MOUSE	Atp5b	ATP synthase subunit beta, mitochondrial OS=Mus musculus GN=Atp5b PE=1 SV=2	22	31	21	15	14	25	40	31
sp|Q91VR2|ATPG_MOUSE	Atp5c1	ATP synthase subunit gamma, mitochondrial OS=Mus musculus GN=Atp5c1 PE=1 SV=1	10	8	4	6	4	5	6	8
sp|Q9D3D9|ATPD_MOUSE	Atp5d	ATP synthase subunit delta, mitochondrial OS=Mus musculus GN=Atp5d PE=1 SV=1	0	0	0	0	0	2	1	1
sp|P56382|ATP5E_MOUSE	Atp5e	ATP synthase subunit epsilon, mitochondrial OS=Mus musculus GN=Atp5e PE=1 SV=2	0	0	0	0	0	2	0	0
sp|Q9CQQ7|AT5F1_MOUSE	Atp5f1	ATP synthase F(0) complex subunit B1, mitochondrial OS=Mus musculus GN=Atp5f1 PE=1 SV=1	3	5	2	2	0	1	7	7
sp|Q9DCX2|ATP5H_MOUSE	Atp5h	ATP synthase subunit d, mitochondrial OS=Mus musculus GN=Atp5h PE=1 SV=3	0	5	3	2	0	5	0	4
sp|Q06185|ATP5I_MOUSE	Atp5i	ATP synthase subunit e, mitochondrial OS=Mus musculus GN=Atp5i PE=1 SV=2	2	2	1	2	2	2	2	2
sp|P97450|ATP5J_MOUSE	Atp5j	ATP synthase-coupling factor 6, mitochondrial OS=Mus musculus GN=Atp5j PE=1 SV=1	0	1	0	0	0	5	0	0
sp|P56135|ATPK_MOUSE	Atp5j2	ATP synthase subunit f, mitochondrial OS=Mus musculus GN=Atp5j2 PE=1 SV=3	8	3	4	4	2	3	6	6
sp|Q9CPQ8|ATP5L_MOUSE	Atp5l	ATP synthase subunit g, mitochondrial OS=Mus musculus GN=Atp5l PE=1 SV=1	2	0	2	2	1	4	2	3
sp|Q9DB20|ATPO_MOUSE	Atp5o	ATP synthase subunit O, mitochondrial OS=Mus musculus GN=Atp5o PE=1 SV=1	2	4	2	2	2	7	4	6
sp|Q9Z1G4|VPP1_MOUSE	Atp6v0a1	V-type proton ATPase 116 kDa subunit a isoform 1 OS=Mus musculus GN=Atp6v0a1 PE=1 SV=3	2	1	1	2	4	4	0	4
sp|P51863|VA0D1_MOUSE	Atp6v0d1	V-type proton ATPase subunit d 1 OS=Mus musculus GN=Atp6v0d1 PE=1 SV=2	1	2	2	0	2	1	3	0
sp|P50516|VATA_MOUSE	Atp6v1a	V-type proton ATPase catalytic subunit A OS=Mus musculus GN=Atp6v1a PE=1 SV=2	9	10	6	8	7	8	15	15
sp|P62814|VATB2_MOUSE	Atp6v1b2	V-type proton ATPase subunit B, brain isoform OS=Mus musculus GN=Atp6v1b2 PE=1 SV=1	11	26	15	12	11	18	18	19
sp|Q9Z1G3|VATC1_MOUSE	Atp6v1c1	V-type proton ATPase subunit C 1 OS=Mus musculus GN=Atp6v1c1 PE=1 SV=4	0	1	2	1	1	1	4	2
sp|P50518|VATE1_MOUSE	Atp6v1e1	V-type proton ATPase subunit E 1 OS=Mus musculus GN=Atp6v1e1 PE=1 SV=2	1	3	0	0	0	0	1	0
sp|Q9D593|VATE2_MOUSE	Atp6v1e2	V-type proton ATPase subunit E 2 OS=Mus musculus GN=Atp6v1e2 PE=1 SV=1	0	1	0	0	0	0	1	1
sp|Q9WTT4|VATG2_MOUSE	Atp6v1g2	V-type proton ATPase subunit G 2 OS=Mus musculus GN=Atp6v1g2 PE=1 SV=1	0	0	0	0	0	0	0	1
sp|Q8BVE3|VATH_MOUSE	Atp6v1h	V-type proton ATPase subunit H OS=Mus musculus GN=Atp6v1h PE=1 SV=1	9	8	8	8	5	13	9	12
sp|P70704|AT8A1_MOUSE	Atp8a1	Phospholipid-transporting ATPase IA OS=Mus musculus GN=Atp8a1 PE=1 SV=2	8	7	10	4	4	6	7	12
sp|O70228|ATP9A_MOUSE	Atp9a	Probable phospholipid-transporting ATPase IIA OS=Mus musculus GN=Atp9a PE=1 SV=3	0	0	1	0	0	0	0	0
sp|Q811I0|ATPF1_MOUSE	Atpaf1	ATP synthase mitochondrial F1 complex assembly factor 1 OS=Mus musculus GN=Atpaf1 PE=1 SV=1	0	0	0	0	0	0	0	1
sp|P28658|ATX10_MOUSE	Atxn10	Ataxin-10 OS=Mus musculus GN=Atxn10 PE=1 SV=2	0	0	0	0	0	0	1	0
sp|Q9JLZ3|AUHM_MOUSE	Auh	Methylglutaconyl-CoA hydratase, mitochondrial OS=Mus musculus GN=Auh PE=1 SV=1	0	1	0	0	0	1	1	0
sp|Q91XV3|BASP1_MOUSE	Basp1	Brain acid soluble protein 1 OS=Mus musculus GN=Basp1 PE=1 SV=3	9	13	8	5	6	12	9	10
sp|Q61361|PGCB_MOUSE	Bcan	Brevican core protein OS=Mus musculus GN=Bcan PE=1 SV=2	3	4	4	2	2	4	4	3
sp|Q61334|BAP29_MOUSE	Bcap29	B-cell receptor-associated protein 29 OS=Mus musculus GN=Bcap29 PE=1 SV=1	0	0	0	0	0	0	0	1
sp|Q61335|BAP31_MOUSE	Bcap31	B-cell receptor-associated protein 31 OS=Mus musculus GN=Bcap31 PE=1 SV=4	1	1	0	0	1	1	2	1
sp|Q80YN3|BCAS1_MOUSE	Bcas1	Breast carcinoma-amplified sequence 1 homolog OS=Mus musculus GN=Bcas1 PE=1 SV=3	2	0	0	2	0	0	0	1
sp|Q8CCN5|BCAS3_MOUSE	Bcas3	Breast carcinoma-amplified sequence 3 homolog OS=Mus musculus GN=Bcas3 PE=1 SV=2	1	1	0	0	0	1	1	2
sp|Q80XN0|BDH_MOUSE	Bdh1	D-beta-hydroxybutyrate dehydrogenase, mitochondrial OS=Mus musculus GN=Bdh1 PE=1 SV=2	1	3	2	0	1	2	2	3
sp|O08539|BIN1_MOUSE	Bin1	Myc box-dependent-interacting protein 1 OS=Mus musculus GN=Bin1 PE=1 SV=1	2	2	0	2	0	3	1	0
sp|Q8R016|BLMH_MOUSE	Blmh	Bleomycin hydrolase OS=Mus musculus GN=Blmh PE=1 SV=1	0	1	1	1	0	1	0	1
sp|Q9CY64|BIEA_MOUSE	Blvra	Biliverdin reductase A OS=Mus musculus GN=Blvra PE=1 SV=1	0	1	0	0	0	1	1	1
sp|Q8R164|BPHL_MOUSE	Bphl	Valacyclovir hydrolase OS=Mus musculus GN=Bphl PE=1 SV=1	0	0	0	0	0	0	1	0
sp|Q9Z0S1|BPNT1_MOUSE	Bpnt1	3'(2'),5'-bisphosphate nucleotidase 1 OS=Mus musculus GN=Bpnt1 PE=1 SV=2	1	2	0	0	0	0	3	2
sp|P28028|BRAF_MOUSE	Braf	Serine/threonine-protein kinase B-raf OS=Mus musculus GN=Braf PE=1 SV=3	0	3	0	0	0	2	0	1
sp|Q8K2Q7|BROX_MOUSE	Brox	BRO1 domain-containing protein BROX OS=Mus musculus GN=Brox PE=1 SV=1	0	0	0	0	0	0	0	2
sp|Q5RJI5|BRSK1_MOUSE	Brsk1	Serine/threonine-protein kinase BRSK1 OS=Mus musculus GN=Brsk1 PE=1 SV=1	1	3	0	1	1	0	3	3
sp|Q69Z98|BRSK2_MOUSE	Brsk2	Serine/threonine-protein kinase BRSK2 OS=Mus musculus GN=Brsk2 PE=1 SV=2	0	1	0	0	0	0	0	0
sp|P18572|BASI_MOUSE	Bsg	Basigin OS=Mus musculus GN=Bsg PE=1 SV=2	0	1	0	0	0	0	0	1
sp|O88737|BSN_MOUSE	Bsn	Protein bassoon OS=Mus musculus GN=Bsn PE=1 SV=4	11	32	11	12	5	16	10	24
sp|P98086|C1QA_MOUSE	C1qa	Complement C1q subcomponent subunit A OS=Mus musculus GN=C1qa PE=1 SV=2	0	1	0	1	0	2	0	0
sp|Q02105|C1QC_MOUSE	C1qc	Complement C1q subcomponent subunit C OS=Mus musculus GN=C1qc PE=1 SV=2	3	3	3	3	3	3	0	4
sp|Q8CG16|C1RA_MOUSE	C1ra	Complement C1r-A subcomponent OS=Mus musculus GN=C1ra PE=1 SV=1	1	1	1	1	1	1	0	1
sp|P06684|CO5_MOUSE	C5	Complement C5 OS=Mus musculus GN=C5 PE=1 SV=2	4	3	4	4	5	3	3	2
sp|P00920|CAH2_MOUSE	Ca2	Carbonic anhydrase 2 OS=Mus musculus GN=Ca2 PE=1 SV=4	11	9	5	5	4	10	14	8
sp|Q61290|CAC1E_MOUSE	Cacna1e	Voltage-dependent R-type calcium channel subunit alpha-1E OS=Mus musculus GN=Cacna1e PE=1 SV=1	0	0	0	0	0	2	0	0
sp|Q02789|CAC1S_MOUSE	Cacna1s	Voltage-dependent L-type calcium channel subunit alpha-1S OS=Mus musculus GN=Cacna1s PE=1 SV=2	0	2	0	0	0	0	0	0
sp|Q8CC27|CACB2_MOUSE	Cacnb2	Voltage-dependent L-type calcium channel subunit beta-2 OS=Mus musculus GN=Cacnb2 PE=1 SV=1	0	0	0	0	0	1	0	0
sp|Q8R0S4|CACB4_MOUSE	Cacnb4	Voltage-dependent L-type calcium channel subunit beta-4 OS=Mus musculus GN=Cacnb4 PE=1 SV=2	0	0	0	0	12	15	0	0
sp|Q8VHW2|CCG8_MOUSE	Cacng8	Voltage-dependent calcium channel gamma-8 subunit OS=Mus musculus GN=Cacng8 PE=1 SV=1	7	7	6	5	7	5	4	4
sp|Q9CXW3|CYBP_MOUSE	Cacybp	Calcyclin-binding protein OS=Mus musculus GN=Cacybp PE=1 SV=1	0	2	0	0	0	0	4	0
sp|Q8BLQ9|CADM2_MOUSE	Cadm2	Cell adhesion molecule 2 OS=Mus musculus GN=Cadm2 PE=1 SV=2	0	2	0	0	0	0	0	0
sp|Q99N28|CADM3_MOUSE	Cadm3	Cell adhesion molecule 3 OS=Mus musculus GN=Cadm3 PE=1 SV=1	0	3	2	1	3	1	2	4
sp|Q8R464|CADM4_MOUSE	Cadm4	Cell adhesion molecule 4 OS=Mus musculus GN=Cadm4 PE=1 SV=1	0	0	0	0	0	0	1	0
sp|Q80TJ1|CAPS1_MOUSE	Cadps	Calcium-dependent secretion activator 1 OS=Mus musculus GN=Cadps PE=1 SV=3	20	18	12	9	10	19	24	20
sp|Q8BYR5|CAPS2_MOUSE	Cadps2	Calcium-dependent secretion activator 2 OS=Mus musculus GN=Cadps2 PE=1 SV=2	2	4	2	2	1	1	2	3
sp|Q08331|CALB2_MOUSE	Calb2	Calretinin OS=Mus musculus GN=Calb2 PE=1 SV=3	0	0	0	0	0	1	0	1
sp|P0DP27|CALM2_MOUSE	Calm2	Calmodulin-2 OS=Mus musculus GN=Calm2 PE=1 SV=1	1	3	1	0	0	6	3	4
sp|Q9D6P8|CALL3_MOUSE	Calml3	Calmodulin-like protein 3 OS=Mus musculus GN=Calml3 PE=2 SV=1	0	2	1	0	0	2	2	2
sp|P14211|CALR_MOUSE	Calr	Calreticulin OS=Mus musculus GN=Calr PE=1 SV=1	5	7	0	3	0	7	9	7
sp|Q8BW96|KCC1D_MOUSE	Camk1d	Calcium/calmodulin-dependent protein kinase type 1D OS=Mus musculus GN=Camk1d PE=1 SV=2	0	1	0	0	0	0	0	0
sp|P11798|KCC2A_MOUSE	Camk2a	Calcium/calmodulin-dependent protein kinase type II subunit alpha OS=Mus musculus GN=Camk2a PE=1 SV=2	19	19	17	13	18	19	18	16
sp|P28652|KCC2B_MOUSE	Camk2b	Calcium/calmodulin-dependent protein kinase type II subunit beta OS=Mus musculus GN=Camk2b PE=1 SV=2	10	12	10	7	7	11	14	8
sp|Q6PHZ2|KCC2D_MOUSE	Camk2d	Calcium/calmodulin-dependent protein kinase type II subunit delta OS=Mus musculus GN=Camk2d PE=1 SV=1	0	0	0	0	0	4	0	4
sp|Q923T9|KCC2G_MOUSE	Camk2g	Calcium/calmodulin-dependent protein kinase type II subunit gamma OS=Mus musculus GN=Camk2g PE=1 SV=1	5	4	3	3	4	6	7	9
sp|Q3UHL1|CAMKV_MOUSE	Camkv	CaM kinase-like vesicle-associated protein OS=Mus musculus GN=Camkv PE=1 SV=2	15	12	10	11	11	11	13	15
sp|Q6ZQ38|CAND1_MOUSE	Cand1	Cullin-associated NEDD8-dissociated protein 1 OS=Mus musculus GN=Cand1 PE=1 SV=2	3	6	4	0	3	4	7	10
sp|P35564|CALX_MOUSE	Canx	Calnexin OS=Mus musculus GN=Canx PE=1 SV=1	0	0	0	0	0	0	2	0
sp|P40124|CAP1_MOUSE	Cap1	Adenylyl cyclase-associated protein 1 OS=Mus musculus GN=Cap1 PE=1 SV=4	13	8	5	8	6	4	10	7
sp|Q9CYT6|CAP2_MOUSE	Cap2	Adenylyl cyclase-associated protein 2 OS=Mus musculus GN=Cap2 PE=1 SV=1	7	4	9	4	0	8	5	9
sp|P47754|CAZA2_MOUSE	Capza2	F-actin-capping protein subunit alpha-2 OS=Mus musculus GN=Capza2 PE=1 SV=3	9	10	10	4	2	8	9	7
sp|P47757|CAPZB_MOUSE	Capzb	F-actin-capping protein subunit beta OS=Mus musculus GN=Capzb PE=1 SV=3	4	4	3	1	2	4	6	4
sp|Q66L44|CBARP_MOUSE	Cbarp	Voltage-dependent calcium channel beta subunit-associated regulatory protein OS=Mus musculus GN=Cbarp PE=1 SV=4	0	0	0	0	0	3	0	0
sp|P48758|CBR1_MOUSE	Cbr1	Carbonyl reductase [NADPH] 1 OS=Mus musculus GN=Cbr1 PE=1 SV=3	0	1	1	1	2	1	1	3
sp|Q8K354|CBR3_MOUSE	Cbr3	Carbonyl reductase [NADPH] 3 OS=Mus musculus GN=Cbr3 PE=1 SV=1	0	0	0	0	0	0	0	2
sp|E9Q1U1|CC171_MOUSE	Ccdc171	Coiled-coil domain-containing protein 171 OS=Mus musculus GN=Ccdc171 PE=2 SV=1	0	0	0	3	0	0	0	0
tr|J3QNE4|J3QNE4_MOUSE	Ccdc180	Coiled-coil domain-containing 180 OS=Mus musculus GN=Ccdc180 PE=1 SV=1	0	0	0	0	0	0	0	2
sp|P80314|TCPB_MOUSE	Cct2	T-complex protein 1 subunit beta OS=Mus musculus GN=Cct2 PE=1 SV=4	1	0	1	0	0	1	1	1
sp|P80318|TCPG_MOUSE	Cct3	T-complex protein 1 subunit gamma OS=Mus musculus GN=Cct3 PE=1 SV=1	0	0	0	0	0	2	0	3
sp|P80315|TCPD_MOUSE	Cct4	T-complex protein 1 subunit delta OS=Mus musculus GN=Cct4 PE=1 SV=3	2	2	0	3	0	2	6	6
sp|P80316|TCPE_MOUSE	Cct5	T-complex protein 1 subunit epsilon OS=Mus musculus GN=Cct5 PE=1 SV=1	0	2	0	0	0	0	1	1
sp|P80317|TCPZ_MOUSE	Cct6a	T-complex protein 1 subunit zeta OS=Mus musculus GN=Cct6a PE=1 SV=3	3	4	0	2	0	2	3	4
sp|Q61390|TCPW_MOUSE	Cct6b	T-complex protein 1 subunit zeta-2 OS=Mus musculus GN=Cct6b PE=1 SV=4	1	0	0	0	0	1	3	0
sp|P80313|TCPH_MOUSE	Cct7	T-complex protein 1 subunit eta OS=Mus musculus GN=Cct7 PE=1 SV=1	5	6	3	2	3	5	6	4
sp|P42932|TCPQ_MOUSE	Cct8	T-complex protein 1 subunit theta OS=Mus musculus GN=Cct8 PE=1 SV=3	3	7	3	2	3	4	9	8
sp|O54901|OX2G_MOUSE	Cd200	OX-2 membrane glycoprotein OS=Mus musculus GN=Cd200 PE=1 SV=1	0	2	0	0	0	0	0	0
sp|Q61735|CD47_MOUSE	Cd47	Leukocyte surface antigen CD47 OS=Mus musculus GN=Cd47 PE=1 SV=2	4	3	2	3	3	4	4	3
sp|P35762|CD81_MOUSE	Cd81	CD81 antigen OS=Mus musculus GN=Cd81 PE=1 SV=2	0	0	0	0	0	0	1	0
sp|P60766|CDC42_MOUSE	Cdc42	Cell division control protein 42 homolog OS=Mus musculus GN=Cdc42 PE=1 SV=2	0	0	1	0	2	0	0	3
sp|Q8VDP6|CDIPT_MOUSE	Cdipt	CDP-diacylglycerol--inositol 3-phosphatidyltransferase OS=Mus musculus GN=Cdipt PE=1 SV=1	2	1	1	0	0	1	2	0
sp|P49615|CDK5_MOUSE	Cdk5	Cyclin-dependent-like kinase 5 OS=Mus musculus GN=Cdk5 PE=1 SV=1	4	3	4	3	2	6	4	3
sp|P98191|CDS1_MOUSE	Cds1	Phosphatidate cytidylyltransferase 1 OS=Mus musculus GN=Cds1 PE=1 SV=2	0	0	0	0	0	1	0	0
sp|Q99L43|CDS2_MOUSE	Cds2	Phosphatidate cytidylyltransferase 2 OS=Mus musculus GN=Cds2 PE=1 SV=1	6	5	6	4	2	3	6	4
sp|Q9JKC6|CEND_MOUSE	Cend1	Cell cycle exit and neuronal differentiation protein 1 OS=Mus musculus GN=Cend1 PE=1 SV=1	3	1	0	2	0	0	2	2
sp|Q9CXS4|CENPV_MOUSE	Cenpv	Centromere protein V OS=Mus musculus GN=Cenpv PE=1 SV=2	3	2	1	0	1	0	0	0
sp|P18760|COF1_MOUSE	Cfl1	Cofilin-1 OS=Mus musculus GN=Cfl1 PE=1 SV=3	6	3	4	5	3	4	5	4
sp|P45591|COF2_MOUSE	Cfl2	Cofilin-2 OS=Mus musculus GN=Cfl2 PE=1 SV=1	2	2	2	2	2	3	3	3
sp|Q9Z265|CHK2_MOUSE	Chek2	Serine/threonine-protein kinase Chk2 OS=Mus musculus GN=Chek2 PE=1 SV=1	0	1	0	0	0	0	0	0
sp|P32211|ACM4_MOUSE	Chrm4	Muscarinic acetylcholine receptor M4 OS=Mus musculus GN=Chrm4 PE=2 SV=1	1	3	2	0	2	0	0	0
sp|Q91WS0|CISD1_MOUSE	Cisd1	CDGSH iron-sulfur domain-containing protein 1 OS=Mus musculus GN=Cisd1 PE=1 SV=1	2	3	4	2	3	4	6	3
sp|A2AGT5|CKAP5_MOUSE	Ckap5	Cytoskeleton-associated protein 5 OS=Mus musculus GN=Ckap5 PE=1 SV=1	0	1	0	0	0	0	0	1
sp|Q04447|KCRB_MOUSE	Ckb	Creatine kinase B-type OS=Mus musculus GN=Ckb PE=1 SV=1	23	32	20	15	17	20	26	22
sp|P30275|KCRU_MOUSE	Ckmt1	Creatine kinase U-type, mitochondrial OS=Mus musculus GN=Ckmt1 PE=1 SV=1	6	6	6	5	3	5	4	8
sp|Q60771|CLD11_MOUSE	Cldn11	Claudin-11 OS=Mus musculus GN=Cldn11 PE=1 SV=1	4	7	4	6	4	4	5	7
sp|Q9QYB1|CLIC4_MOUSE	Clic4	Chloride intracellular channel protein 4 OS=Mus musculus GN=Clic4 PE=1 SV=3	2	3	1	0	0	1	3	0
sp|O88696|CLPP_MOUSE	Clpp	ATP-dependent Clp protease proteolytic subunit, mitochondrial OS=Mus musculus GN=Clpp PE=1 SV=1	1	1	2	0	0	1	2	1
sp|Q8VBZ3|CLPT1_MOUSE	Clptm1	Cleft lip and palate transmembrane protein 1 homolog OS=Mus musculus GN=Clptm1 PE=1 SV=1	3	0	3	0	0	2	3	0
sp|Q68FD5|CLH1_MOUSE	Cltc	Clathrin heavy chain 1 OS=Mus musculus GN=Cltc PE=1 SV=3	60	68	66	61	66	71	63	68
sp|Q99KK2|NEUA_MOUSE	Cmas	N-acylneuraminate cytidylyltransferase OS=Mus musculus GN=Cmas PE=1 SV=2	0	2	0	0	0	0	0	2
sp|Q9DBP5|KCY_MOUSE	Cmpk1	UMP-CMP kinase OS=Mus musculus GN=Cmpk1 PE=1 SV=1	1	0	3	1	0	0	3	0
sp|Q9D6G9|CKLF5_MOUSE	Cmtm5	CKLF-like MARVEL transmembrane domain-containing protein 5 OS=Mus musculus GN=Cmtm5 PE=1 SV=1	1	2	0	0	0	1	2	1
sp|Q9D1A2|CNDP2_MOUSE	Cndp2	Cytosolic non-specific dipeptidase OS=Mus musculus GN=Cndp2 PE=1 SV=1	0	3	0	0	0	1	0	1
sp|P16330|CN37_MOUSE	Cnp	2',3'-cyclic-nucleotide 3'-phosphodiesterase OS=Mus musculus GN=Cnp PE=1 SV=3	31	36	32	27	29	34	35	36
sp|P47746|CNR1_MOUSE	Cnr1	Cannabinoid receptor 1 OS=Mus musculus GN=Cnr1 PE=1 SV=1	2	0	0	0	0	0	1	1
sp|Q5M8N0|CNRP1_MOUSE	Cnrip1	CB1 cannabinoid receptor-interacting protein 1 OS=Mus musculus GN=Cnrip1 PE=1 SV=1	2	3	2	1	1	1	2	2
sp|P12960|CNTN1_MOUSE	Cntn1	Contactin-1 OS=Mus musculus GN=Cntn1 PE=1 SV=1	23	26	21	18	16	26	23	35
sp|O54991|CNTP1_MOUSE	Cntnap1	Contactin-associated protein 1 OS=Mus musculus GN=Cntnap1 PE=1 SV=2	3	5	4	3	0	3	3	4
sp|Q9CPW0|CNTP2_MOUSE	Cntnap2	Contactin-associated protein-like 2 OS=Mus musculus GN=Cntnap2 PE=1 SV=2	1	4	0	0	0	2	0	3
sp|Q0VF58|COJA1_MOUSE	Col19a1	Collagen alpha-1(XIX) chain OS=Mus musculus GN=Col19a1 PE=2 SV=2	0	1	0	0	0	0	3	1
sp|Q8CIE6|COPA_MOUSE	Copa	Coatomer subunit alpha OS=Mus musculus GN=Copa PE=1 SV=2	0	2	1	0	0	1	2	3
sp|O55029|COPB2_MOUSE	Copb2	Coatomer subunit beta' OS=Mus musculus GN=Copb2 PE=1 SV=2	1	2	0	2	0	3	1	1
sp|O88543|CSN3_MOUSE	Cops3	COP9 signalosome complex subunit 3 OS=Mus musculus GN=Cops3 PE=1 SV=3	2	2	0	1	0	1	1	3
sp|O35864|CSN5_MOUSE	Cops5	COP9 signalosome complex subunit 5 OS=Mus musculus GN=Cops5 PE=1 SV=3	0	2	2	2	0	0	2	2
sp|O89053|COR1A_MOUSE	Coro1a	Coronin-1A OS=Mus musculus GN=Coro1a PE=1 SV=5	6	5	4	5	4	4	7	7
sp|Q9WUM3|COR1B_MOUSE	Coro1b	Coronin-1B OS=Mus musculus GN=Coro1b PE=1 SV=1	0	2	2	3	0	1	0	5
sp|Q9WUM4|COR1C_MOUSE	Coro1c	Coronin-1C OS=Mus musculus GN=Coro1c PE=1 SV=2	6	3	3	3	2	3	2	7
sp|Q8BH44|COR2B_MOUSE	Coro2b	Coronin-2B OS=Mus musculus GN=Coro2b PE=1 SV=2	0	0	1	0	1	1	0	0
sp|Q9CQI6|COTL1_MOUSE	Cotl1	Coactosin-like protein OS=Mus musculus GN=Cotl1 PE=1 SV=3	0	3	0	0	0	1	3	3
sp|P19783|COX41_MOUSE	Cox4i1	Cytochrome c oxidase subunit 4 isoform 1, mitochondrial OS=Mus musculus GN=Cox4i1 PE=1 SV=2	0	2	0	0	0	4	1	4
sp|P12787|COX5A_MOUSE	Cox5a	Cytochrome c oxidase subunit 5A, mitochondrial OS=Mus musculus GN=Cox5a PE=1 SV=2	0	0	0	0	0	3	0	0
sp|P19536|COX5B_MOUSE	Cox5b	Cytochrome c oxidase subunit 5B, mitochondrial OS=Mus musculus GN=Cox5b PE=1 SV=1	2	0	1	0	1	1	1	1
sp|P48771|CX7A2_MOUSE	Cox7a2	Cytochrome c oxidase subunit 7A2, mitochondrial OS=Mus musculus GN=Cox7a2 PE=1 SV=2	1	1	0	0	1	2	1	1
sp|Q61387|COX7R_MOUSE	Cox7a2l	Cytochrome c oxidase subunit 7A-related protein, mitochondrial OS=Mus musculus GN=Cox7a2l PE=1 SV=1	0	0	0	0	0	0	0	1
sp|Q8C166|CPNE1_MOUSE	Cpne1	Copine-1 OS=Mus musculus GN=Cpne1 PE=1 SV=1	0	1	0	0	0	0	0	0
sp|Q8BLR2|CPNE4_MOUSE	Cpne4	Copine-4 OS=Mus musculus GN=Cpne4 PE=1 SV=1	0	1	0	0	0	0	0	1
sp|Q8JZW4|CPNE5_MOUSE	Cpne5	Copine-5 OS=Mus musculus GN=Cpne5 PE=1 SV=1	0	0	0	0	0	0	0	1
sp|Q9Z140|CPNE6_MOUSE	Cpne6	Copine-6 OS=Mus musculus GN=Cpne6 PE=1 SV=1	5	6	2	1	0	1	4	4
sp|Q0VE82|CPNE7_MOUSE	Cpne7	Copine-7 OS=Mus musculus GN=Cpne7 PE=1 SV=1	0	0	0	0	0	0	0	1
sp|Q9DC53|CPNE8_MOUSE	Cpne8	Copine-8 OS=Mus musculus GN=Cpne8 PE=2 SV=3	0	0	0	0	0	0	0	2
sp|Q9DCT8|CRIP2_MOUSE	Crip2	Cysteine-rich protein 2 OS=Mus musculus GN=Crip2 PE=1 SV=1	1	1	3	1	2	2	2	2
sp|P97427|DPYL1_MOUSE	Crmp1	Dihydropyrimidinase-related protein 1 OS=Mus musculus GN=Crmp1 PE=1 SV=1	17	20	11	13	10	20	29	27
sp|O54983|CRYM_MOUSE	Crym	Ketimine reductase mu-crystallin OS=Mus musculus GN=Crym PE=1 SV=1	8	17	11	8	7	15	14	13
sp|Q9CZU6|CISY_MOUSE	Cs	Citrate synthase, mitochondrial OS=Mus musculus GN=Cs PE=1 SV=1	1	4	3	5	2	6	0	7
sp|Q91W50|CSDE1_MOUSE	Csde1	Cold shock domain-containing protein E1 OS=Mus musculus GN=Csde1 PE=1 SV=1	0	1	0	0	0	0	0	0
sp|P97315|CSRP1_MOUSE	Csrp1	Cysteine and glycine-rich protein 1 OS=Mus musculus GN=Csrp1 PE=1 SV=3	0	2	2	0	2	0	3	0
sp|P21460|CYTC_MOUSE	Cst3	Cystatin-C OS=Mus musculus GN=Cst3 PE=1 SV=2	1	1	0	0	0	0	1	0
sp|O88712|CTBP1_MOUSE	Ctbp1	C-terminal-binding protein 1 OS=Mus musculus GN=Ctbp1 PE=1 SV=2	1	2	3	2	0	2	4	2
sp|Q02248|CTNB1_MOUSE	Ctnnb1	Catenin beta-1 OS=Mus musculus GN=Ctnnb1 PE=1 SV=1	7	12	6	4	4	6	9	7
sp|P18242|CATD_MOUSE	Ctsd	Cathepsin D OS=Mus musculus GN=Ctsd PE=1 SV=1	1	1	2	1	0	1	2	2
sp|Q60598|SRC8_MOUSE	Cttn	Src substrate cortactin OS=Mus musculus GN=Cttn PE=1 SV=2	3	0	0	3	0	3	0	3
sp|Q9WTX6|CUL1_MOUSE	Cul1	Cullin-1 OS=Mus musculus GN=Cul1 PE=1 SV=1	0	1	0	0	0	0	0	0
sp|Q9D4H8|CUL2_MOUSE	Cul2	Cullin-2 OS=Mus musculus GN=Cul2 PE=1 SV=2	2	3	0	2	2	1	1	0
sp|Q9JLV5|CUL3_MOUSE	Cul3	Cullin-3 OS=Mus musculus GN=Cul3 PE=1 SV=1	0	3	0	1	0	0	2	0
sp|Q8VE73|CUL7_MOUSE	Cul7	Cullin-7 OS=Mus musculus GN=Cul7 PE=1 SV=2	2	0	0	0	0	0	0	0
sp|Q9CQX2|CYB5B_MOUSE	Cyb5b	Cytochrome b5 type B OS=Mus musculus GN=Cyb5b PE=1 SV=1	2	2	1	2	0	4	0	3
sp|Q9DB73|NB5R1_MOUSE	Cyb5r1	NADH-cytochrome b5 reductase 1 OS=Mus musculus GN=Cyb5r1 PE=1 SV=1	1	2	0	0	0	2	2	0
sp|Q9DCN2|NB5R3_MOUSE	Cyb5r3	NADH-cytochrome b5 reductase 3 OS=Mus musculus GN=Cyb5r3 PE=1 SV=3	2	3	2	1	1	1	3	1
sp|Q9D0M3|CY1_MOUSE	Cyc1	Cytochrome c1, heme protein, mitochondrial OS=Mus musculus GN=Cyc1 PE=1 SV=1	2	6	5	4	4	7	7	5
sp|P62897|CYC_MOUSE	Cycs	Cytochrome c, somatic OS=Mus musculus GN=Cycs PE=1 SV=2	6	6	4	4	4	5	4	5
sp|Q7TMB8|CYFP1_MOUSE	Cyfip1	Cytoplasmic FMR1-interacting protein 1 OS=Mus musculus GN=Cyfip1 PE=1 SV=1	3	2	2	1	1	1	1	0
sp|Q5SQX6|CYFP2_MOUSE	Cyfip2	Cytoplasmic FMR1-interacting protein 2 OS=Mus musculus GN=Cyfip2 PE=1 SV=2	14	17	11	8	6	12	9	17
sp|Q80TQ2|CYLD_MOUSE	Cyld	Ubiquitin carboxyl-terminal hydrolase CYLD OS=Mus musculus GN=Cyld PE=1 SV=2	0	1	0	0	0	0	0	0
sp|Q9WVK8|CP46A_MOUSE	Cyp46a1	Cholesterol 24-hydroxylase OS=Mus musculus GN=Cyp46a1 PE=1 SV=1	1	2	2	1	2	1	2	4
tr|Q3V1F1|Q3V1F1_MOUSE	Cyp4f37	Cytochrome P450, family 4, subfamily f, polypeptide 37 OS=Mus musculus GN=Cyp4f37 PE=1 SV=1	0	0	0	1	0	0	0	0
sp|Q9D172|ES1_MOUSE	D10Jhu81e	ES1 protein homolog, mitochondrial OS=Mus musculus GN=D10Jhu81e PE=1 SV=1	4	5	5	5	3	7	4	7
sp|P61804|DAD1_MOUSE	Dad1	Dolichyl-diphosphooligosaccharide--protein glycosyltransferase subunit DAD1 OS=Mus musculus GN=Dad1 PE=1 SV=3	1	2	1	0	0	0	1	1
sp|Q922B2|SYDC_MOUSE	Dars	Aspartate--tRNA ligase, cytoplasmic OS=Mus musculus GN=Dars PE=1 SV=2	2	3	4	2	0	2	4	1
sp|Q9JLM8|DCLK1_MOUSE	Dclk1	Serine/threonine-protein kinase DCLK1 OS=Mus musculus GN=Dclk1 PE=1 SV=1	2	3	1	3	1	1	3	5
sp|Q6PGN3|DCLK2_MOUSE	Dclk2	Serine/threonine-protein kinase DCLK2 OS=Mus musculus GN=Dclk2 PE=1 SV=1	0	1	1	0	0	0	0	0
sp|O08788|DCTN1_MOUSE	Dctn1	Dynactin subunit 1 OS=Mus musculus GN=Dctn1 PE=1 SV=3	0	4	1	0	0	0	0	4
sp|Q8CBY8|DCTN4_MOUSE	Dctn4	Dynactin subunit 4 OS=Mus musculus GN=Dctn4 PE=1 SV=1	1	2	2	1	0	1	2	2
sp|Q9QZB9|DCTN5_MOUSE	Dctn5	Dynactin subunit 5 OS=Mus musculus GN=Dctn5 PE=1 SV=1	0	1	0	0	0	0	2	0
sp|Q9CWS0|DDAH1_MOUSE	Ddah1	N(G),N(G)-dimethylarginine dimethylaminohydrolase 1 OS=Mus musculus GN=Ddah1 PE=1 SV=3	1	1	0	0	0	0	1	1
sp|Q3U1J4|DDB1_MOUSE	Ddb1	DNA damage-binding protein 1 OS=Mus musculus GN=Ddb1 PE=1 SV=2	0	2	1	1	0	3	2	2
sp|O88533|DDC_MOUSE	Ddc	Aromatic-L-amino-acid decarboxylase OS=Mus musculus GN=Ddc PE=1 SV=1	1	1	2	0	0	1	0	1
sp|A2ADY9|DDI2_MOUSE	Ddi2	Protein DDI1 homolog 2 OS=Mus musculus GN=Ddi2 PE=1 SV=1	0	2	0	0	0	0	0	0
sp|O54734|OST48_MOUSE	Ddost	Dolichyl-diphosphooligosaccharide--protein glycosyltransferase 48 kDa subunit OS=Mus musculus GN=Ddost PE=1 SV=2	1	2	1	0	0	0	1	1
sp|O35215|DOPD_MOUSE	Ddt	D-dopachrome decarboxylase OS=Mus musculus GN=Ddt PE=1 SV=3	0	2	0	0	0	1	1	0
sp|Q91VR5|DDX1_MOUSE	Ddx1	ATP-dependent RNA helicase DDX1 OS=Mus musculus GN=Ddx1 PE=1 SV=1	0	0	0	0	0	2	0	2
sp|Q61655|DD19A_MOUSE	Ddx19a	ATP-dependent RNA helicase DDX19A OS=Mus musculus GN=Ddx19a PE=1 SV=2	2	2	1	0	1	1	1	2
sp|Q8VDW0|DX39A_MOUSE	Ddx39a	ATP-dependent RNA helicase DDX39A OS=Mus musculus GN=Ddx39a PE=1 SV=1	2	0	0	2	1	2	2	2
sp|Q9Z1N5|DX39B_MOUSE	Ddx39b	Spliceosome RNA helicase Ddx39b OS=Mus musculus GN=Ddx39b PE=1 SV=1	3	0	2	0	0	0	1	0
sp|Q61656|DDX5_MOUSE	Ddx5	Probable ATP-dependent RNA helicase DDX5 OS=Mus musculus GN=Ddx5 PE=1 SV=2	0	0	0	0	0	0	1	0
sp|P54823|DDX6_MOUSE	Ddx6	Probable ATP-dependent RNA helicase DDX6 OS=Mus musculus GN=Ddx6 PE=1 SV=1	2	3	0	0	0	2	0	3
sp|Q9CQ62|DECR_MOUSE	Decr1	2,4-dienoyl-CoA reductase, mitochondrial OS=Mus musculus GN=Decr1 PE=1 SV=1	0	1	0	0	0	0	1	0
sp|Q6NS52|DGKB_MOUSE	Dgkb	Diacylglycerol kinase beta OS=Mus musculus GN=Dgkb PE=1 SV=2	0	0	0	1	0	1	0	5
sp|Q9R1C6|DGKE_MOUSE	Dgke	Diacylglycerol kinase epsilon OS=Mus musculus GN=Dgke PE=1 SV=1	0	0	0	1	0	1	0	1
tr|A0JP53|A0JP53_MOUSE	Dgkh	Diacylglycerol kinase OS=Mus musculus GN=Dgkh PE=2 SV=1	0	0	0	0	0	0	0	1
tr|D3Z2W1|D3Z2W1_MOUSE	Dgki	Diacylglycerol kinase OS=Mus musculus GN=Dgki PE=1 SV=1	0	0	0	0	0	0	1	0
sp|Q80UP3|DGKZ_MOUSE	Dgkz	Diacylglycerol kinase zeta OS=Mus musculus GN=Dgkz PE=1 SV=2	1	0	0	0	0	0	0	2
sp|Q99L04|DHRS1_MOUSE	Dhrs1	Dehydrogenase/reductase SDR family member 1 OS=Mus musculus GN=Dhrs1 PE=1 SV=1	1	0	0	1	0	0	1	1
sp|O35286|DHX15_MOUSE	Dhx15	Pre-mRNA-splicing factor ATP-dependent RNA helicase DHX15 OS=Mus musculus GN=Dhx15 PE=1 SV=2	1	1	1	0	0	1	1	1
sp|O70133|DHX9_MOUSE	Dhx9	ATP-dependent RNA helicase A OS=Mus musculus GN=Dhx9 PE=1 SV=2	0	0	0	0	1	2	0	0
sp|Q91Z61|DIRA1_MOUSE	Diras1	GTP-binding protein Di-Ras1 OS=Mus musculus GN=Diras1 PE=1 SV=1	2	2	2	0	0	0	0	0
sp|Q5PR73|DIRA2_MOUSE	Diras2	GTP-binding protein Di-Ras2 OS=Mus musculus GN=Diras2 PE=1 SV=1	2	3	3	4	4	4	5	4
sp|Q8BMF4|ODP2_MOUSE	Dlat	Dihydrolipoyllysine-residue acetyltransferase component of pyruvate dehydrogenase complex, mitochondrial OS=Mus musculus GN=Dlat PE=1 SV=2	1	4	0	2	0	5	1	10
sp|O08749|DLDH_MOUSE	Dld	Dihydrolipoyl dehydrogenase, mitochondrial OS=Mus musculus GN=Dld PE=1 SV=2	5	6	7	4	4	7	10	11
sp|Q91XM9|DLG2_MOUSE	Dlg2	Disks large homolog 2 OS=Mus musculus GN=Dlg2 PE=1 SV=2	0	0	0	0	0	1	0	0
sp|Q62108|DLG4_MOUSE	Dlg4	Disks large homolog 4 OS=Mus musculus GN=Dlg4 PE=1 SV=1	0	1	0	0	0	0	0	2
sp|Q9D2G2|ODO2_MOUSE	Dlst	Dihydrolipoyllysine-residue succinyltransferase component of 2-oxoglutarate dehydrogenase complex, mitochondrial OS=Mus musculus GN=Dlst PE=1 SV=1	2	4	1	1	1	6	4	6
sp|Q9WV69|DEMA_MOUSE	Dmtn	Dematin OS=Mus musculus GN=Dmtn PE=1 SV=1	4	3	2	3	2	1	3	2
sp|Q8BPN8|DMXL2_MOUSE	Dmxl2	DmX-like protein 2 OS=Mus musculus GN=Dmxl2 PE=1 SV=3	14	17	13	11	5	18	17	17
sp|Q9QYJ0|DNJA2_MOUSE	Dnaja2	DnaJ homolog subfamily A member 2 OS=Mus musculus GN=Dnaja2 PE=1 SV=1	0	0	0	0	0	0	0	2
sp|P60904|DNJC5_MOUSE	Dnajc5	DnaJ homolog subfamily C member 5 OS=Mus musculus GN=Dnajc5 PE=1 SV=1	0	3	0	0	0	1	0	0
sp|Q80TZ3|AUXI_MOUSE	Dnajc6	Putative tyrosine-protein phosphatase auxilin OS=Mus musculus GN=Dnajc6 PE=1 SV=2	4	7	3	4	2	5	3	6
tr|A0A0J9YUN4|A0A0J9YUN4_MOUSE	Dnm1	Dynamin-1 OS=Mus musculus GN=Dnm1 PE=1 SV=1	29	31	5	21	22	26	37	34
sp|Q8K1M6|DNM1L_MOUSE	Dnm1l	Dynamin-1-like protein OS=Mus musculus GN=Dnm1l PE=1 SV=2	0	1	0	1	0	1	0	1
sp|Q8BZ98|DYN3_MOUSE	Dnm3	Dynamin-3 OS=Mus musculus GN=Dnm3 PE=1 SV=1	8	10	4	6	4	9	16	20
sp|Q6NXK7|DPP10_MOUSE	Dpp10	Inactive dipeptidyl peptidase 10 OS=Mus musculus GN=Dpp10 PE=1 SV=1	2	5	3	3	0	1	5	5
sp|Q9Z218|DPP6_MOUSE	Dpp6	Dipeptidyl aminopeptidase-like protein 6 OS=Mus musculus GN=Dpp6 PE=1 SV=1	1	9	4	2	2	10	12	10
sp|O08553|DPYL2_MOUSE	Dpysl2	Dihydropyrimidinase-related protein 2 OS=Mus musculus GN=Dpysl2 PE=1 SV=2	33	30	20	19	20	26	27	23
sp|Q62188|DPYL3_MOUSE	Dpysl3	Dihydropyrimidinase-related protein 3 OS=Mus musculus GN=Dpysl3 PE=1 SV=1	7	11	4	3	2	8	9	9
sp|O35098|DPYL4_MOUSE	Dpysl4	Dihydropyrimidinase-related protein 4 OS=Mus musculus GN=Dpysl4 PE=1 SV=1	0	3	1	1	3	3	4	7
sp|Q9EQF6|DPYL5_MOUSE	Dpysl5	Dihydropyrimidinase-related protein 5 OS=Mus musculus GN=Dpysl5 PE=1 SV=1	9	8	5	5	2	4	13	7
sp|Q9QXB9|DRG2_MOUSE	Drg2	Developmentally-regulated GTP-binding protein 2 OS=Mus musculus GN=Drg2 PE=1 SV=1	0	2	0	1	1	1	0	0
sp|O35075|DSCR3_MOUSE	Dscr3	Down syndrome critical region protein 3 homolog OS=Mus musculus GN=Dscr3 PE=1 SV=1	0	0	0	0	0	0	0	2
sp|Q9R0P5|DEST_MOUSE	Dstn	Destrin OS=Mus musculus GN=Dstn PE=1 SV=3	3	3	0	0	0	0	2	2
sp|Q9DD18|DTD1_MOUSE	Dtd1	D-tyrosyl-tRNA(Tyr) deacylase 1 OS=Mus musculus GN=Dtd1 PE=1 SV=2	2	2	2	1	1	2	1	1
sp|Q9D2N4|DTNA_MOUSE	Dtna	Dystrobrevin alpha OS=Mus musculus GN=Dtna PE=1 SV=2	0	0	0	1	0	0	0	0
sp|Q9JHU4|DYHC1_MOUSE	Dync1h1	Cytoplasmic dynein 1 heavy chain 1 OS=Mus musculus GN=Dync1h1 PE=1 SV=2	69	85	58	58	41	77	45	97
sp|O88485|DC1I1_MOUSE	Dync1i1	Cytoplasmic dynein 1 intermediate chain 1 OS=Mus musculus GN=Dync1i1 PE=1 SV=2	3	2	2	2	0	1	3	4
sp|O88487|DC1I2_MOUSE	Dync1i2	Cytoplasmic dynein 1 intermediate chain 2 OS=Mus musculus GN=Dync1i2 PE=1 SV=1	5	6	6	4	3	5	4	5
sp|Q8R1Q8|DC1L1_MOUSE	Dync1li1	Cytoplasmic dynein 1 light intermediate chain 1 OS=Mus musculus GN=Dync1li1 PE=1 SV=1	0	1	0	0	0	0	1	0
sp|Q6PDL0|DC1L2_MOUSE	Dync1li2	Cytoplasmic dynein 1 light intermediate chain 2 OS=Mus musculus GN=Dync1li2 PE=1 SV=2	4	4	0	0	0	2	4	2
sp|P63168|DYL1_MOUSE	Dynll1	Dynein light chain 1, cytoplasmic OS=Mus musculus GN=Dynll1 PE=1 SV=1	2	1	1	1	1	1	1	1
sp|Q8BH95|ECHM_MOUSE	Echs1	Enoyl-CoA hydratase, mitochondrial OS=Mus musculus GN=Echs1 PE=1 SV=1	0	0	0	0	0	1	0	1
sp|P42125|ECI1_MOUSE	Eci1	Enoyl-CoA delta isomerase 1, mitochondrial OS=Mus musculus GN=Eci1 PE=1 SV=2	1	0	0	0	0	1	2	1
sp|P10126|EF1A1_MOUSE	Eef1a1	Elongation factor 1-alpha 1 OS=Mus musculus GN=Eef1a1 PE=1 SV=3	17	19	19	15	16	17	19	19
sp|P62631|EF1A2_MOUSE	Eef1a2	Elongation factor 1-alpha 2 OS=Mus musculus GN=Eef1a2 PE=1 SV=1	7	6	8	8	6	8	9	13
sp|O70251|EF1B_MOUSE	Eef1b	Elongation factor 1-beta OS=Mus musculus GN=Eef1b PE=1 SV=5	1	0	0	0	0	1	1	1
sp|Q9D8N0|EF1G_MOUSE	Eef1g	Elongation factor 1-gamma OS=Mus musculus GN=Eef1g PE=1 SV=3	0	3	2	0	0	2	2	4
sp|P58252|EF2_MOUSE	Eef2	Elongation factor 2 OS=Mus musculus GN=Eef2 PE=1 SV=2	6	11	4	3	1	5	8	10
sp|Q6ZQ18|EFR3B_MOUSE	Efr3b	Protein EFR3 homolog B OS=Mus musculus GN=Efr3b PE=1 SV=2	0	1	0	0	0	0	0	1
sp|Q9QXY6|EHD3_MOUSE	Ehd3	EH domain-containing protein 3 OS=Mus musculus GN=Ehd3 PE=1 SV=2	0	1	0	0	0	0	0	0
sp|Q6ZWX6|IF2A_MOUSE	Eif2s1	Eukaryotic translation initiation factor 2 subunit 1 OS=Mus musculus GN=Eif2s1 PE=1 SV=3	1	1	1	1	1	1	2	0
sp|Q9Z0N2|IF2H_MOUSE	Eif2s3y	Eukaryotic translation initiation factor 2 subunit 3, Y-linked OS=Mus musculus GN=Eif2s3y PE=1 SV=2	0	0	0	0	0	0	0	1
sp|P60843|IF4A1_MOUSE	Eif4a1	Eukaryotic initiation factor 4A-I OS=Mus musculus GN=Eif4a1 PE=1 SV=1	3	4	2	0	0	0	0	4
sp|P10630|IF4A2_MOUSE	Eif4a2	Eukaryotic initiation factor 4A-II OS=Mus musculus GN=Eif4a2 PE=1 SV=2	6	7	9	4	4	8	9	11
sp|P70372|ELAV1_MOUSE	Elavl1	ELAV-like protein 1 OS=Mus musculus GN=Elavl1 PE=1 SV=2	0	1	0	0	0	0	0	1
sp|Q60900|ELAV3_MOUSE	Elavl3	ELAV-like protein 3 OS=Mus musculus GN=Elavl3 PE=1 SV=1	1	1	0	0	0	0	2	1
sp|Q9CZX0|ELP3_MOUSE	Elp3	Elongator complex protein 3 OS=Mus musculus GN=Elp3 PE=1 SV=1	0	0	0	0	0	0	0	1
sp|Q7TNG5|EMAL2_MOUSE	Eml2	Echinoderm microtubule-associated protein-like 2 OS=Mus musculus GN=Eml2 PE=1 SV=1	0	2	0	0	0	0	0	0
sp|Q8C522|ENDD1_MOUSE	Endod1	Endonuclease domain-containing 1 protein OS=Mus musculus GN=Endod1 PE=1 SV=2	0	0	0	0	0	0	1	1
sp|P17182|ENOA_MOUSE	Eno1	Alpha-enolase OS=Mus musculus GN=Eno1 PE=1 SV=3	23	28	22	15	15	27	32	26
sp|P17183|ENOG_MOUSE	Eno2	Gamma-enolase OS=Mus musculus GN=Eno2 PE=1 SV=2	5	10	9	4	3	11	11	13
sp|Q9Z2H5|E41L1_MOUSE	Epb41l1	Band 4.1-like protein 1 OS=Mus musculus GN=Epb41l1 PE=1 SV=2	11	15	11	10	8	13	18	19
sp|O70318|E41L2_MOUSE	Epb41l2	Band 4.1-like protein 2 OS=Mus musculus GN=Epb41l2 PE=1 SV=2	13	13	15	7	11	13	15	18
sp|Q9WV92|E41L3_MOUSE	Epb41l3	Band 4.1-like protein 3 OS=Mus musculus GN=Epb41l3 PE=1 SV=1	26	28	24	16	13	17	27	29
sp|Q99M71|EPDR1_MOUSE	Epdr1	Mammalian ependymin-related protein 1 OS=Mus musculus GN=Epdr1 PE=1 SV=1	0	1	1	0	0	0	0	0
sp|Q03137|EPHA4_MOUSE	Epha4	Ephrin type-A receptor 4 OS=Mus musculus GN=Epha4 PE=1 SV=2	2	0	0	0	0	1	1	2
sp|Q8CGC7|SYEP_MOUSE	Eprs	Bifunctional glutamate/proline--tRNA ligase OS=Mus musculus GN=Eprs PE=1 SV=4	1	3	1	1	0	3	1	5
sp|Q6PH08|ERC2_MOUSE	Erc2	ERC protein 2 OS=Mus musculus GN=Erc2 PE=1 SV=2	0	2	25	39	0	1	0	0
sp|Q8BFZ9|ERLN2_MOUSE	Erlin2	Erlin-2 OS=Mus musculus GN=Erlin2 PE=1 SV=1	0	0	0	0	0	1	0	0
sp|Q9R0P3|ESTD_MOUSE	Esd	S-formylglutathione hydrolase OS=Mus musculus GN=Esd PE=1 SV=1	0	1	2	0	2	2	3	4
sp|Q99LC5|ETFA_MOUSE	Etfa	Electron transfer flavoprotein subunit alpha, mitochondrial OS=Mus musculus GN=Etfa PE=1 SV=2	1	0	0	0	0	1	2	2
sp|Q9DCW4|ETFB_MOUSE	Etfb	Electron transfer flavoprotein subunit beta OS=Mus musculus GN=Etfb PE=1 SV=3	1	1	0	0	0	0	3	1
sp|Q921G7|ETFD_MOUSE	Etfdh	Electron transfer flavoprotein-ubiquinone oxidoreductase, mitochondrial OS=Mus musculus GN=Etfdh PE=1 SV=1	3	5	2	0	0	2	1	2
sp|P70429|EVL_MOUSE	Evl	Ena/VASP-like protein OS=Mus musculus GN=Evl PE=1 SV=2	0	0	0	0	0	0	0	1
sp|O35382|EXOC4_MOUSE	Exoc4	Exocyst complex component 4 OS=Mus musculus GN=Exoc4 PE=1 SV=2	0	1	0	0	0	0	1	0
sp|P26040|EZRI_MOUSE	Ezr	Ezrin OS=Mus musculus GN=Ezr PE=1 SV=3	0	0	0	1	0	0	0	2
sp|P19221|THRB_MOUSE	F2	Prothrombin OS=Mus musculus GN=F2 PE=1 SV=1	0	0	0	2	0	0	0	0
sp|P11404|FABPH_MOUSE	Fabp3	Fatty acid-binding protein, heart OS=Mus musculus GN=Fabp3 PE=1 SV=5	0	1	0	0	0	0	2	0
sp|Q05816|FABP5_MOUSE	Fabp5	Fatty acid-binding protein, epidermal OS=Mus musculus GN=Fabp5 PE=1 SV=3	1	0	1	0	0	1	3	0
sp|P51880|FABP7_MOUSE	Fabp7	Fatty acid-binding protein, brain OS=Mus musculus GN=Fabp7 PE=1 SV=2	1	0	1	0	0	0	1	1
sp|P35505|FAAA_MOUSE	Fah	Fumarylacetoacetase OS=Mus musculus GN=Fah PE=1 SV=2	3	0	0	0	0	0	2	1
sp|Q3TC72|FAHD2_MOUSE	Fahd2	Fumarylacetoacetate hydrolase domain-containing protein 2A OS=Mus musculus GN=Fahd2 PE=1 SV=1	0	2	0	0	0	0	0	1
sp|Q8K097|LFG2_MOUSE	Faim2	Protein lifeguard 2 OS=Mus musculus GN=Faim2 PE=2 SV=1	0	1	0	0	0	0	0	0
sp|Q6A0A9|F120A_MOUSE	FAM120A	Constitutive coactivator of PPAR-gamma-like protein 1 OS=Mus musculus GN=FAM120A PE=1 SV=2	1	1	0	0	1	0	2	2
sp|Q9CYH2|F213A_MOUSE	Fam213a	Redox-regulatory protein FAM213A OS=Mus musculus GN=Fam213a PE=1 SV=2	2	4	4	3	2	2	3	5
sp|Q8BHZ0|FA49A_MOUSE	Fam49a	Protein FAM49A OS=Mus musculus GN=Fam49a PE=1 SV=1	3	3	3	2	2	2	2	4
sp|Q921M7|FA49B_MOUSE	Fam49b	Protein FAM49B OS=Mus musculus GN=Fam49b PE=1 SV=1	7	7	2	5	4	5	9	7
sp|F8VPU2|FARP1_MOUSE	Farp1	FERM, RhoGEF and pleckstrin domain-containing protein 1 OS=Mus musculus GN=Farp1 PE=1 SV=1	1	2	0	0	0	0	1	0
sp|P19096|FAS_MOUSE	Fasn	Fatty acid synthase OS=Mus musculus GN=Fasn PE=1 SV=2	12	16	12	7	10	14	11	17
sp|A2RT62|FXL16_MOUSE	Fbxl16	F-box/LRR-repeat protein 16 OS=Mus musculus GN=Fbxl16 PE=1 SV=1	3	4	2	2	3	2	5	1
sp|Q9DC63|FBX3_MOUSE	Fbxo3	F-box only protein 3 OS=Mus musculus GN=Fbxo3 PE=1 SV=1	0	1	0	0	0	0	0	0
sp|Q9QZN4|FBX6_MOUSE	Fbxo6	F-box only protein 6 OS=Mus musculus GN=Fbxo6 PE=1 SV=1	0	1	0	0	0	0	0	0
sp|P97807|FUMH_MOUSE	Fh	Fumarate hydratase, mitochondrial OS=Mus musculus GN=Fh PE=1 SV=3	3	5	0	1	0	3	3	6
sp|P97447|FHL1_MOUSE	Fhl1	Four and a half LIM domains protein 1 OS=Mus musculus GN=Fhl1 PE=1 SV=3	1	2	1	1	0	2	1	1
sp|Q9CQ92|FIS1_MOUSE	Fis1	Mitochondrial fission 1 protein OS=Mus musculus GN=Fis1 PE=1 SV=1	1	1	2	1	1	2	1	1
sp|P26883|FKB1A_MOUSE	Fkbp1a	Peptidyl-prolyl cis-trans isomerase FKBP1A OS=Mus musculus GN=Fkbp1a PE=1 SV=2	1	2	1	0	1	1	0	2
sp|P45878|FKBP2_MOUSE	Fkbp2	Peptidyl-prolyl cis-trans isomerase FKBP2 OS=Mus musculus GN=Fkbp2 PE=1 SV=1	0	2	0	0	0	2	2	2
sp|O35465|FKBP8_MOUSE	Fkbp8	Peptidyl-prolyl cis-trans isomerase FKBP8 OS=Mus musculus GN=Fkbp8 PE=1 SV=2	0	0	0	0	1	0	0	1
sp|O08917|FLOT1_MOUSE	Flot1	Flotillin-1 OS=Mus musculus GN=Flot1 PE=1 SV=1	1	0	0	0	0	2	0	0
sp|P11276|FINC_MOUSE	Fn1	Fibronectin OS=Mus musculus GN=Fn1 PE=1 SV=4	0	0	1	0	0	0	0	0
sp|Q61553|FSCN1_MOUSE	Fscn1	Fascin OS=Mus musculus GN=Fscn1 PE=1 SV=4	4	6	6	4	5	3	6	8
sp|Q7TPM6|FSD1_MOUSE	Fsd1	Fibronectin type III and SPRY domain-containing protein 1 OS=Mus musculus GN=Fsd1 PE=1 SV=1	1	1	0	0	0	0	2	1
sp|P09528|FRIH_MOUSE	Fth1	Ferritin heavy chain OS=Mus musculus GN=Fth1 PE=1 SV=2	0	0	0	0	0	0	0	2
sp|Q9D6K8|FUND2_MOUSE	Fundc2	FUN14 domain-containing protein 2 OS=Mus musculus GN=Fundc2 PE=1 SV=1	1	1	0	0	1	1	0	0
sp|Q9D164|FXYD6_MOUSE	Fxyd6	FXYD domain-containing ion transport regulator 6 OS=Mus musculus GN=Fxyd6 PE=1 SV=2	2	0	2	0	0	1	2	0
sp|P59648|FXYD7_MOUSE	Fxyd7	FXYD domain-containing ion transport regulator 7 OS=Mus musculus GN=Fxyd7 PE=3 SV=1	0	0	0	0	0	0	0	1
sp|P70699|LYAG_MOUSE	Gaa	Lysosomal alpha-glucosidase OS=Mus musculus GN=Gaa PE=1 SV=2	0	1	0	0	0	0	0	0
sp|Q9WV18|GABR1_MOUSE	Gabbr1	Gamma-aminobutyric acid type B receptor subunit 1 OS=Mus musculus GN=Gabbr1 PE=1 SV=1	0	2	0	0	0	2	0	3
sp|Q80T41|GABR2_MOUSE	Gabbr2	Gamma-aminobutyric acid type B receptor subunit 2 OS=Mus musculus GN=Gabbr2 PE=1 SV=2	5	4	4	3	1	4	5	4
sp|P62812|GBRA1_MOUSE	Gabra1	Gamma-aminobutyric acid receptor subunit alpha-1 OS=Mus musculus GN=Gabra1 PE=1 SV=1	2	0	0	0	0	0	1	1
sp|P26048|GBRA2_MOUSE	Gabra2	Gamma-aminobutyric acid receptor subunit alpha-2 OS=Mus musculus GN=Gabra2 PE=1 SV=1	1	0	0	0	0	0	0	0
sp|P26049|GBRA3_MOUSE	Gabra3	Gamma-aminobutyric acid receptor subunit alpha-3 OS=Mus musculus GN=Gabra3 PE=1 SV=1	0	0	1	0	0	0	0	0
sp|P63137|GBRB2_MOUSE	Gabrb2	Gamma-aminobutyric acid receptor subunit beta-2 OS=Mus musculus GN=Gabrb2 PE=1 SV=2	1	3	2	1	1	2	1	2
sp|P63080|GBRB3_MOUSE	Gabrb3	Gamma-aminobutyric acid receptor subunit beta-3 OS=Mus musculus GN=Gabrb3 PE=2 SV=1	1	0	1	0	1	0	0	5
sp|P48318|DCE1_MOUSE	Gad1	Glutamate decarboxylase 1 OS=Mus musculus GN=Gad1 PE=1 SV=2	2	2	0	0	0	0	1	6
sp|P48320|DCE2_MOUSE	Gad2	Glutamate decarboxylase 2 OS=Mus musculus GN=Gad2 PE=1 SV=1	0	0	0	0	0	0	3	2
sp|Q8BHN3|GANAB_MOUSE	Ganab	Neutral alpha-glucosidase AB OS=Mus musculus GN=Ganab PE=1 SV=1	0	2	0	0	1	0	0	4
sp|P06837|NEUM_MOUSE	Gap43	Neuromodulin OS=Mus musculus GN=Gap43 PE=1 SV=1	12	10	10	13	9	11	9	10
sp|P16858|G3P_MOUSE	Gapdh	Glyceraldehyde-3-phosphate dehydrogenase OS=Mus musculus GN=Gapdh PE=1 SV=2	38	40	40	40	38	45	44	43
sp|Q8BFQ8|GALD1_MOUSE	Gatd1	Glutamine amidotransferase-like class 1 domain-containing protein 1 OS=Mus musculus GN=Gatd1 PE=1 SV=1	0	0	0	0	0	0	0	1
sp|Q9R111|GUAD_MOUSE	Gda	Guanine deaminase OS=Mus musculus GN=Gda PE=1 SV=1	5	5	2	1	3	4	7	6
sp|O88741|GDAP1_MOUSE	Gdap1	Ganglioside-induced differentiation-associated protein 1 OS=Mus musculus GN=Gdap1 PE=1 SV=1	4	6	3	4	2	6	4	5
sp|Q8VE33|GD1L1_MOUSE	Gdap1l1	Ganglioside-induced differentiation-associated protein 1-like 1 OS=Mus musculus GN=Gdap1l1 PE=1 SV=1	3	4	0	2	1	4	2	1
sp|P50396|GDIA_MOUSE	Gdi1	Rab GDP dissociation inhibitor alpha OS=Mus musculus GN=Gdi1 PE=1 SV=3	43	35	35	23	23	28	41	32
sp|Q61598|GDIB_MOUSE	Gdi2	Rab GDP dissociation inhibitor beta OS=Mus musculus GN=Gdi2 PE=1 SV=1	6	11	7	10	7	10	12	10
sp|Q9CRY7|GDPD1_MOUSE	Gdpd1	Glycerophosphodiester phosphodiesterase domain-containing protein 1 OS=Mus musculus GN=Gdpd1 PE=1 SV=1	1	2	1	0	0	0	1	0
sp|Q9D1H7|GET4_MOUSE	Get4	Golgi to ER traffic protein 4 homolog OS=Mus musculus GN=Get4 PE=1 SV=2	0	0	0	0	0	0	0	1
sp|Q9D7X8|GGCT_MOUSE	Ggct	Gamma-glutamylcyclotransferase OS=Mus musculus GN=Ggct PE=1 SV=1	1	1	1	1	1	1	1	1
sp|Q99JP7|GGT7_MOUSE	Ggt7	Gamma-glutamyltransferase 7 OS=Mus musculus GN=Ggt7 PE=1 SV=2	0	2	0	0	0	0	0	0
sp|Q91VC9|GHITM_MOUSE	Ghitm	Growth hormone-inducible transmembrane protein OS=Mus musculus GN=Ghitm PE=1 SV=1	1	1	1	2	1	1	1	1
sp|Q68FF6|GIT1_MOUSE	Git1	ARF GTPase-activating protein GIT1 OS=Mus musculus GN=Git1 PE=1 SV=1	0	2	0	0	0	0	0	0
sp|P23242|CXA1_MOUSE	Gja1	Gap junction alpha-1 protein OS=Mus musculus GN=Gja1 PE=1 SV=2	8	8	5	8	5	4	7	7
sp|Q921C1|CXG3_MOUSE	Gjc3	Gap junction gamma-3 protein OS=Mus musculus GN=Gjc3 PE=1 SV=2	1	2	0	3	0	1	1	1
sp|Q9CPU0|LGUL_MOUSE	Glo1	Lactoylglutathione lyase OS=Mus musculus GN=Glo1 PE=1 SV=3	0	5	2	1	1	2	2	2
sp|Q9CPV4|GLOD4_MOUSE	Glod4	Glyoxalase domain-containing protein 4 OS=Mus musculus GN=Glod4 PE=1 SV=1	0	1	1	0	1	0	2	0
sp|Q9QUH0|GLRX1_MOUSE	Glrx	Glutaredoxin-1 OS=Mus musculus GN=Glrx PE=1 SV=3	0	0	2	0	0	0	0	0
sp|D3Z7P3|GLSK_MOUSE	Gls	Glutaminase kidney isoform, mitochondrial OS=Mus musculus GN=Gls PE=1 SV=1	6	8	7	6	3	7	11	10
sp|P26443|DHE3_MOUSE	Glud1	Glutamate dehydrogenase 1, mitochondrial OS=Mus musculus GN=Glud1 PE=1 SV=1	19	21	19	11	15	16	22	19
sp|P15105|GLNA_MOUSE	Glul	Glutamine synthetase OS=Mus musculus GN=Glul PE=1 SV=6	10	9	4	4	2	6	11	7
tr|Q8BU52|Q8BU52_MOUSE	Gm7265	Predicted gene, EG639396 OS=Mus musculus GN=Gm7265 PE=2 SV=1	0	0	0	0	0	1	0	0
sp|A2AJA9|CI172_MOUSE	Gm996	Uncharacterized protein C9orf172 homolog OS=Mus musculus GN=Gm996 PE=1 SV=1	0	1	1	1	0	0	0	1
sp|Q9CQI3|GMFB_MOUSE	Gmfb	Glia maturation factor beta OS=Mus musculus GN=Gmfb PE=1 SV=3	2	1	0	0	0	1	1	1
sp|Q3THK7|GUAA_MOUSE	Gmps	GMP synthase [glutamine-hydrolyzing] OS=Mus musculus GN=Gmps PE=1 SV=2	0	0	0	0	0	0	1	1
sp|P21278|GNA11_MOUSE	Gna11	Guanine nucleotide-binding protein subunit alpha-11 OS=Mus musculus GN=Gna11 PE=1 SV=1	2	3	0	1	0	2	2	2
sp|B2RSH2|GNAI1_MOUSE	Gnai1	Guanine nucleotide-binding protein G(i) subunit alpha-1 OS=Mus musculus GN=Gnai1 PE=1 SV=1	7	4	7	3	4	4	6	4
sp|P08752|GNAI2_MOUSE	Gnai2	Guanine nucleotide-binding protein G(i) subunit alpha-2 OS=Mus musculus GN=Gnai2 PE=1 SV=5	6	5	4	3	4	4	5	5
sp|Q9DC51|GNAI3_MOUSE	Gnai3	Guanine nucleotide-binding protein G(k) subunit alpha OS=Mus musculus GN=Gnai3 PE=1 SV=3	2	1	1	0	0	2	2	1
sp|Q8CGK7|GNAL_MOUSE	Gnal	Guanine nucleotide-binding protein G(olf) subunit alpha OS=Mus musculus GN=Gnal PE=1 SV=1	0	3	0	0	2	3	3	1
sp|P18872|GNAO_MOUSE	Gnao1	Guanine nucleotide-binding protein G(o) subunit alpha OS=Mus musculus GN=Gnao1 PE=1 SV=3	16	24	16	17	14	24	25	26
sp|P21279|GNAQ_MOUSE	Gnaq	Guanine nucleotide-binding protein G(q) subunit alpha OS=Mus musculus GN=Gnaq PE=1 SV=4	2	2	1	0	0	1	0	2
sp|Q6R0H7|GNAS1_MOUSE	Gnas	Guanine nucleotide-binding protein G(s) subunit alpha isoforms XLas OS=Mus musculus GN=Gnas PE=1 SV=1	0	3	0	0	0	1	1	1
sp|Q3V3I2|GNAT3_MOUSE	Gnat3	Guanine nucleotide-binding protein G(t) subunit alpha-3 OS=Mus musculus GN=Gnat3 PE=1 SV=2	5	5	0	3	3	5	5	3
sp|O70443|GNAZ_MOUSE	Gnaz	Guanine nucleotide-binding protein G(z) subunit alpha OS=Mus musculus GN=Gnaz PE=1 SV=4	6	7	4	4	2	5	6	8
sp|P62874|GBB1_MOUSE	Gnb1	Guanine nucleotide-binding protein G(I)/G(S)/G(T) subunit beta-1 OS=Mus musculus GN=Gnb1 PE=1 SV=3	4	5	4	5	4	5	5	7
sp|P62881|GNB5_MOUSE	Gnb5	Guanine nucleotide-binding protein subunit beta-5 OS=Mus musculus GN=Gnb5 PE=1 SV=1	3	3	1	0	2	2	2	4
sp|P63213|GBG2_MOUSE	Gng2	Guanine nucleotide-binding protein G(I)/G(S)/G(O) subunit gamma-2 OS=Mus musculus GN=Gng2 PE=1 SV=2	2	3	3	1	1	2	1	0
sp|P63216|GBG3_MOUSE	Gng3	Guanine nucleotide-binding protein G(I)/G(S)/G(O) subunit gamma-3 OS=Mus musculus GN=Gng3 PE=1 SV=1	1	1	1	1	1	1	1	1
sp|P50153|GBG4_MOUSE	Gng4	Guanine nucleotide-binding protein G(I)/G(S)/G(O) subunit gamma-4 OS=Mus musculus GN=Gng4 PE=1 SV=1	0	0	0	0	0	0	0	1
sp|Q61016|GBG7_MOUSE	Gng7	Guanine nucleotide-binding protein G(I)/G(S)/G(O) subunit gamma-7 OS=Mus musculus GN=Gng7 PE=1 SV=2	1	1	1	0	0	1	1	1
sp|P36916|GNL1_MOUSE	Gnl1	Guanine nucleotide-binding protein-like 1 OS=Mus musculus GN=Gnl1 PE=1 SV=4	0	3	0	0	0	0	0	0
sp|O88958|GNPI1_MOUSE	Gnpda1	Glucosamine-6-phosphate isomerase 1 OS=Mus musculus GN=Gnpda1 PE=1 SV=3	0	2	0	0	0	0	0	1
sp|Q9CRC9|GNPI2_MOUSE	Gnpda2	Glucosamine-6-phosphate isomerase 2 OS=Mus musculus GN=Gnpda2 PE=1 SV=1	0	1	0	0	0	1	0	0
sp|P05201|AATC_MOUSE	Got1	Aspartate aminotransferase, cytoplasmic OS=Mus musculus GN=Got1 PE=1 SV=3	9	9	7	6	5	8	15	13
sp|P05202|AATM_MOUSE	Got2	Aspartate aminotransferase, mitochondrial OS=Mus musculus GN=Got2 PE=1 SV=1	11	14	7	8	5	9	13	10
sp|P13707|GPDA_MOUSE	Gpd1	Glycerol-3-phosphate dehydrogenase [NAD(+)], cytoplasmic OS=Mus musculus GN=Gpd1 PE=1 SV=3	2	2	1	0	0	0	3	2
sp|Q3ULJ0|GPD1L_MOUSE	Gpd1l	Glycerol-3-phosphate dehydrogenase 1-like protein OS=Mus musculus GN=Gpd1l PE=1 SV=2	0	2	0	0	0	2	1	1
sp|Q64521|GPDM_MOUSE	Gpd2	Glycerol-3-phosphate dehydrogenase, mitochondrial OS=Mus musculus GN=Gpd2 PE=1 SV=2	6	8	0	1	2	3	5	8
sp|Q8BUV3|GEPH_MOUSE	Gphn	Gephyrin OS=Mus musculus GN=Gphn PE=1 SV=2	5	4	2	0	0	1	1	4
sp|P06745|G6PI_MOUSE	Gpi	Glucose-6-phosphate isomerase OS=Mus musculus GN=Gpi PE=1 SV=4	5	6	3	5	4	5	6	10
tr|B2RXT5|B2RXT5_MOUSE	Gpi1	Glucose-6-phosphate isomerase OS=Mus musculus GN=Gpi1 PE=2 SV=1	0	1	0	0	0	1	0	0
sp|P35802|GPM6A_MOUSE	Gpm6a	Neuronal membrane glycoprotein M6-a OS=Mus musculus GN=Gpm6a PE=1 SV=1	3	3	0	2	1	0	4	0
sp|P35803|GPM6B_MOUSE	Gpm6b	Neuronal membrane glycoprotein M6-b OS=Mus musculus GN=Gpm6b PE=1 SV=2	10	6	4	4	4	6	7	6
sp|Q8C419|GP158_MOUSE	Gpr158	Probable G-protein coupled receptor 158 OS=Mus musculus GN=Gpr158 PE=1 SV=2	10	9	8	3	3	4	8	8
sp|Q9QY42|GPR37_MOUSE	Gpr37	Prosaposin receptor GPR37 OS=Mus musculus GN=Gpr37 PE=2 SV=1	1	1	1	1	1	0	1	1
sp|Q923Z0|GPC5B_MOUSE	Gprc5b	G-protein coupled receptor family C group 5 member B OS=Mus musculus GN=Gprc5b PE=1 SV=1	1	0	0	0	0	0	0	0
sp|Q3UNH4|GRIN1_MOUSE	Gprin1	G protein-regulated inducer of neurite outgrowth 1 OS=Mus musculus GN=Gprin1 PE=1 SV=2	1	2	2	1	1	0	1	1
sp|Q99LD4|CSN1_MOUSE	Gps1	COP9 signalosome complex subunit 1 OS=Mus musculus GN=Gps1 PE=1 SV=1	0	0	0	0	0	0	1	0
sp|O70325|GPX41_MOUSE	Gpx4	Phospholipid hydroperoxide glutathione peroxidase, mitochondrial OS=Mus musculus GN=Gpx4 PE=1 SV=4	0	2	2	1	0	1	0	2
sp|Q91Z53|GRHPR_MOUSE	Grhpr	Glyoxylate reductase/hydroxypyruvate reductase OS=Mus musculus GN=Grhpr PE=1 SV=1	0	1	0	0	0	0	1	1
sp|P23818|GRIA1_MOUSE	Gria1	Glutamate receptor 1 OS=Mus musculus GN=Gria1 PE=1 SV=1	0	1	1	0	0	0	1	2
sp|P23819|GRIA2_MOUSE	Gria2	Glutamate receptor 2 OS=Mus musculus GN=Gria2 PE=1 SV=3	4	3	5	2	2	4	5	4
sp|Q9Z2W9|GRIA3_MOUSE	Gria3	Glutamate receptor 3 OS=Mus musculus GN=Gria3 PE=1 SV=2	0	2	1	1	1	1	0	0
sp|P35438|NMDZ1_MOUSE	Grin1	Glutamate receptor ionotropic, NMDA 1 OS=Mus musculus GN=Grin1 PE=1 SV=1	0	0	0	0	0	1	0	0
sp|Q9QYS2|GRM3_MOUSE	Grm3	Metabotropic glutamate receptor 3 OS=Mus musculus GN=Grm3 PE=1 SV=1	0	0	0	1	0	1	2	0
sp|Q2NL51|GSK3A_MOUSE	Gsk3a	Glycogen synthase kinase-3 alpha OS=Mus musculus GN=Gsk3a PE=1 SV=2	5	4	2	1	2	4	6	4
sp|Q9WV60|GSK3B_MOUSE	Gsk3b	Glycogen synthase kinase-3 beta OS=Mus musculus GN=Gsk3b PE=1 SV=2	0	2	2	0	0	0	1	3
sp|Q149F3|ERF3B_MOUSE	Gspt2	Eukaryotic peptide chain release factor GTP-binding subunit ERF3B OS=Mus musculus GN=Gspt2 PE=1 SV=1	1	2	0	0	0	0	1	1
sp|P47791|GSHR_MOUSE	Gsr	Glutathione reductase, mitochondrial OS=Mus musculus GN=Gsr PE=1 SV=3	0	3	4	0	2	4	5	0
sp|P10649|GSTM1_MOUSE	Gstm1	Glutathione S-transferase Mu 1 OS=Mus musculus GN=Gstm1 PE=1 SV=2	3	5	2	2	3	3	5	8
sp|P48774|GSTM5_MOUSE	Gstm5	Glutathione S-transferase Mu 5 OS=Mus musculus GN=Gstm5 PE=1 SV=1	3	3	2	2	1	4	7	3
sp|P19157|GSTP1_MOUSE	Gstp1	Glutathione S-transferase P 1 OS=Mus musculus GN=Gstp1 PE=1 SV=2	2	2	1	1	1	2	2	1
sp|P46425|GSTP2_MOUSE	Gstp2	Glutathione S-transferase P 2 OS=Mus musculus GN=Gstp2 PE=1 SV=2	3	4	2	0	3	3	4	2
sp|Q9WVL0|MAAI_MOUSE	Gstz1	Maleylacetoacetate isomerase OS=Mus musculus GN=Gstz1 PE=1 SV=1	1	2	0	1	0	2	4	2
tr|Q3UH83|Q3UH83_MOUSE	Gucy1a2	Putative uncharacterized protein OS=Mus musculus GN=Gucy1a2 PE=2 SV=1	0	0	0	0	0	0	0	1
sp|O54865|GCYB1_MOUSE	Gucy1b3	Guanylate cyclase soluble subunit beta-1 OS=Mus musculus GN=Gucy1b3 PE=1 SV=1	1	0	1	0	0	0	1	1
sp|P0C0S6|H2AZ_MOUSE	H2afz	Histone H2A.Z OS=Mus musculus GN=H2afz PE=1 SV=2	0	0	0	0	0	1	0	0
sp|Q8K2C9|HACD3_MOUSE	Hacd3	Very-long-chain (3R)-3-hydroxyacyl-CoA dehydratase 3 OS=Mus musculus GN=Hacd3 PE=1 SV=2	2	3	3	0	0	3	2	6
sp|Q8BMS1|ECHA_MOUSE	Hadha	Trifunctional enzyme subunit alpha, mitochondrial OS=Mus musculus GN=Hadha PE=1 SV=1	4	3	4	2	3	5	6	7
sp|Q99JY0|ECHB_MOUSE	Hadhb	Trifunctional enzyme subunit beta, mitochondrial OS=Mus musculus GN=Hadhb PE=1 SV=1	2	3	3	1	0	2	6	5
sp|Q99KB8|GLO2_MOUSE	Hagh	Hydroxyacylglutathione hydrolase, mitochondrial OS=Mus musculus GN=Hagh PE=1 SV=2	0	0	0	0	0	0	2	0
sp|Q9QUP5|HPLN1_MOUSE	Hapln1	Hyaluronan and proteoglycan link protein 1 OS=Mus musculus GN=Hapln1 PE=1 SV=1	2	0	0	0	2	2	4	4
sp|Q9ESM3|HPLN2_MOUSE	Hapln2	Hyaluronan and proteoglycan link protein 2 OS=Mus musculus GN=Hapln2 PE=1 SV=1	0	0	0	0	0	0	0	1
sp|P01942|HBA_MOUSE	Hba	Hemoglobin subunit alpha OS=Mus musculus GN=Hba PE=1 SV=2	6	9	6	7	5	10	5	7
tr|Q91VB8|Q91VB8_MOUSE	Hba-a2	Alpha globin 1 OS=Mus musculus GN=Hba-a2 PE=1 SV=1	0	0	0	0	0	1	0	0
sp|P02088|HBB1_MOUSE	Hbb-b1	Hemoglobin subunit beta-1 OS=Mus musculus GN=Hbb-b1 PE=1 SV=2	7	10	7	9	7	12	10	10
sp|P02089|HBB2_MOUSE	Hbb-b2	Hemoglobin subunit beta-2 OS=Mus musculus GN=Hbb-b2 PE=1 SV=2	2	6	4	4	3	8	3	7
sp|P02104|HBE_MOUSE	Hbb-y	Hemoglobin subunit epsilon-Y2 OS=Mus musculus GN=Hbb-y PE=1 SV=2	1	0	0	0	0	0	0	0
tr|D4N6R6|D4N6R6_MUSMC	Hbbt1	Beta-globin OS=Mus musculus castaneus GN=Hbbt1 PE=3 SV=1	0	1	2	0	1	0	1	0
sp|O88704|HCN1_MOUSE	Hcn1	Potassium/sodium hyperpolarization-activated cyclic nucleotide-gated channel 1 OS=Mus musculus GN=Hcn1 PE=1 SV=1	0	1	1	0	0	0	0	0
sp|O88703|HCN2_MOUSE	Hcn2	Potassium/sodium hyperpolarization-activated cyclic nucleotide-gated channel 2 OS=Mus musculus GN=Hcn2 PE=1 SV=1	0	0	0	0	0	1	1	0
sp|O09106|HDAC1_MOUSE	Hdac1	Histone deacetylase 1 OS=Mus musculus GN=Hdac1 PE=1 SV=1	0	0	0	0	0	0	1	0
sp|Q91WA3|HDA11_MOUSE	Hdac11	Histone deacetylase 11 OS=Mus musculus GN=Hdac11 PE=1 SV=1	0	1	1	0	1	0	0	1
sp|P70288|HDAC2_MOUSE	Hdac2	Histone deacetylase 2 OS=Mus musculus GN=Hdac2 PE=1 SV=1	0	1	0	0	0	0	0	0
sp|Q9Z2V5|HDAC6_MOUSE	Hdac6	Histone deacetylase 6 OS=Mus musculus GN=Hdac6 PE=1 SV=3	1	0	0	0	0	1	1	0
sp|Q9R257|HEBP1_MOUSE	Hebp1	Heme-binding protein 1 OS=Mus musculus GN=Hebp1 PE=1 SV=2	0	0	0	0	1	0	1	2
sp|Q6I6G8|HECW2_MOUSE	Hecw2	E3 ubiquitin-protein ligase HECW2 OS=Mus musculus GN=Hecw2 PE=1 SV=1	0	0	0	0	0	1	0	1
sp|Q640R3|HECAM_MOUSE	Hepacam	Hepatocyte cell adhesion molecule OS=Mus musculus GN=Hepacam PE=1 SV=2	4	6	4	4	4	4	3	4
sp|Q8QZS1|HIBCH_MOUSE	Hibch	3-hydroxyisobutyryl-CoA hydrolase, mitochondrial OS=Mus musculus GN=Hibch PE=1 SV=1	0	1	0	0	0	0	0	0
sp|P70349|HINT1_MOUSE	Hint1	Histidine triad nucleotide-binding protein 1 OS=Mus musculus GN=Hint1 PE=1 SV=3	1	1	1	1	1	1	1	1
sp|P43277|H13_MOUSE	Hist1h1d	Histone H1.3 OS=Mus musculus GN=Hist1h1d PE=1 SV=2	2	0	2	1	1	2	1	1
sp|P43274|H14_MOUSE	Hist1h1e	Histone H1.4 OS=Mus musculus GN=Hist1h1e PE=1 SV=2	0	0	1	0	1	1	0	0
sp|C0HKE3|H2A1D_MOUSE	Hist1h2ad	Histone H2A type 1-D OS=Mus musculus GN=Hist1h2ad PE=1 SV=1	1	1	1	1	1	1	2	3
sp|Q8CGP1|H2B1K_MOUSE	Hist1h2bk	Histone H2B type 1-K OS=Mus musculus GN=Hist1h2bk PE=1 SV=3	4	7	5	5	3	5	5	6
sp|P68433|H31_MOUSE	Hist1h3a	Histone H3.1 OS=Mus musculus GN=Hist1h3a PE=1 SV=2	4	3	3	0	0	3	4	0
sp|P62806|H4_MOUSE	Hist1h4a	Histone H4 OS=Mus musculus GN=Hist1h4a PE=1 SV=2	8	9	6	4	4	8	9	5
sp|P17710|HXK1_MOUSE	Hk1	Hexokinase-1 OS=Mus musculus GN=Hk1 PE=1 SV=3	0	3	0	0	0	2	0	8
sp|Q91W97|HKDC1_MOUSE	Hkdc1	Putative hexokinase HKDC1 OS=Mus musculus GN=Hkdc1 PE=2 SV=1	0	1	0	0	0	0	1	1
sp|Q920N2|BPL1_MOUSE	Hlcs	Biotin--protein ligase OS=Mus musculus GN=Hlcs PE=1 SV=1	7	5	8	11	11	8	5	7
sp|Q8JZK9|HMCS1_MOUSE	Hmgcs1	Hydroxymethylglutaryl-CoA synthase, cytoplasmic OS=Mus musculus GN=Hmgcs1 PE=1 SV=1	0	0	0	0	0	0	1	0
sp|P49312|ROA1_MOUSE	Hnrnpa1	Heterogeneous nuclear ribonucleoprotein A1 OS=Mus musculus GN=Hnrnpa1 PE=1 SV=2	0	0	2	0	0	0	1	0
sp|Q99020|ROAA_MOUSE	Hnrnpab	Heterogeneous nuclear ribonucleoprotein A/B OS=Mus musculus GN=Hnrnpab PE=1 SV=1	0	1	0	0	0	0	1	0
sp|Q9Z204|HNRPC_MOUSE	Hnrnpc	Heterogeneous nuclear ribonucleoproteins C1/C2 OS=Mus musculus GN=Hnrnpc PE=1 SV=1	0	1	0	0	0	0	0	0
sp|Q60668|HNRPD_MOUSE	Hnrnpd	Heterogeneous nuclear ribonucleoprotein D0 OS=Mus musculus GN=Hnrnpd PE=1 SV=2	1	1	0	0	0	0	0	0
sp|P61979|HNRPK_MOUSE	Hnrnpk	Heterogeneous nuclear ribonucleoprotein K OS=Mus musculus GN=Hnrnpk PE=1 SV=1	0	1	0	0	0	1	0	2
sp|Q8R081|HNRPL_MOUSE	Hnrnpl	Heterogeneous nuclear ribonucleoprotein L OS=Mus musculus GN=Hnrnpl PE=1 SV=2	2	5	3	2	1	2	2	1
sp|Q921F4|HNRLL_MOUSE	Hnrnpll	Heterogeneous nuclear ribonucleoprotein L-like OS=Mus musculus GN=Hnrnpll PE=1 SV=3	0	0	0	0	0	0	0	2
sp|Q8VEK3|HNRPU_MOUSE	Hnrnpu	Heterogeneous nuclear ribonucleoprotein U OS=Mus musculus GN=Hnrnpu PE=1 SV=1	5	15	4	2	2	4	5	7
sp|Q00PI9|HNRL2_MOUSE	Hnrnpul2	Heterogeneous nuclear ribonucleoprotein U-like protein 2 OS=Mus musculus GN=Hnrnpul2 PE=1 SV=2	1	2	0	1	0	0	2	4
sp|Q61646|HPT_MOUSE	Hp	Haptoglobin OS=Mus musculus GN=Hp PE=1 SV=1	0	0	1	0	0	0	0	0
sp|P84075|HPCA_MOUSE	Hpca	Neuron-specific calcium-binding protein hippocalcin OS=Mus musculus GN=Hpca PE=1 SV=2	0	0	0	0	0	2	0	2
sp|P62748|HPCL1_MOUSE	Hpcal1	Hippocalcin-like protein 1 OS=Mus musculus GN=Hpcal1 PE=1 SV=2	2	2	1	2	3	3	2	2
sp|Q8BGZ1|HPCL4_MOUSE	Hpcal4	Hippocalcin-like protein 4 OS=Mus musculus GN=Hpcal4 PE=1 SV=3	0	0	0	0	0	0	1	0
sp|P00493|HPRT_MOUSE	Hprt1	Hypoxanthine-guanine phosphoribosyltransferase OS=Mus musculus GN=Hprt1 PE=1 SV=3	1	0	0	0	0	0	1	0
sp|Q61411|RASH_MOUSE	Hras	GTPase HRas OS=Mus musculus GN=Hras PE=1 SV=2	3	2	1	2	2	3	3	5
sp|O08756|HCD2_MOUSE	Hsd17b10	3-hydroxyacyl-CoA dehydrogenase type-2 OS=Mus musculus GN=Hsd17b10 PE=1 SV=4	6	5	5	5	3	4	7	5
sp|Q9EQ06|DHB11_MOUSE	Hsd17b11	Estradiol 17-beta-dehydrogenase 11 OS=Mus musculus GN=Hsd17b11 PE=1 SV=1	1	1	1	1	0	0	0	0
sp|O70503|DHB12_MOUSE	Hsd17b12	Very-long-chain 3-oxoacyl-CoA reductase OS=Mus musculus GN=Hsd17b12 PE=1 SV=1	0	0	0	0	0	0	2	0
sp|P51660|DHB4_MOUSE	Hsd17b4	Peroxisomal multifunctional enzyme type 2 OS=Mus musculus GN=Hsd17b4 PE=1 SV=3	0	0	0	0	0	0	3	0
sp|P50171|DHB8_MOUSE	Hsd17b8	Estradiol 17-beta-dehydrogenase 8 OS=Mus musculus GN=Hsd17b8 PE=1 SV=2	0	0	0	0	0	0	2	1
sp|Q8BTX9|HSDL1_MOUSE	Hsdl1	Inactive hydroxysteroid dehydrogenase-like protein 1 OS=Mus musculus GN=Hsdl1 PE=1 SV=1	0	2	0	1	0	0	2	0
sp|Q2TPA8|HSDL2_MOUSE	Hsdl2	Hydroxysteroid dehydrogenase-like protein 2 OS=Mus musculus GN=Hsdl2 PE=1 SV=1	0	0	0	0	0	0	1	0
sp|P07901|HS90A_MOUSE	Hsp90aa1	Heat shock protein HSP 90-alpha OS=Mus musculus GN=Hsp90aa1 PE=1 SV=4	11	14	9	8	7	15	16	15
sp|P11499|HS90B_MOUSE	Hsp90ab1	Heat shock protein HSP 90-beta OS=Mus musculus GN=Hsp90ab1 PE=1 SV=3	19	28	23	23	17	29	32	39
sp|P08113|ENPL_MOUSE	Hsp90b1	Endoplasmin OS=Mus musculus GN=Hsp90b1 PE=1 SV=2	1	3	1	2	1	2	3	1
sp|Q8K0U4|HS12A_MOUSE	Hspa12a	Heat shock 70 kDa protein 12A OS=Mus musculus GN=Hspa12a PE=1 SV=1	14	16	11	7	8	14	17	15
sp|P17879|HS71B_MOUSE	Hspa1b	Heat shock 70 kDa protein 1B OS=Mus musculus GN=Hspa1b PE=1 SV=3	4	3	7	1	1	2	4	5
sp|P17156|HSP72_MOUSE	Hspa2	Heat shock-related 70 kDa protein 2 OS=Mus musculus GN=Hspa2 PE=1 SV=2	7	6	4	3	4	6	5	5
sp|Q61316|HSP74_MOUSE	Hspa4	Heat shock 70 kDa protein 4 OS=Mus musculus GN=Hspa4 PE=1 SV=1	27	23	20	14	14	22	26	30
sp|P48722|HS74L_MOUSE	Hspa4l	Heat shock 70 kDa protein 4L OS=Mus musculus GN=Hspa4l PE=1 SV=2	10	14	5	5	5	13	11	16
sp|P20029|GRP78_MOUSE	Hspa5	78 kDa glucose-regulated protein OS=Mus musculus GN=Hspa5 PE=1 SV=3	10	11	6	4	7	9	12	11
sp|P63017|HSP7C_MOUSE	Hspa8	Heat shock cognate 71 kDa protein OS=Mus musculus GN=Hspa8 PE=1 SV=1	25	34	25	15	25	30	25	31
sp|P38647|GRP75_MOUSE	Hspa9	Stress-70 protein, mitochondrial OS=Mus musculus GN=Hspa9 PE=1 SV=3	5	8	1	3	1	6	5	4
sp|P63038|CH60_MOUSE	Hspd1	60 kDa heat shock protein, mitochondrial OS=Mus musculus GN=Hspd1 PE=1 SV=1	7	8	8	8	7	9	11	9
sp|Q64433|CH10_MOUSE	Hspe1	10 kDa heat shock protein, mitochondrial OS=Mus musculus GN=Hspe1 PE=1 SV=2	0	1	0	0	0	0	1	0
sp|Q61699|HS105_MOUSE	Hsph1	Heat shock protein 105 kDa OS=Mus musculus GN=Hsph1 PE=1 SV=2	7	10	7	5	3	5	11	9
sp|Q7TMY8|HUWE1_MOUSE	Huwe1	E3 ubiquitin-protein ligase HUWE1 OS=Mus musculus GN=Huwe1 PE=1 SV=5	0	0	0	0	0	2	0	0
sp|Q8BU30|SYIC_MOUSE	Iars	Isoleucine--tRNA ligase, cytoplasmic OS=Mus musculus GN=Iars PE=1 SV=2	0	1	0	0	0	0	0	0
sp|Q8BIJ6|SYIM_MOUSE	Iars2	Isoleucine--tRNA ligase, mitochondrial OS=Mus musculus GN=Iars2 PE=1 SV=1	0	3	2	1	0	2	2	4
sp|Q8CAK1|CAF17_MOUSE	Iba57	Putative transferase CAF17 homolog, mitochondrial OS=Mus musculus GN=Iba57 PE=1 SV=1	0	1	0	0	0	0	0	0
sp|Q9D6R2|IDH3A_MOUSE	Idh3a	Isocitrate dehydrogenase [NAD] subunit alpha, mitochondrial OS=Mus musculus GN=Idh3a PE=1 SV=1	3	5	4	2	2	3	6	5
tr|Q91VA7|Q91VA7_MOUSE	Idh3b	Isocitrate dehydrogenase [NAD] subunit, mitochondrial OS=Mus musculus GN=Idh3b PE=1 SV=1	4	7	1	0	5	8	8	7
sp|P70404|IDHG1_MOUSE	Idh3g	Isocitrate dehydrogenase [NAD] subunit gamma 1, mitochondrial OS=Mus musculus GN=Idh3g PE=1 SV=1	5	14	3	5	0	5	10	8
sp|P01865|GCAM_MOUSE	Igh-1a	Ig gamma-2A chain C region, membrane-bound form OS=Mus musculus GN=Igh-1a PE=1 SV=3	0	3	0	0	0	0	0	0
sp|Q8R366|IGSF8_MOUSE	Igsf8	Immunoglobulin superfamily member 8 OS=Mus musculus GN=Igsf8 PE=1 SV=2	12	12	8	8	6	8	13	8
sp|Q8CAQ8|MIC60_MOUSE	Immt	MICOS complex subunit Mic60 OS=Mus musculus GN=Immt PE=1 SV=1	8	10	4	4	8	10	8	5
sp|O55023|IMPA1_MOUSE	Impa1	Inositol monophosphatase 1 OS=Mus musculus GN=Impa1 PE=1 SV=1	5	6	6	5	5	6	7	7
sp|O55091|IMPCT_MOUSE	Impact	Protein IMPACT OS=Mus musculus GN=Impact PE=1 SV=2	0	0	0	2	0	2	0	4
sp|P46660|AINX_MOUSE	Ina	Alpha-internexin OS=Mus musculus GN=Ina PE=1 SV=3	8	13	9	12	6	11	7	11
sp|P49442|INPP_MOUSE	Inpp1	Inositol polyphosphate 1-phosphatase OS=Mus musculus GN=Inpp1 PE=1 SV=2	1	4	1	0	0	2	4	1
sp|Q8R0S2|IQEC1_MOUSE	Iqsec1	IQ motif and SEC7 domain-containing protein 1 OS=Mus musculus GN=Iqsec1 PE=1 SV=2	2	3	1	1	0	3	2	1
sp|Q5DU25|IQEC2_MOUSE	Iqsec2	IQ motif and SEC7 domain-containing protein 2 OS=Mus musculus GN=Iqsec2 PE=1 SV=3	0	0	2	1	0	1	0	2
sp|P35569|IRS1_MOUSE	Irs1	Insulin receptor substrate 1 OS=Mus musculus GN=Irs1 PE=1 SV=1	0	0	1	0	0	0	0	0
sp|Q91V64|ISOC1_MOUSE	Isoc1	Isochorismatase domain-containing protein 1 OS=Mus musculus GN=Isoc1 PE=1 SV=1	0	1	0	0	1	1	1	1
sp|P85094|ISC2A_MOUSE	Isoc2a	Isochorismatase domain-containing protein 2A OS=Mus musculus GN=Isoc2a PE=1 SV=1	0	0	0	0	0	0	0	2
sp|Q9D892|ITPA_MOUSE	Itpa	Inosine triphosphate pyrophosphatase OS=Mus musculus GN=Itpa PE=1 SV=2	0	1	0	0	0	1	1	2
sp|P11881|ITPR1_MOUSE	Itpr1	Inositol 1,4,5-trisphosphate receptor type 1 OS=Mus musculus GN=Itpr1 PE=1 SV=2	2	3	0	0	0	3	0	1
sp|Q9Z0R4|ITSN1_MOUSE	Itsn1	Intersectin-1 OS=Mus musculus GN=Itsn1 PE=1 SV=2	0	0	0	0	0	0	0	1
sp|Q5XKN4|JAGN1_MOUSE	Jagn1	Protein jagunal homolog 1 OS=Mus musculus GN=Jagn1 PE=1 SV=2	0	0	1	0	0	0	0	0
sp|Q5DTX6|JCAD_MOUSE	Jcad	Junctional protein associated with coronary artery disease OS=Mus musculus GN=Jcad PE=1 SV=2	0	0	0	0	1	0	0	0
sp|A2CG49|KALRN_MOUSE	Kalrn	Kalirin OS=Mus musculus GN=Kalrn PE=1 SV=1	0	1	0	0	0	0	0	0
sp|Q8BNW9|KBTBB_MOUSE	Kbtbd11	Kelch repeat and BTB domain-containing protein 11 OS=Mus musculus GN=Kbtbd11 PE=1 SV=3	3	4	5	2	2	4	3	3
sp|P16388|KCNA1_MOUSE	Kcna1	Potassium voltage-gated channel subfamily A member 1 OS=Mus musculus GN=Kcna1 PE=1 SV=1	0	1	0	1	0	0	0	0
sp|B2RQA1|KCA10_MOUSE	Kcna10	Potassium voltage-gated channel subfamily A member 10 OS=Mus musculus GN=Kcna10 PE=2 SV=1	1	1	0	0	1	1	1	1
sp|P63141|KCNA2_MOUSE	Kcna2	Potassium voltage-gated channel subfamily A member 2 OS=Mus musculus GN=Kcna2 PE=1 SV=1	2	1	0	0	0	2	1	2
sp|P62482|KCAB2_MOUSE	Kcnab2	Voltage-gated potassium channel subunit beta-2 OS=Mus musculus GN=Kcnab2 PE=1 SV=1	1	2	1	1	1	1	3	3
sp|Q08460|KCMA1_MOUSE	Kcnma1	Calcium-activated potassium channel subunit alpha-1 OS=Mus musculus GN=Kcnma1 PE=1 SV=2	1	2	1	0	0	0	1	0
sp|Q6WVG3|KCD12_MOUSE	Kctd12	BTB/POZ domain-containing protein KCTD12 OS=Mus musculus GN=Kctd12 PE=1 SV=1	1	5	3	0	0	0	3	2
sp|Q5DTY9|KCD16_MOUSE	Kctd16	BTB/POZ domain-containing protein KCTD16 OS=Mus musculus GN=Kctd16 PE=1 SV=2	2	0	0	1	0	1	0	1
sp|Q8R0A7|K0513_MOUSE	Kiaa0513	Uncharacterized protein KIAA0513 OS=Mus musculus GN=Kiaa0513 PE=1 SV=1	0	0	0	0	0	0	1	0
sp|P33173|KIF1A_MOUSE	Kif1a	Kinesin-like protein KIF1A OS=Mus musculus GN=Kif1a PE=1 SV=2	2	4	2	3	2	3	3	4
sp|Q6ZPU9|KBP_MOUSE	Kif1bp	KIF1-binding protein OS=Mus musculus GN=Kif1bp PE=1 SV=2	0	2	0	0	0	1	0	0
sp|Q9QXL2|KI21A_MOUSE	Kif21a	Kinesin-like protein KIF21A OS=Mus musculus GN=Kif21a PE=1 SV=2	5	6	3	4	0	4	0	4
sp|Q9QXL1|KI21B_MOUSE	Kif21b	Kinesin-like protein KIF21B OS=Mus musculus GN=Kif21b PE=1 SV=2	1	0	0	1	0	1	1	0
sp|P28740|KIF2A_MOUSE	Kif2a	Kinesin-like protein KIF2A OS=Mus musculus GN=Kif2a PE=1 SV=2	5	4	4	0	2	4	3	3
sp|P28738|KIF5C_MOUSE	Kif5c	Kinesin heavy chain isoform 5C OS=Mus musculus GN=Kif5c PE=1 SV=3	2	1	2	0	0	1	1	1
sp|Q71RI9|KAT3_MOUSE	Kyat3	Kynurenine--oxoglutarate transaminase 3 OS=Mus musculus GN=Kyat3 PE=1 SV=1	0	0	0	0	0	0	0	2
tr|Q6PGJ3|Q6PGJ3_MOUSE	L1cam	L1 cell adhesion molecule OS=Mus musculus GN=L1cam PE=1 SV=1	0	1	0	1	1	0	0	1
sp|Q91YP0|L2HDH_MOUSE	L2hgdh	L-2-hydroxyglutarate dehydrogenase, mitochondrial OS=Mus musculus GN=L2hgdh PE=1 SV=1	0	1	0	0	0	0	0	0
sp|Q9EP89|LACTB_MOUSE	Lactb	Serine beta-lactamase-like protein LACTB, mitochondrial OS=Mus musculus GN=Lactb PE=1 SV=1	0	0	0	0	0	0	0	1
sp|Q9D387|LAMP5_MOUSE	Lamp5	Lysosome-associated membrane glycoprotein 5 OS=Mus musculus GN=Lamp5 PE=1 SV=2	0	0	0	0	0	0	1	0
sp|O89112|LANC1_MOUSE	Lancl1	LanC-like protein 1 OS=Mus musculus GN=Lancl1 PE=1 SV=1	1	1	0	2	2	3	4	3
sp|Q9JJK2|LANC2_MOUSE	Lancl2	LanC-like protein 2 OS=Mus musculus GN=Lancl2 PE=1 SV=1	0	4	0	0	0	2	0	1
sp|Q6ZQ58|LARP1_MOUSE	Larp1	La-related protein 1 OS=Mus musculus GN=Larp1 PE=1 SV=3	1	2	2	1	1	0	0	2
sp|Q8BMJ2|SYLC_MOUSE	Lars	Leucine--tRNA ligase, cytoplasmic OS=Mus musculus GN=Lars PE=1 SV=2	0	1	0	0	0	0	0	0
sp|Q61792|LASP1_MOUSE	Lasp1	LIM and SH3 domain protein 1 OS=Mus musculus GN=Lasp1 PE=1 SV=1	3	2	3	0	0	1	2	3
sp|P06151|LDHA_MOUSE	Ldha	L-lactate dehydrogenase A chain OS=Mus musculus GN=Ldha PE=1 SV=3	10	17	10	10	10	10	15	14
sp|P16125|LDHB_MOUSE	Ldhb	L-lactate dehydrogenase B chain OS=Mus musculus GN=Ldhb PE=1 SV=2	14	25	13	18	8	19	19	22
sp|P00342|LDHC_MOUSE	Ldhc	L-lactate dehydrogenase C chain OS=Mus musculus GN=Ldhc PE=1 SV=2	0	1	1	1	1	1	1	1
sp|Q8VED9|LEGL_MOUSE	Lgalsl	Galectin-related protein OS=Mus musculus GN=Lgalsl PE=1 SV=1	1	0	0	0	0	0	0	0
sp|Q9JIA1|LGI1_MOUSE	Lgi1	Leucine-rich glioma-inactivated protein 1 OS=Mus musculus GN=Lgi1 PE=1 SV=1	5	7	5	5	5	7	7	9
sp|Q8K406|LGI3_MOUSE	Lgi3	Leucine-rich repeat LGI family member 3 OS=Mus musculus GN=Lgi3 PE=1 SV=1	3	1	1	1	0	0	0	1
sp|Q9D1T0|LIGO1_MOUSE	Lingo1	Leucine-rich repeat and immunoglobulin-like domain-containing nogo receptor-interacting protein 1 OS=Mus musculus GN=Lingo1 PE=1 SV=1	0	0	0	0	0	0	1	0
sp|Q80Y17|L2GL1_MOUSE	Llgl1	Lethal(2) giant larvae protein homolog 1 OS=Mus musculus GN=Llgl1 PE=1 SV=1	2	3	0	2	2	1	0	3
sp|Q7TQ95|LNP_MOUSE	Lnp	Protein lunapark OS=Mus musculus GN=Lnp PE=1 SV=1	0	0	0	0	0	0	1	0
[truncated: 728 more rows]

## Sheet: Fig.3-SD2 peptides Syt-1 cKODA
Figure 3 - Source Data 2
[truncated: 1,517 more rows]

[truncated: 2 more sheets: Fig.3S1-SD1 Venn RIM cKODA, Fig.3S2-SD1 Venn Syt-1 cKODA]
