# Supplementary figures and images for: Protein composition of axonal dopamine release sites in the striatum
Source: eLife journal article supplement (doi:10.7554/elife.83018), 2022-12-29

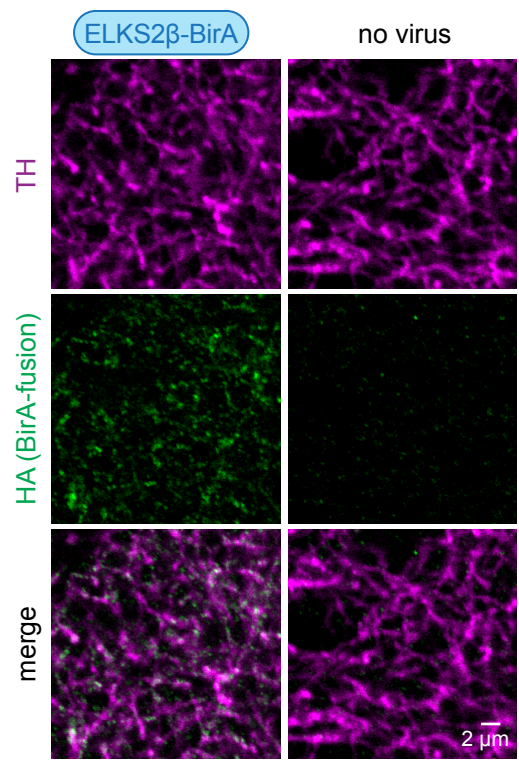

Kershberg et al., Fig. 1- figure supplement 1

Supplement: supp [file elife_poa_e83018_Figure_1_figure_supplement_1.pdf › elife_poa_e83018_Figure_1_figure_supplement_1.pdf]

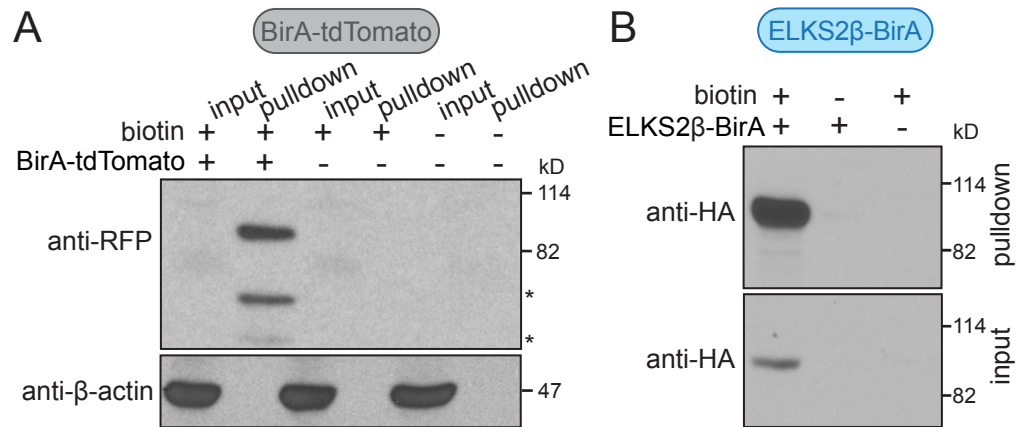

Kershberg et al., Fig. 1 - figure supplement 2

Supplement: supp [file elife_poa_e83018_Figure_1_figure_supplement_2.pdf › elife_poa_e83018_Figure_1_figure_supplement_2.pdf]

1.5-fold enrichment threshold

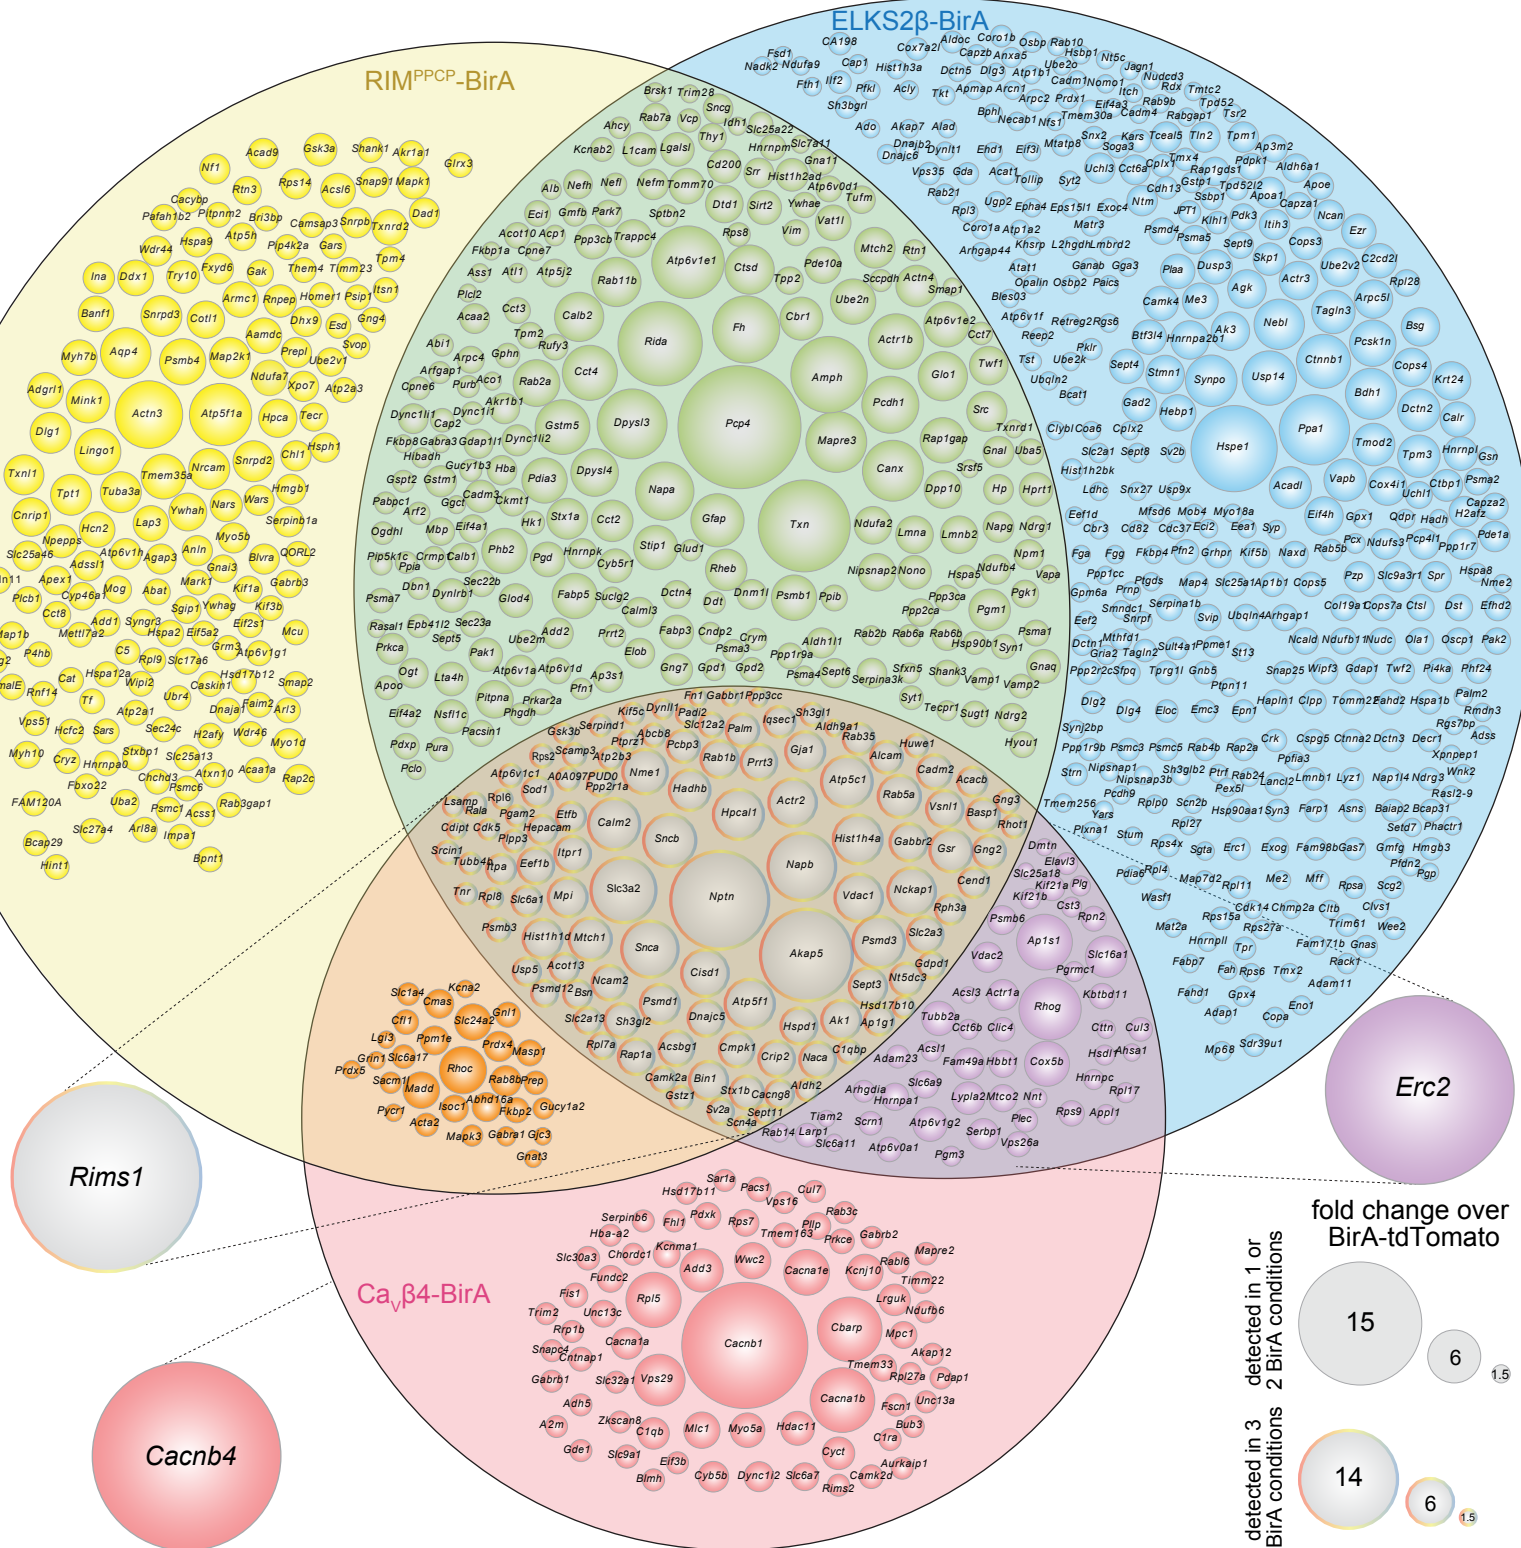

Kershberg et al., Fig. 2 - figure supplement 1

Supplement: supp [file elife_poa_e83018_Figure_2_figure_supplement_1.pdf › elife_poa_e83018_Figure_2_figure_supplement_1.pdf]

2.5-fold enrichment threshold

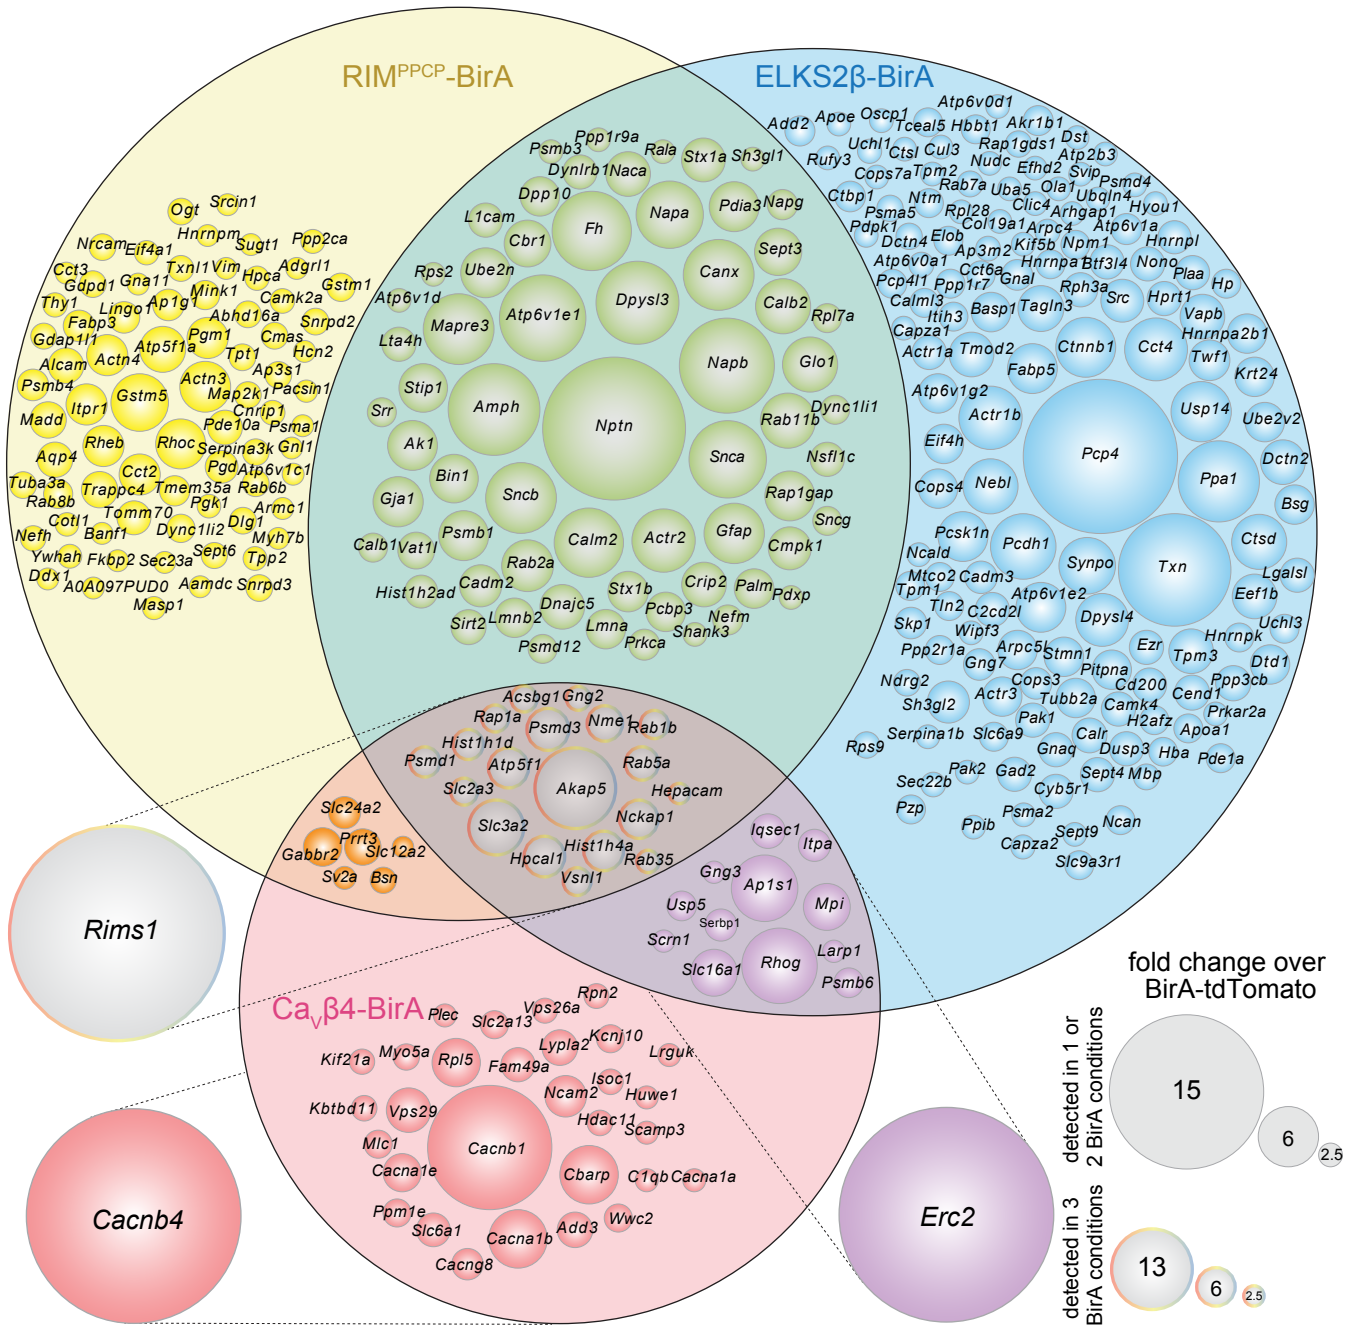

Kershberg et al., Fig. 2 - figure supplement 2

Supplement: supp [file elife_poa_e83018_Figure_2_figure_supplement_2.pdf › elife_poa_e83018_Figure_2_figure_supplement_2.pdf]

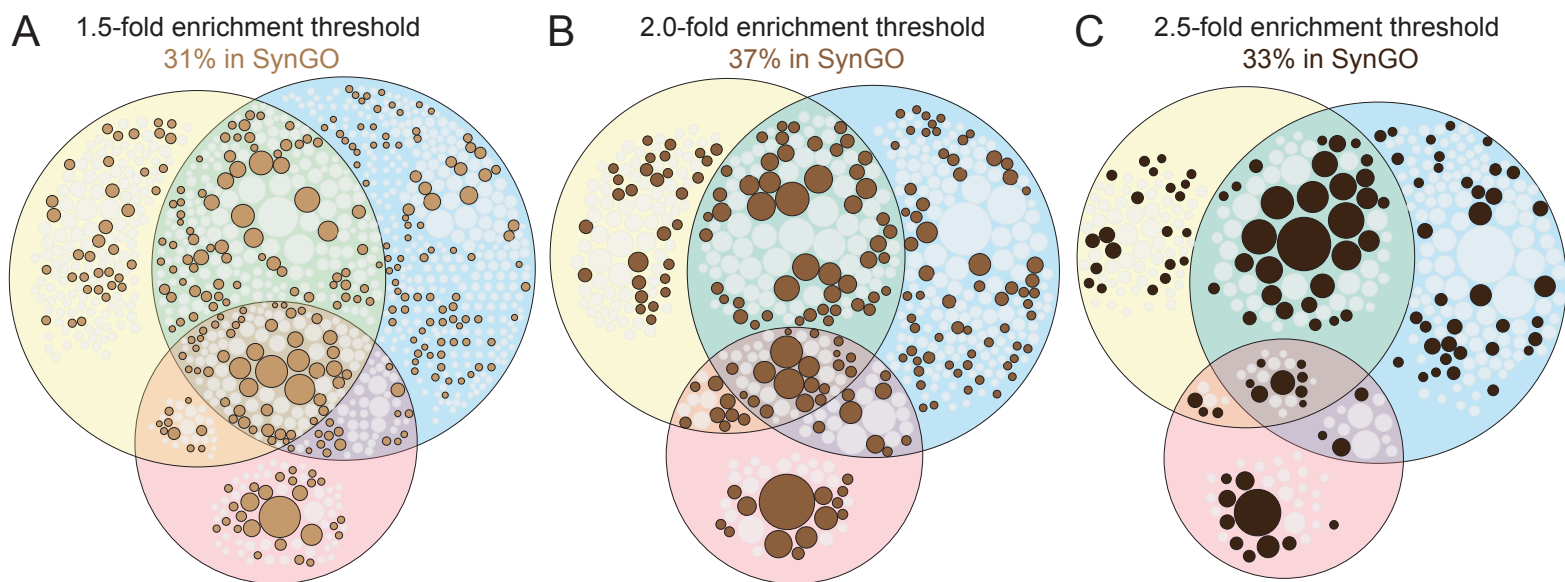

Kershberg et al., Fig. 2 - figure supplement 3

Supplement: supp [file elife_poa_e83018_Figure_2_figure_supplement_3.pdf › elife_poa_e83018_Figure_2_figure_supplement_3.pdf]

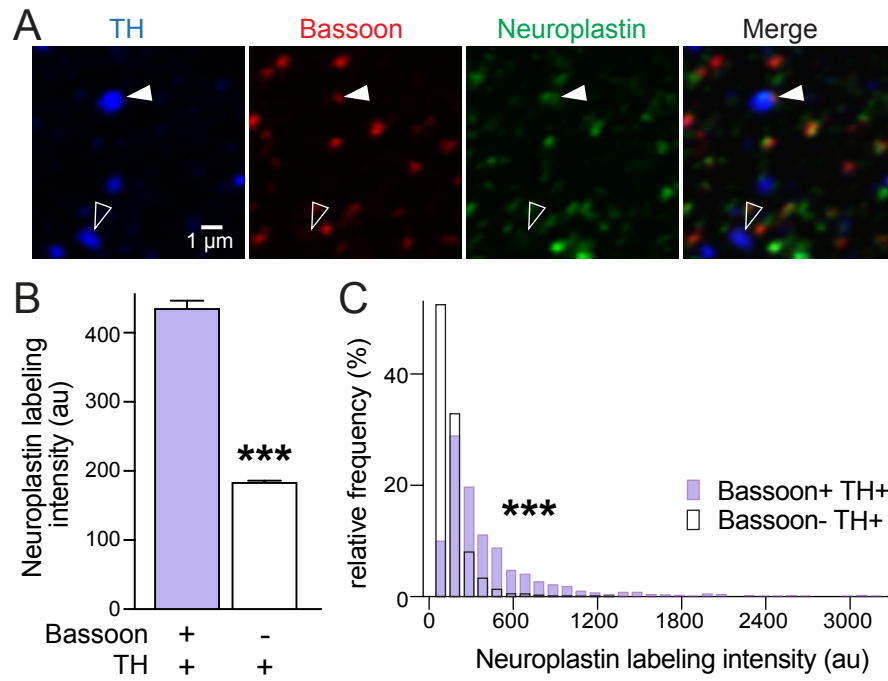

Kershberg et al., Fig. 2 - figure supplement 4

Supplement: supp [file elife_poa_e83018_Figure_2_figure_supplement_4.pdf › elife_poa_e83018_Figure_2_figure_supplement_4.pdf]

## A RIM cKO<sup>DA</sup>

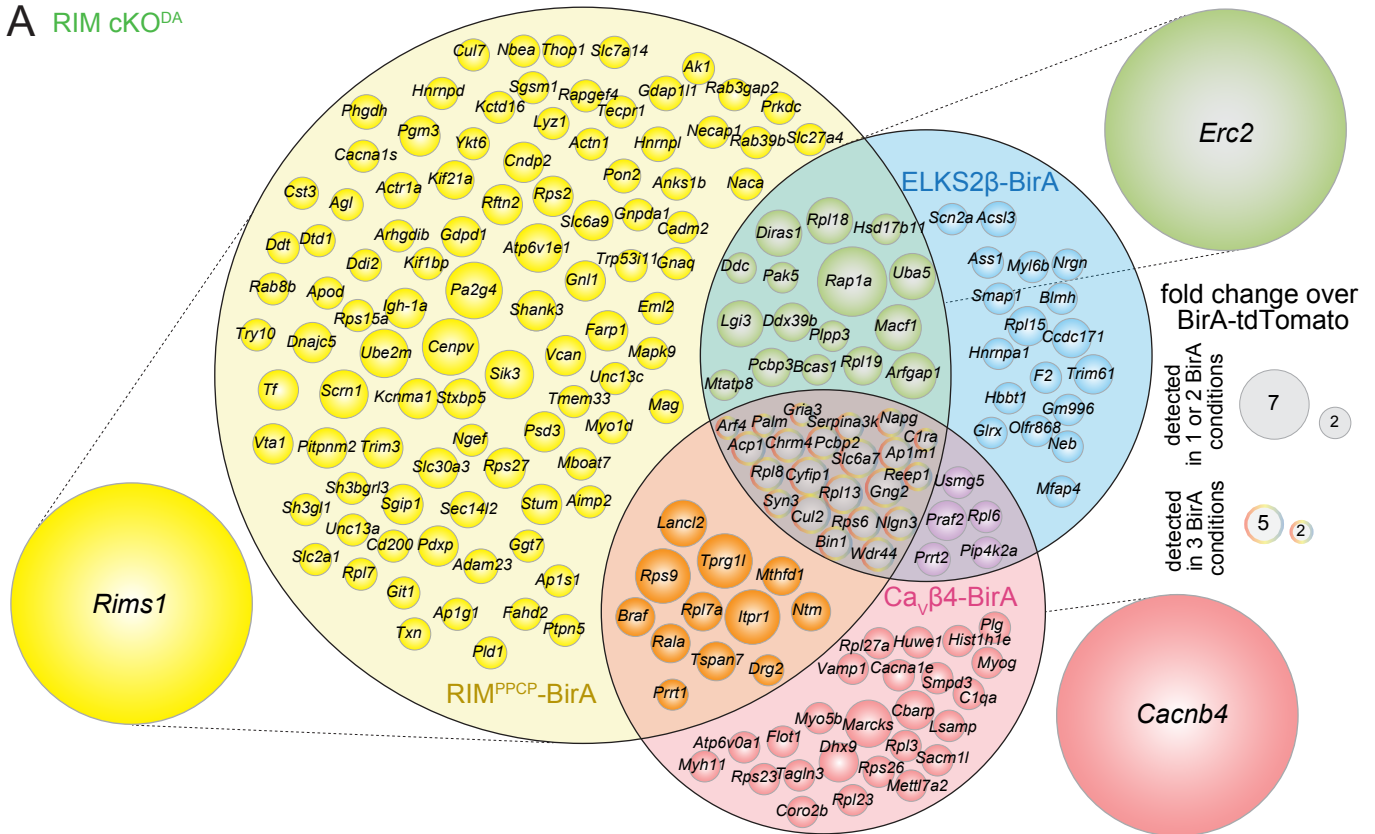

## B synaptic

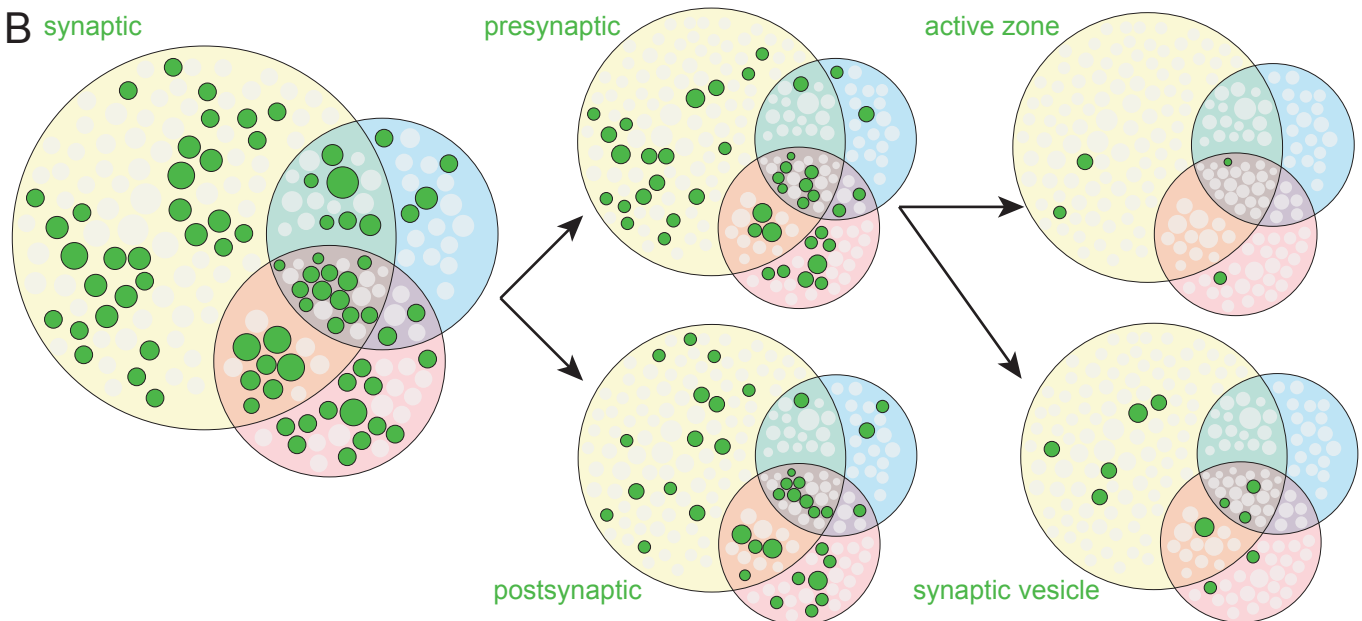

Supplement: supp [file elife_poa_e83018_Figure_3_figure_supplement_1.pdf › elife_poa_e83018_Figure_3_figure_supplement_1.pdf]

**A** Syt-1 cKO<sup>DA</sup>

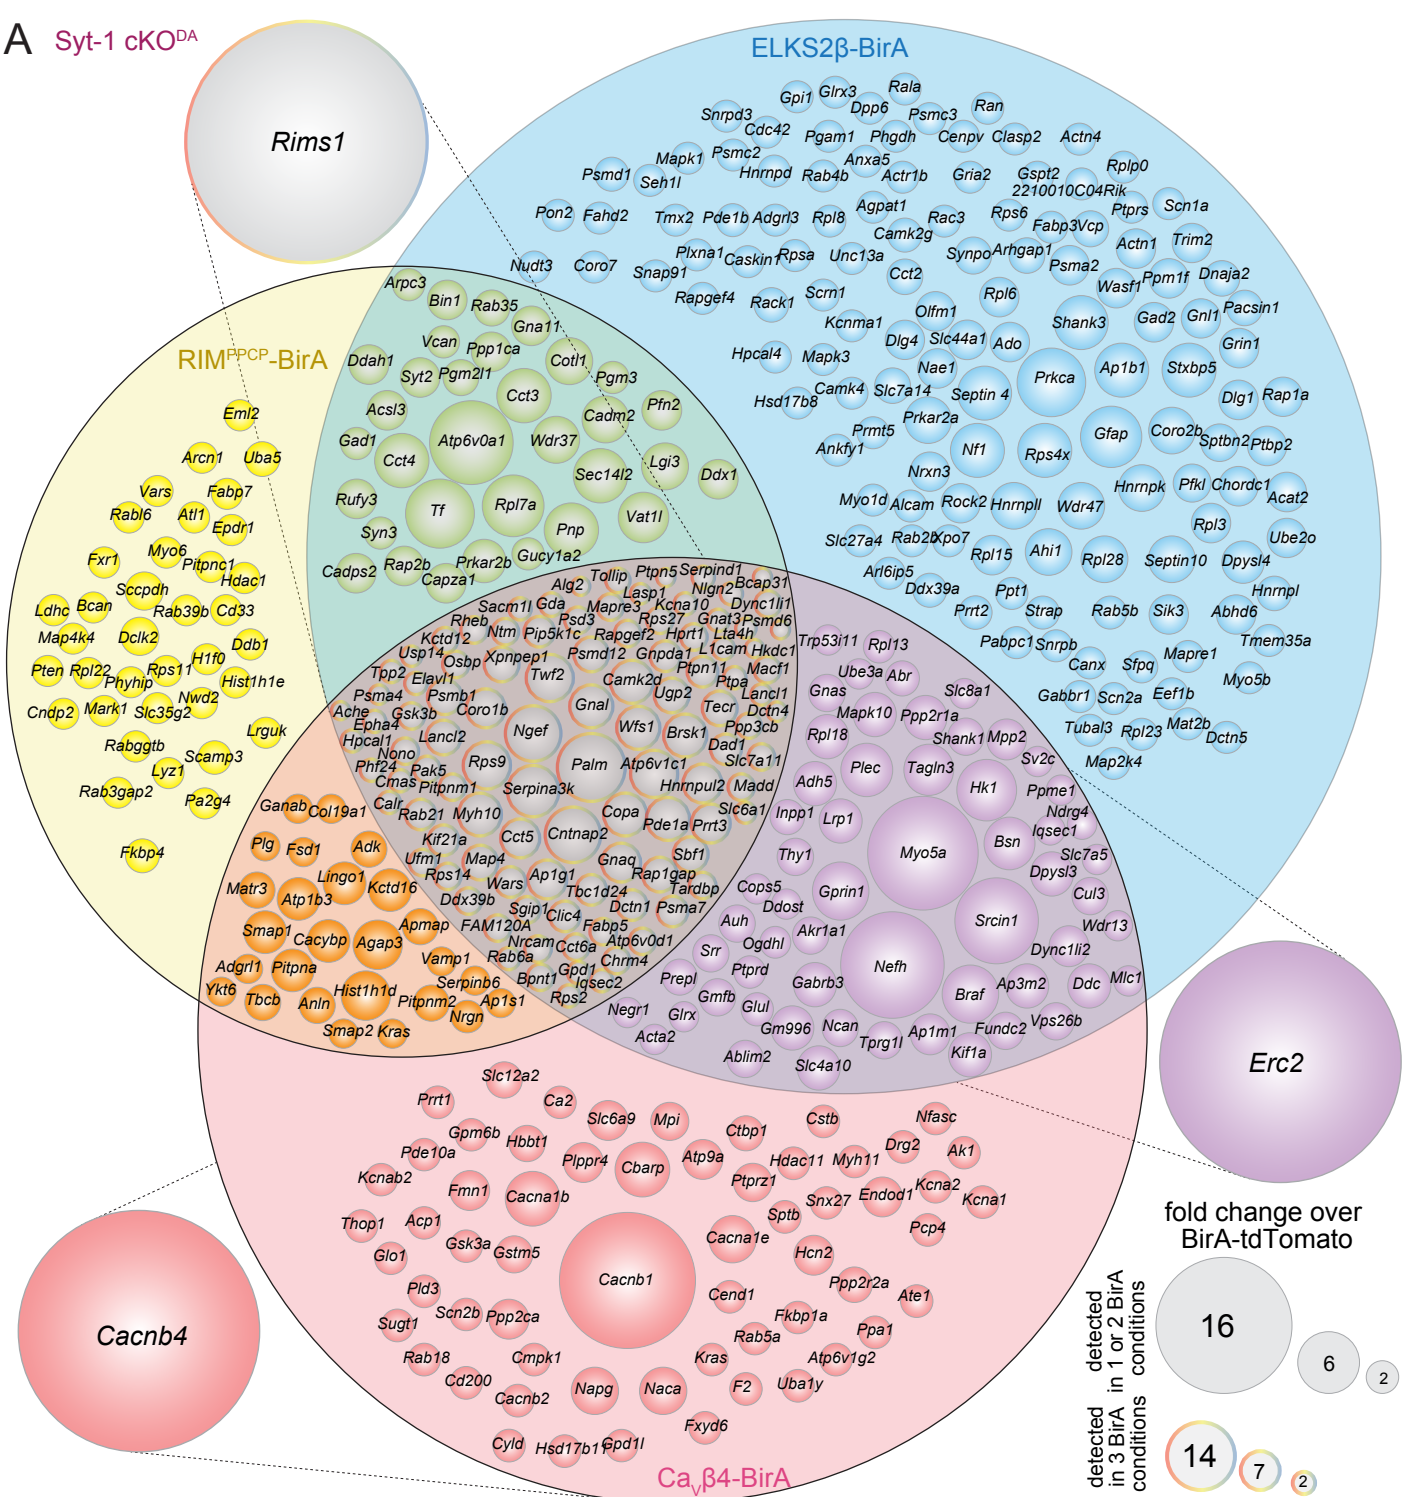

**B** synaptic

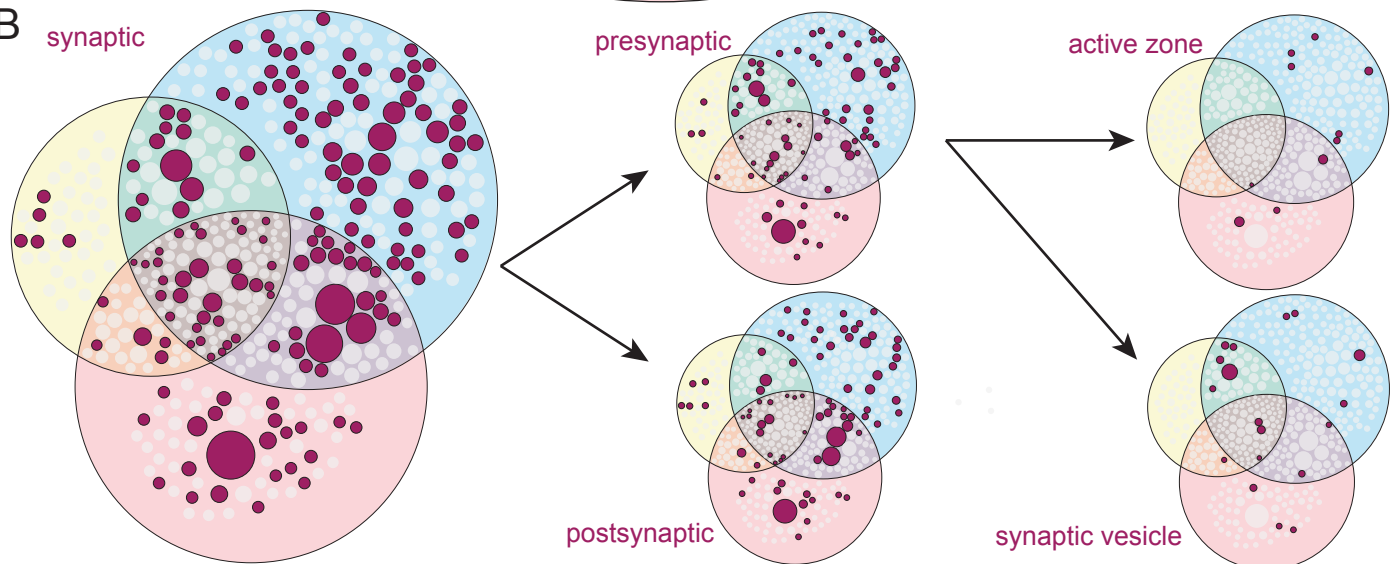

Supplement: supp [file elife_poa_e83018_Figure_3_figure_supplement_2.pdf › elife_poa_e83018_Figure_3_figure_supplement_2.pdf]

# A synaptic vesicle

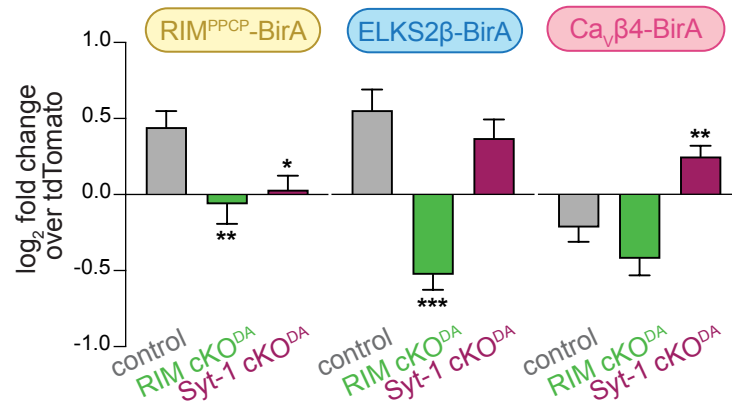

# B postsynaptic

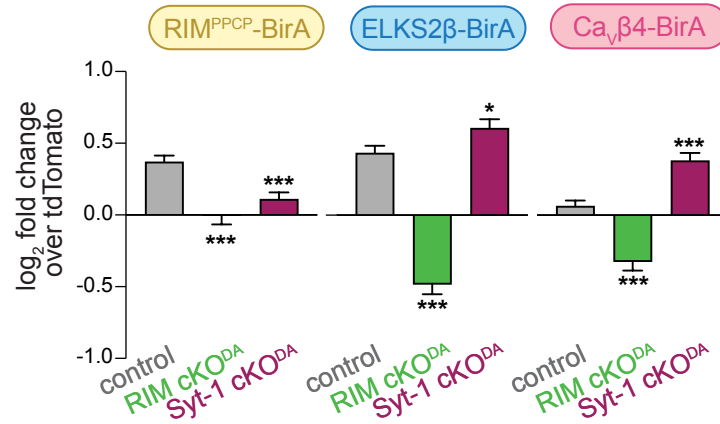

Supplement: supp [file elife_poa_e83018_Figure_4_figure_supplement_1.pdf › elife_poa_e83018_Figure_4_figure_supplement_1.pdf]
